# Supplementary material for: Synthesis, and Biological Evaluations of Novel Pyrazinoic Acid Derivatives as Anticancer Agents
Source: Research Square preprint supplement (doi:10.21203/rs.3.rs-883588/v1), 2021-10-01
Supplement: Supplementary file 1 [file 323ee48803a631be21f9de08.docx]

**Synthesis** **and biological evaluation of novel pyrazinoic acid derivatives as anticancer agents**

Shiva akhlaghi.1,2 Azar Mostoufi.2 Hadi kalantar.1 Masood Fereidoonnezhad.1,2 ✉

1Toxicology Research Center, Medical Basic Sciences Research Institute, Ahvaz Jundishapur University of Medical Sciences, Ahvaz, Iran.

2Department of Medicinal Chemistry, School of Pharmacy, Ahvaz Jundishapur University of Medical Sciences, Ahvaz, Iran.

✉Corresponding author. Tel.: +98 61 33112278; Fax: +98 61 33738381; Email: Fereidoonnezhad-m@ajums.ac.ir

## 2-(cyclohexylamino)-1-(2-methoxyphenyl)-2-oxoethyl pyrazine-2-carboxylate (P1)


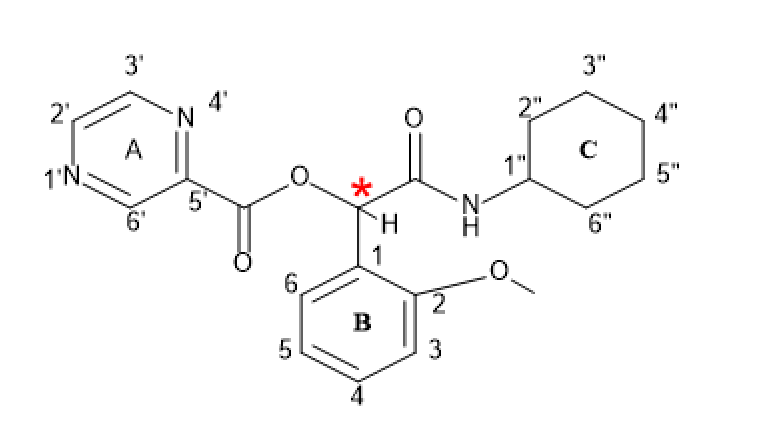


## P1

Yield: 77%, mp: 134-136°C, white solid. IR (KBr disk): (3272.91 (NH amid group)), (3100.26-3029.84 (CH aromatic)), (2930.78-2854.42 (CH aliphatic)), (1727.87 (C=O ester)), (1655.64 (C=O amid)), (1612.47-1458.08 (C=C aromatic)), (1274.32 (C-O)) cm-1. 1H NMR (499 MHz, DMSO-*d*6) δ (9.23 (s, 1H)H6’), (8.86 (d, *J* = 42.6 Hz, 3H)H3’,H2’), (8.07 (d, *J* = 7.6 Hz, 1H) NH), (7.39 (t, *J* = 7.2 Hz, 1H) H6, (7.17 – 6.85 (m, 3H)(H3,H4,,H5), (6.46 (s, 1H)CH group, (3.81 (s, 3H)H(ome)[O]), (3.60 (s, 1H) H1”), (1.85 – 1.41 (m, 6H)H2”,H6”,H4”), (1.18 (q, *J* = 52.4, 18.1, 11.3, 10.6 Hz, 3H)H3”H5”).13C NMR (126 MHz, dmso) δ 165.98, 162.79, 157.16, 148.15, 145.56, 144.74, 142.56, 130.31, 128.40, 123.24, 120.26, 111.25, 70.90, 55.51, 47.70, 39.02, 31.89, 24.96, 24.34.


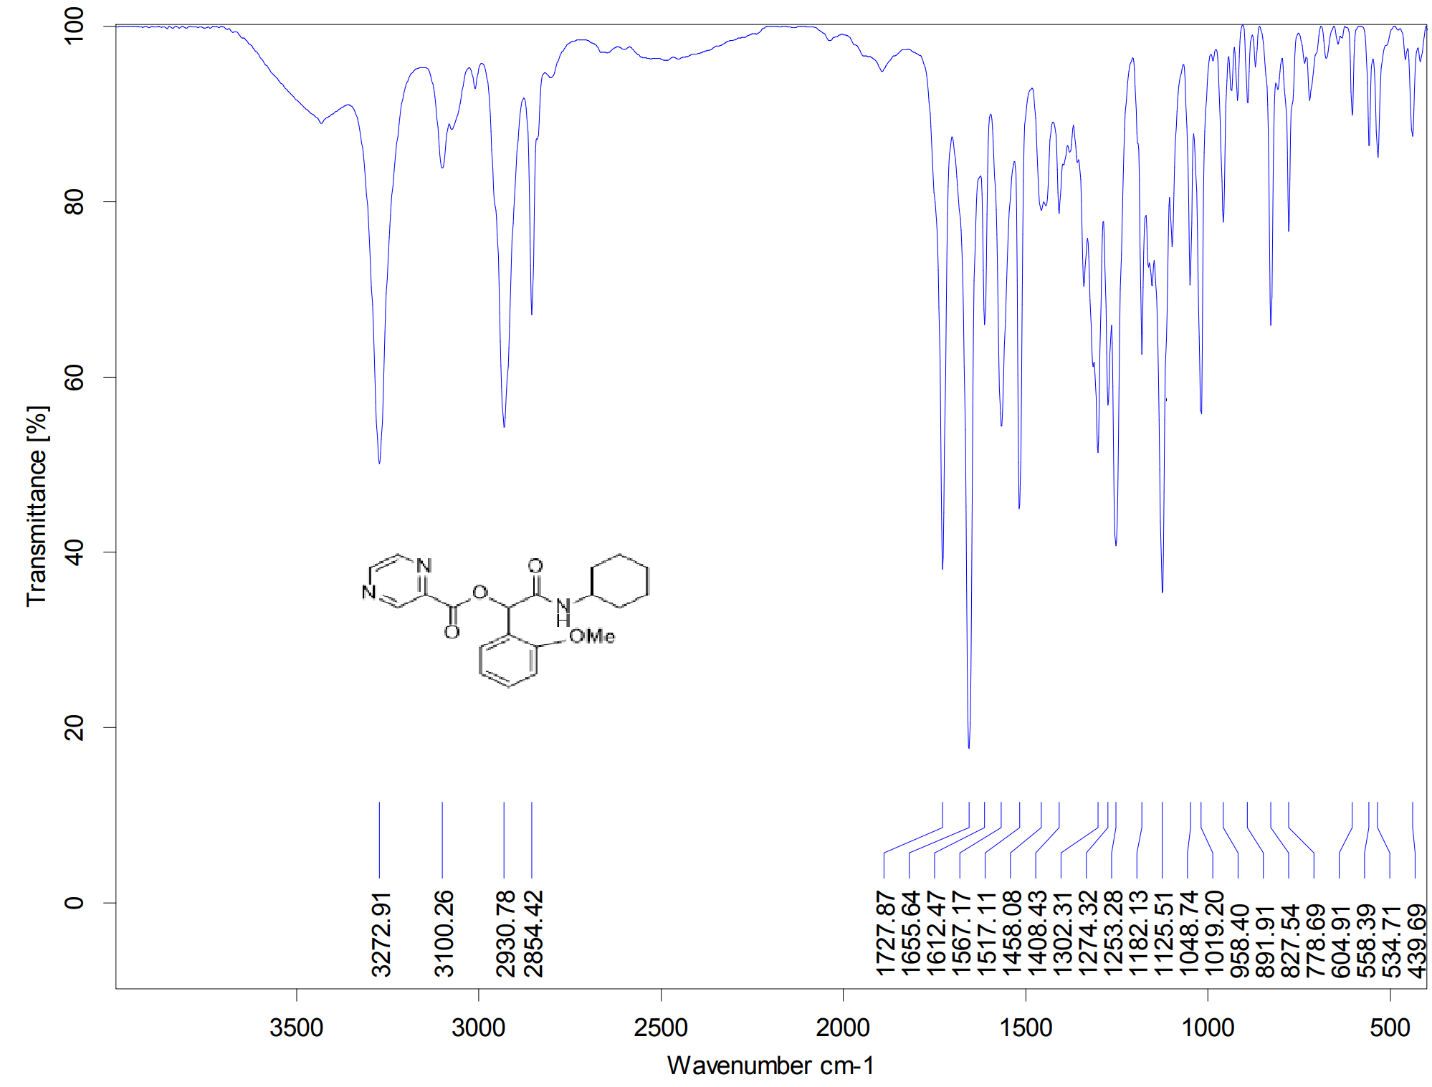


**Figure S1**. IR spectrum of **P1**


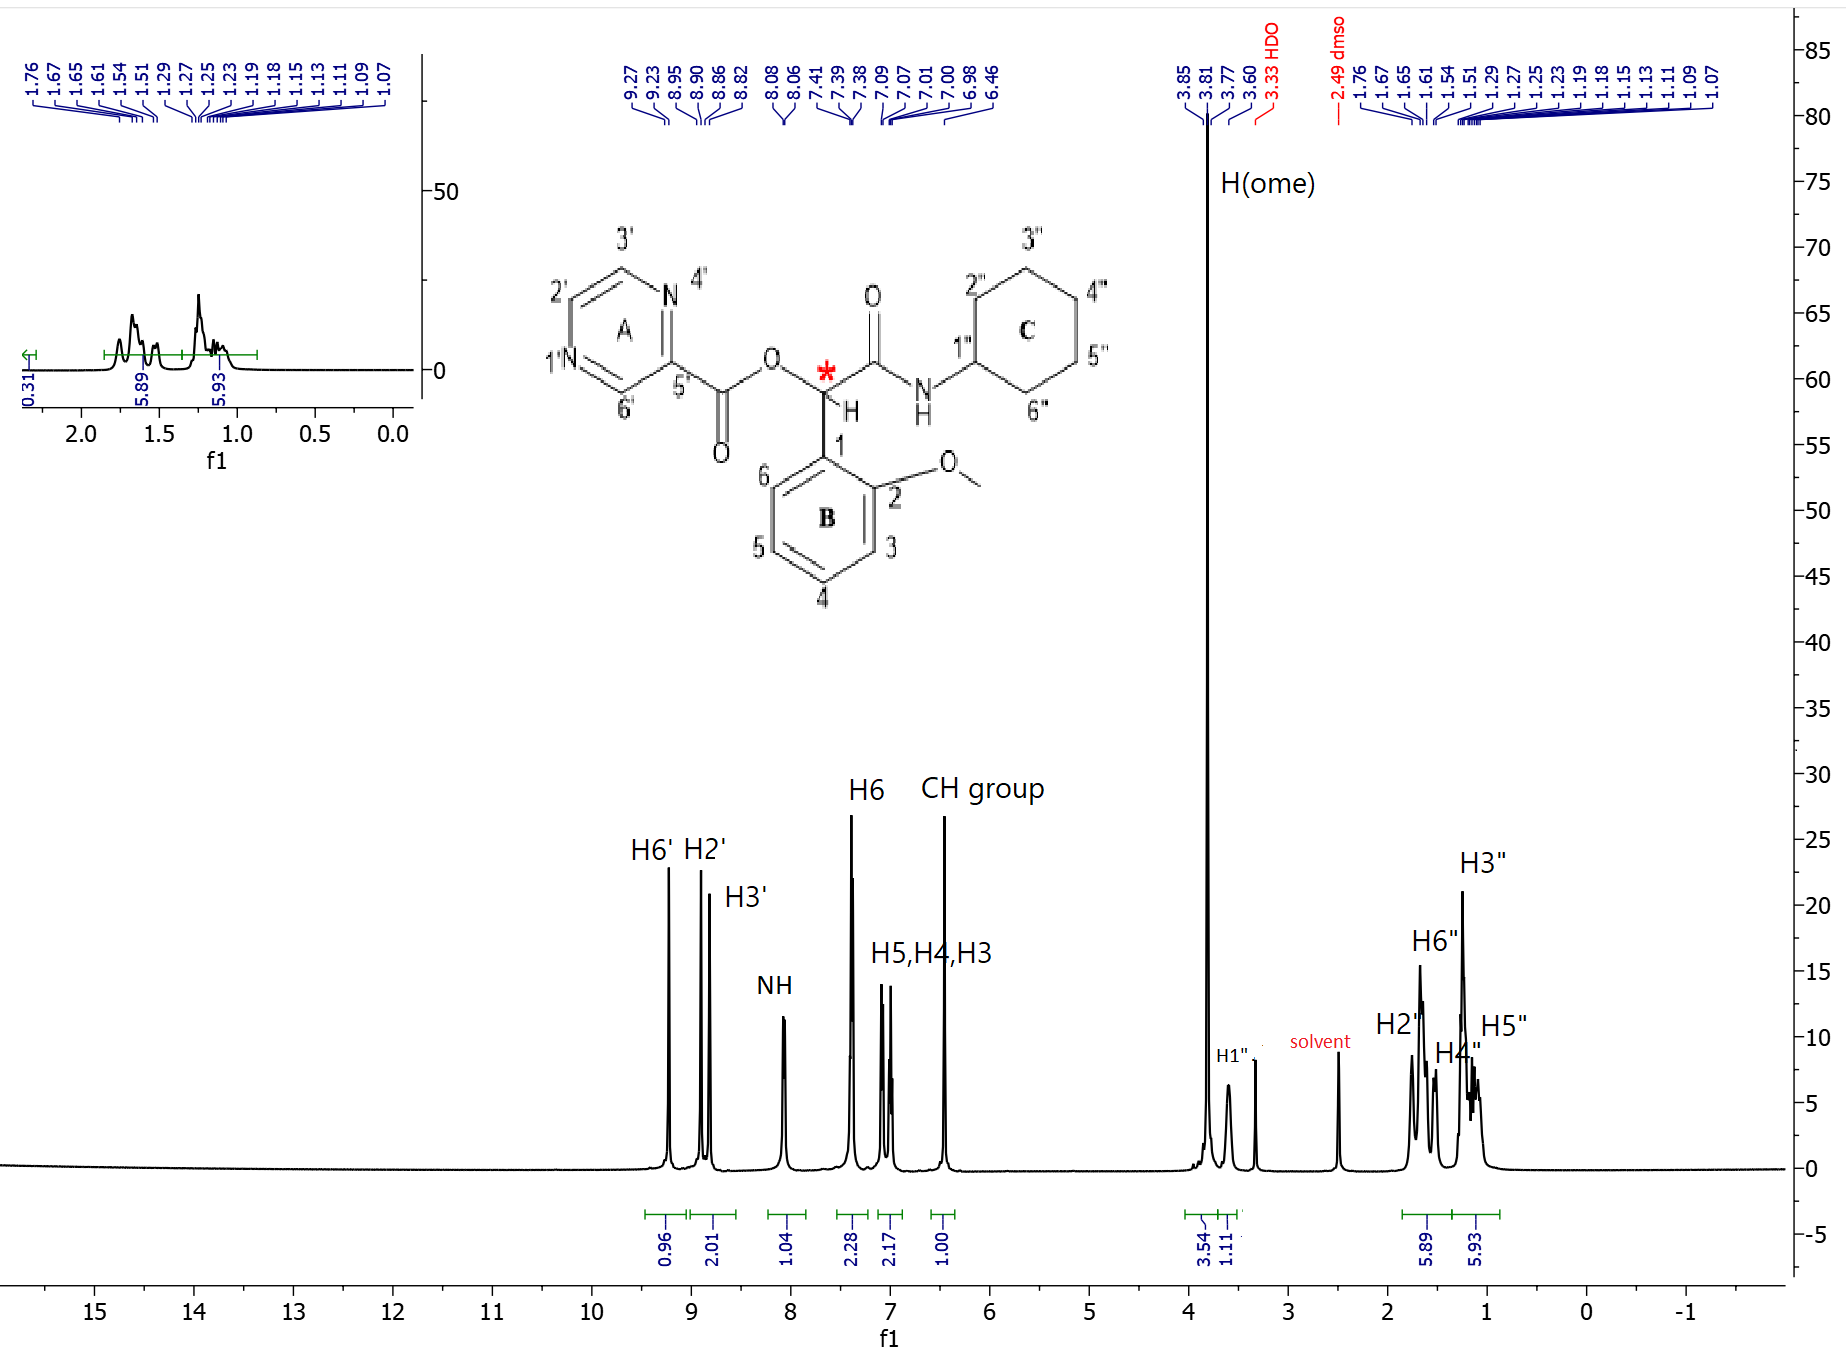


**Figure S2**. 1H-NMR spectrum of **P1**


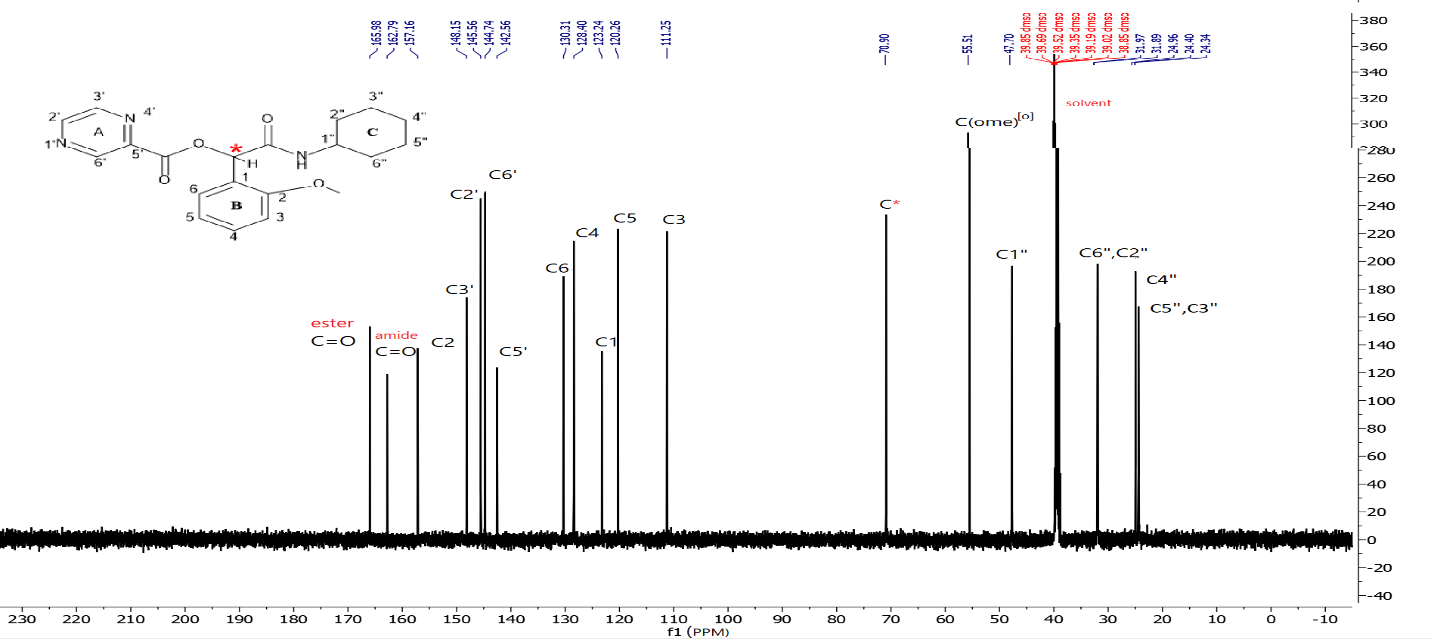


**Figure S3**. 13C-NMR spectrum of **P1**

**2-(cyclohexylamino)-1-(3-methoxyphenyl)-2-oxoethyl pyrazine-2-carboxylate(P2)**


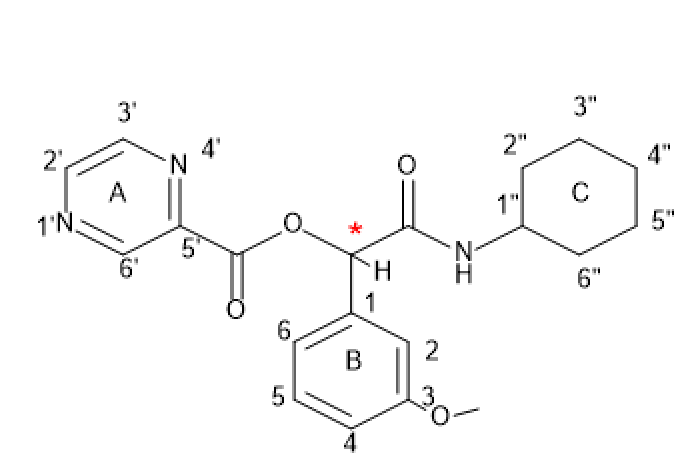


**P2**

Yield: 80%, mp: 173-175°C, white solid. IR (KBr disk): (3272.91 (NH amid group)), (3100.26-3029.84 (CH aromatic)), (2930.78-2854.42 (CH aliphatic)), (1727.87 (C=O ester)), (1655.64 (C=O amid)), (1612.47-1458.08 (C=C aromatic)), (1274.32 (C-O)) cm-1. 1H NMR (499 MHz, DMSO-*d*6) δ (9.30 (s, 1H) H6’ , (8.90 (dd, *J* = 35.3, 1.7 Hz, 3H)H3’,2’), (8.27 (d, *J* = 7.6 Hz, 1H) NH), (7.35 (t, *J* = 8.0 Hz, 2H) H5), (7.17 (d, *J* = 7.4 Hz, 2H) H2), (7.04 – 6.88 (m, 2H)H4,6), (6.09 (s, 1H) CH*), (3.77 (s, 1H) H1”), (3.52 (s, 1H) H1”), (1.85 – 1.41 (m,5H) H2”,4”,6”), (1.35 – 0.98 (m, 4H) H5”,3”). 13C NMR (126 MHz, dmso) δ 166.74, 163.22, 159.65, 148.85, 146.29, 145.45, 143.14, 137.39, 130.09, 119.95, 114.39, 113.70, 76.65, 55.62, 48.23, 40.50, 40.34, 40.17, 40.00, 39.84, 39.67, 39.50, 32.68, 32.50, 25.59, 24.93, 24.84. Elemental analysis calcd (%) for C20H23N3O4 (369.17):C,65.03; H,6.28; N,11.37;found: C,65.16;H,6.41;N,11.50


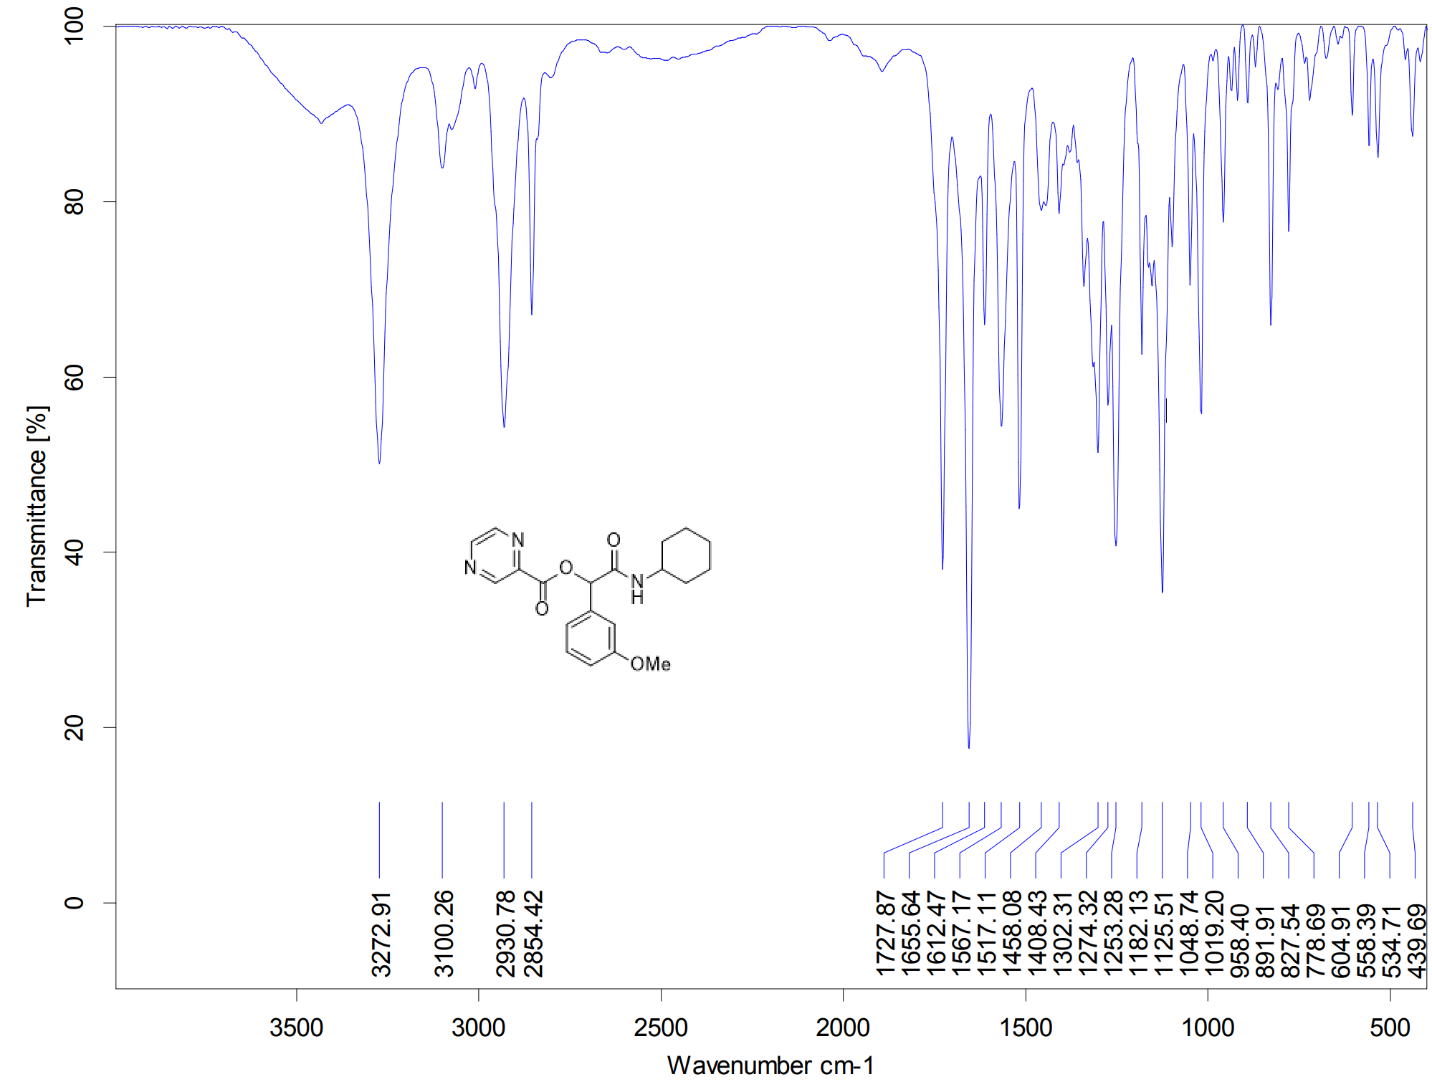


**Figure S4**. IR spectrum of **P2**


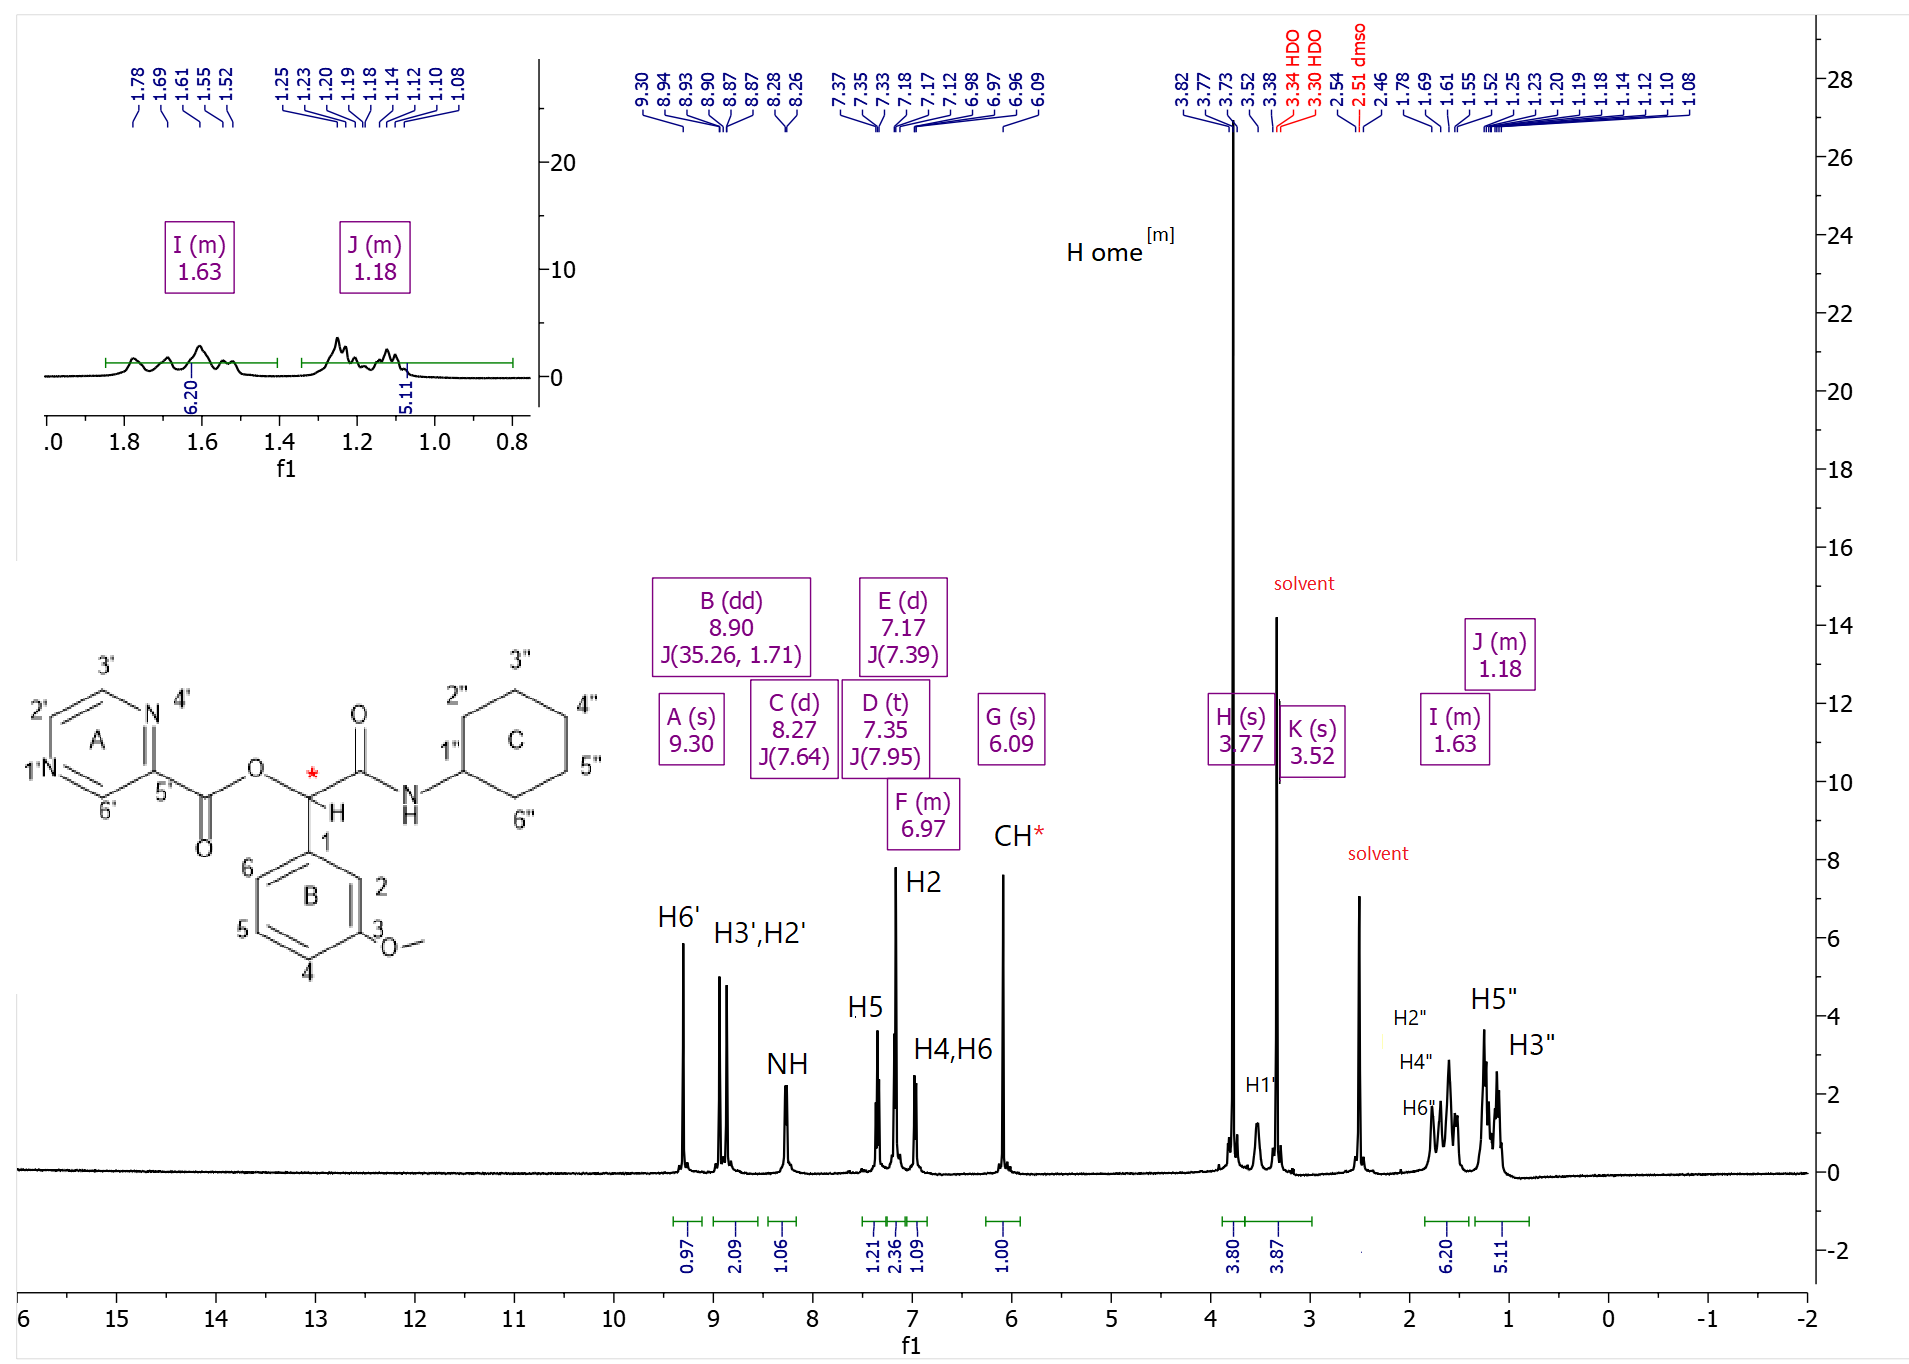


**Figure S5**. 1H-NMR spectrum of **P2**


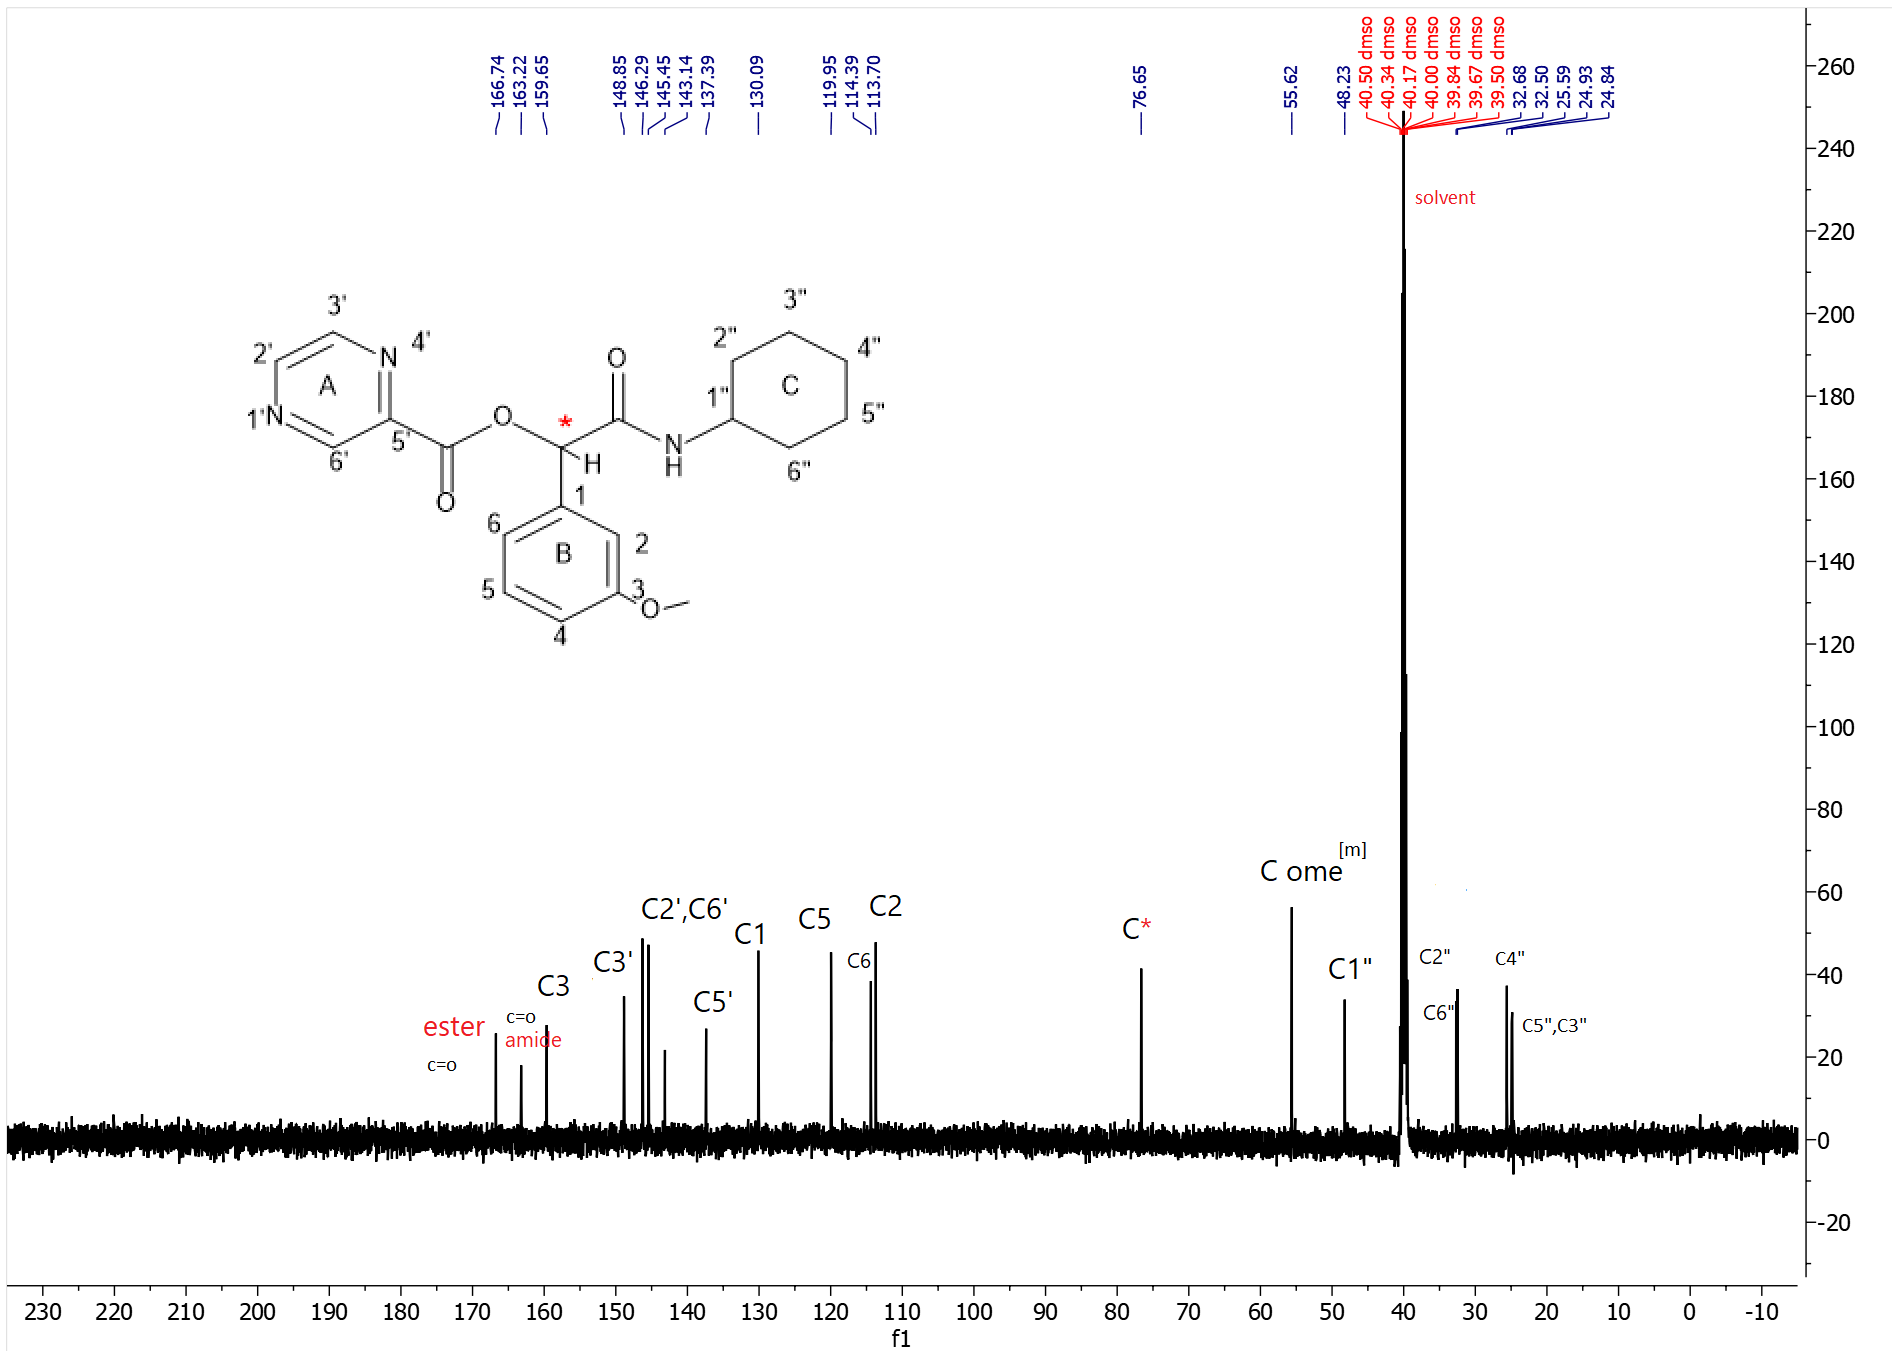


**Figure S6**. 13C-NMR spectrum of **P2**


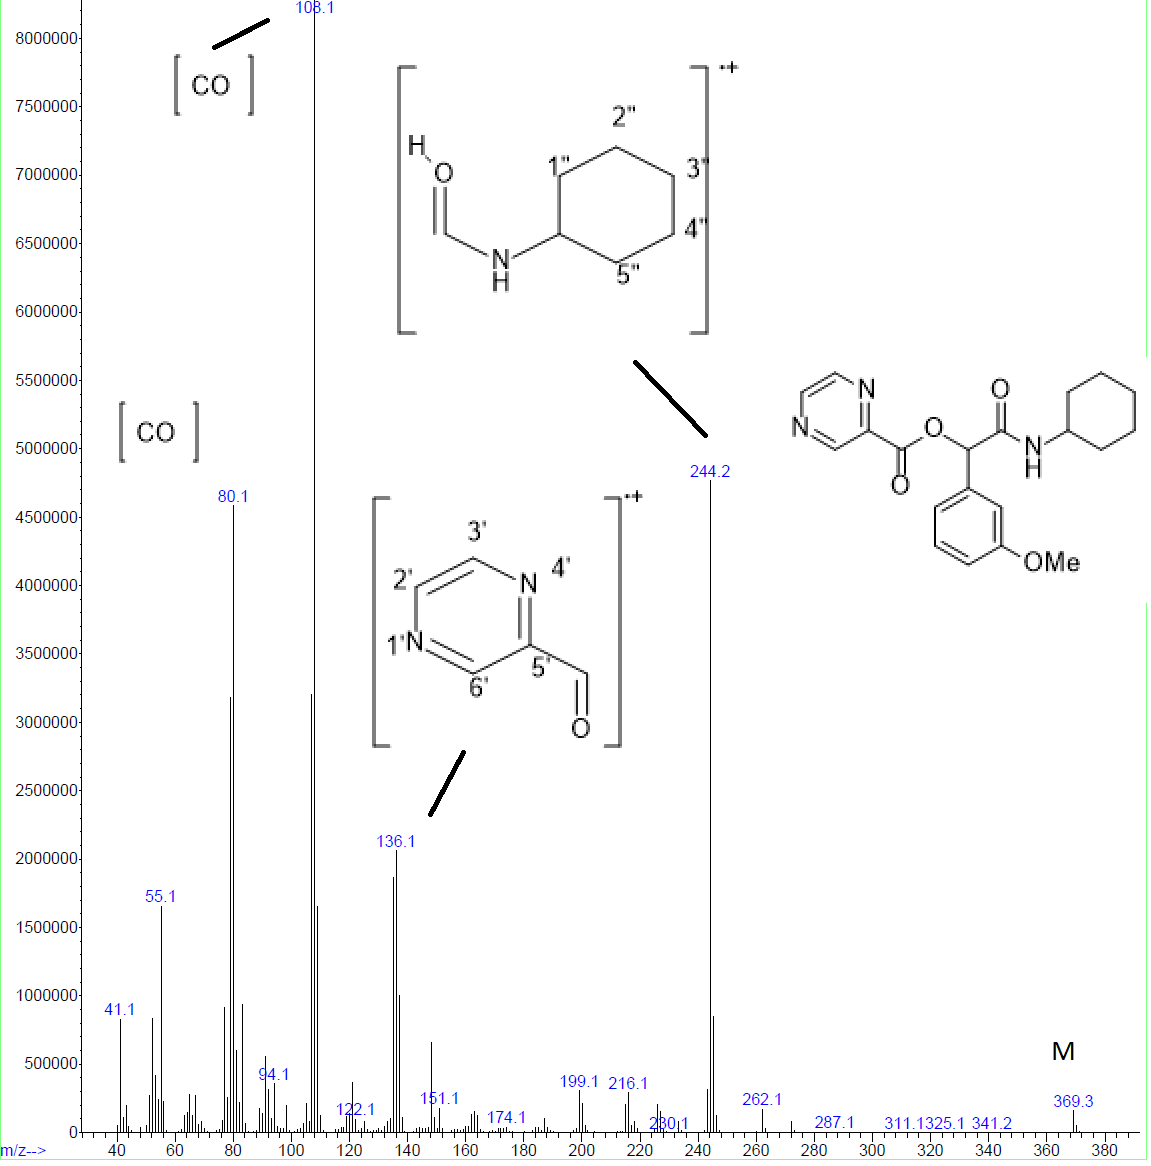


**Figure S7**. Mass spectrum of **P2**

**2-(cyclohexylamino)-1-(4-methoxyphenyl)-2-oxoethyl pyrazine-2-carboxylate(P3)**


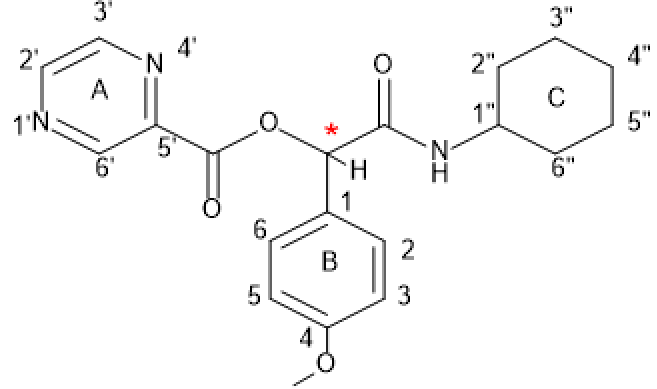


**P3**

Yield: 83%, mp: 182-184°C, white solid. IR (KBr disk): (3252.47 (NH amid group)), (3080.85-3029.84 (CH aromatic)), (2929.16-2851.53 (CH aliphatic)), (1744.23 (C=O ester)), (1656.08 (C=O amid)), (1603.72-1463.43 (C=C aromatic)), (1261.32 (C-O)) cm-1. 1H NMR (300 MHz, DMSO-d6) δ (9.21 (d, *J* = 29.2 Hz, 1H) H6’), (8.98 – 8.58 (m, 4H) H3,H2’), ( 8.21 (d, *J* = 7.4 Hz, 1H)NH) , (7.50 (d, *J* = 8.3 Hz, 2H)H2,H6) , (6.97 (d, *J* = 8.3 Hz, 2H) H5,H3) , (6.05 (s, 1H) CH* group) , (3.50 (s, 3H) H ome[P]), (1.86 – 1.38 (m, 6H) H1”,2”,4”,6”) , (1.36 – 0.77 (m, 3H) H5”,3”. 13C NMR (75 MHz, DMSO) δ 166.65, 162.83, 159.57, 148.33, 145.78, 145.53, 144.95, 144.49, 142.73, 129.03, 127.47, 113.84, 76.07, 55.19, 47.71, 40.33, 40.05, 39.77, 39.49, 39.21, 38.93, 38.65, 32.23, 25.12, 24.48.


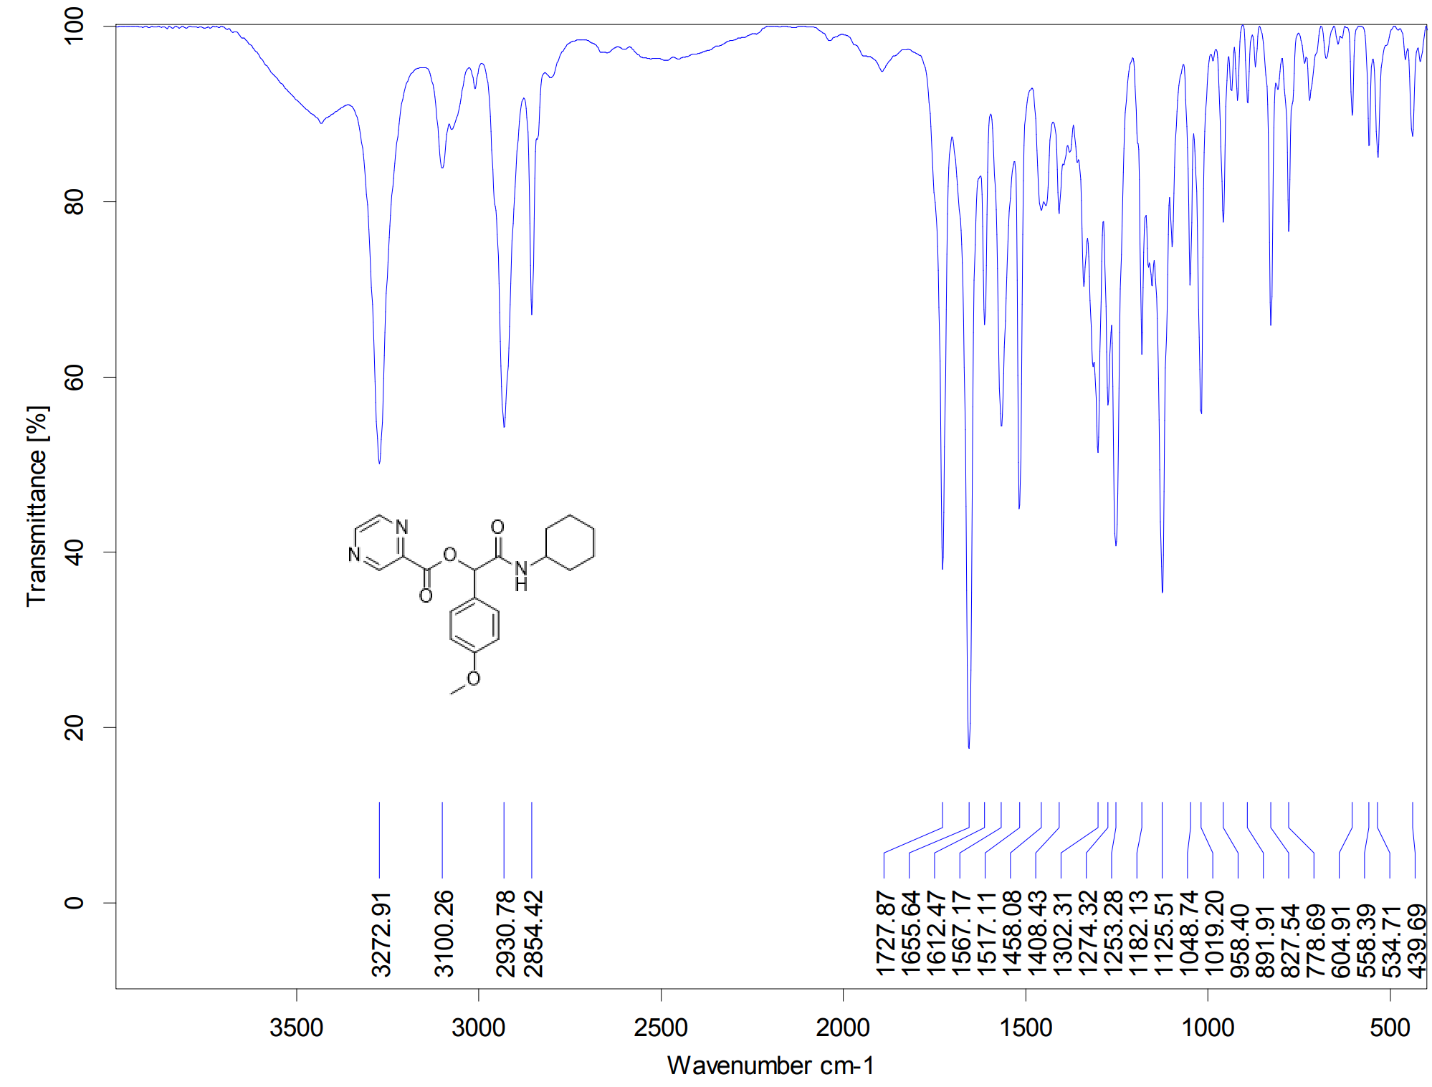


**Figure S8**. IR spectrum of **P3**


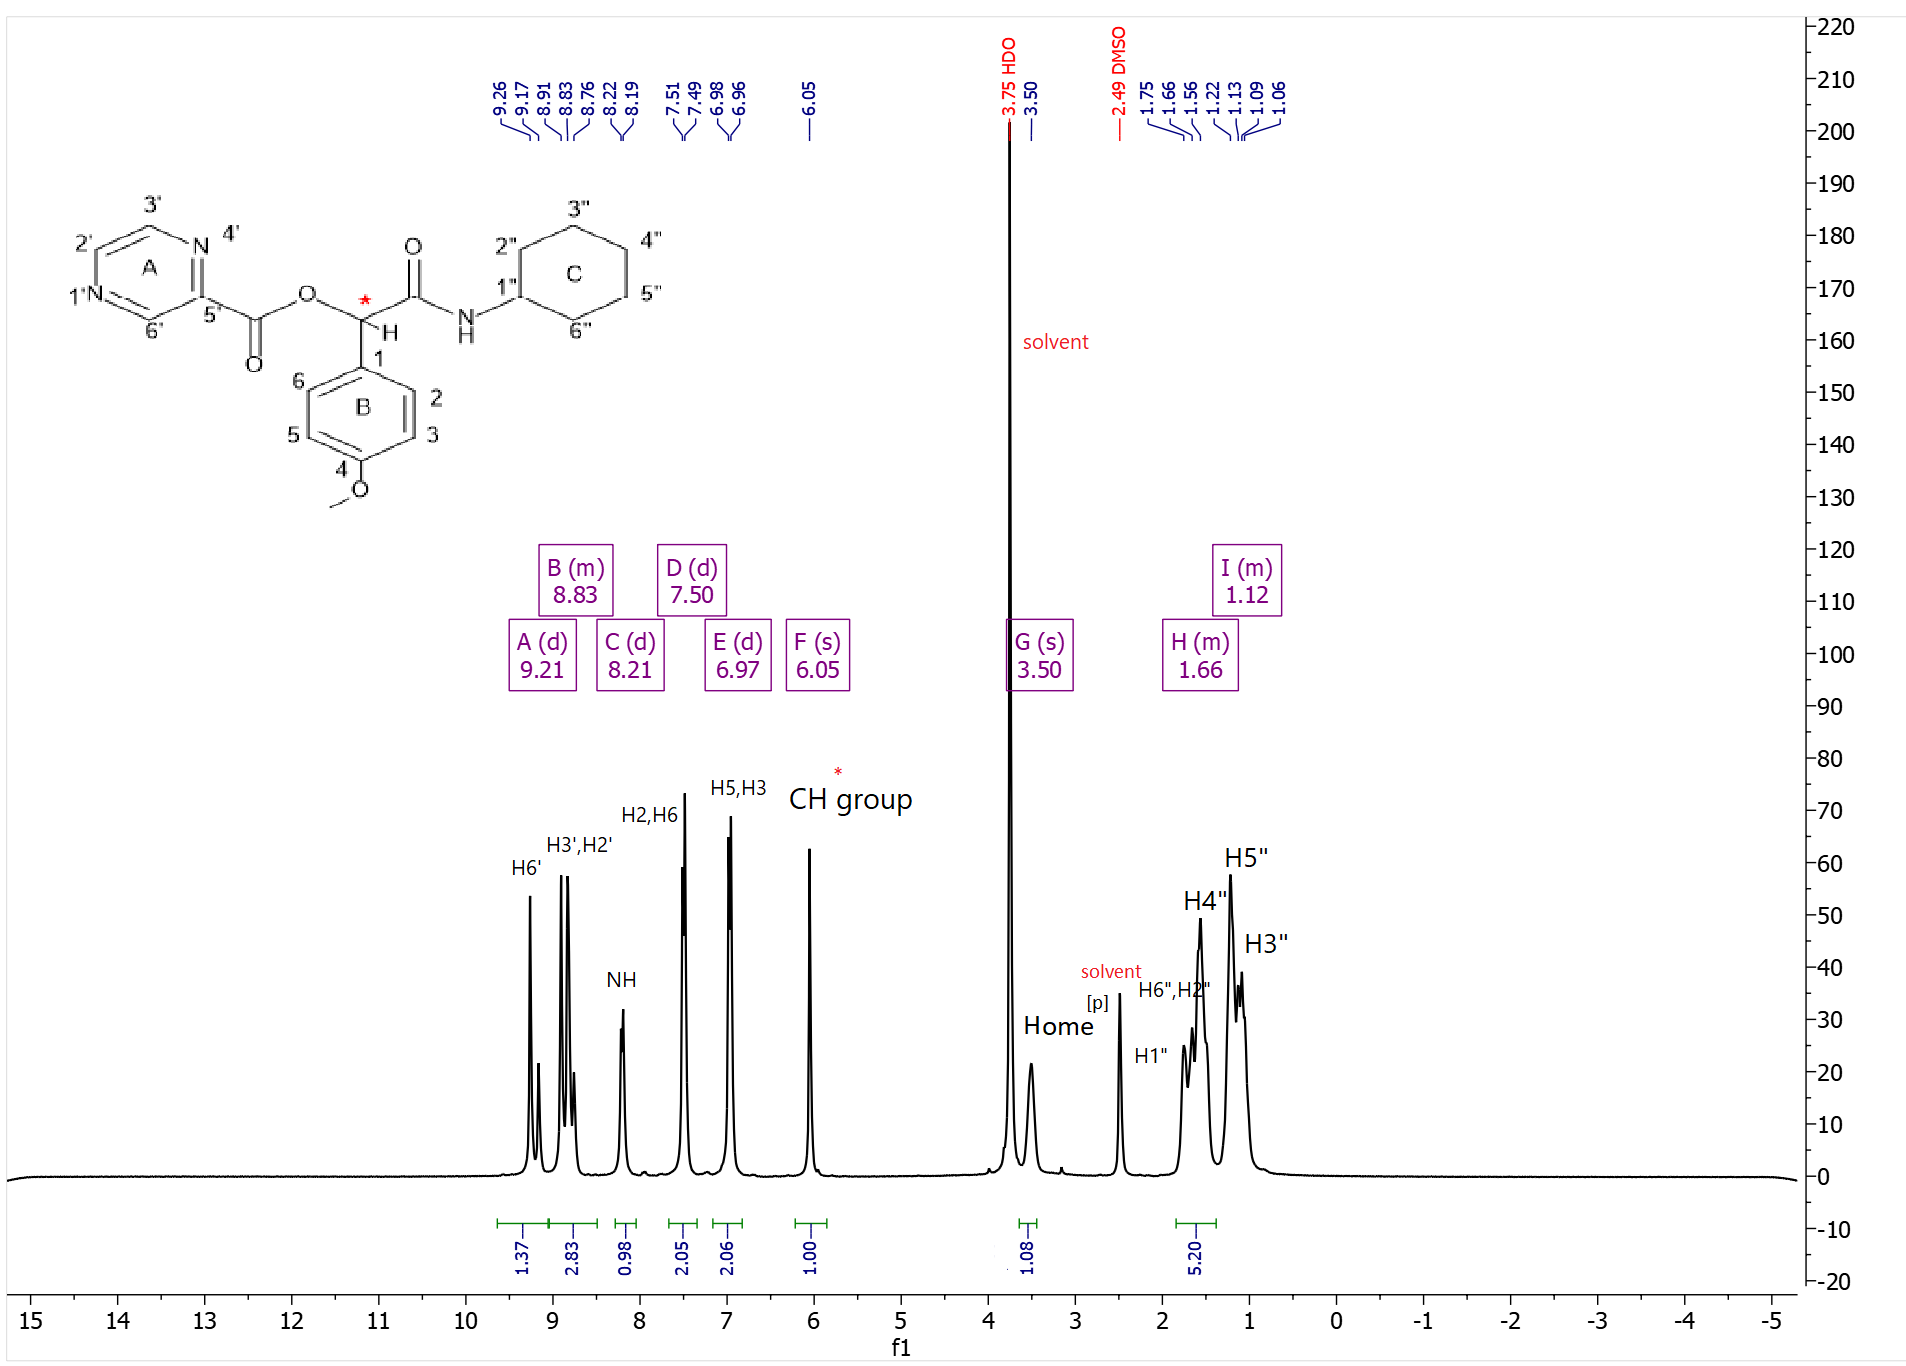


**Figure S9**. 1H-NMR spectrum of **P3**


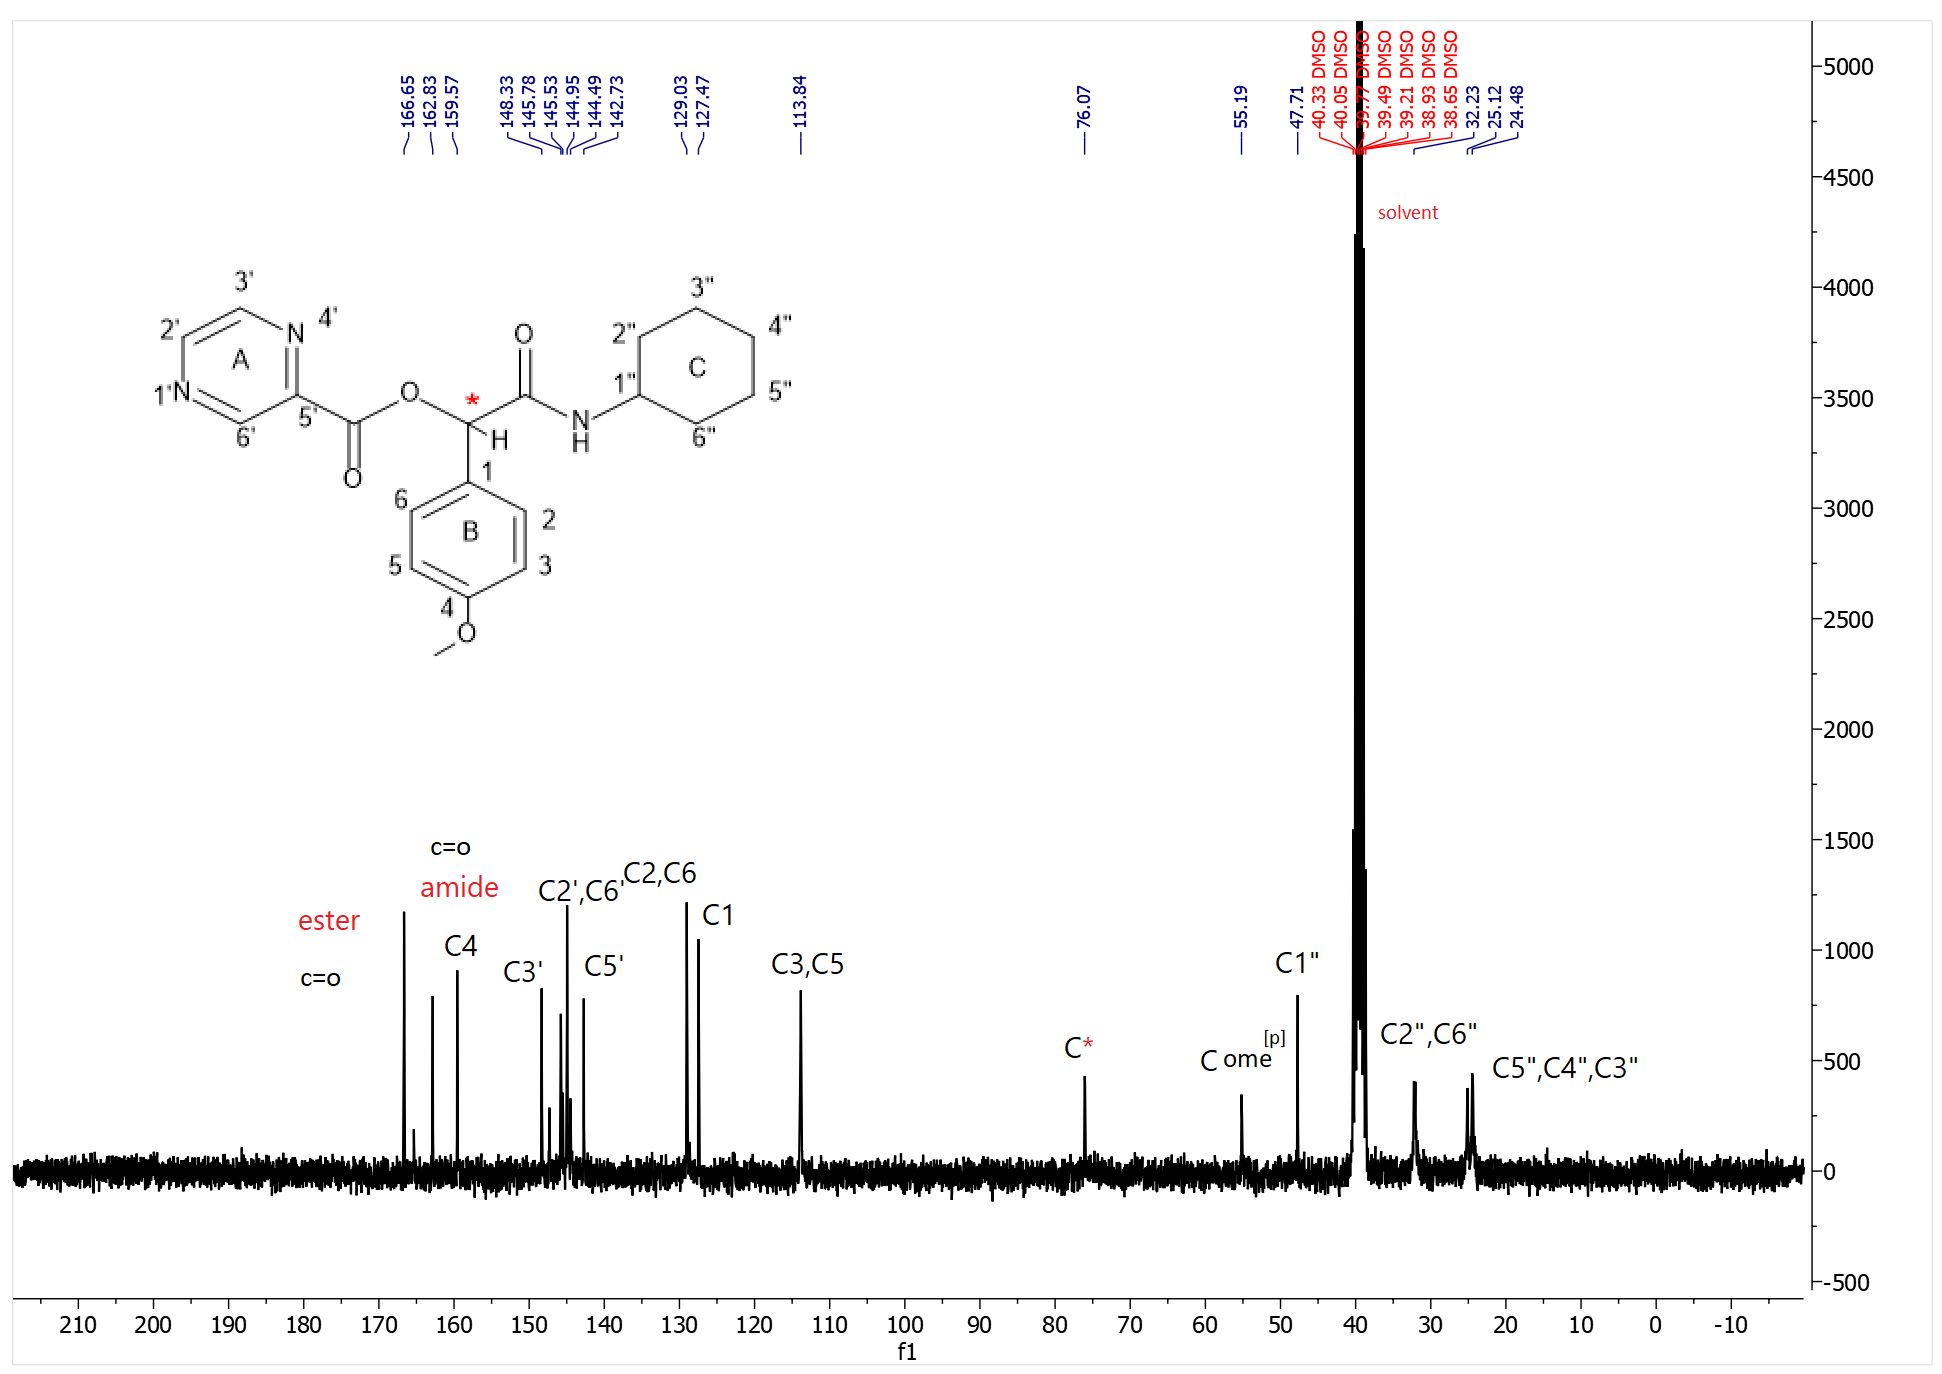


**Figure S10**. 13C-NMR spectrum of **P3**

**2-(cyclohexylamino)-1-(3,4-dimethoxyphenyl)-2-oxoethyl pyrazine-2-carboxylate(P4)**


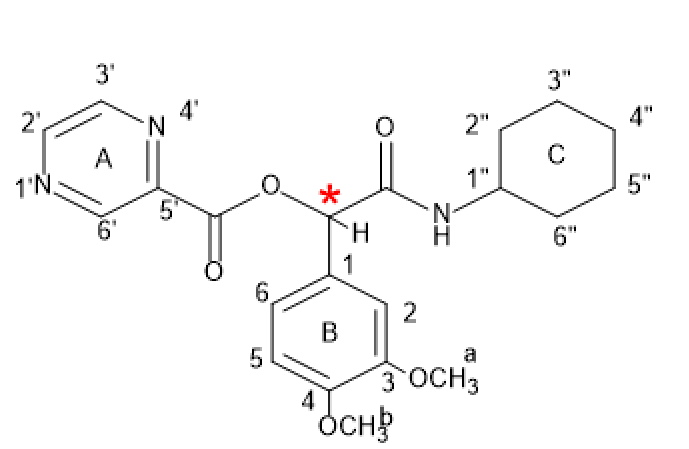


**P4**

Yield: 47%, mp: 192-193°C, white solid. IR (KBr disk): (3266.25 (NH amid group)), (3098.33-3029.84 (CH aromatic)), (2928.16-2852.96 (CH aliphatic)), (1746.36 (C=O ester)), (1655.67 (C=O amid)), (1593.12-1563.43 (C=C aromatic)), (1258.88 (C-O)) cm-1. 1H NMR (499 MHz, DMSO-d6) δ (9.28 (s, 1H) h6’, (8.88 (d, *J* = 36.9 Hz, 2H) H3’,2’) , (8.18 (d, *J* = 7.7 Hz, 1H) NH), (7.26 – 7.04 (m, 3H) H2,5), (6.99 (d, *J* = 8.2 Hz, 1H) H6), (6.04 (s, 1H) CH*), (3.76 (s, 6H) H ome[a,b]), (3.33 (s, 1H) H1”), (1.90 – 1.43 (m, 6H) H2”,4”,6”, (1.33 – 0.85 (m,3H) H5”,3”). 13C NMR (126 MHz, dmso) δ 167.01, 163.26, 149.68, 148.99, 148.77, 146.25, 145.41, 143.22, 128.14, 120.71, 112.05, 111.82, 76.75, 56.02, 55.99, 48.18, 40.49, 40.32, 40.15, 39.98, 39.82, 39.65, 39.48, 32.67, 32.52, 25.59, 24.95, 24.87. Elemental analysis calcd (%) for C21H25N3O5 (399.18):C,63.14; H,6.31; N,10.52;found: C,63.26;H,6.43;N,10.64.


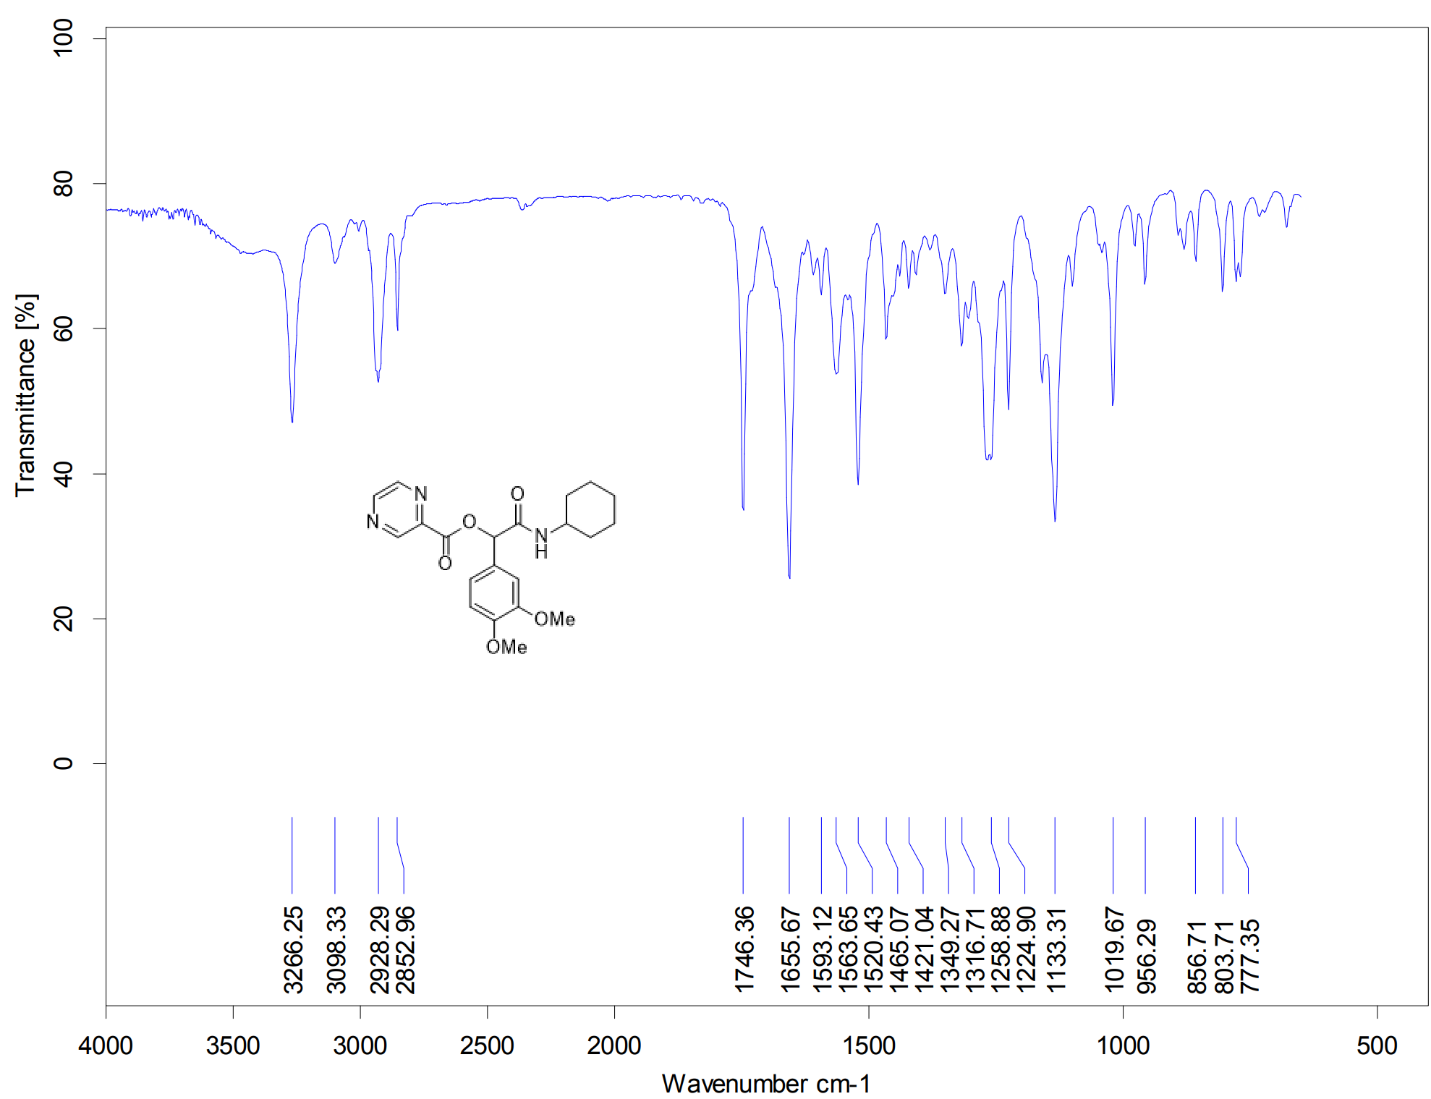


**Figure S11**. IR spectrum of **P4**


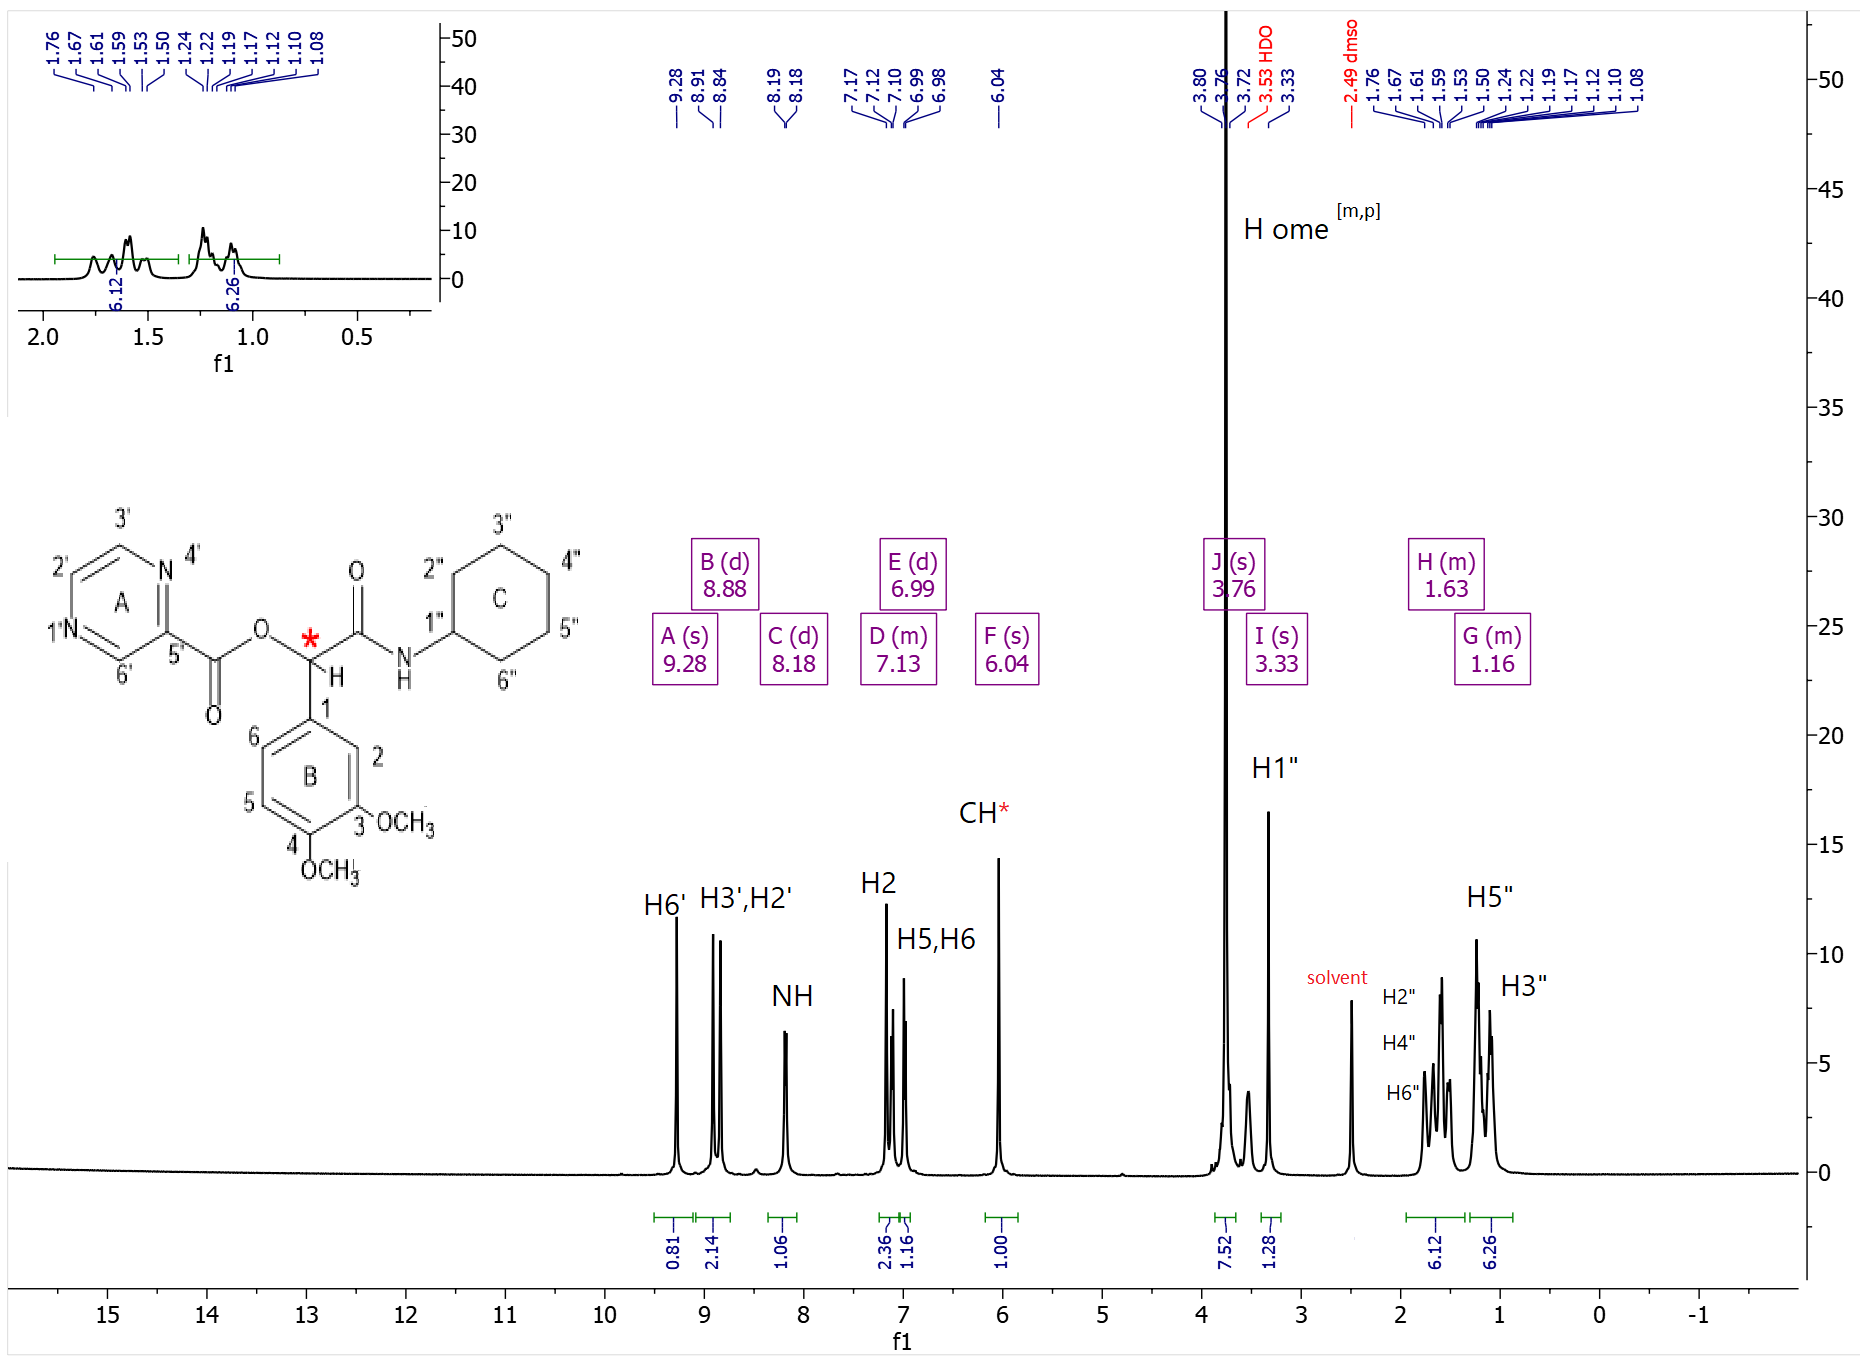


**Figure S12**. 1H-NMR spectrum of **P4**


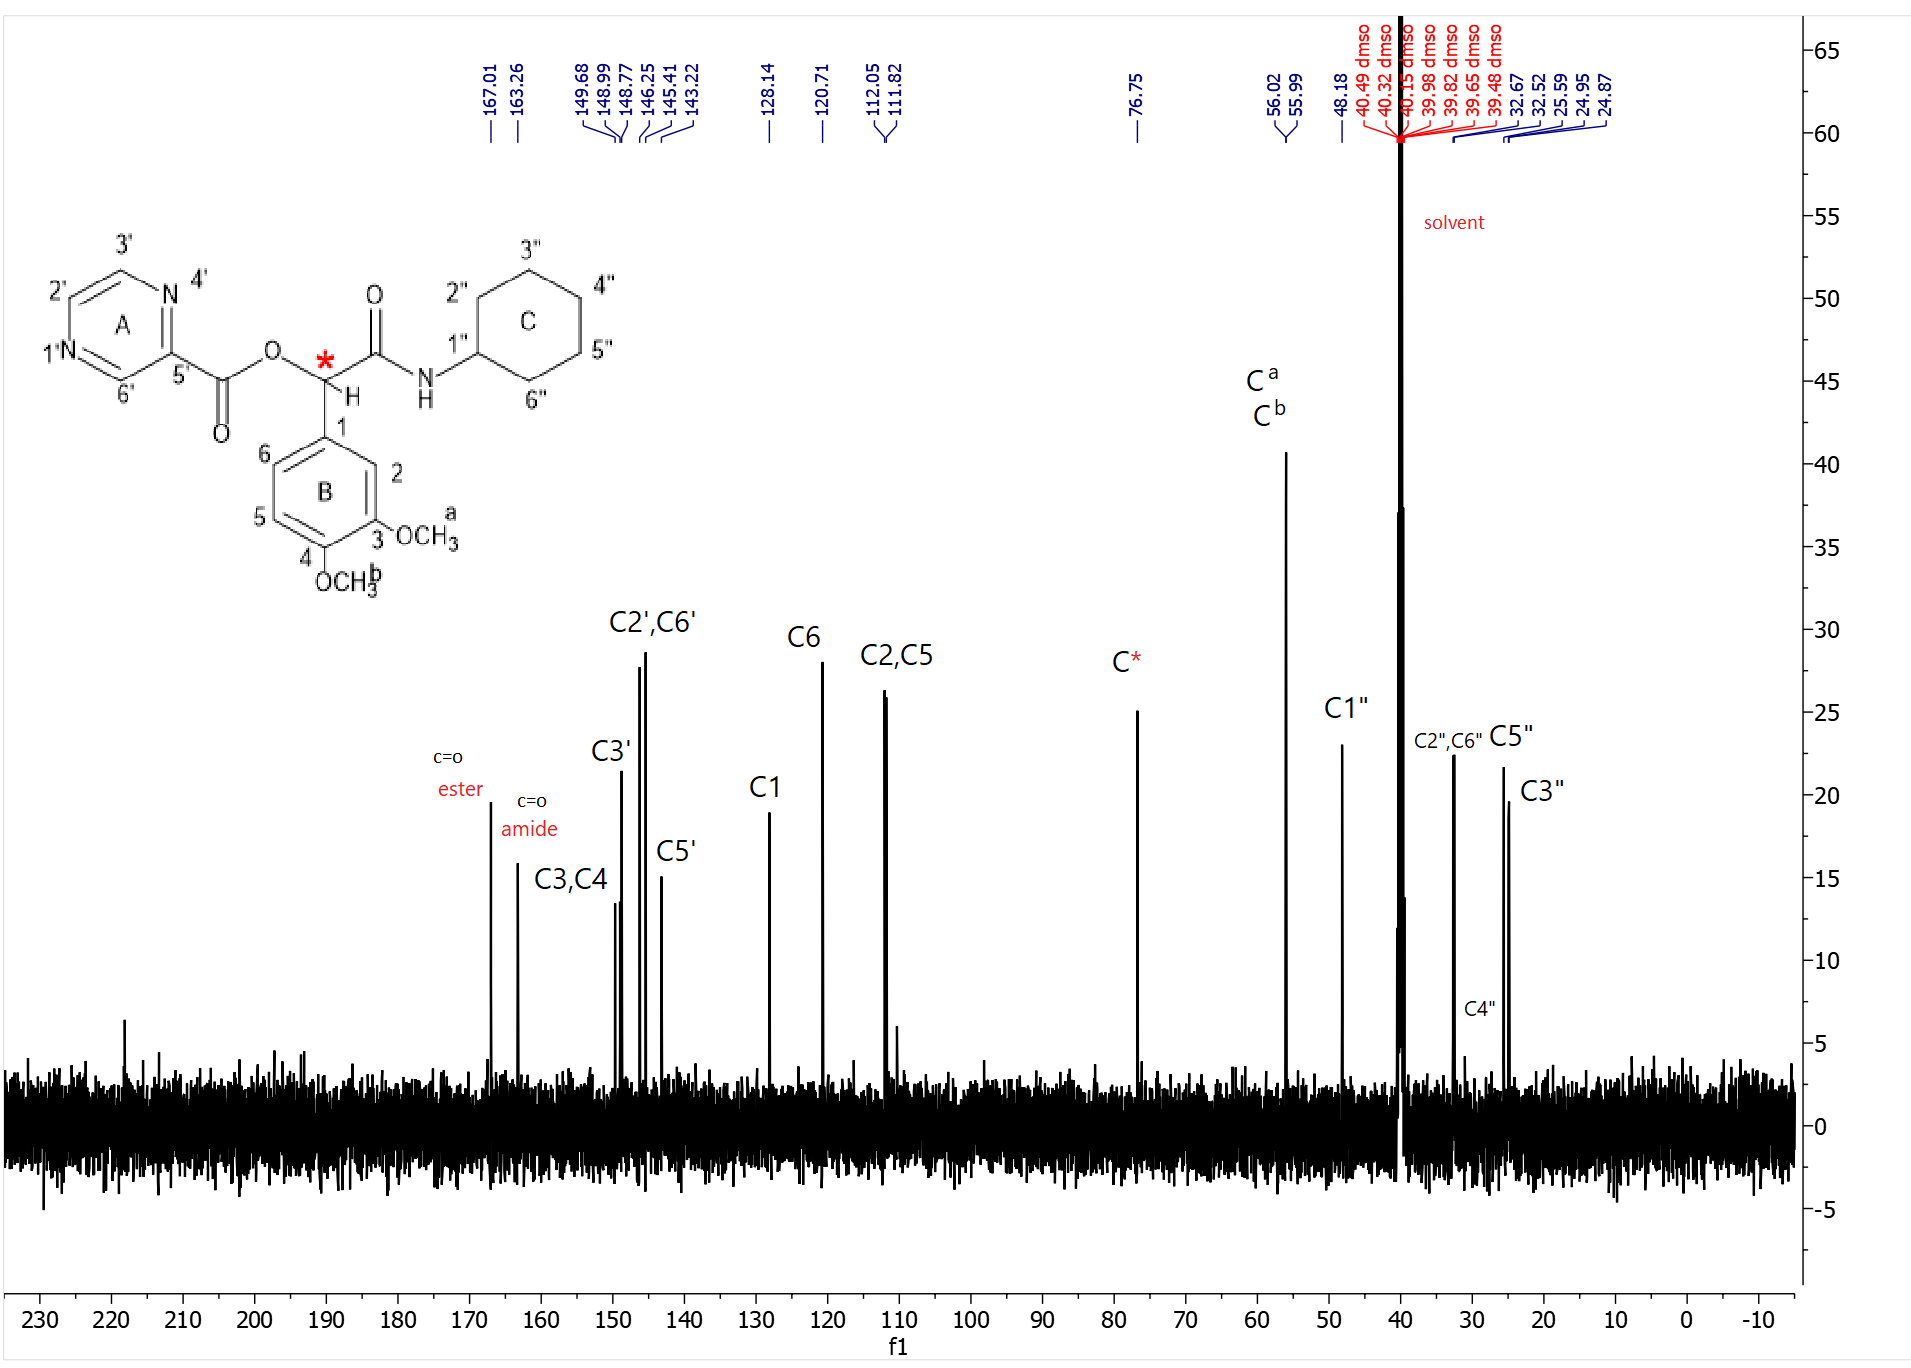


**Figure S13**. 13C-NMR spectrum of **P4**


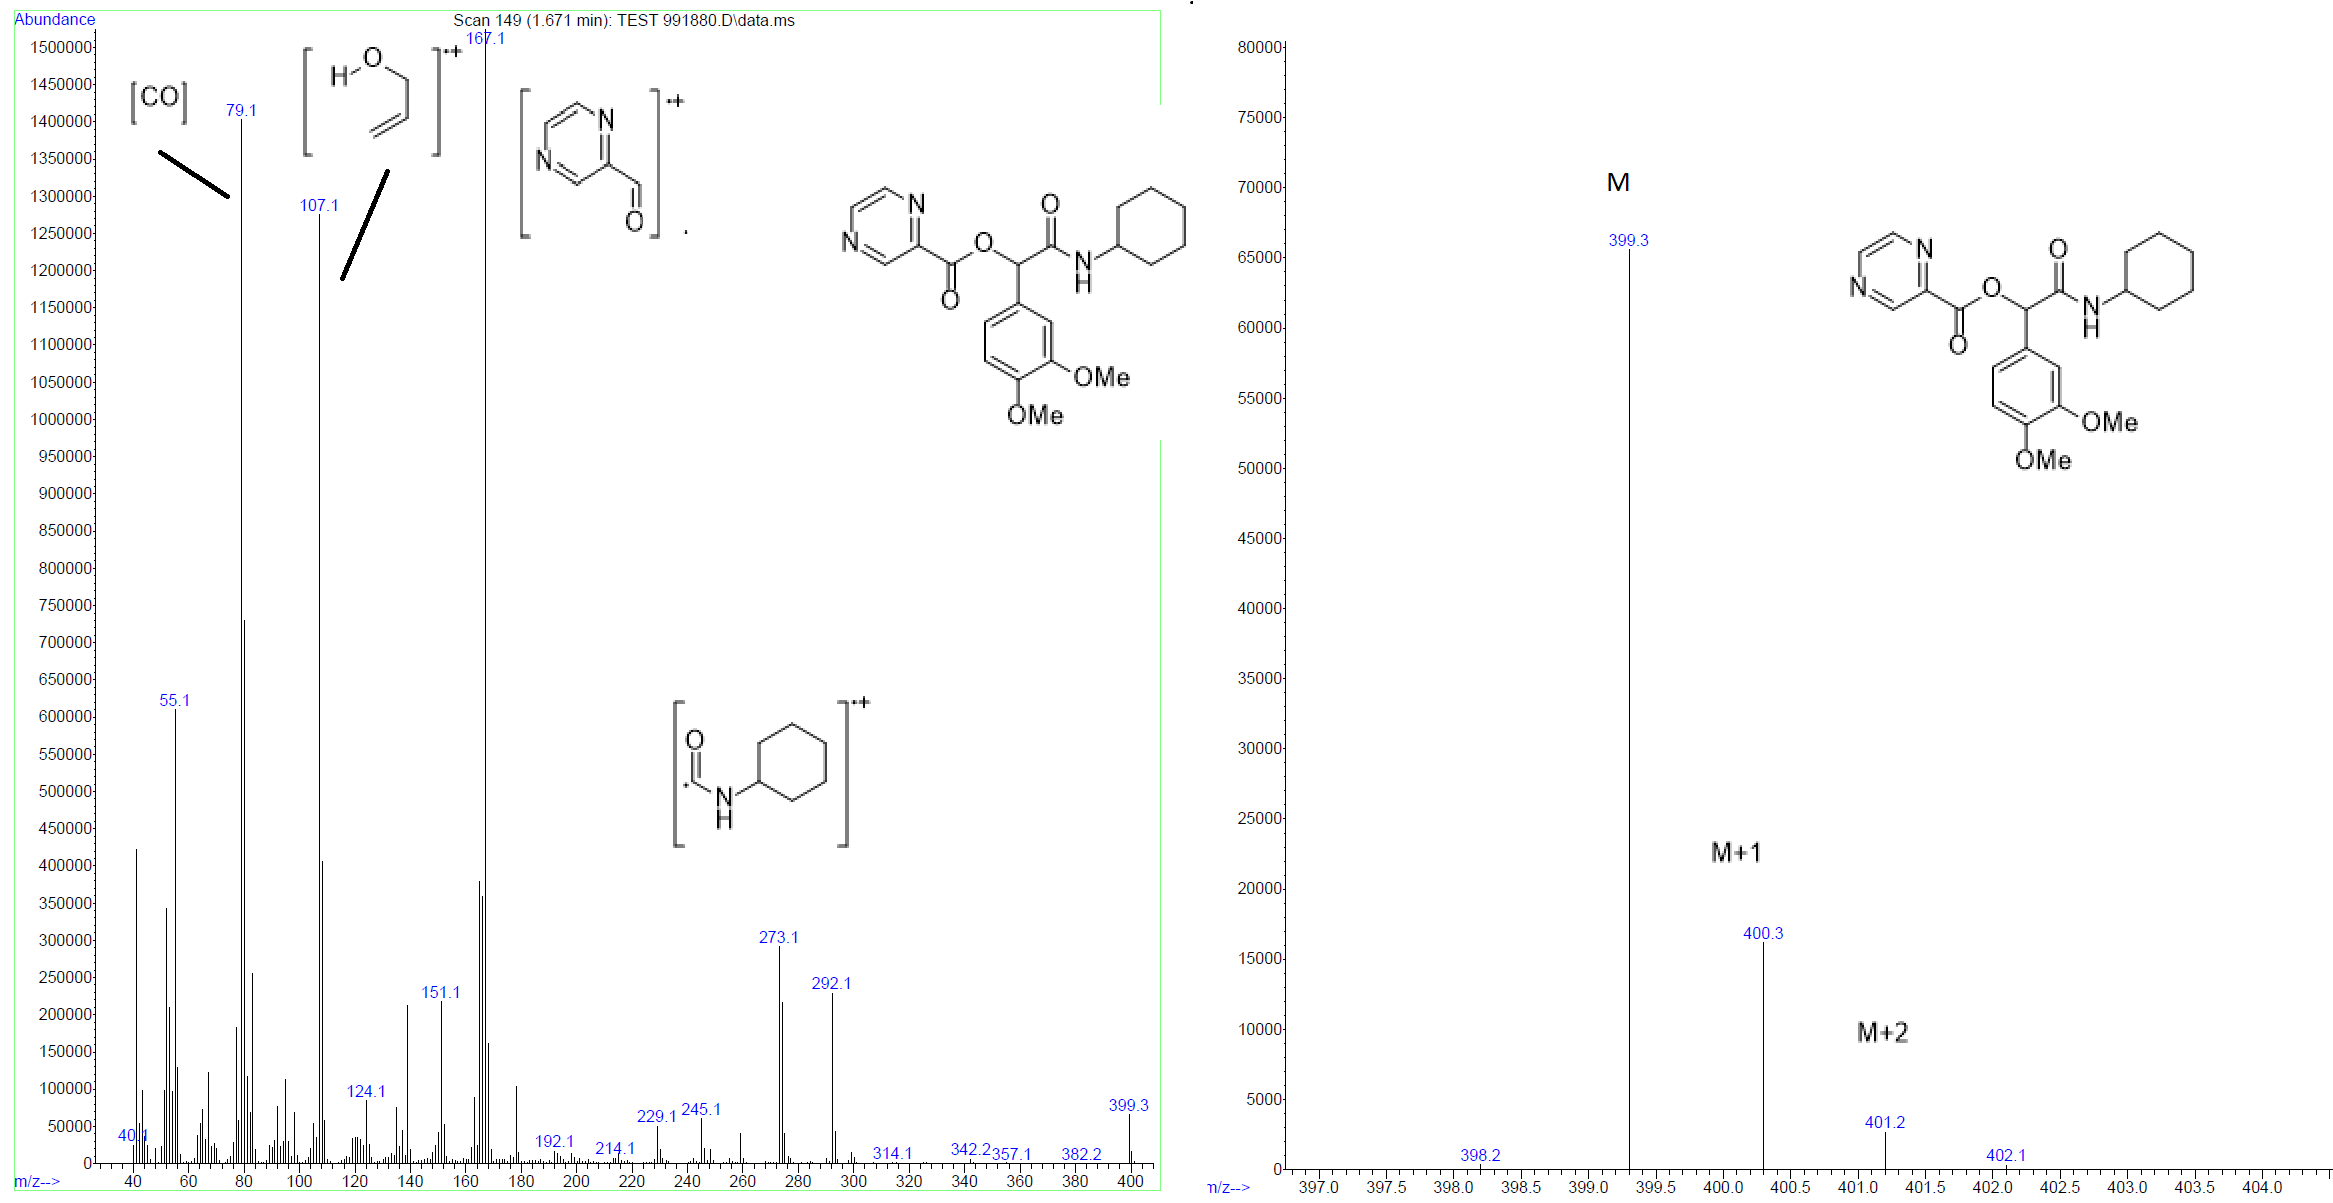


**Figure S14**. Mass spectrum of **P4**

**2-(cyclohexylamino)-1-(2,5-dimethoxyphenyl)-2-oxoethyl pyrazine-2-carboxylate(P5)**


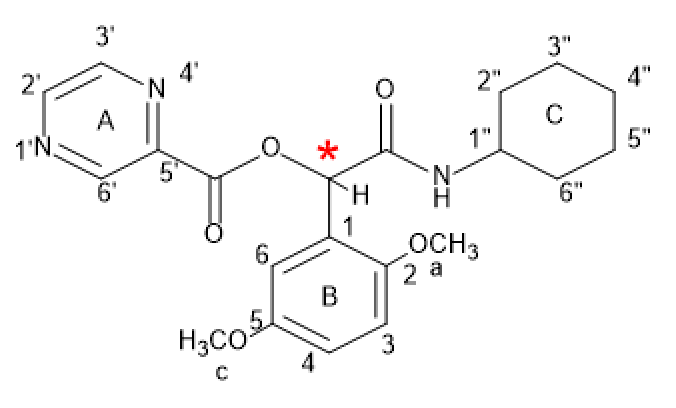


**P5**

Yield: 49%, mp: 114-117°C, white solid. IR (KBr disk): (3266.25 (NH amid group)), (3098.33-3029.84 (CH aromatic)), (2928.16-2852.96 (CH aliphatic)), (1746.36 (C=O ester)), (1655.67 (C=O amid)), (1593.12-1563.43 (C=C aromatic)), (1258.88 (C-O)) cm-1. 1H NMR (300 MHz, DMSO-d6) δ (9.23 (d, *J* = 1.3 Hz, 1H) H6’, (9.02 – 8.73 (m, 2H) H3’,2’), (8.10 (d, *J* = 7.9 Hz, 1H) NH), (7.27 – 6.79 (m, 4H) H4,3,6) , (6.41 (s, 1H) CH*), (3.76 (s, 6H) Ha,c, 3.34 (s, 1H) H1”), (1.84 – 1.43 (m, 5H) H2”,4”,6”), (1.18 (dq, *J* = 29.0, 8.6 Hz, 4H) H5”,3”). 13C NMR (75 MHz, DMSO) δ 166.04, 162.92, 153.00, 151.44, 148.38, 145.79, 144.94, 142.65, 124.28, 114.73, 114.50, 112.62, 70.99, 56.25, 56.19, 55.49, 47.86, 40.33, 40.05, 39.78, 39.50, 39.22, 38.94, 38.67, 32.09, 25.11, 24.55**.**


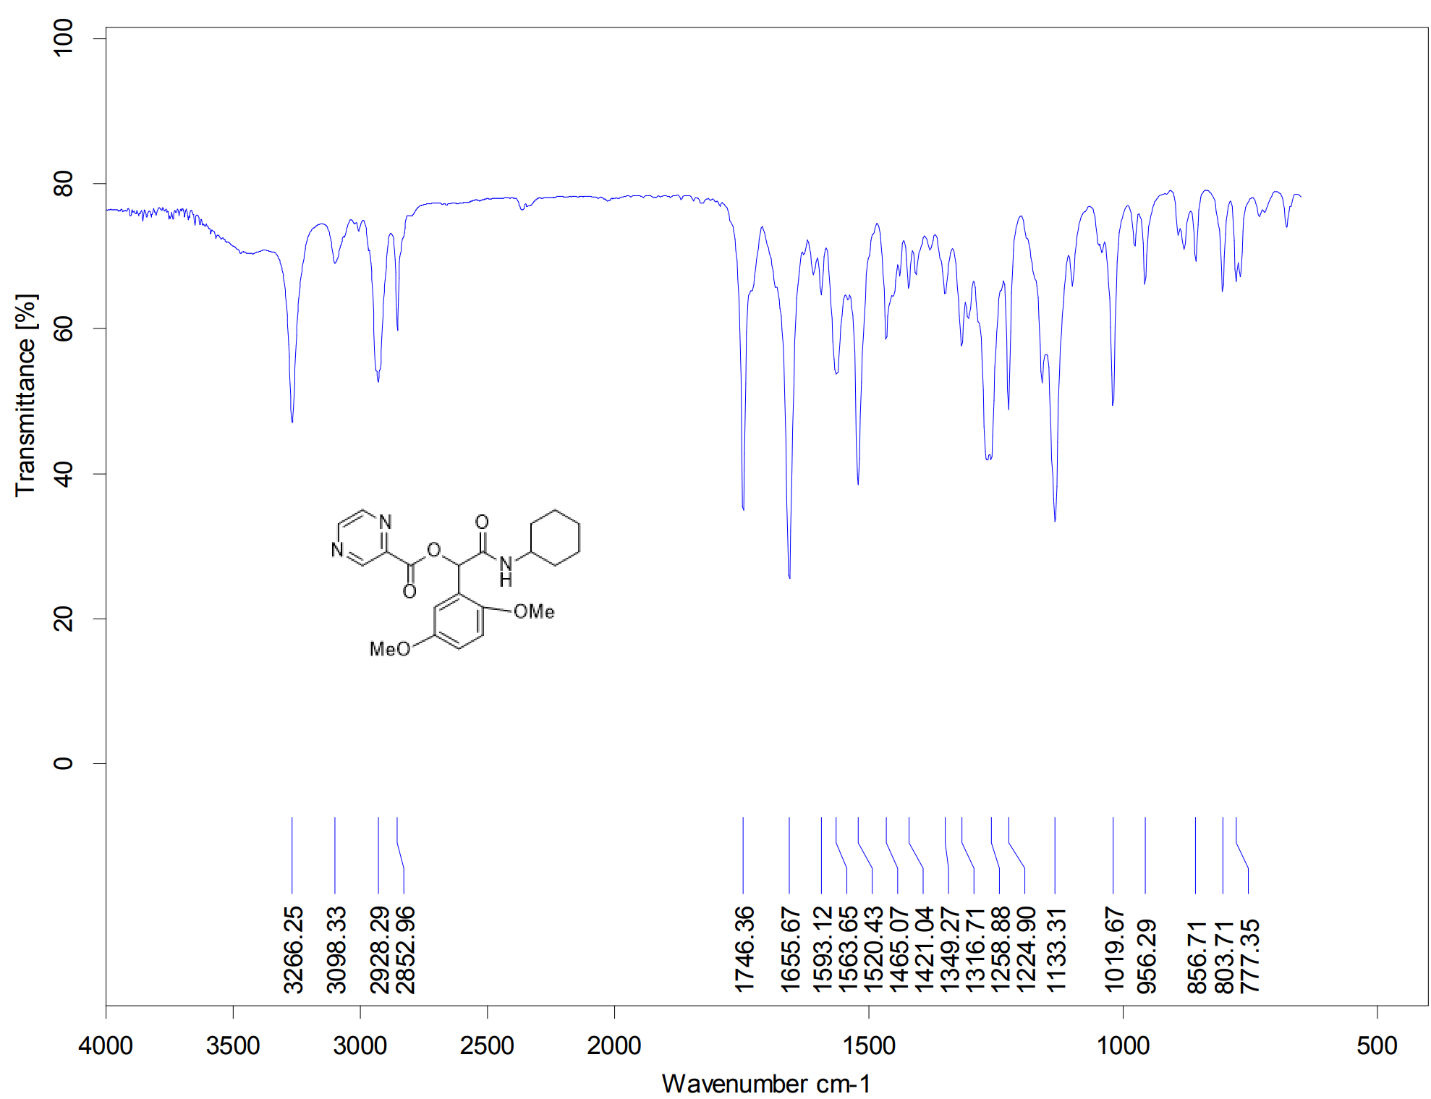


**Figure S15**. IR spectrum of **P5**


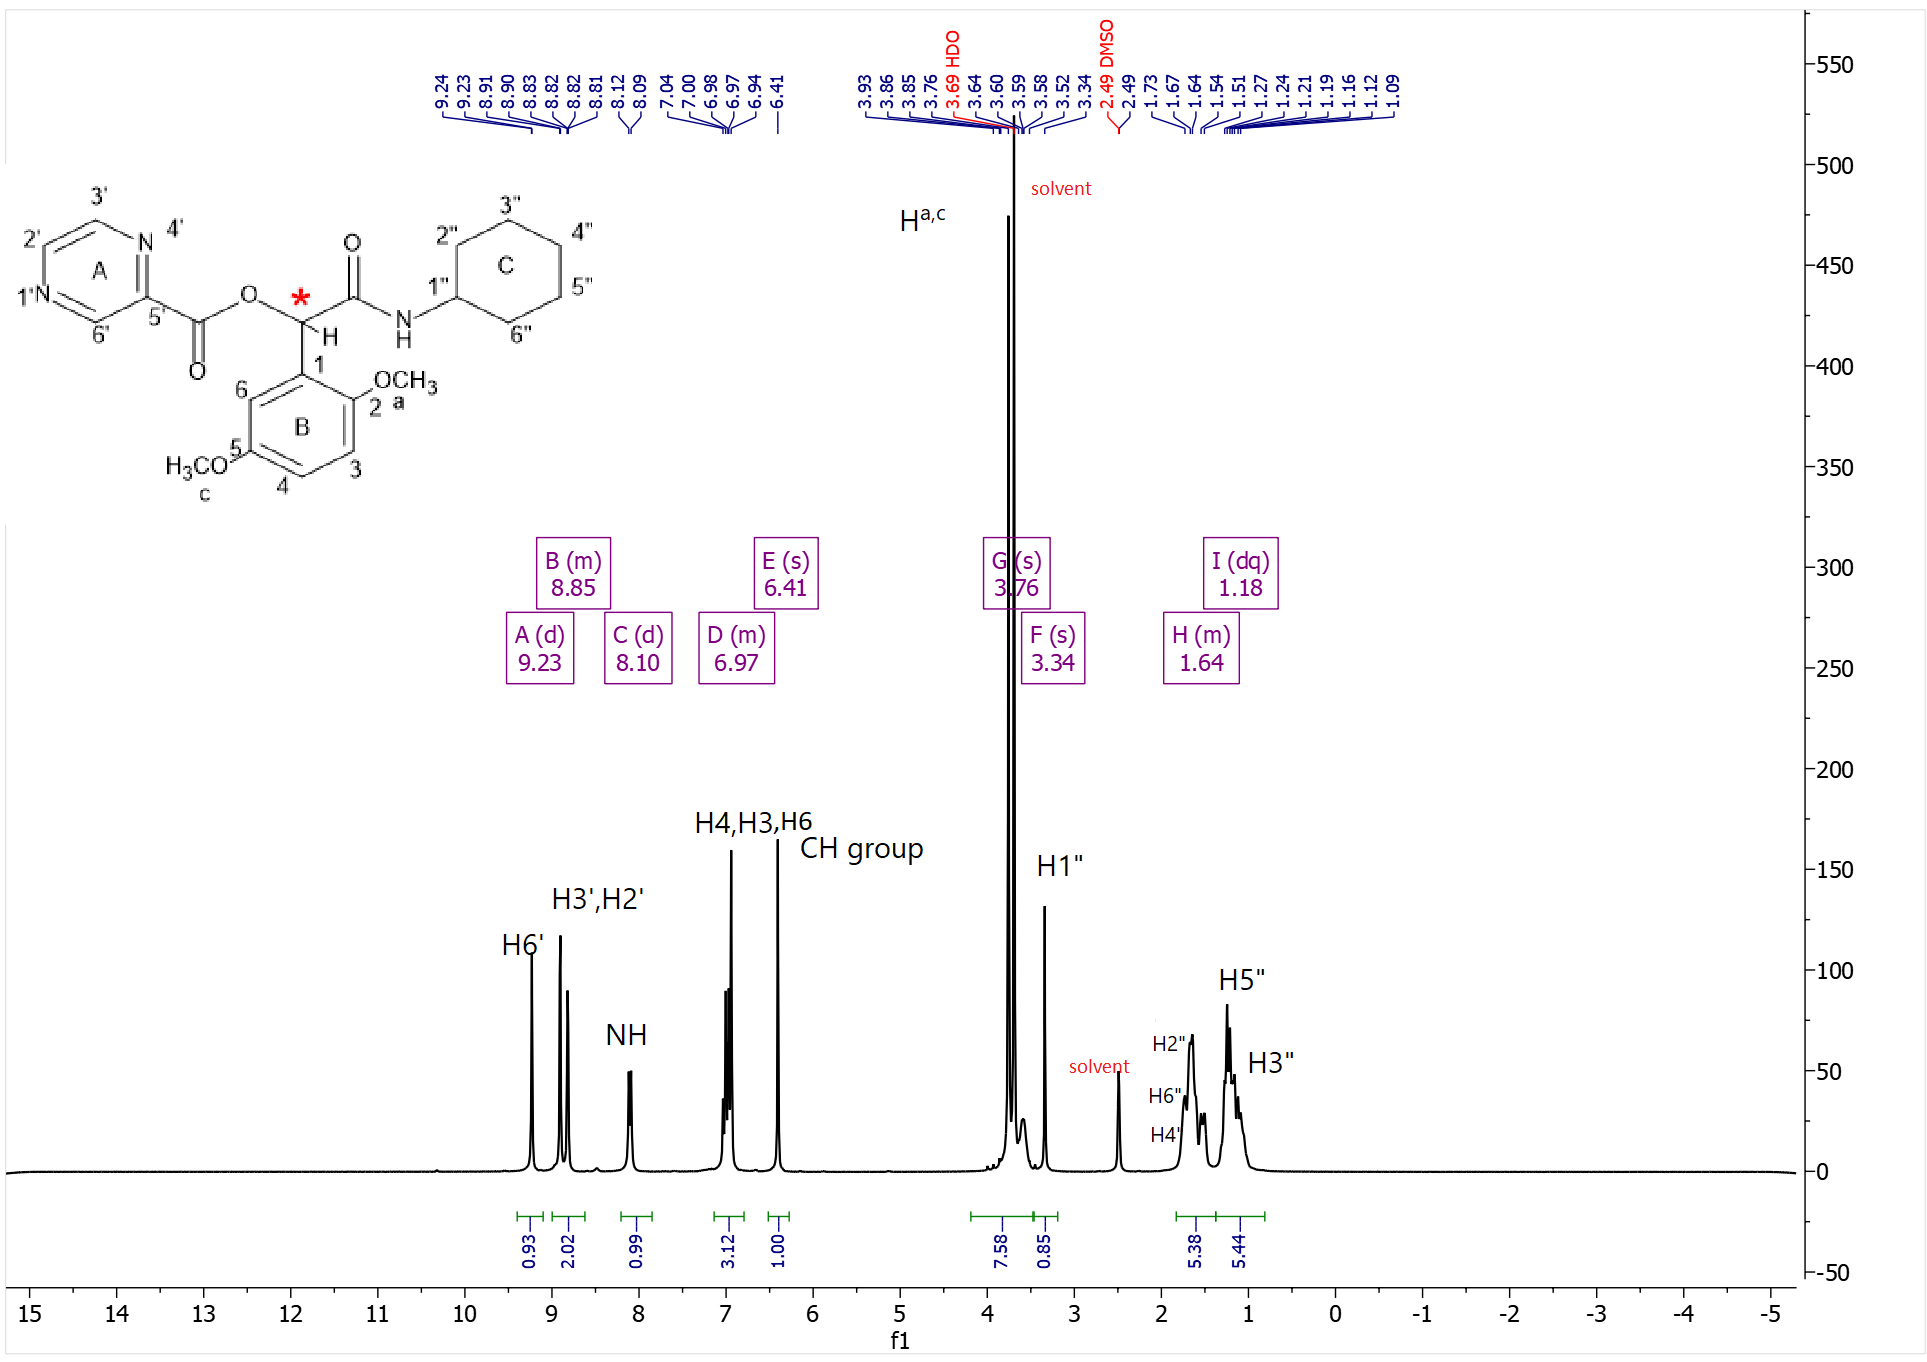


**Figure S16**. 1H-NMR spectrum of **P5**


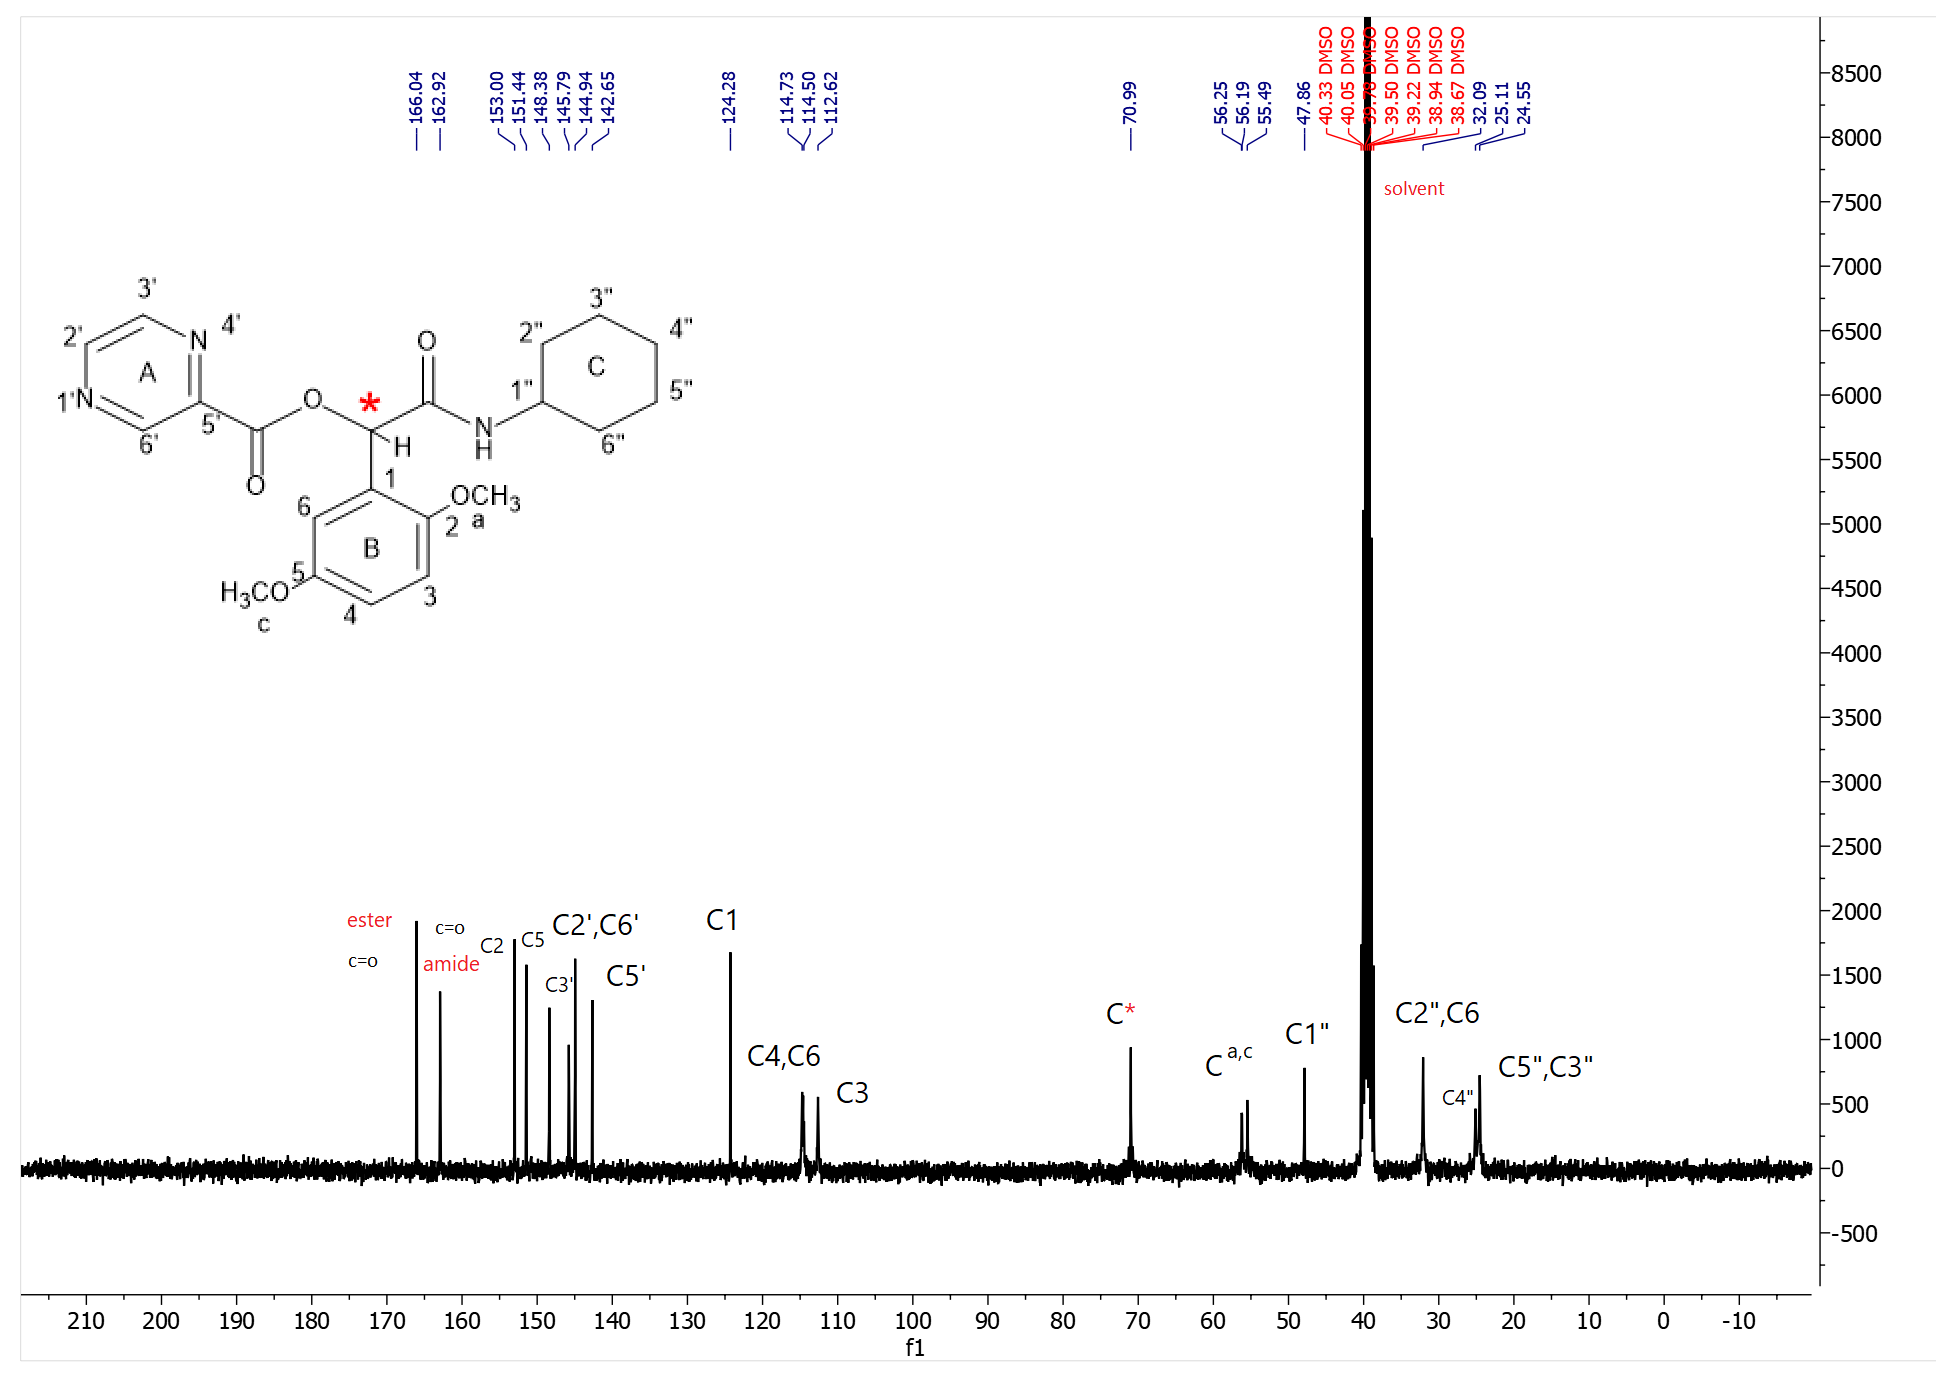


**Figure S17**. 13C-NMR spectrum of **P5**

**2-(cyclohexylamino)-2-oxo-1-(2,4,6-trimethoxyphenyl)ethyl pyrazine-2-carboxylate(P6)**


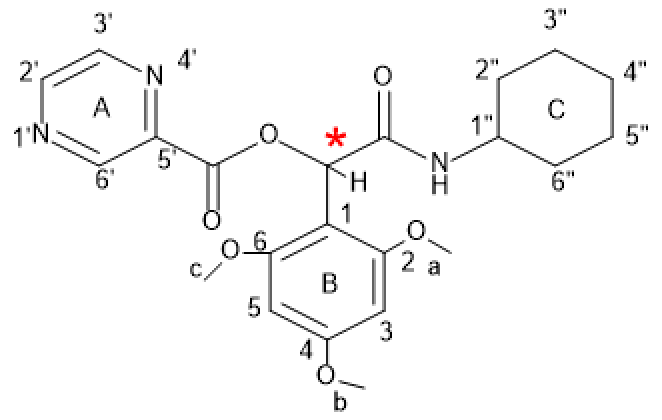


**P6**

Yield: 55%, mp: 99-100°C, white solid. IR (KBr disk): (3266.25 (NH amid group)), (3098.33-3029.84 (CH aromatic)), (2928.16-2852.96 (CH aliphatic)), (1746.36 (C=O ester)), (1655.67 (C=O amid)), (1593.12-1563.43 (C=C aromatic)), (1258.88 (C-O)) cm-1. 1H NMR (499 MHz, DMSO-d6) δ (10.33 (s, 1H)H6’), (9.23 (s, 1H) H3’), (8.86 (d, *J* = 43.7 Hz, 1H) H2’), (7.56 (d*, J* = 8.1 Hz, 1H) NH), (7.37 – 7.07 (m, 3H) H3), (6.94 – 6.71 (m, 1H) H5), (6.40 (s, 1H) NH), (5.84 (d, *J* = 5.4 Hz, 1H) CH*), (5.13 (d, *J* = 5.3 Hz, 2H) H5), (3.99 – 3.56 (m, 9H) Ha,b,c) overlapping multiple), (3.62 – 3.49 (m, 1H) H1”, (1.60 (d, *J* = 68.4 Hz, 3H) H2”,4”,6”), 1.19 (d, *J* = 62.3 Hz, 2H) H5”,3”). 13C NMR (126 MHz, dmso) δ 189.30, 171.43, 153.52, 151.34, 131.43, 124.77, 123.58, 114.90, 114.30, 113.52, 112.83, 110.70, 68.29, 56.81, 56.58, 56.01, 55.93, 55.77, 47.63, 40.49, 40.32, 40.15, 39.98, 39.82, 39.65, 39.48, 32.80, 32.61, 25.59, 25.11, 25.07**.** Elemental analysis calcd (%) for C22H27N3O6 (429.19):C,61.53; H,6.34; N,9.78;found: C,61.54;H,6.44;N,10.65.


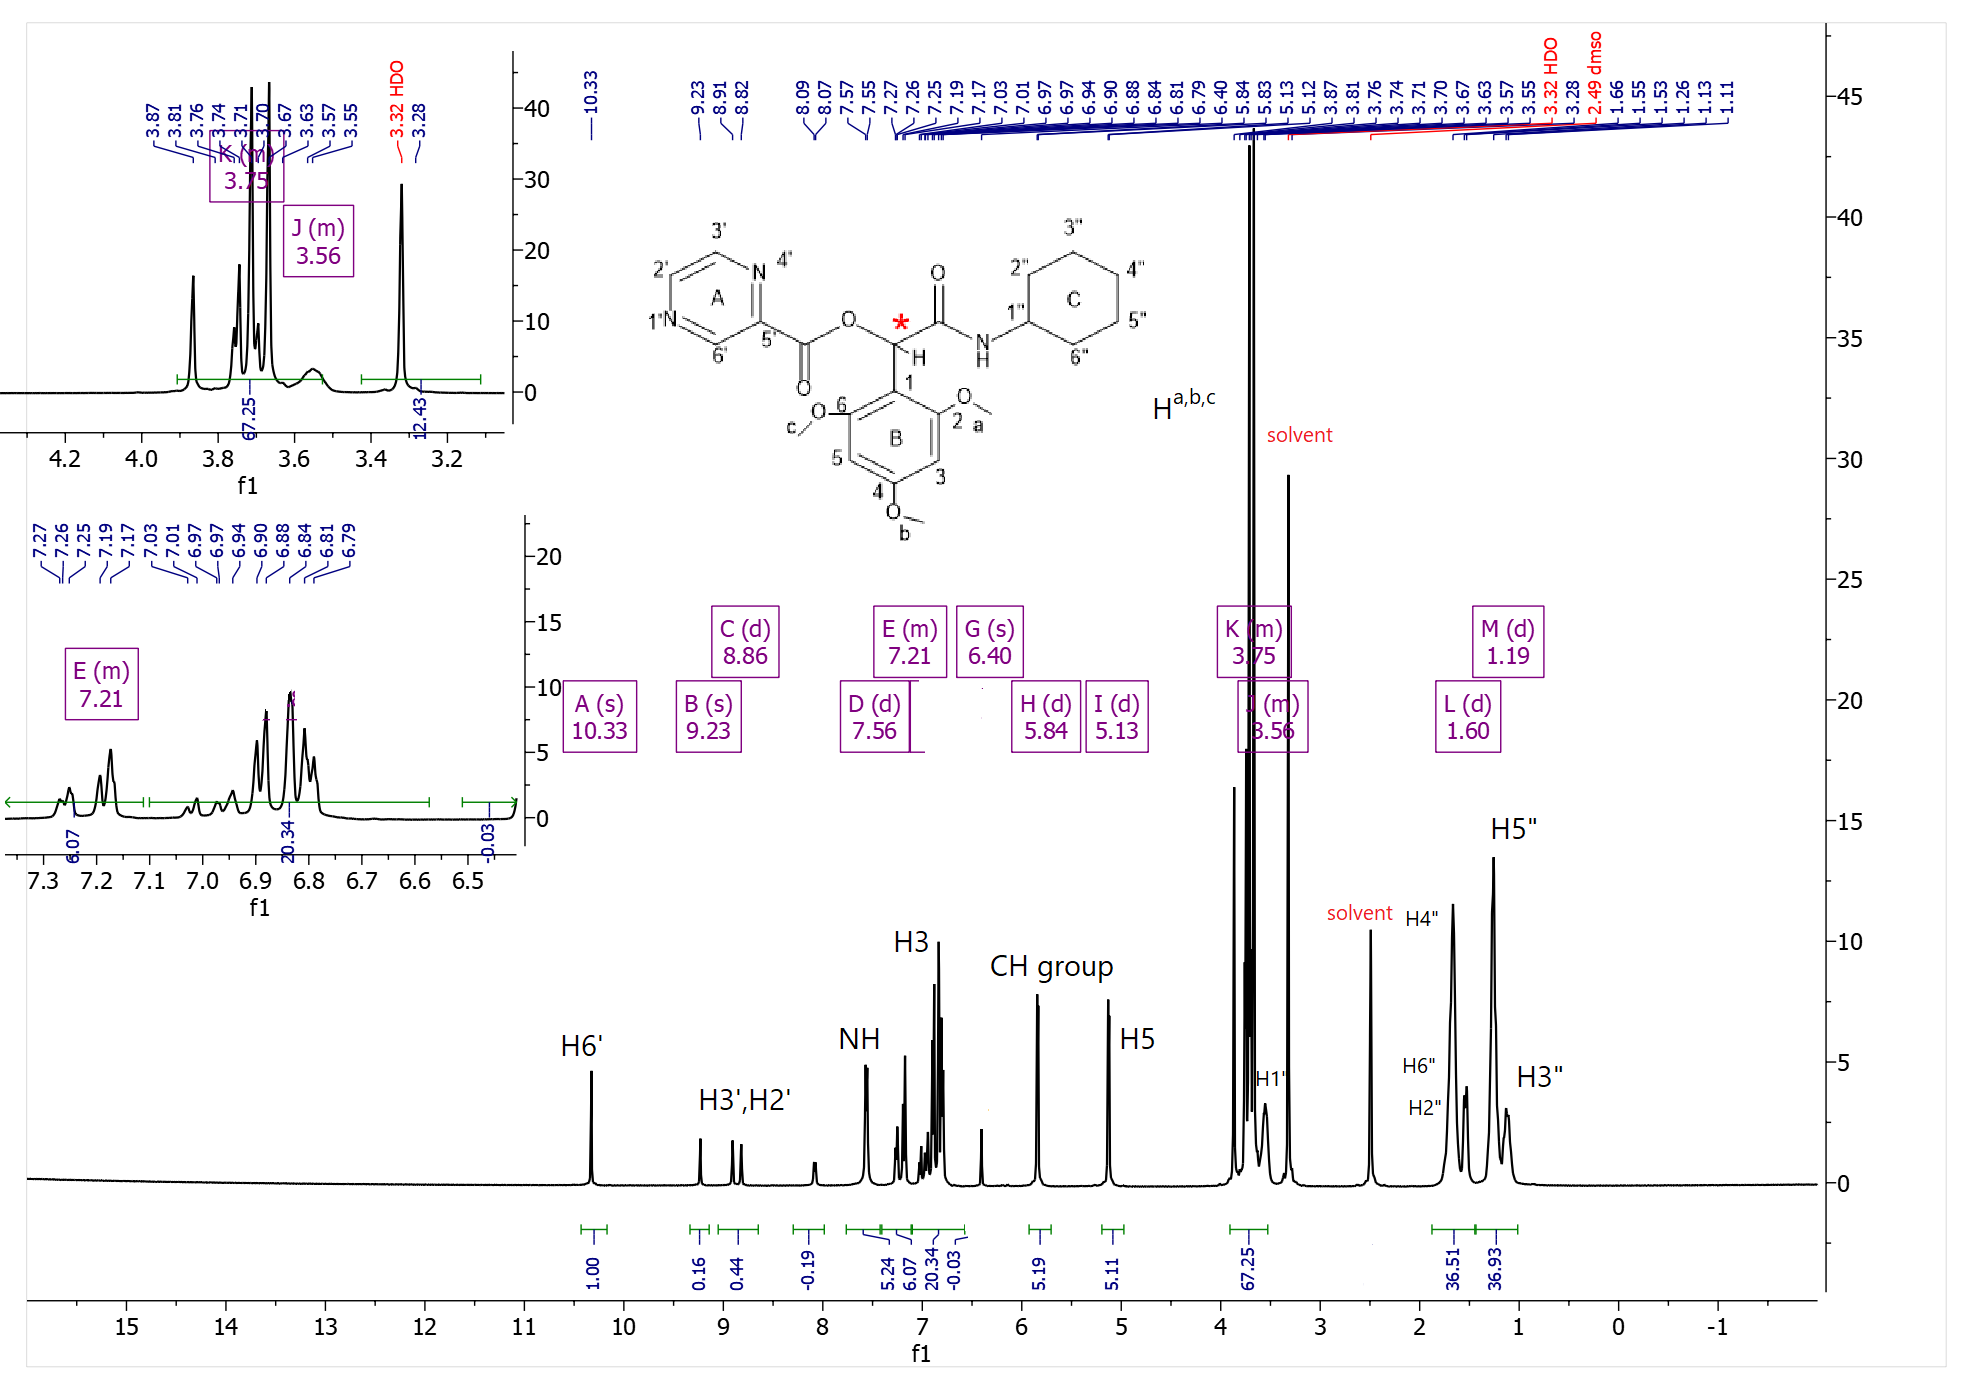


**Figure S18**. 1H-NMR spectrum of **P6**


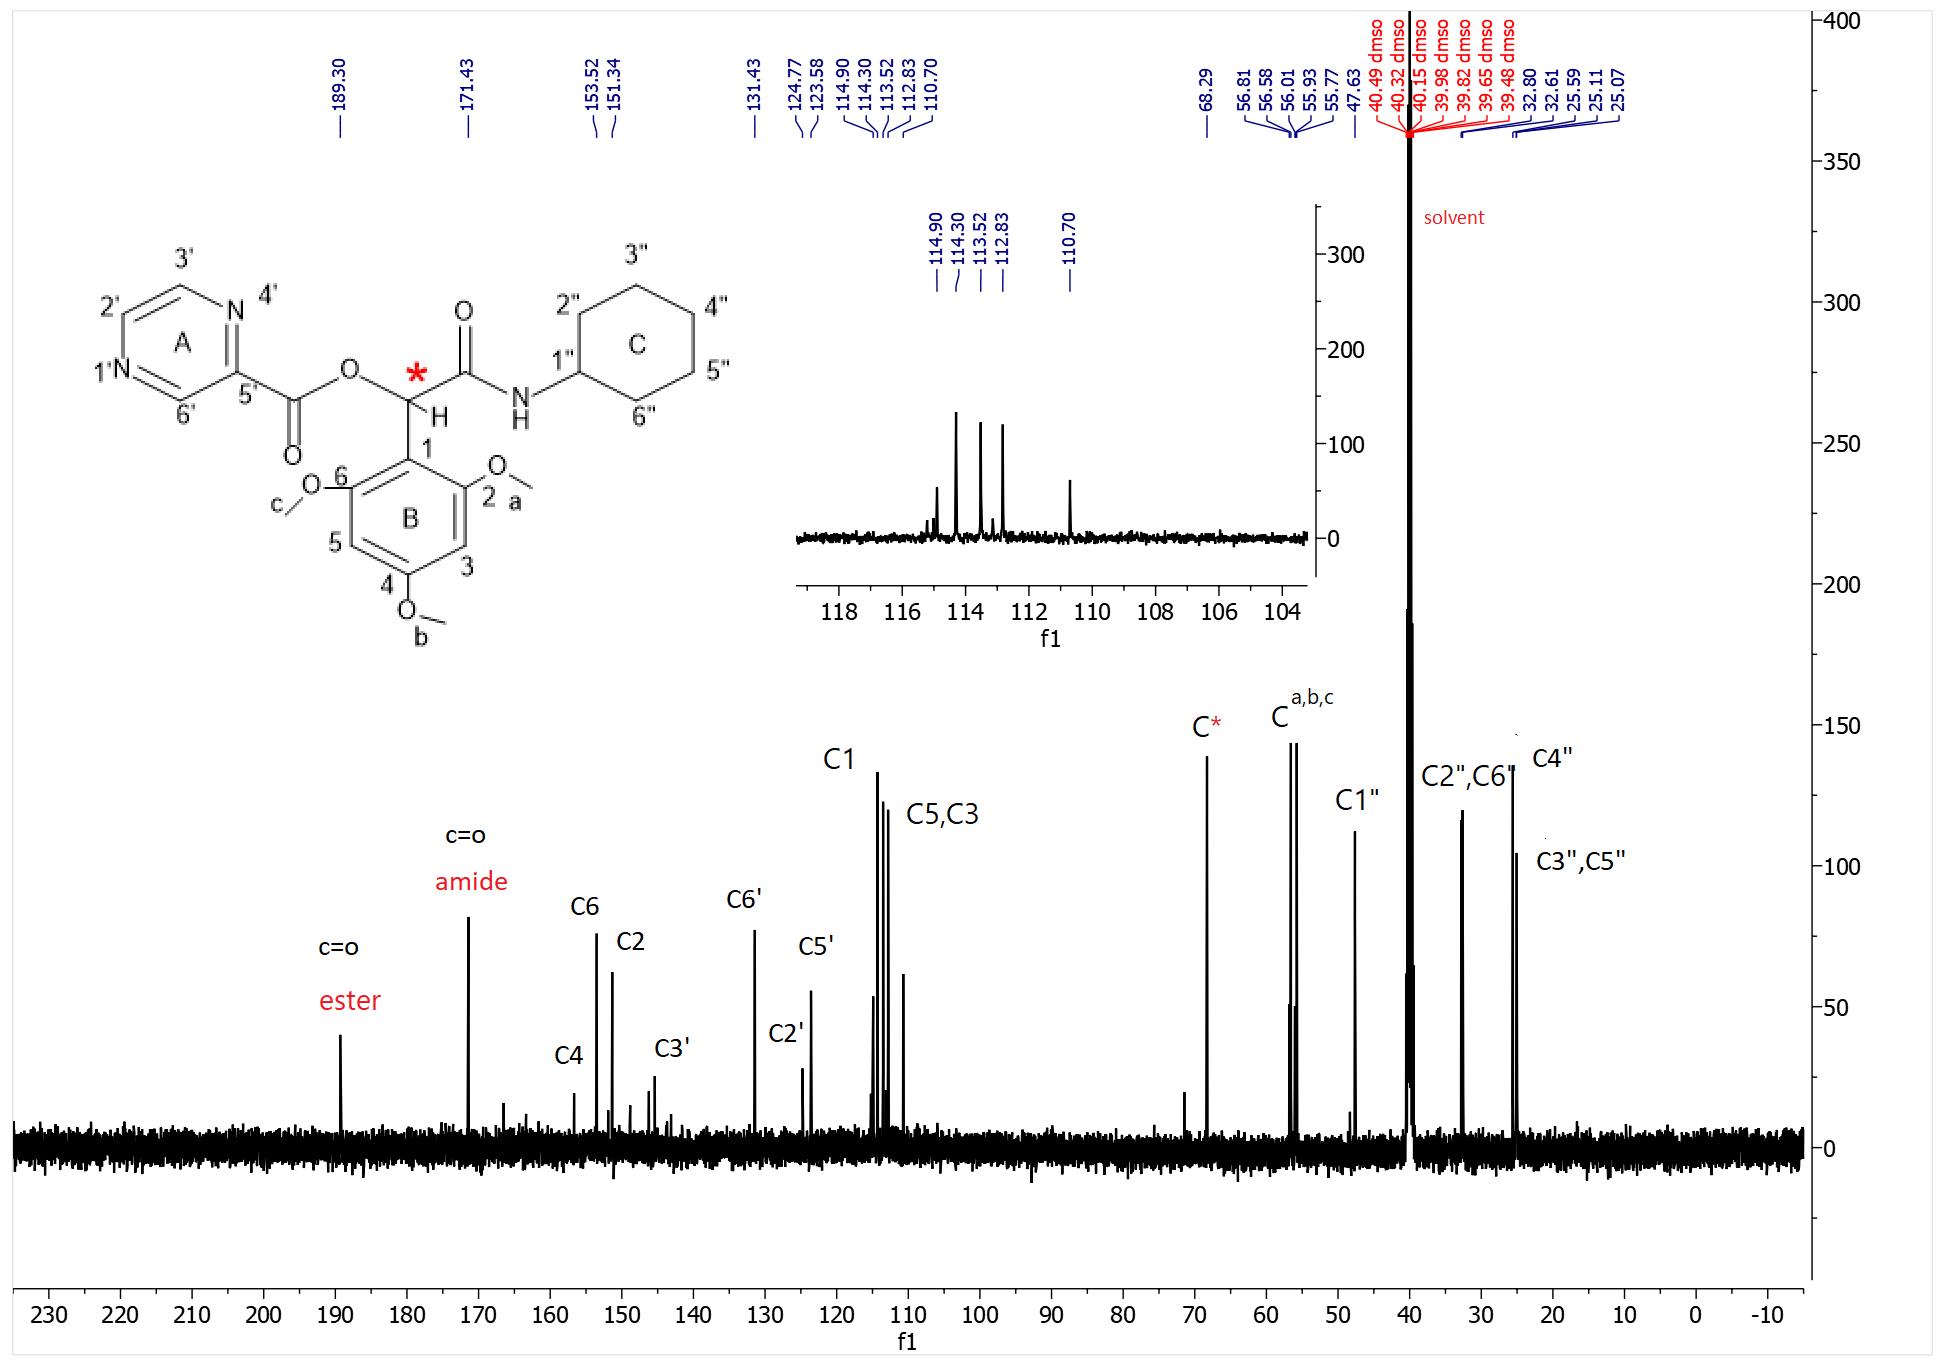


**Figure S19**. 13C-NMR spectrum of **P6**


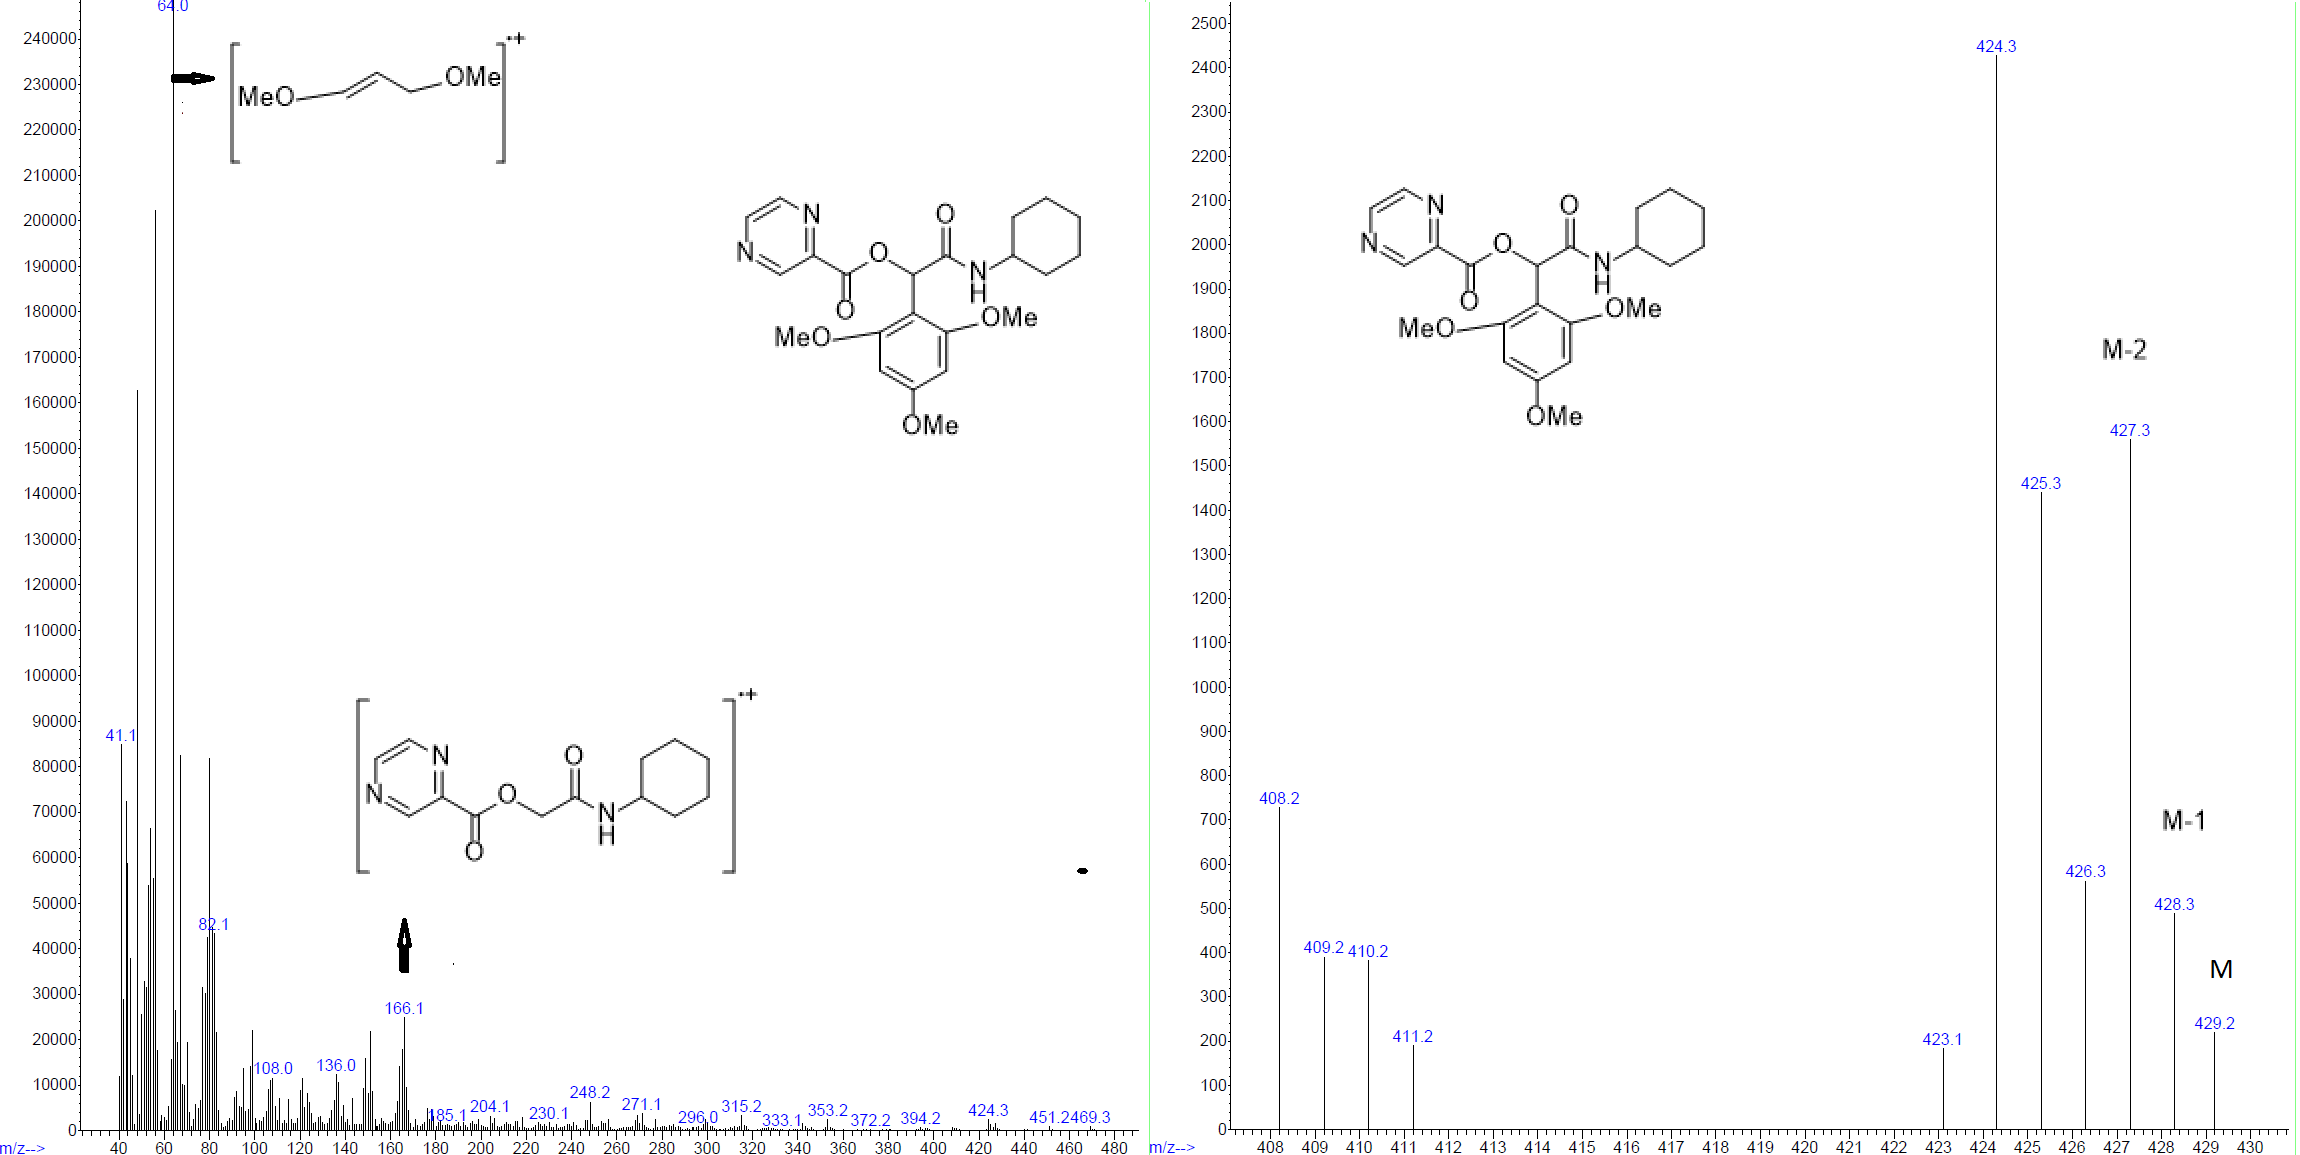


**Figure S20**. Mass spectrum of **P6**

**2-(cyclohexylamino)-1-(2-nitrophenyl)-2-oxoethyl pyrazine-2-carboxylate(P7)**


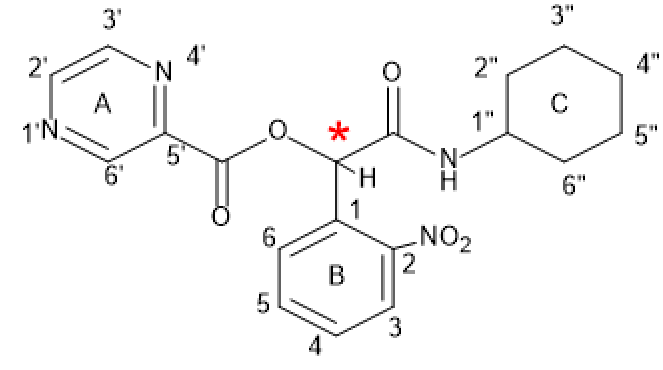


**P7**

Yield: 84%, mp: 160-162°C, white solid. IR (KBr disk): (3285.07 (NH amid group)), (3093.62-3029.84 (CH aromatic)), (2931.26-2855.74 (CH aliphatic)), (1730.45 (C=O ester)), (1656.67 (C=O amid)), (1527.37-1559.44 (C=C aromatic)), (1279.34 (C-O)) cm-1. 1H NMR (499 MHz, DMSO-d6) δ (9.27 (s, 1H)H6’, (8.90 (d, *J* = 40.8 Hz, 2H)H3’,2’), (8.33 (d*, J* = 7.4 Hz, 1H) NH), (8.11 (d*, J* = 7.9 Hz, 1H) H3), (7.93 – 7.54 (m, 3H) H4,5,6), (6.79 (s, 1H)CH*, (3.59 (s, 1H) H1”), (1.90 – 1.41 (m, 6H) H6”,4”,2”) , (1.17 (ddd, *J* = 44.4, 20.7, 10.0 Hz, 4H) H3”,5”). 13C NMR (126 MHz, dmso) δ 165.40, 163.06, 149.00, 146.36, 145.49, 142.83, 134.48, 130.70, 130.36, 129.77, 125.43, 72.18, 48.61, 40.32, 40.15, 39.98, 39.82, 39.65, 32.51, 32.47, 25.56, 24.88, 24.83.


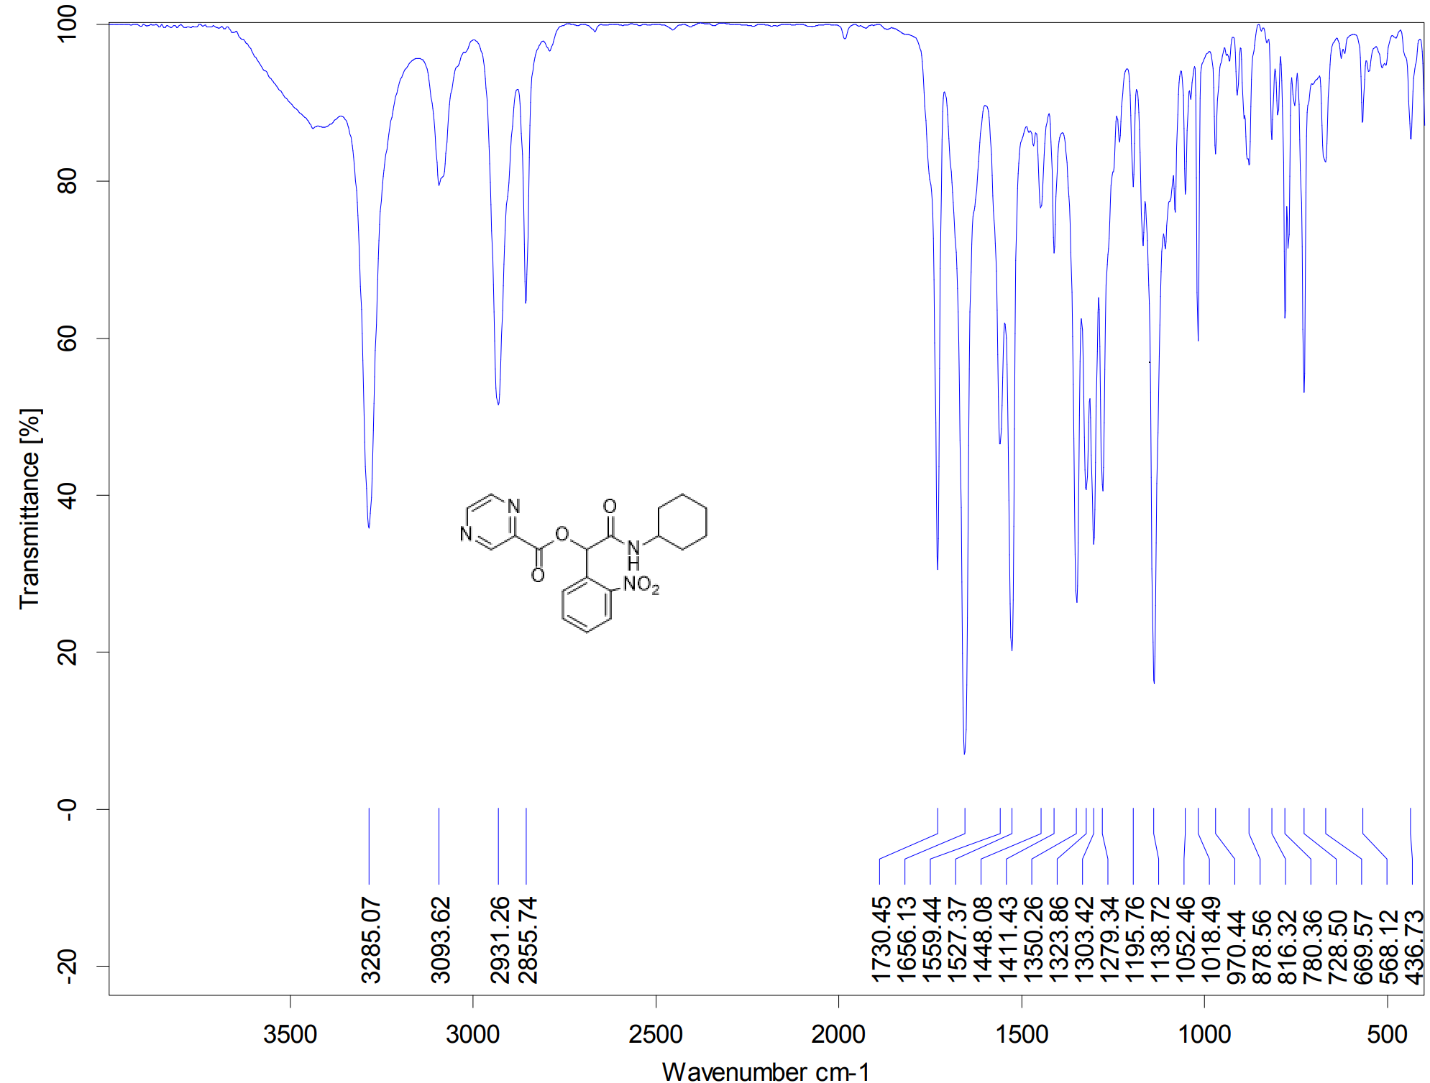


**Figure S21**. IR spectrum of **P7**


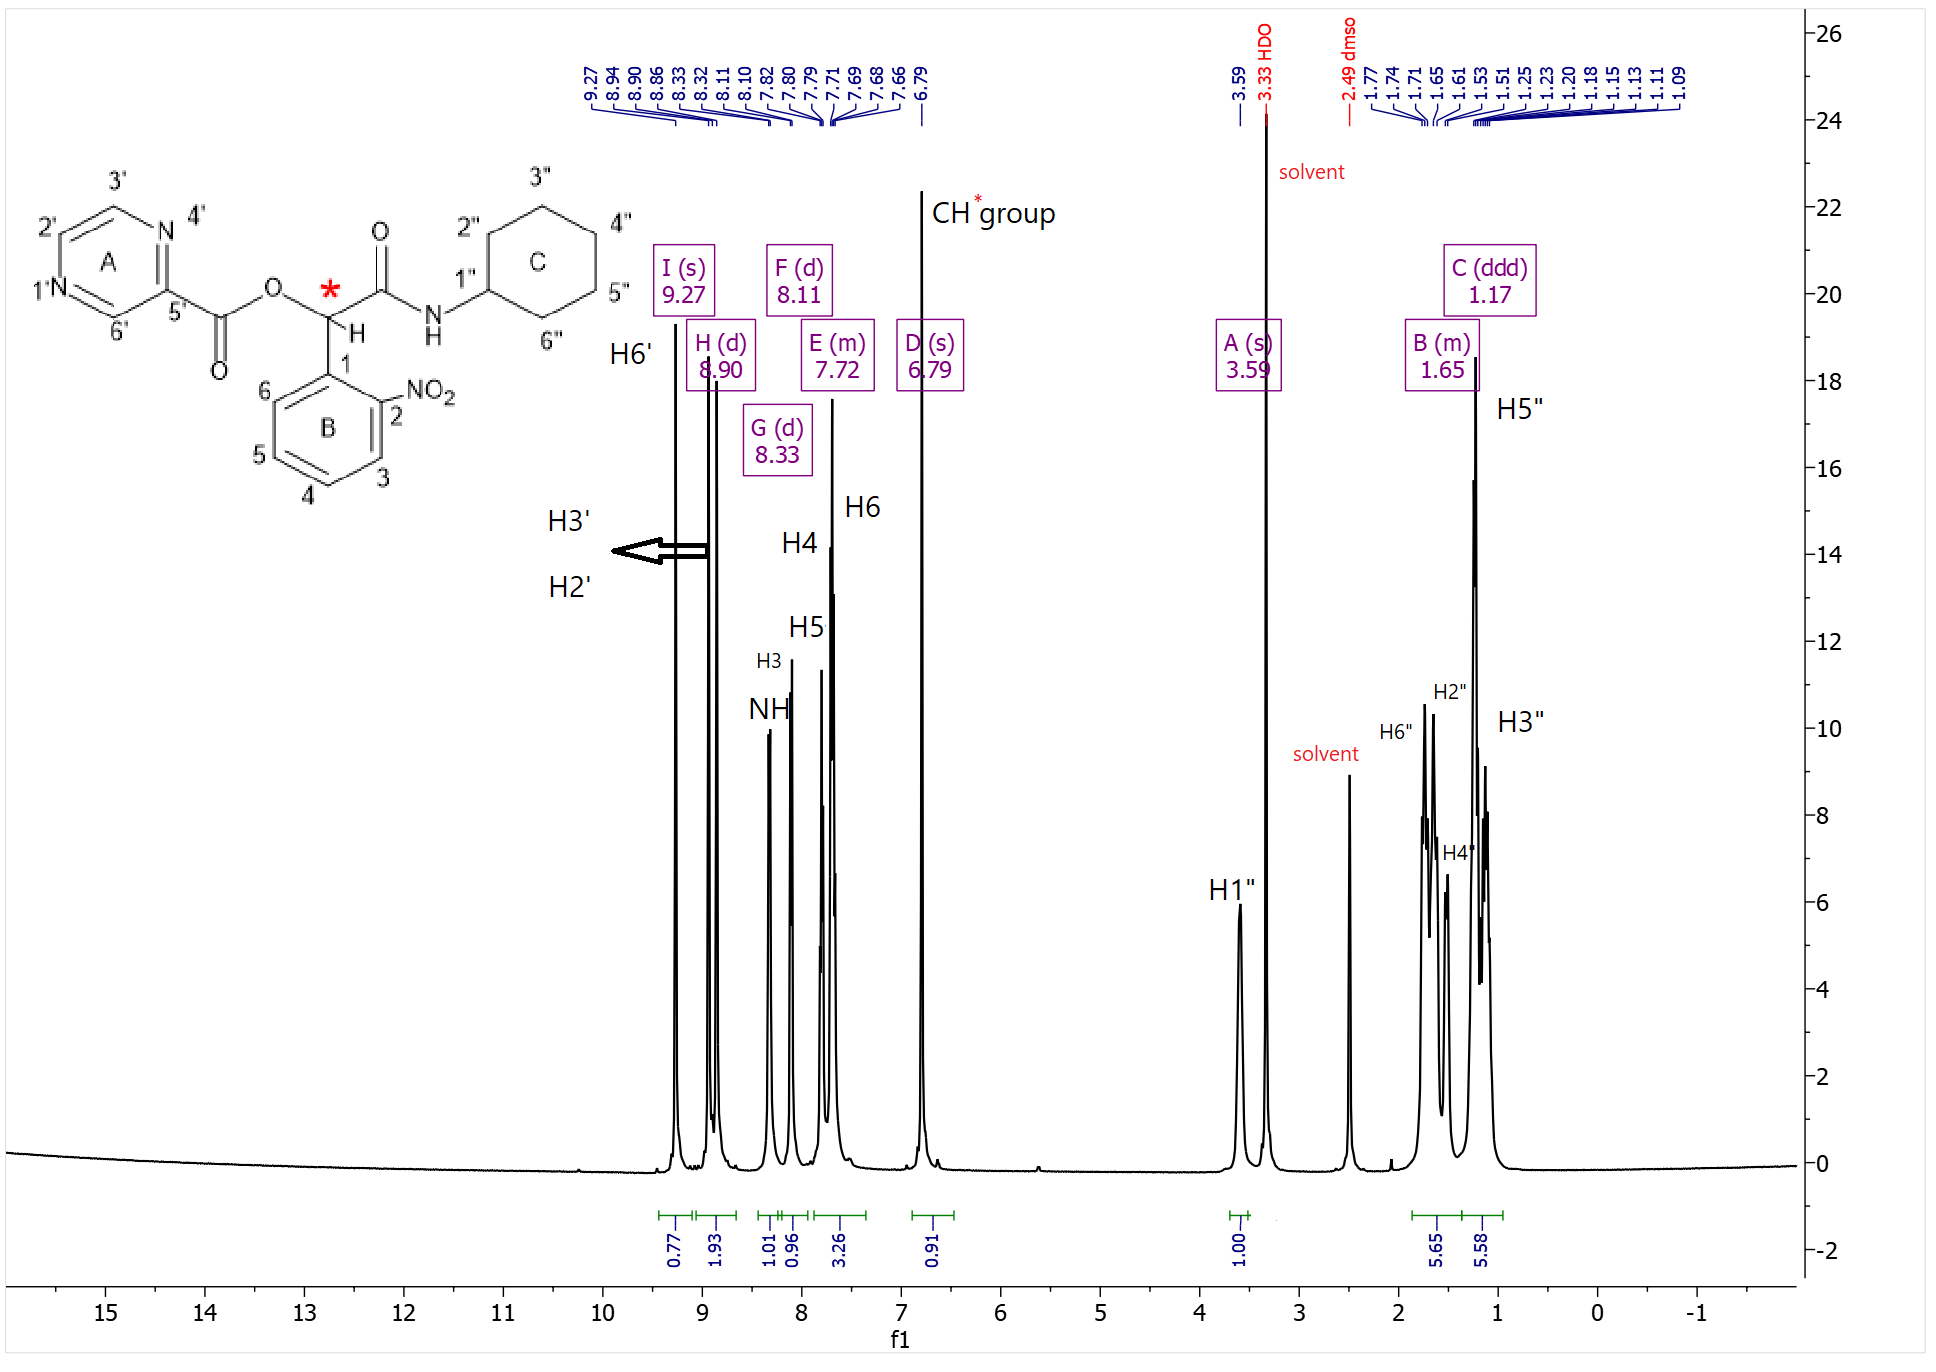


**Figure S22**. 1H-NMR spectrum of **P7**


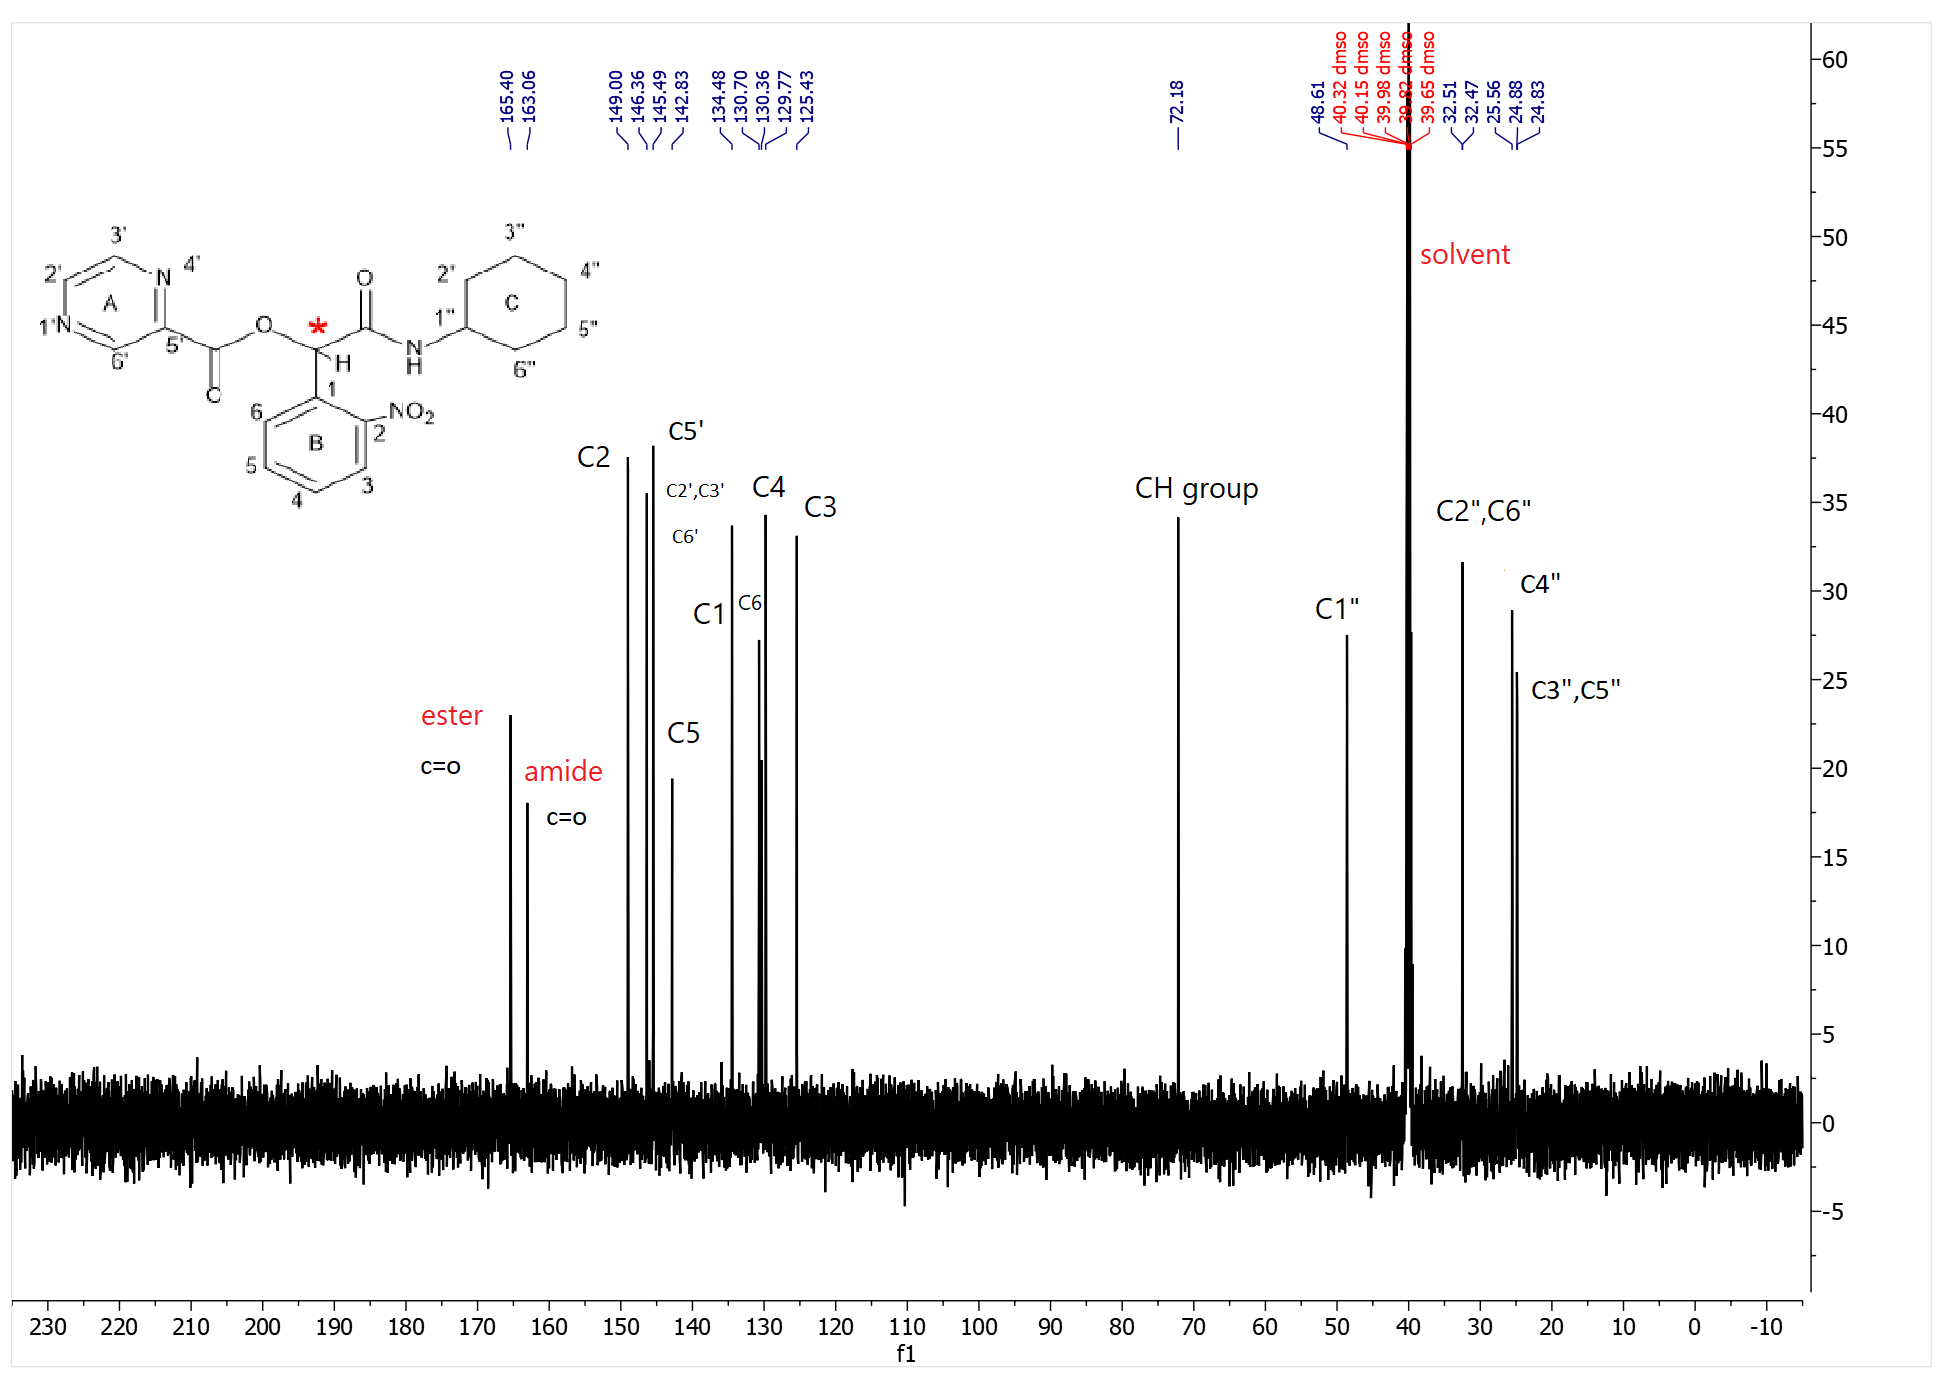


**Figure S23**. 13C-NMR spectrum of **P7**

**2-(cyclohexylamino)-1-(3-nitrophenyl)-2-oxoethyl pyrazine-2-carboxylate(P8)**


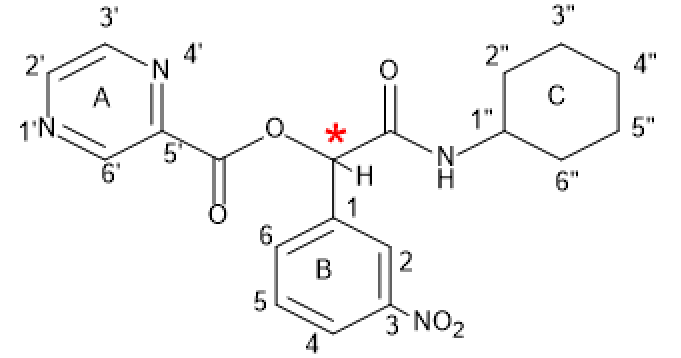


**P8**

Yield: 90%, mp: 163-165°C, white solid. IR (KBr disk): (3285.07 (NH amid group)), (3093.62-3029.84 (CH aromatic)), (2931.26-2855.74 (CH aliphatic)), (1730.45 (C=O ester)), (1656.67 (C=O amid)), (1527.37-1559.44 (C=C aromatic)), (1279.34 (C-O)) cm-1. 1H NMR (499 MHz, DMSO-d6) δ (9.39 – 9.13 (m, 1H) H6’), (8.92 (dt, *J* = 34.5, 1.5 Hz, 3H)H3’,2’, (8.47 (d, *J* = 12.4 Hz, 1H) H2), (8.27 (d*, J* = 8.2 Hz, 1H)H4) , (8.08 (d, *J* = 7.5 Hz, 1H) NH), (7.87 – 7.62 (m, 2H) H6,5), (6.30 (s, 1H) CH* group, (3.53 (s, 1H)H1”), (1.94 – 1.39 (m, 6H) H6”,4”,2”), (1.41 – 0.86 (m, 3H) H5”,3”). 13C NMR (126 MHz, dmso) δ 166.18, 163.06, 148.98, 148.23, 146.40, 145.49, 142.93, 138.05, 134.27, 130.75, 124.14, 122.45, 75.57, 48.34, 40.51, 40.34, 40.26, 40.17, 40.01, 39.84, 39.67, 39.51, 32.62, 32.41, 25.56, 24.85, 24.75**.** Elemental analysis calcd (%) for C19H20N4O5 (384.39):C, 59.37; H, 5.24; N,14.58;found: C,58.43;H,4.30;N 13.64.


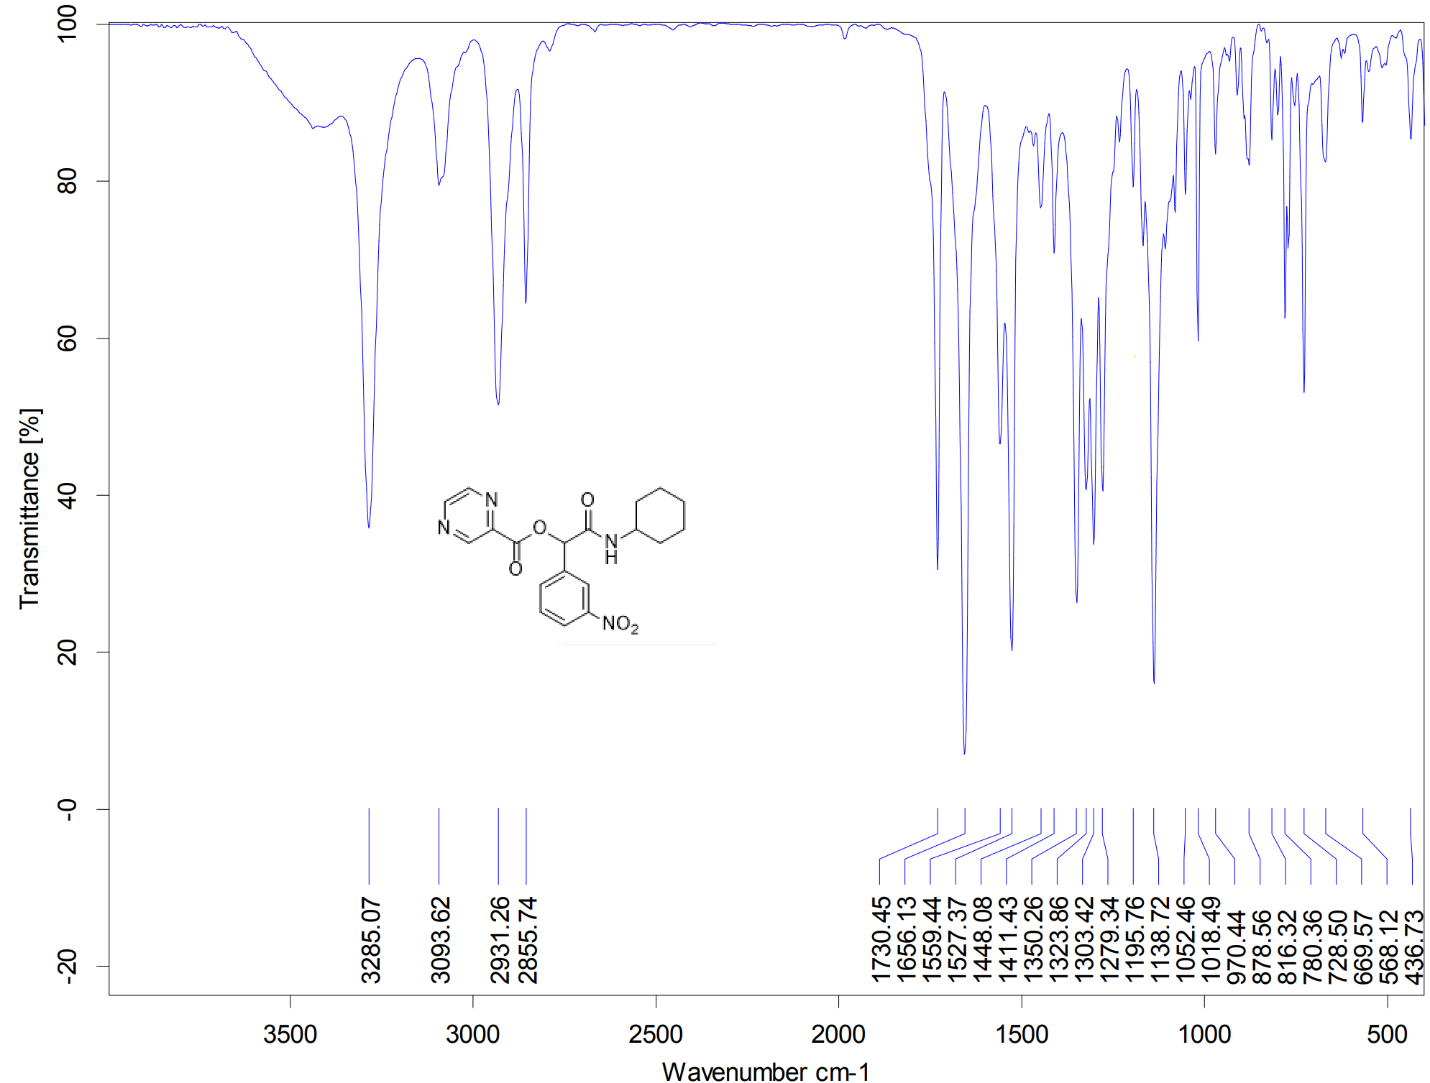


**Figure S24**. IR spectrum of **P8**


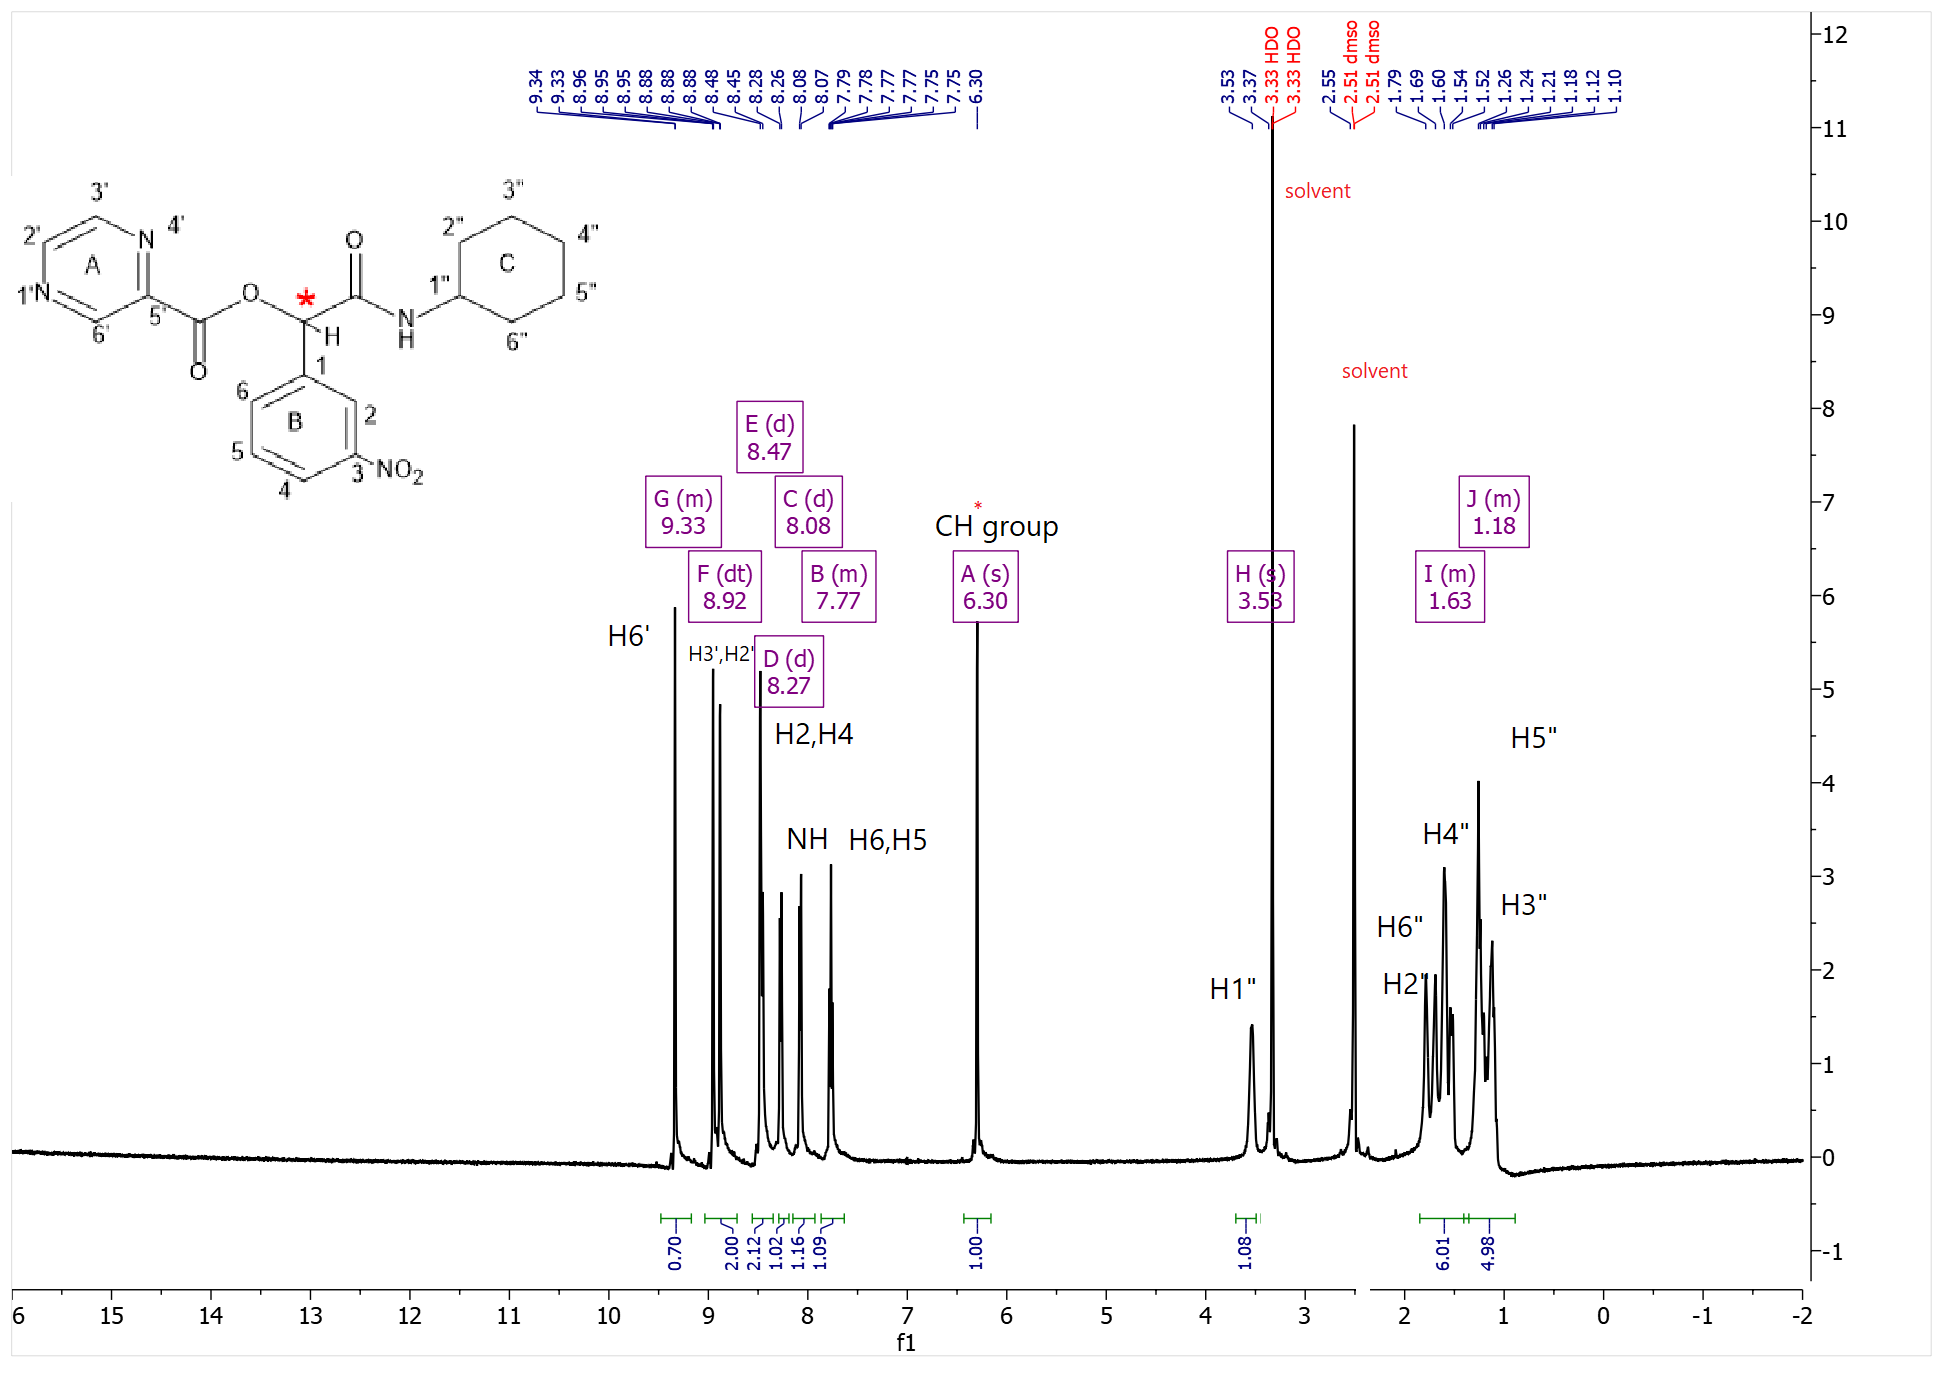


**Figure S25**. 1H-NMR spectrum of **P8**


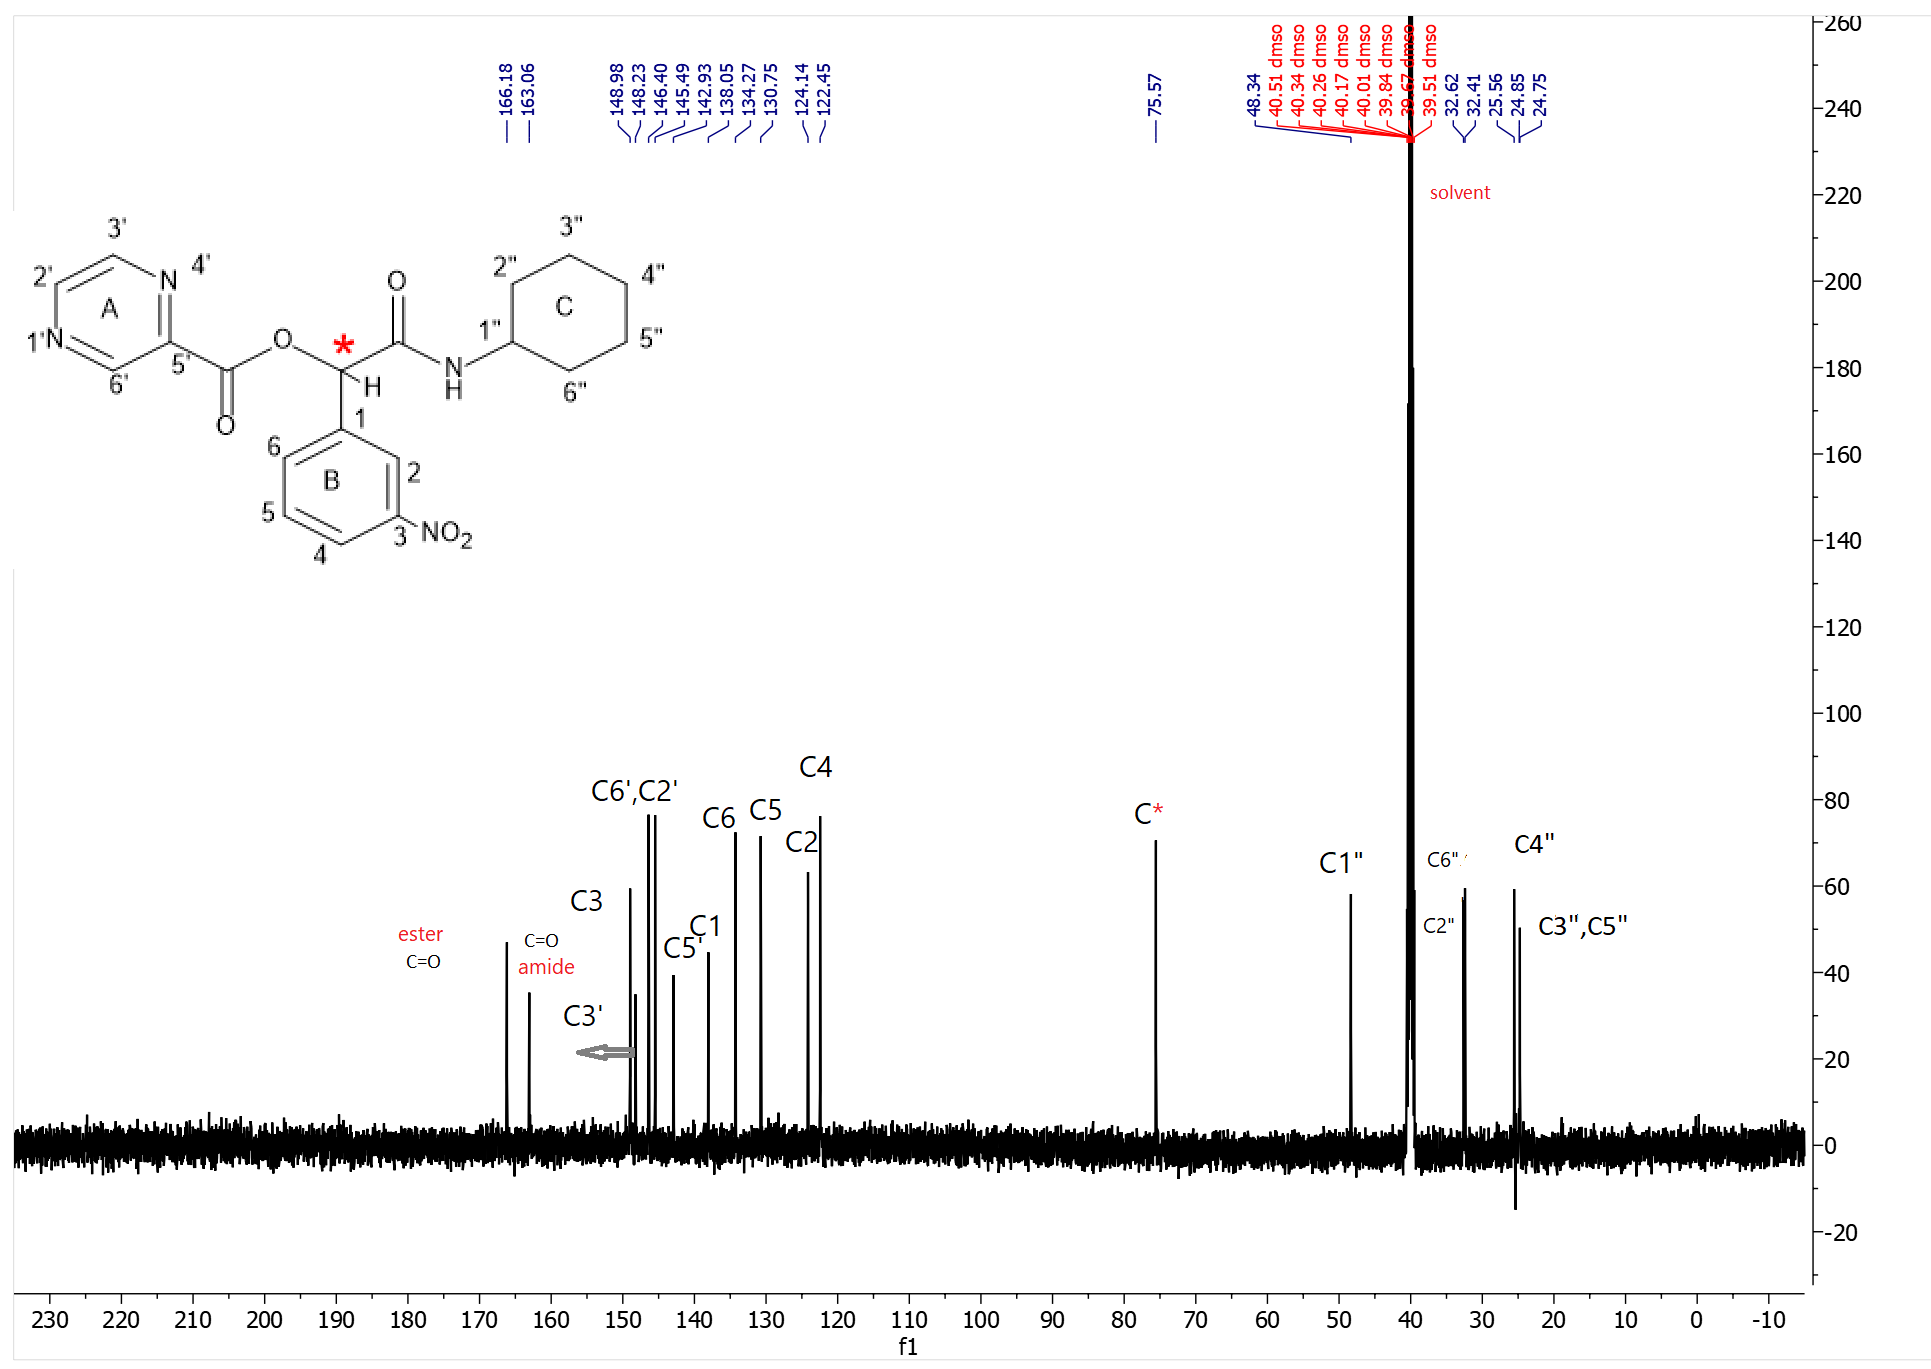


**Figure S26**. 13C-NMR spectrum of **P8**


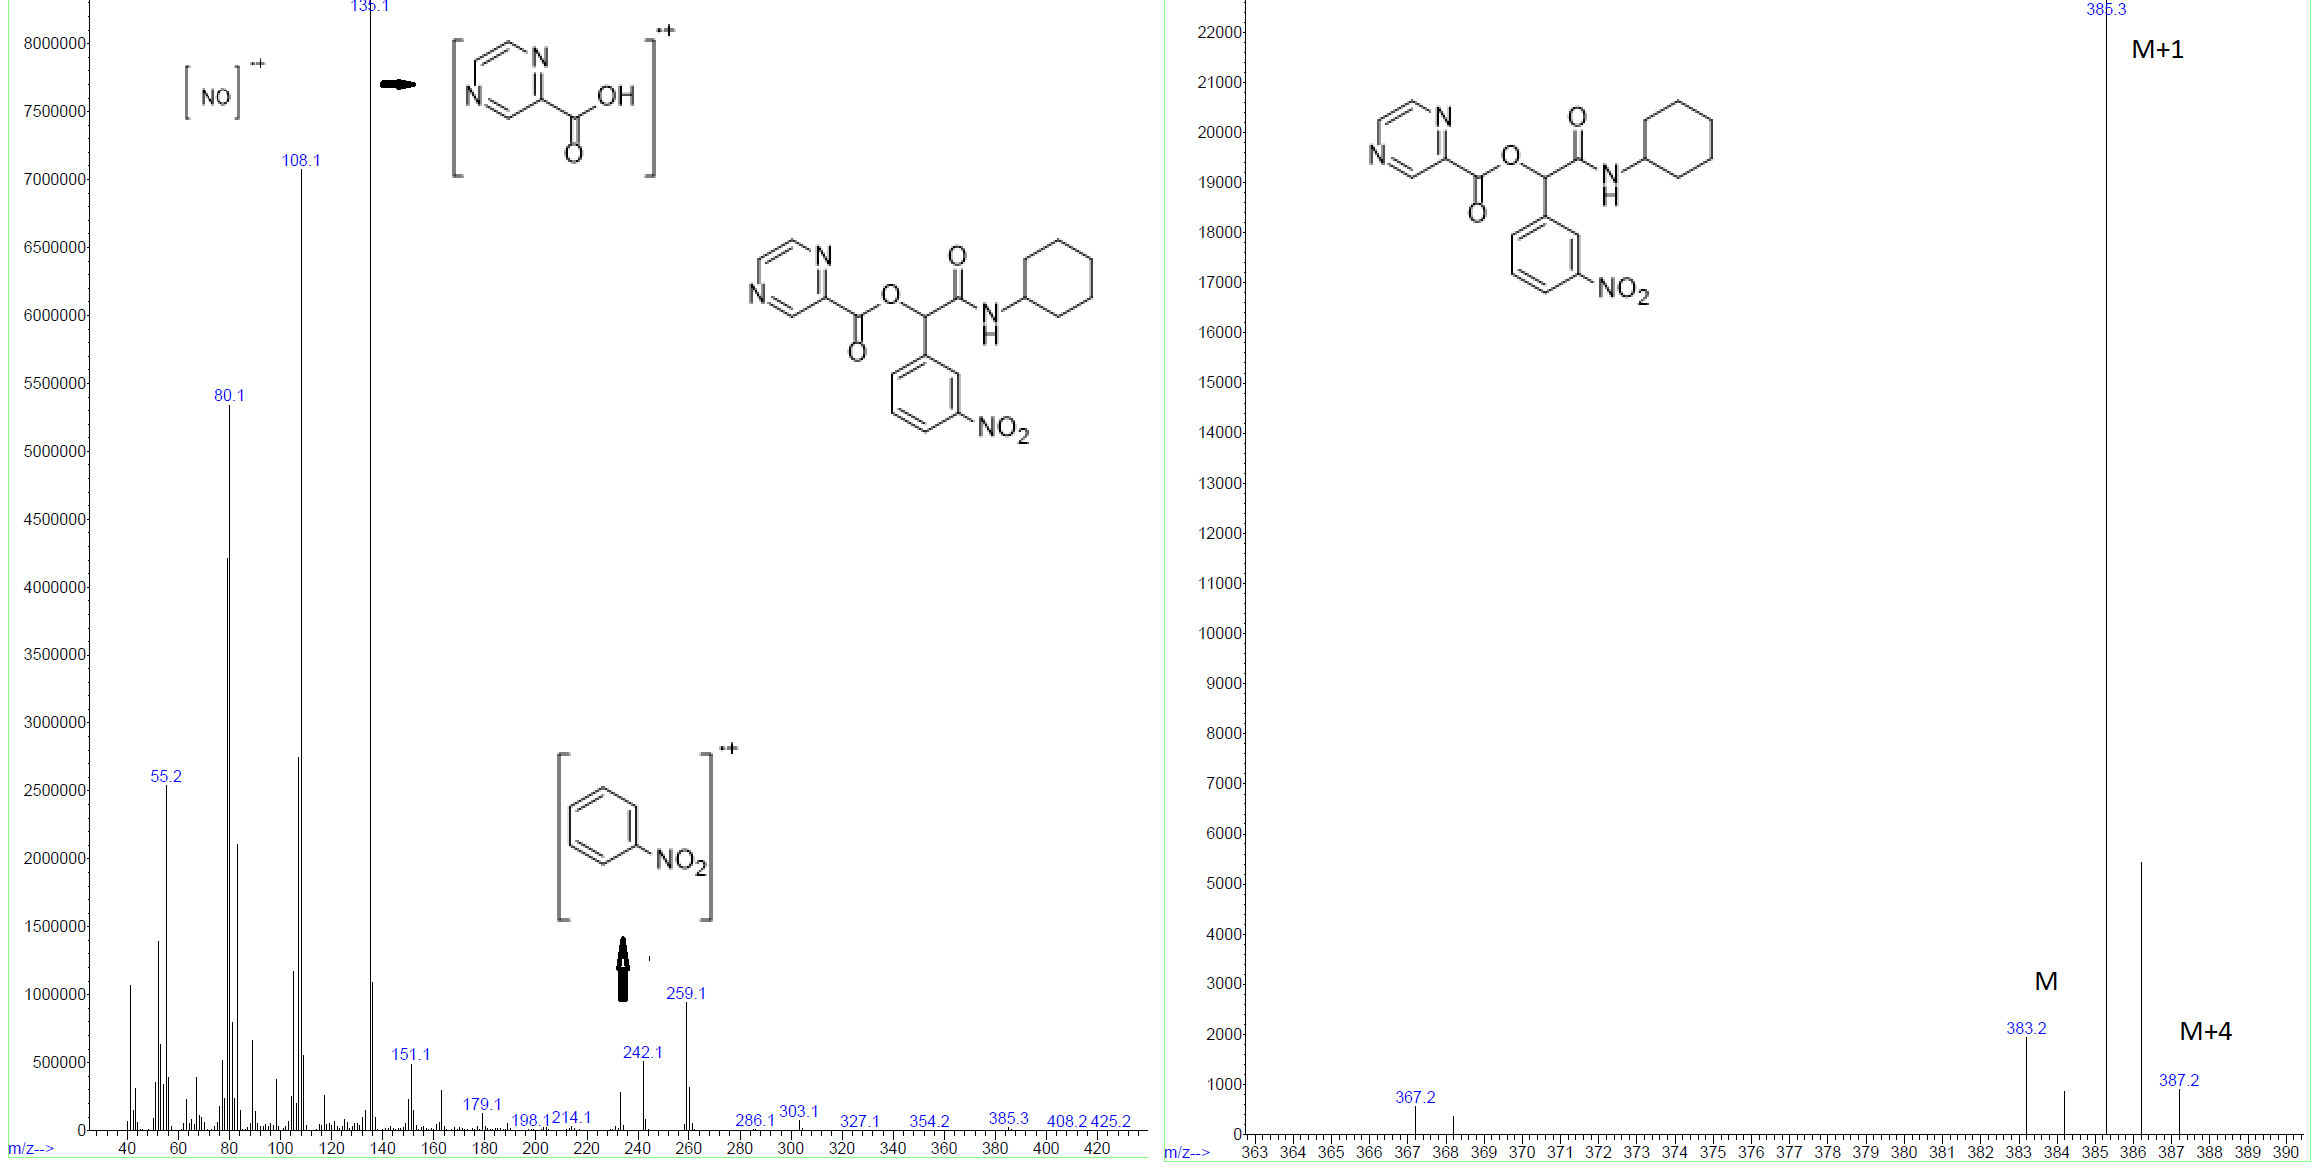


**Figure S27**. Mass spectrum of **P8**

**2-(cyclohexylamino)-1-(4-nitrophenyl)-2-oxoethyl pyrazine-2-carboxylate(P9)**


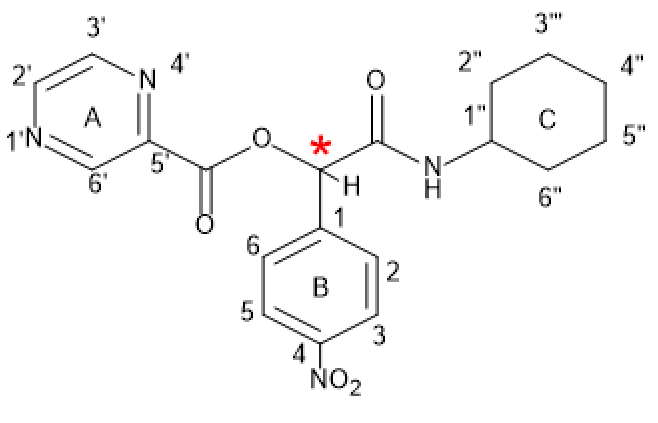


**P9**

Yield: 85%, mp: 200-202°C, white solid. IR (KBr disk): (3285.07 (NH amid group)), (3093.62-3029.84 (CH aromatic)), (2931.26-2855.74 (CH aliphatic)), (1730.45 (C=O ester)), (1656.67 (C=O amid)), (1527.37-1559.44 (C=C aromatic)), (1279.34 (C-O)) cm-1. 1H NMR (499 MHz, DMSO-d6) δ (9.34 (s, 1H) H6’, (8.90 (d, *J* = 35.1 Hz, 2H) H3’,2’), (8.37 (dd, *J* = 77.1, 7.9 Hz, 3H) H5,3,NH), (7.89 (d, *J* = 8.2 Hz, 2H) H6,2), (6.28 (s, 1H) CH*), (3.51 (s, 2H)H1’, (1.81 – 1.33 (m, 6H) H4”,6”,2”), (1.33 – 0.85 (m, 3H)H5”,3”). 13C NMR (126 MHz, dmso) δ 165.96, 162.99, 148.97, 148.07, 146.40, 145.48, 143.09, 142.89, 128.80, 124.14, 75.76, 48.37, 40.48, 40.31, 40.15, 39.98, 39.81, 39.65, 39.48, 32.62, 32.39, 25.54, 24.84, 24.75**.**


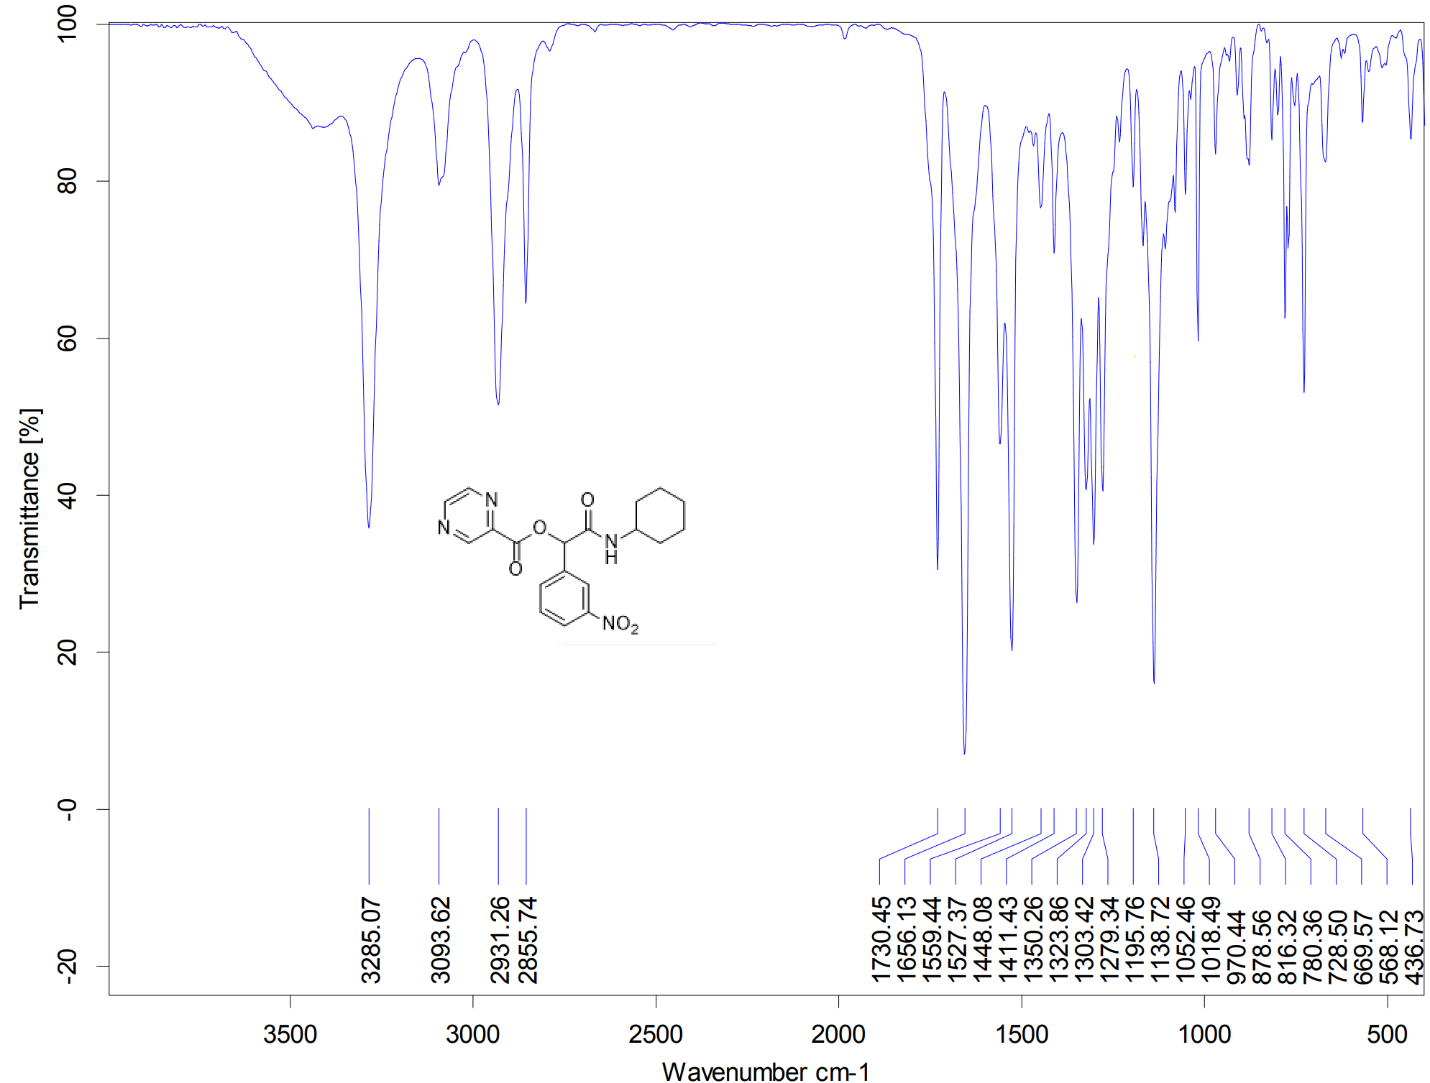


**Figure S28**. IR spectrum of **P9**


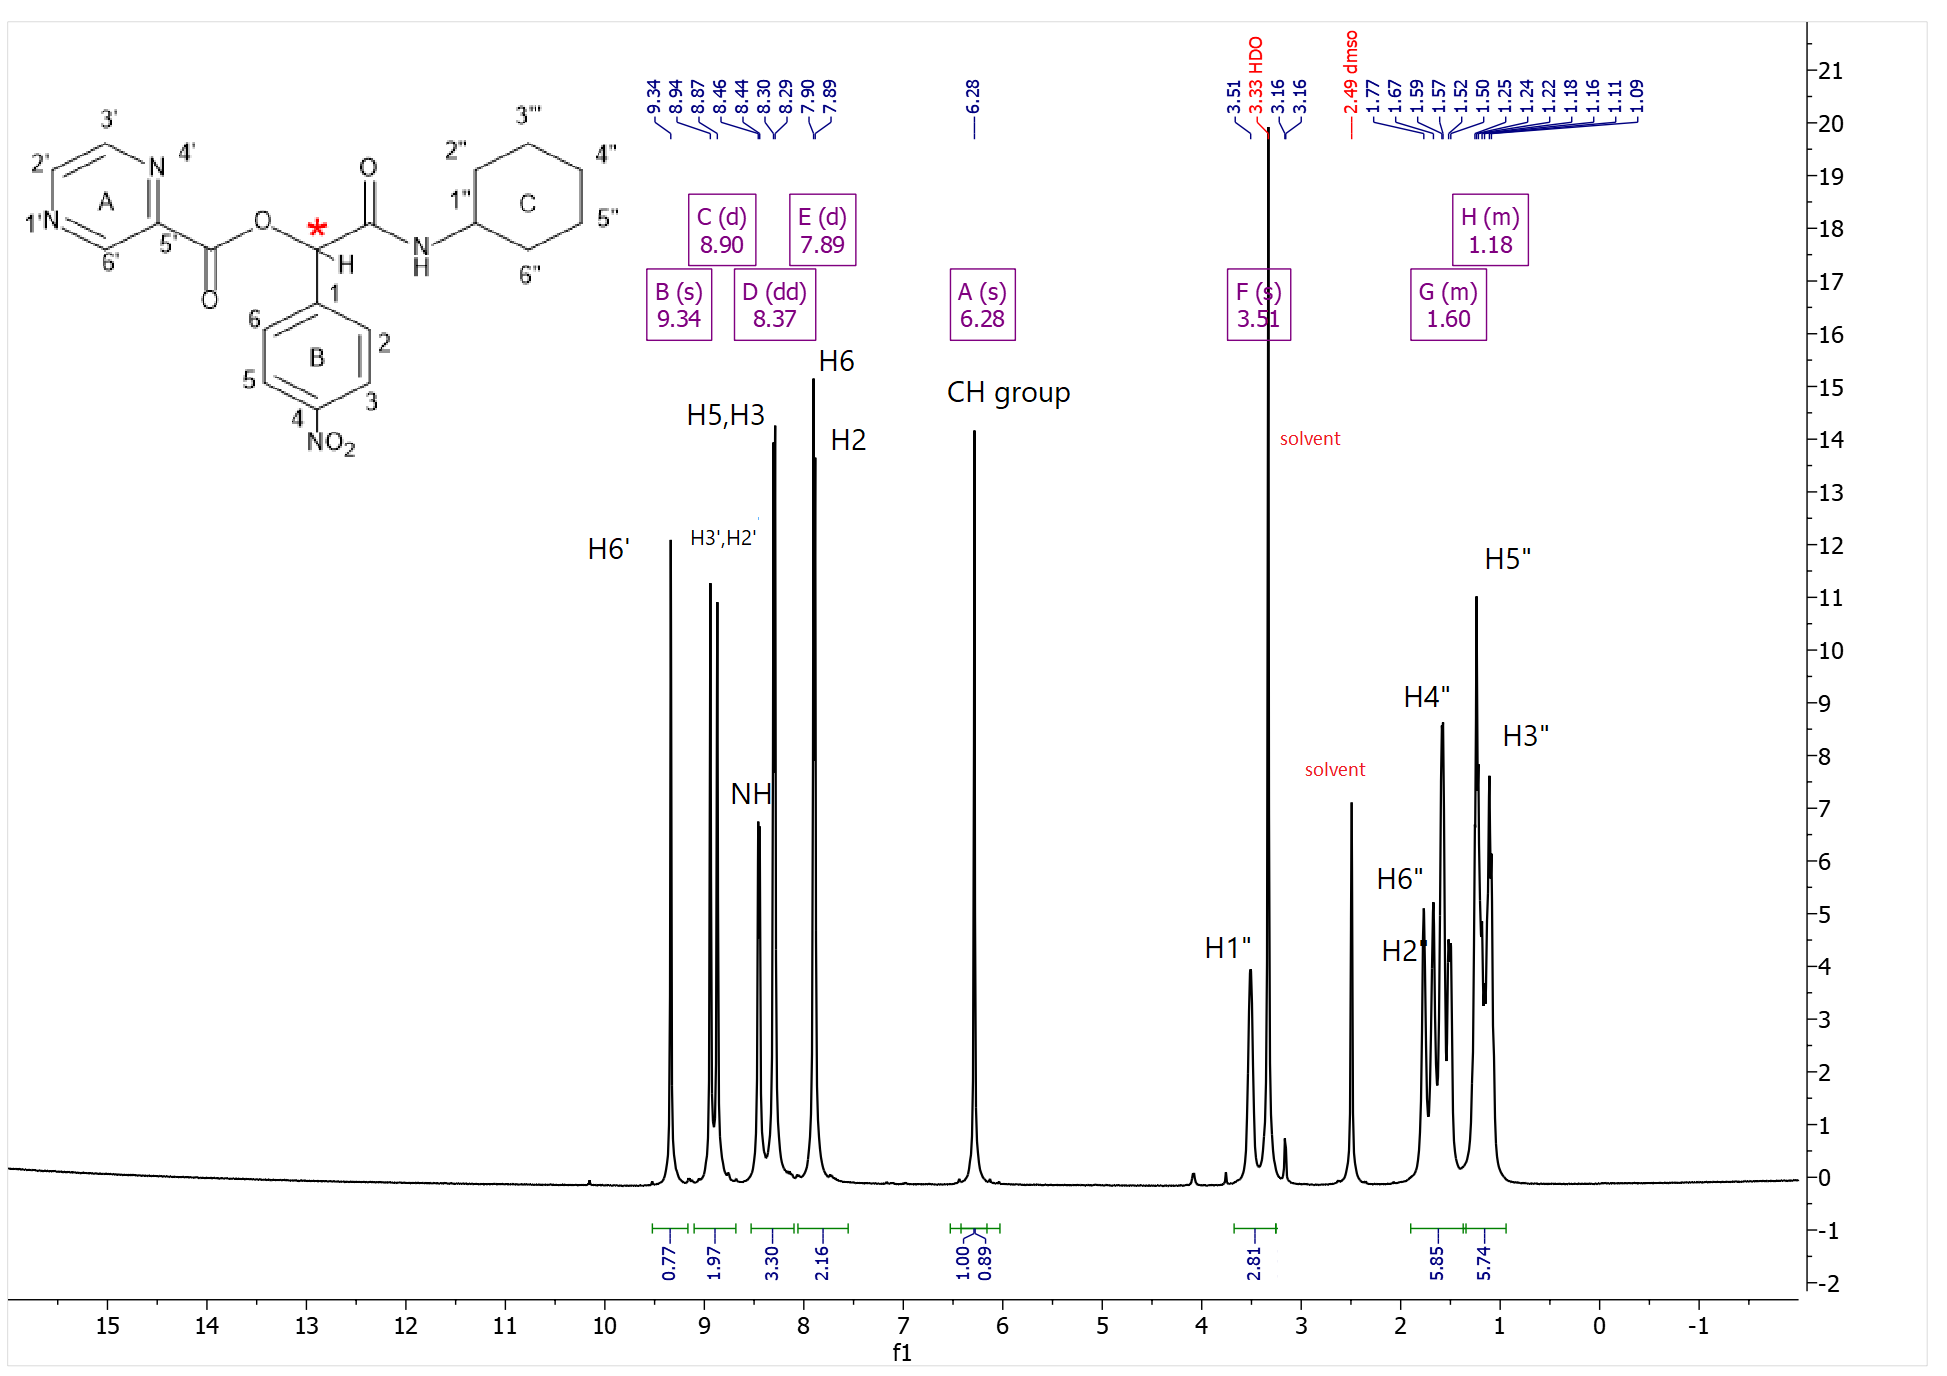


**Figure S29**. 1H-NMR spectrum of **P9**


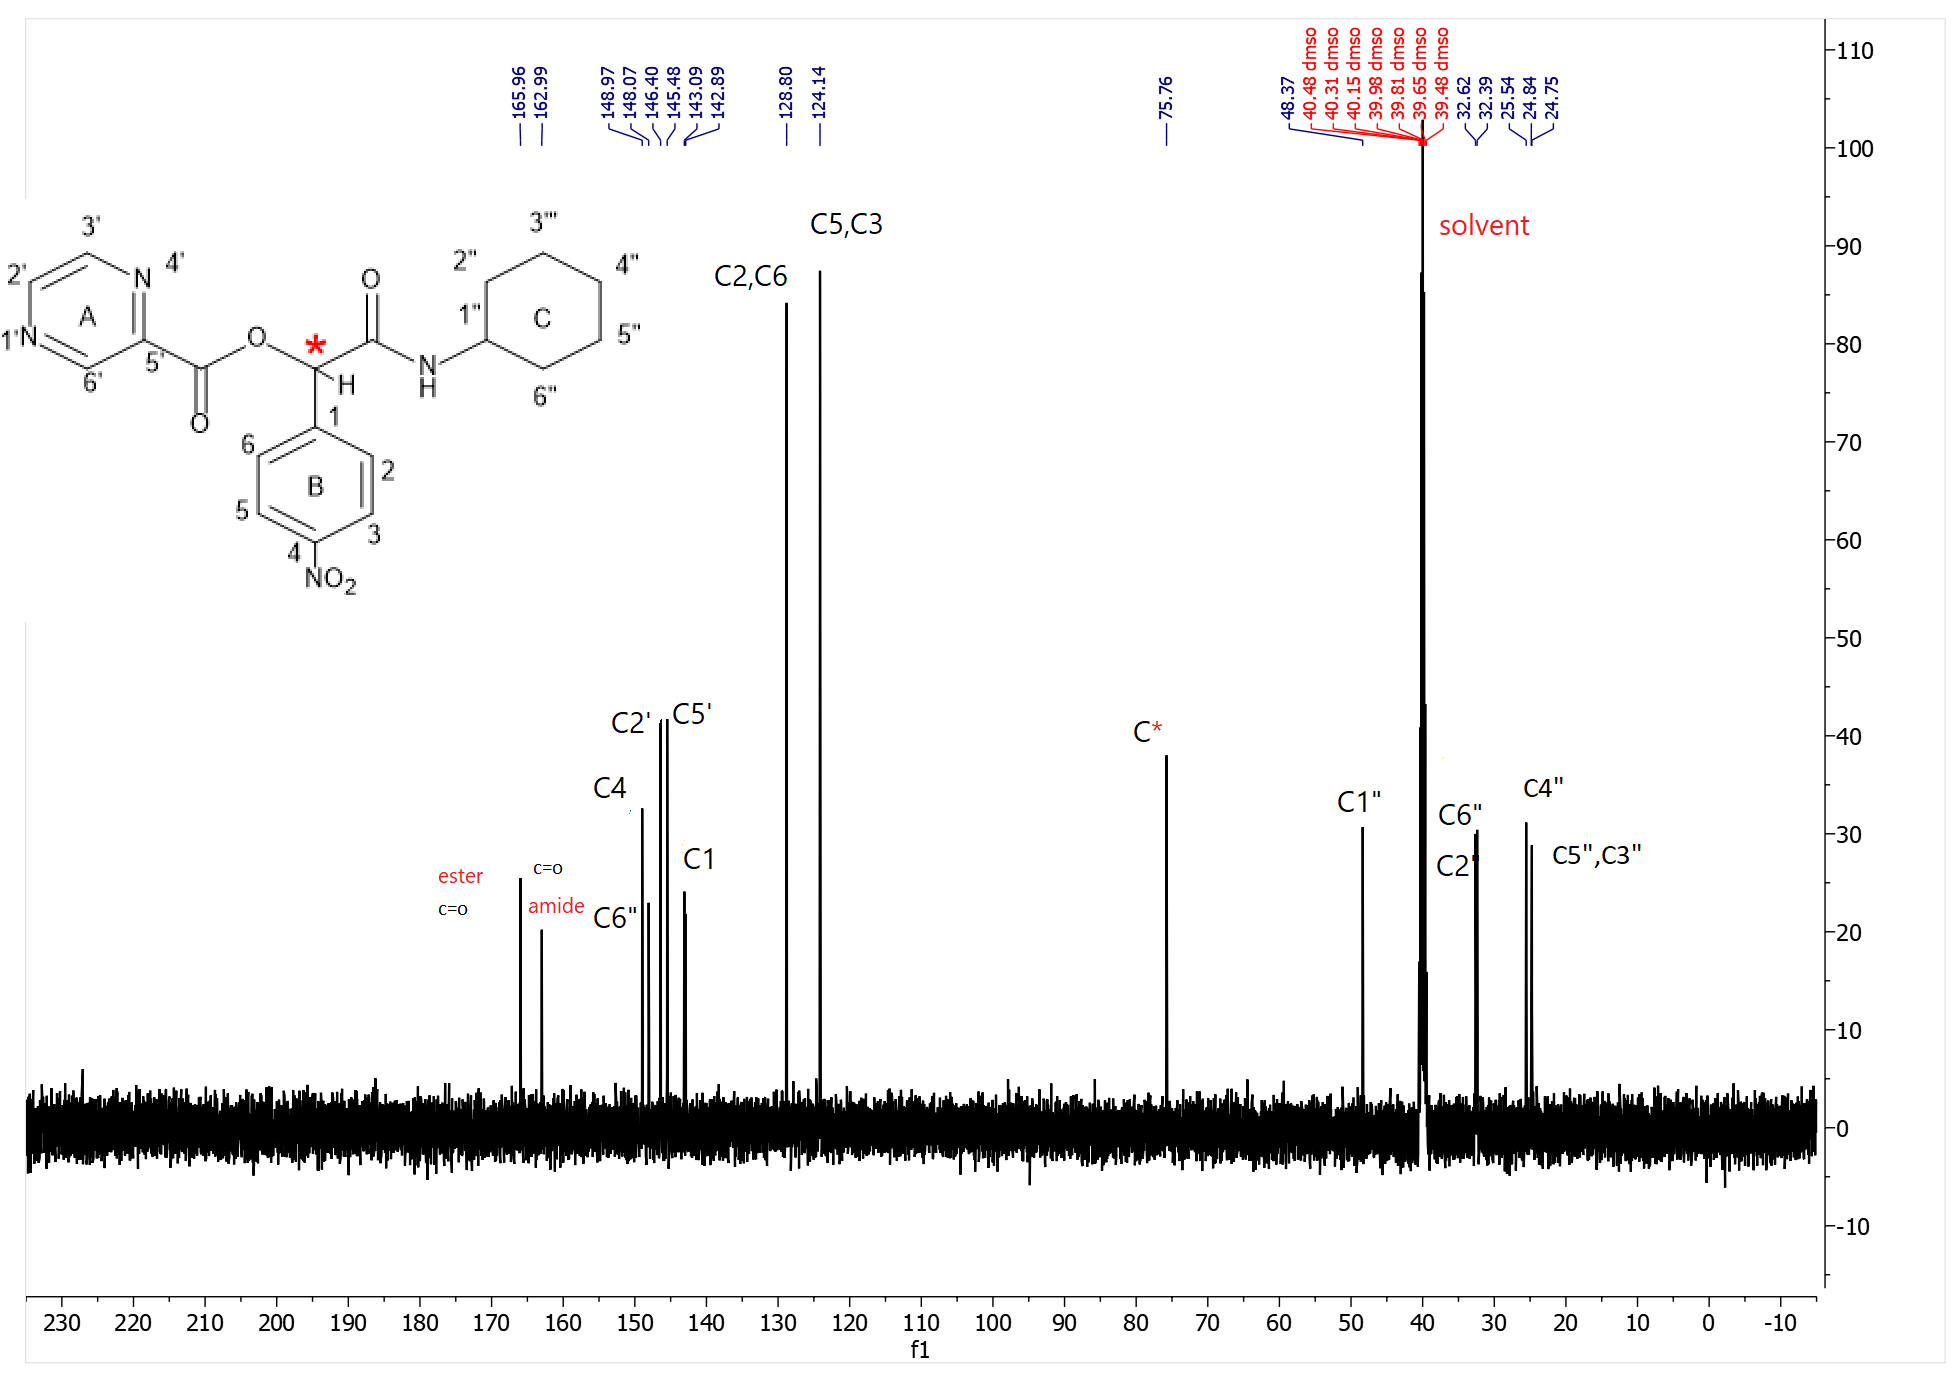


**Figure S30**. 13C-NMR spectrum of **P9**

**2-(cyclohexylamino)-1-(2,4-dinitrophenyl)-2-oxoethyl pyrazine-2-carboxylate(P10)**


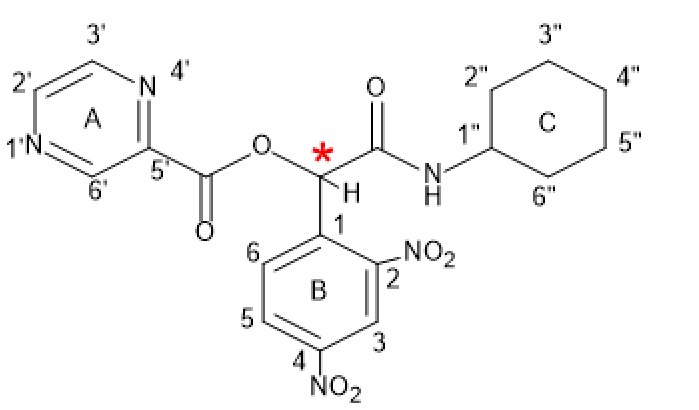


**P10**

Yield: 88%, mp: 197-199°C, white solid. IR (KBr disk): (3334.18 (NH amid group)), (3106.15 (CH aromatic)), (2937.88-2856.13 (CH aliphatic)), (1744.38 (C=O ester)), (1681. (C=O amid)), (1538.43 (NO2 symmetric stretch)), (1538.43-1450.11 (C=C aromatic)), (1348.34 (NO2 asymmetric stretch)), (1224.20 (C-O ester)) cm-1. 1H NMR (499 MHz, DMSO-*d*6) δ (9.31 (s, 1H) H6’, (9.09 – 8.69 (m, 3H) H2’,3’,3), (8.57 (d, *J* = 8.5 Hz, 1H)H5), (8.43 (d, *J* = 7.5 Hz, 1H) NH), (8.01 (d, *J* = 8.6 Hz, 1H) H6), (6.92 (s, 1H) CH*), (3.58 (s, 1H) H1”), (1.98 – 1.41 (m, 7H) H2”,4”,6”), 1.18 (ddd, *J* = 44.5, 20.2, 9.3 Hz, 3H) H5”,3”). 13C NMR (126 MHz, dmso) δ 164.56, 162.91, 149.08, 148.79, 148.07, 146.54, 145.52, 142.70, 136.69, 131.23, 128.50, 120.75, 71.88, 48.82, 40.31, 40.14, 39.97, 39.81, 39.64, 32.47, 32.44, 25.54, 24.86. Elemental analysis calcd (%) for C19H19N5O7 (429.19):C,53.15; H,4.46; N,16.31;found: C,53.22;H,4.53;N,16.38.


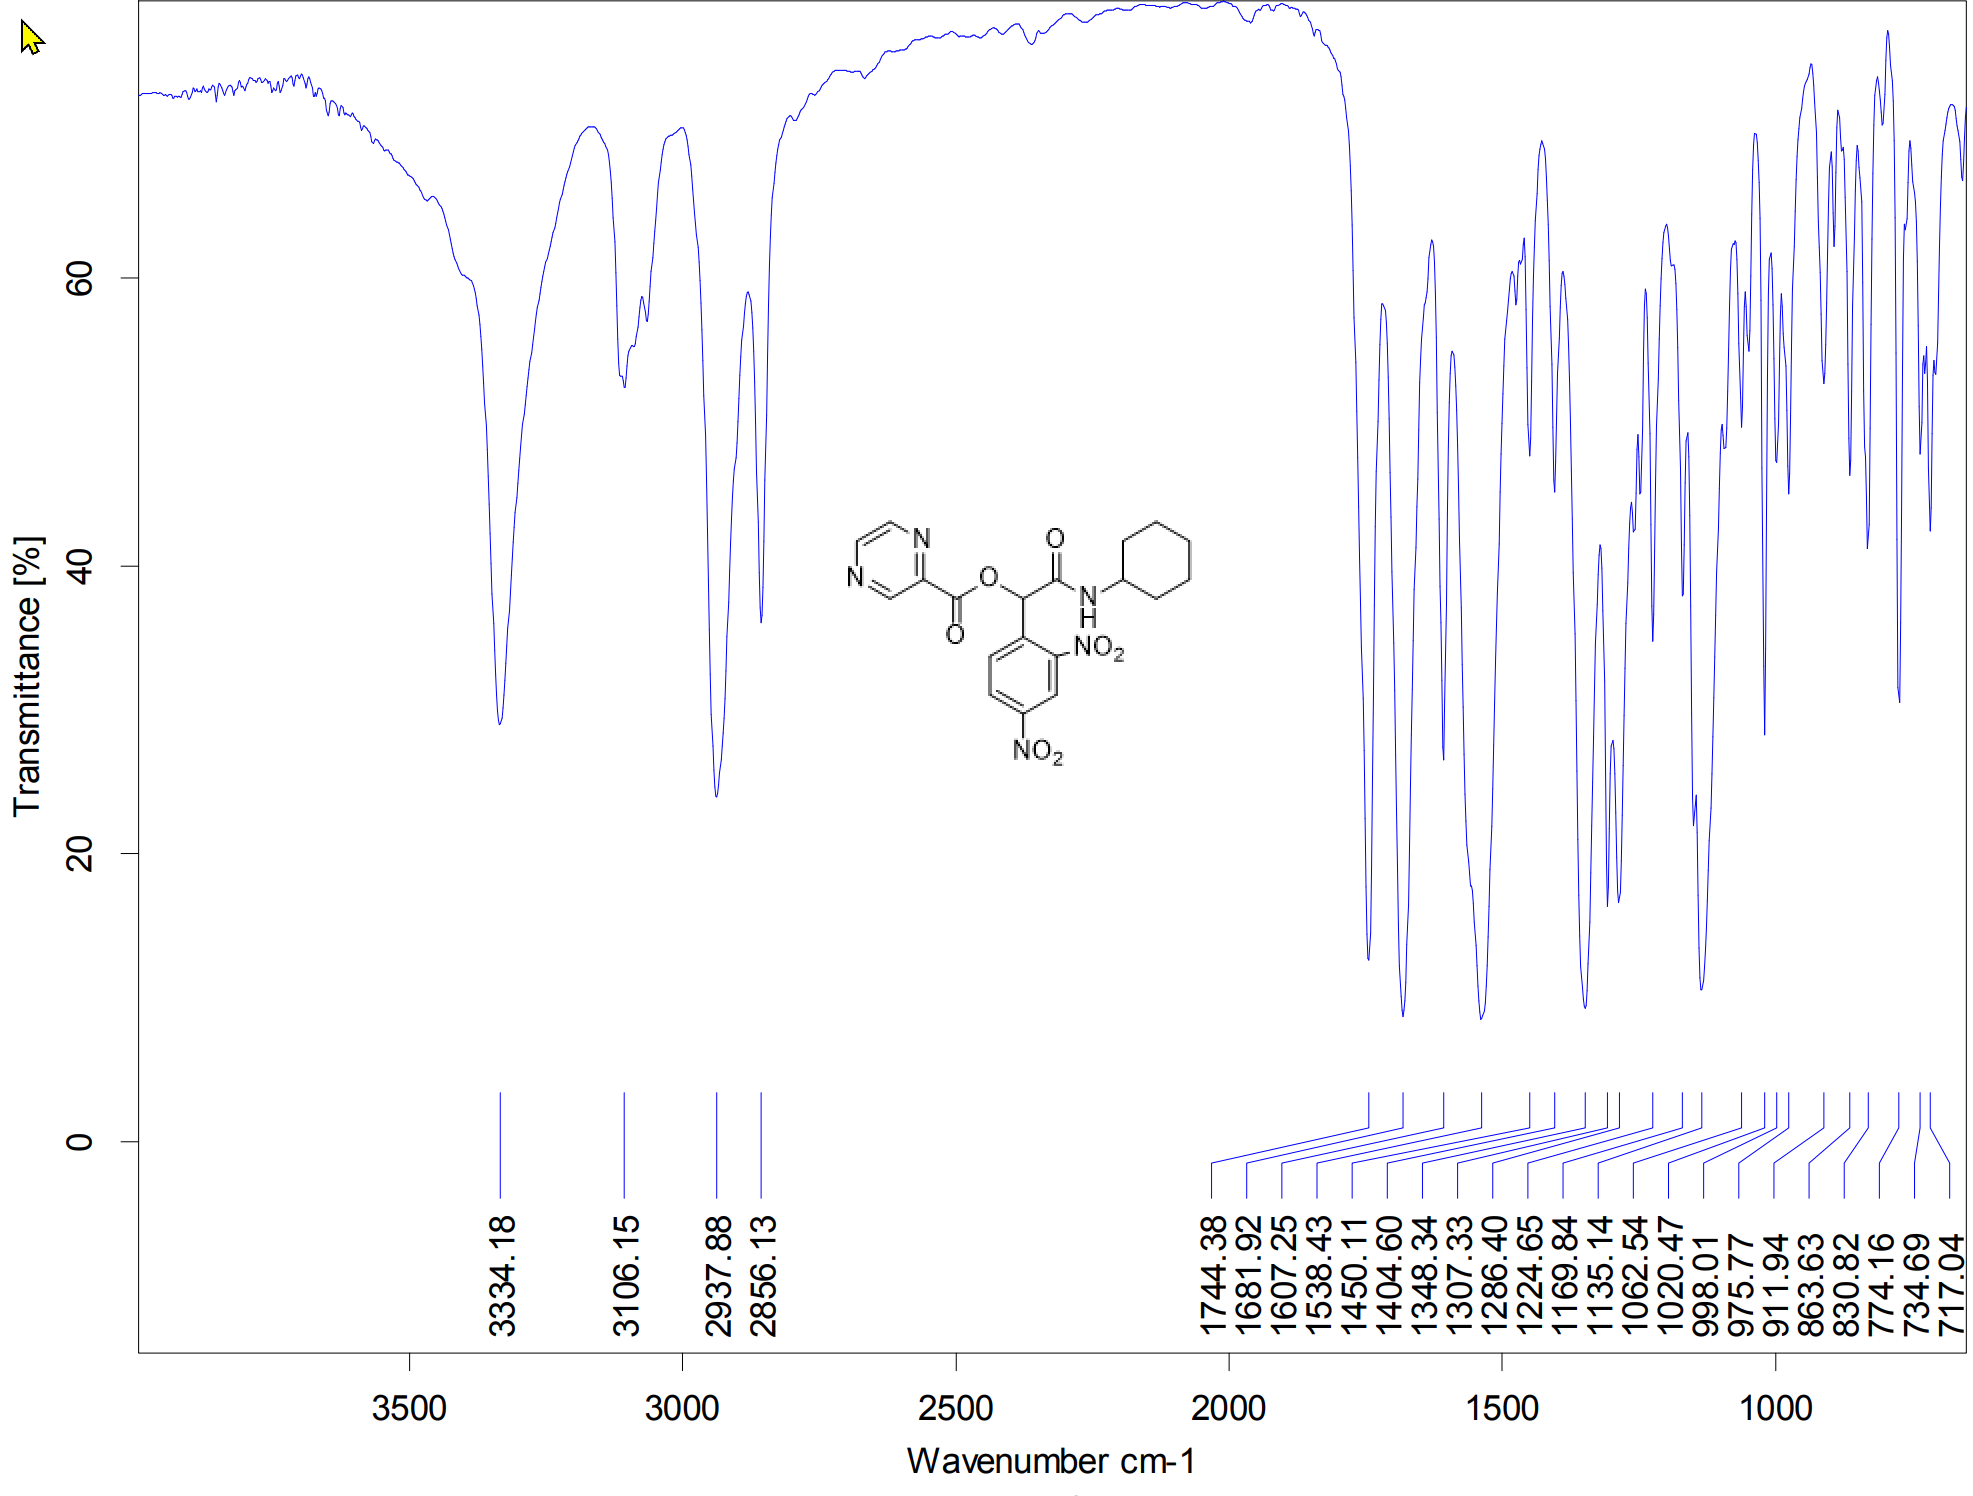


**Figure S31**. IR spectrum of **P10**


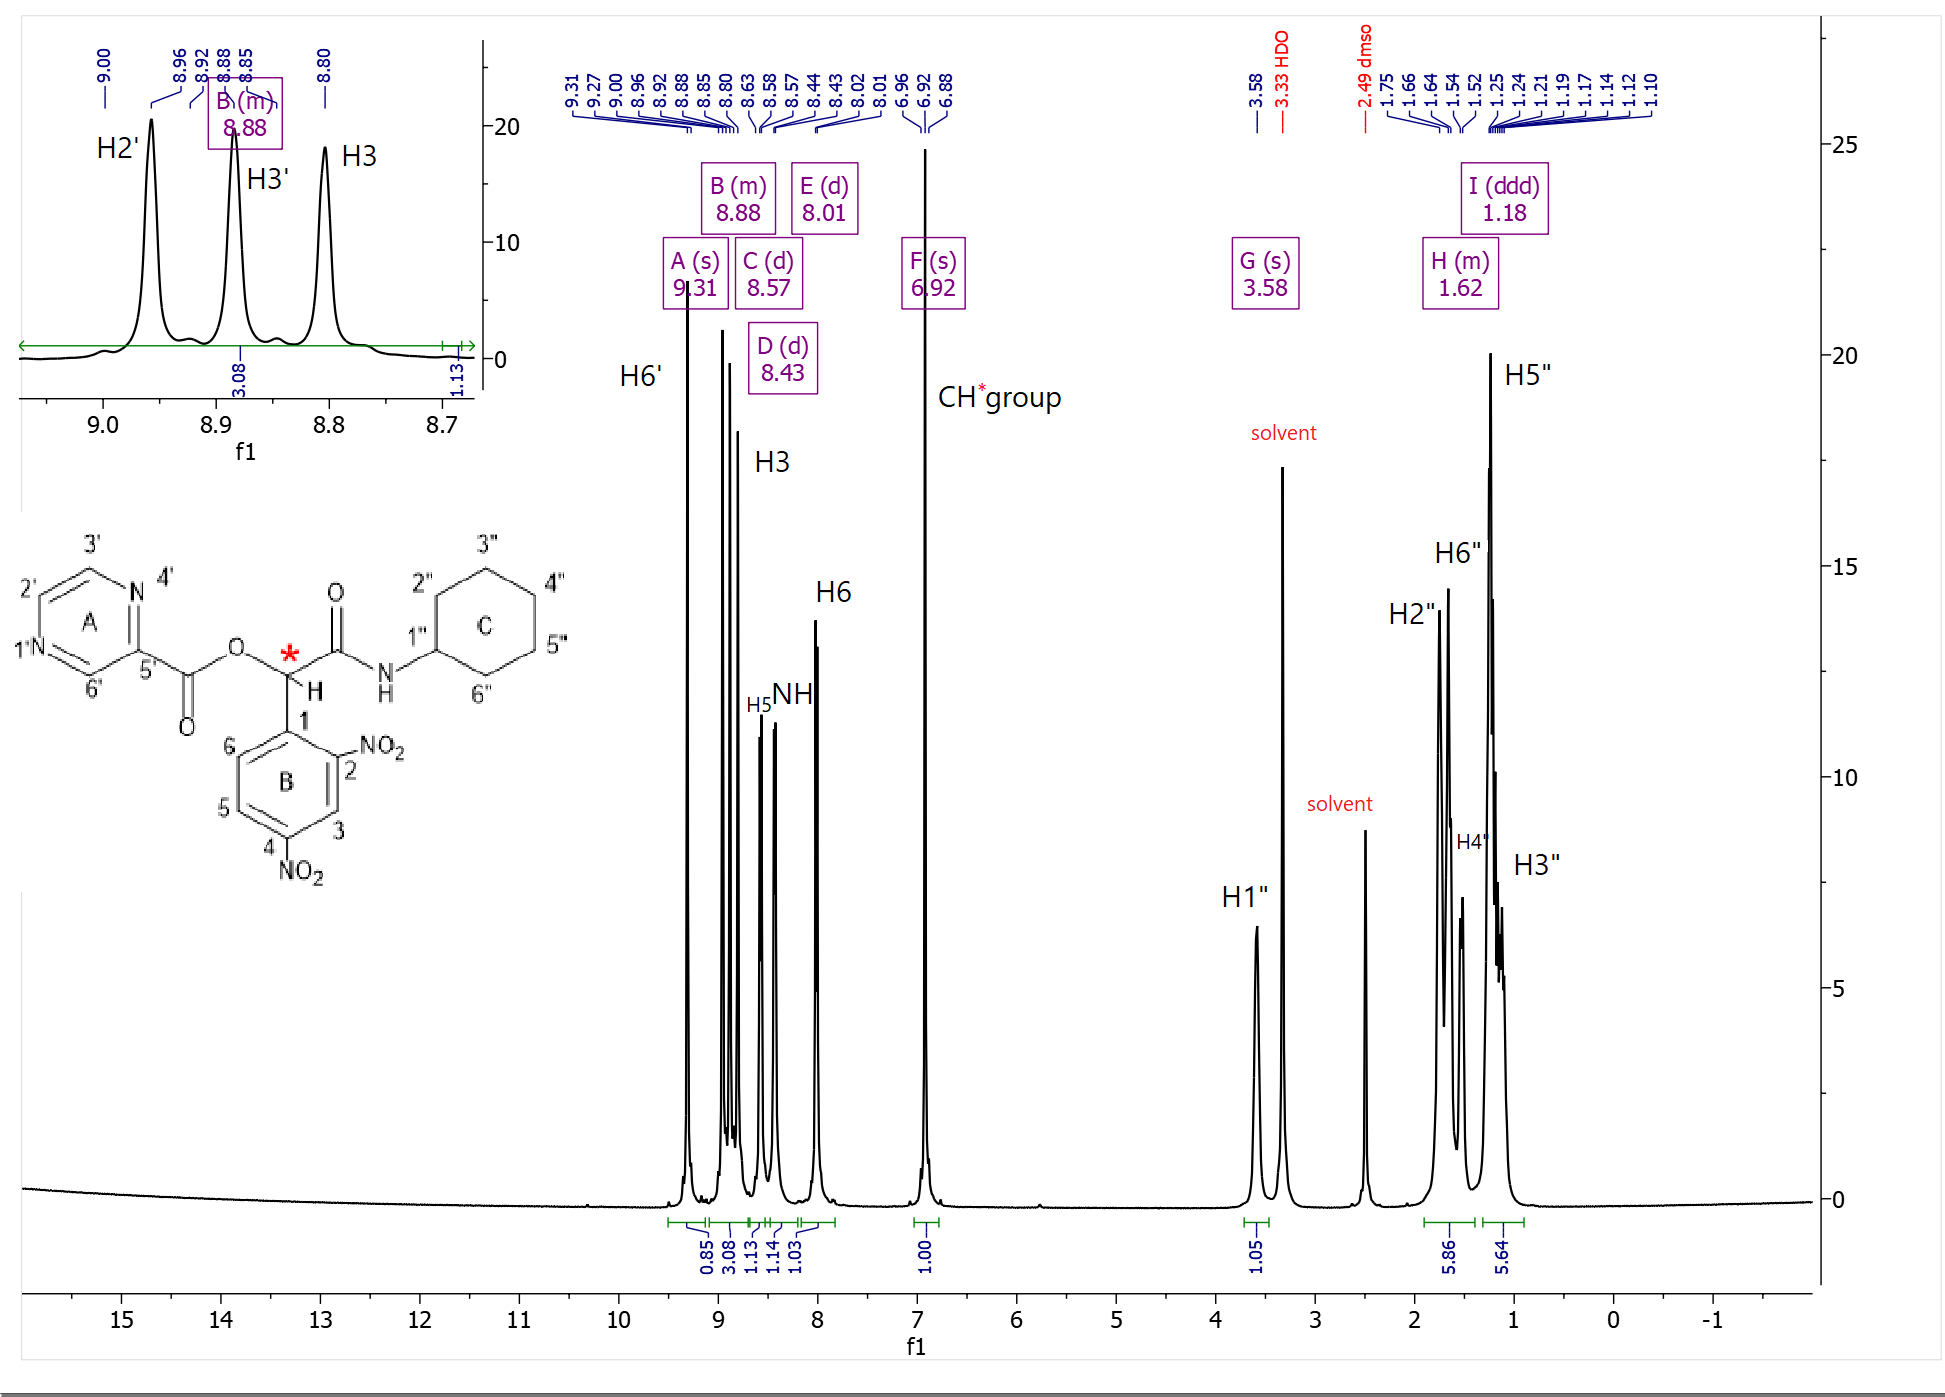


**Figure S32**. 1H-NMR spectrum of **P10**


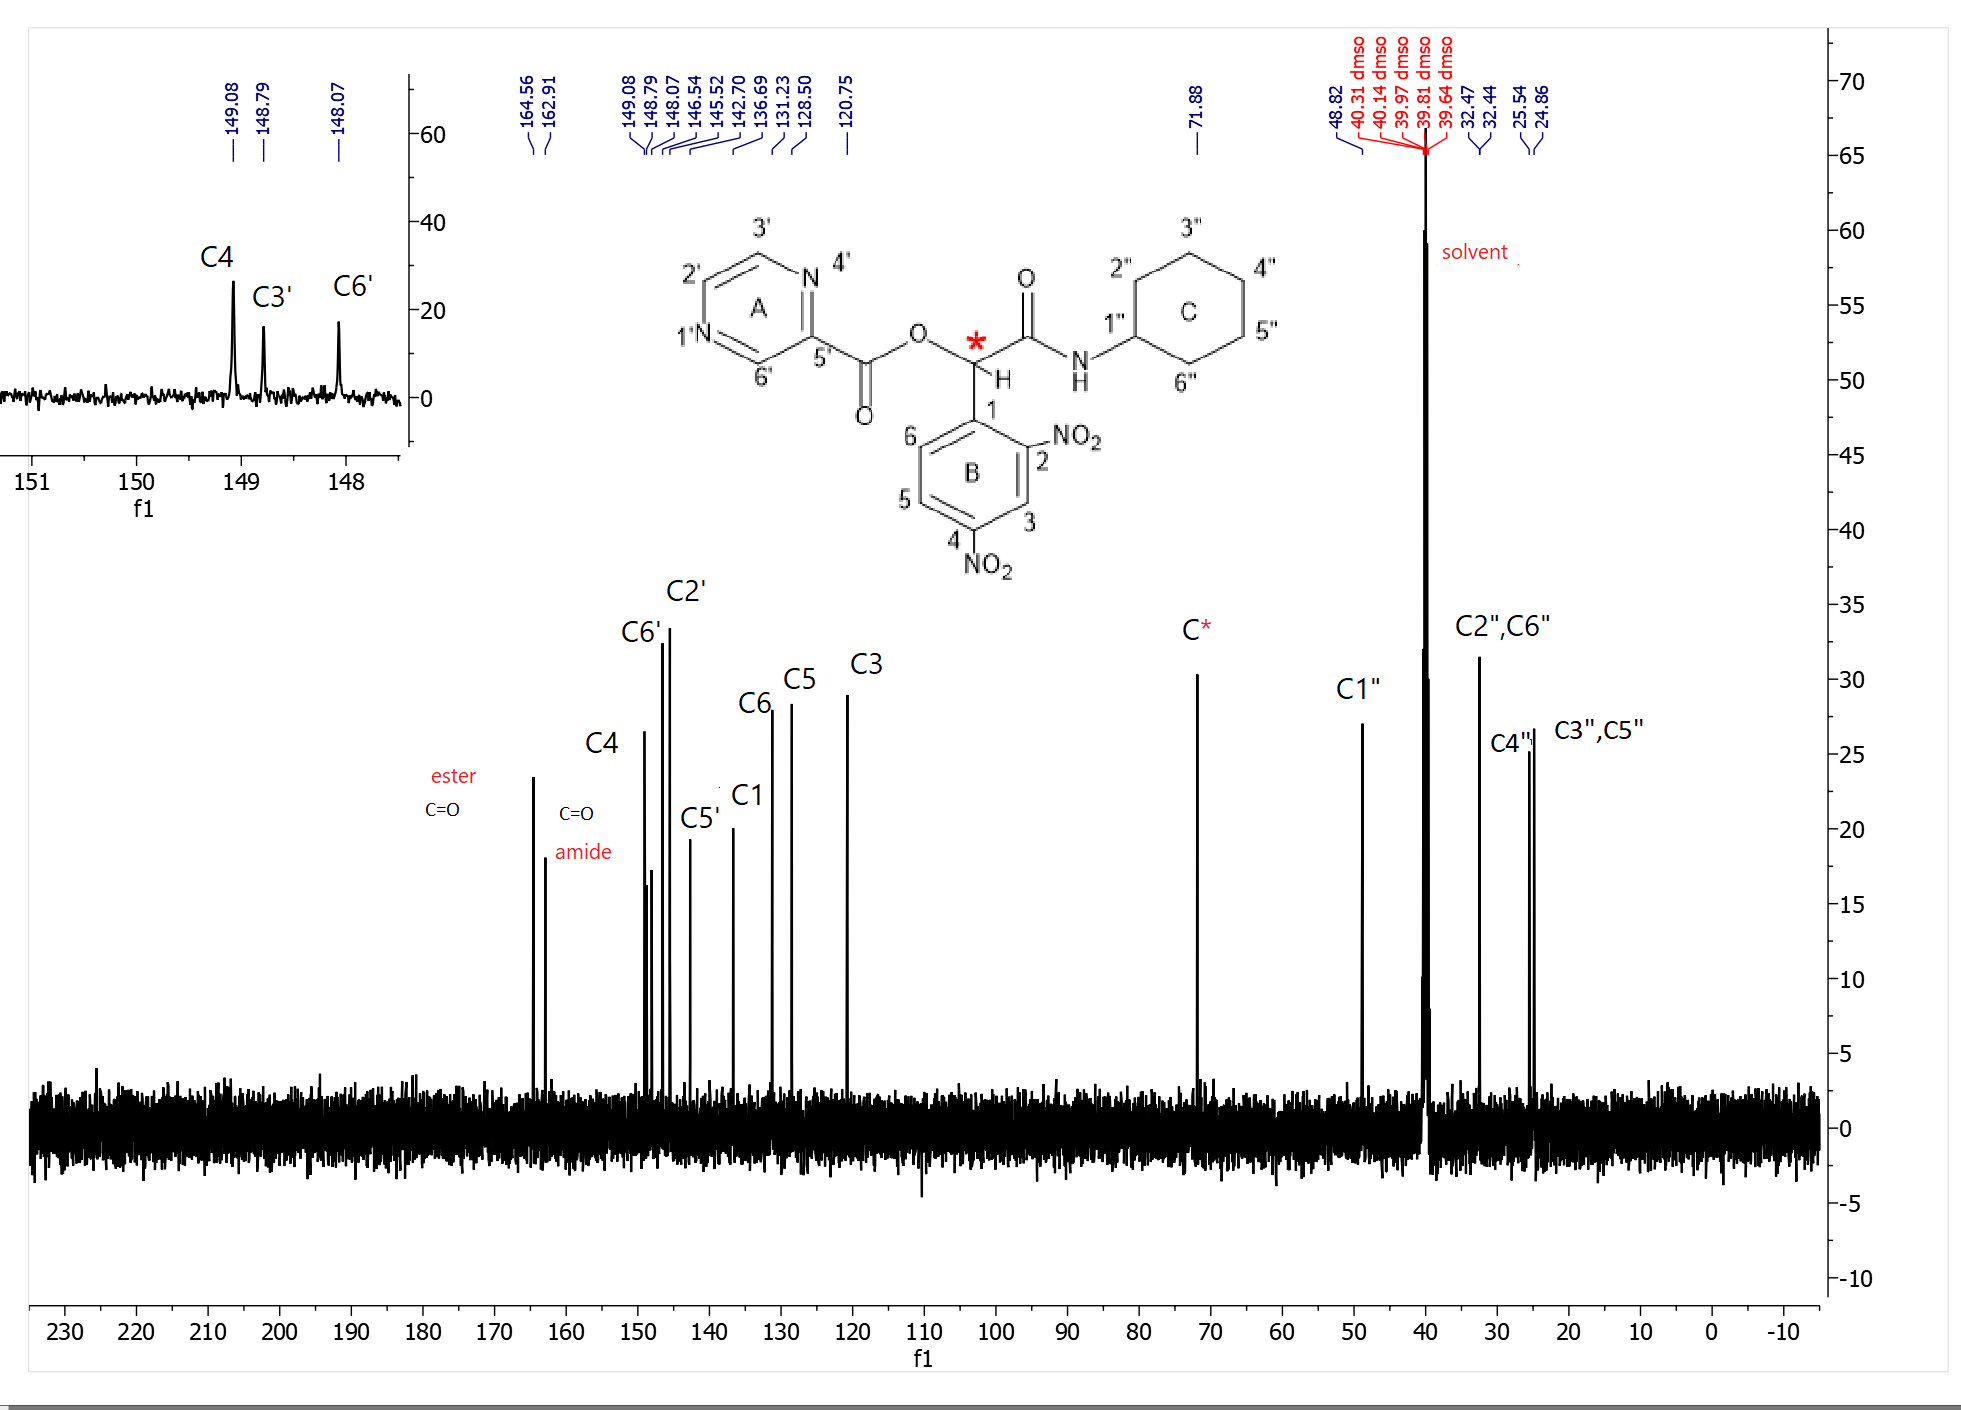


**Figure S33**. 13C-NMR spectrum of **P10**


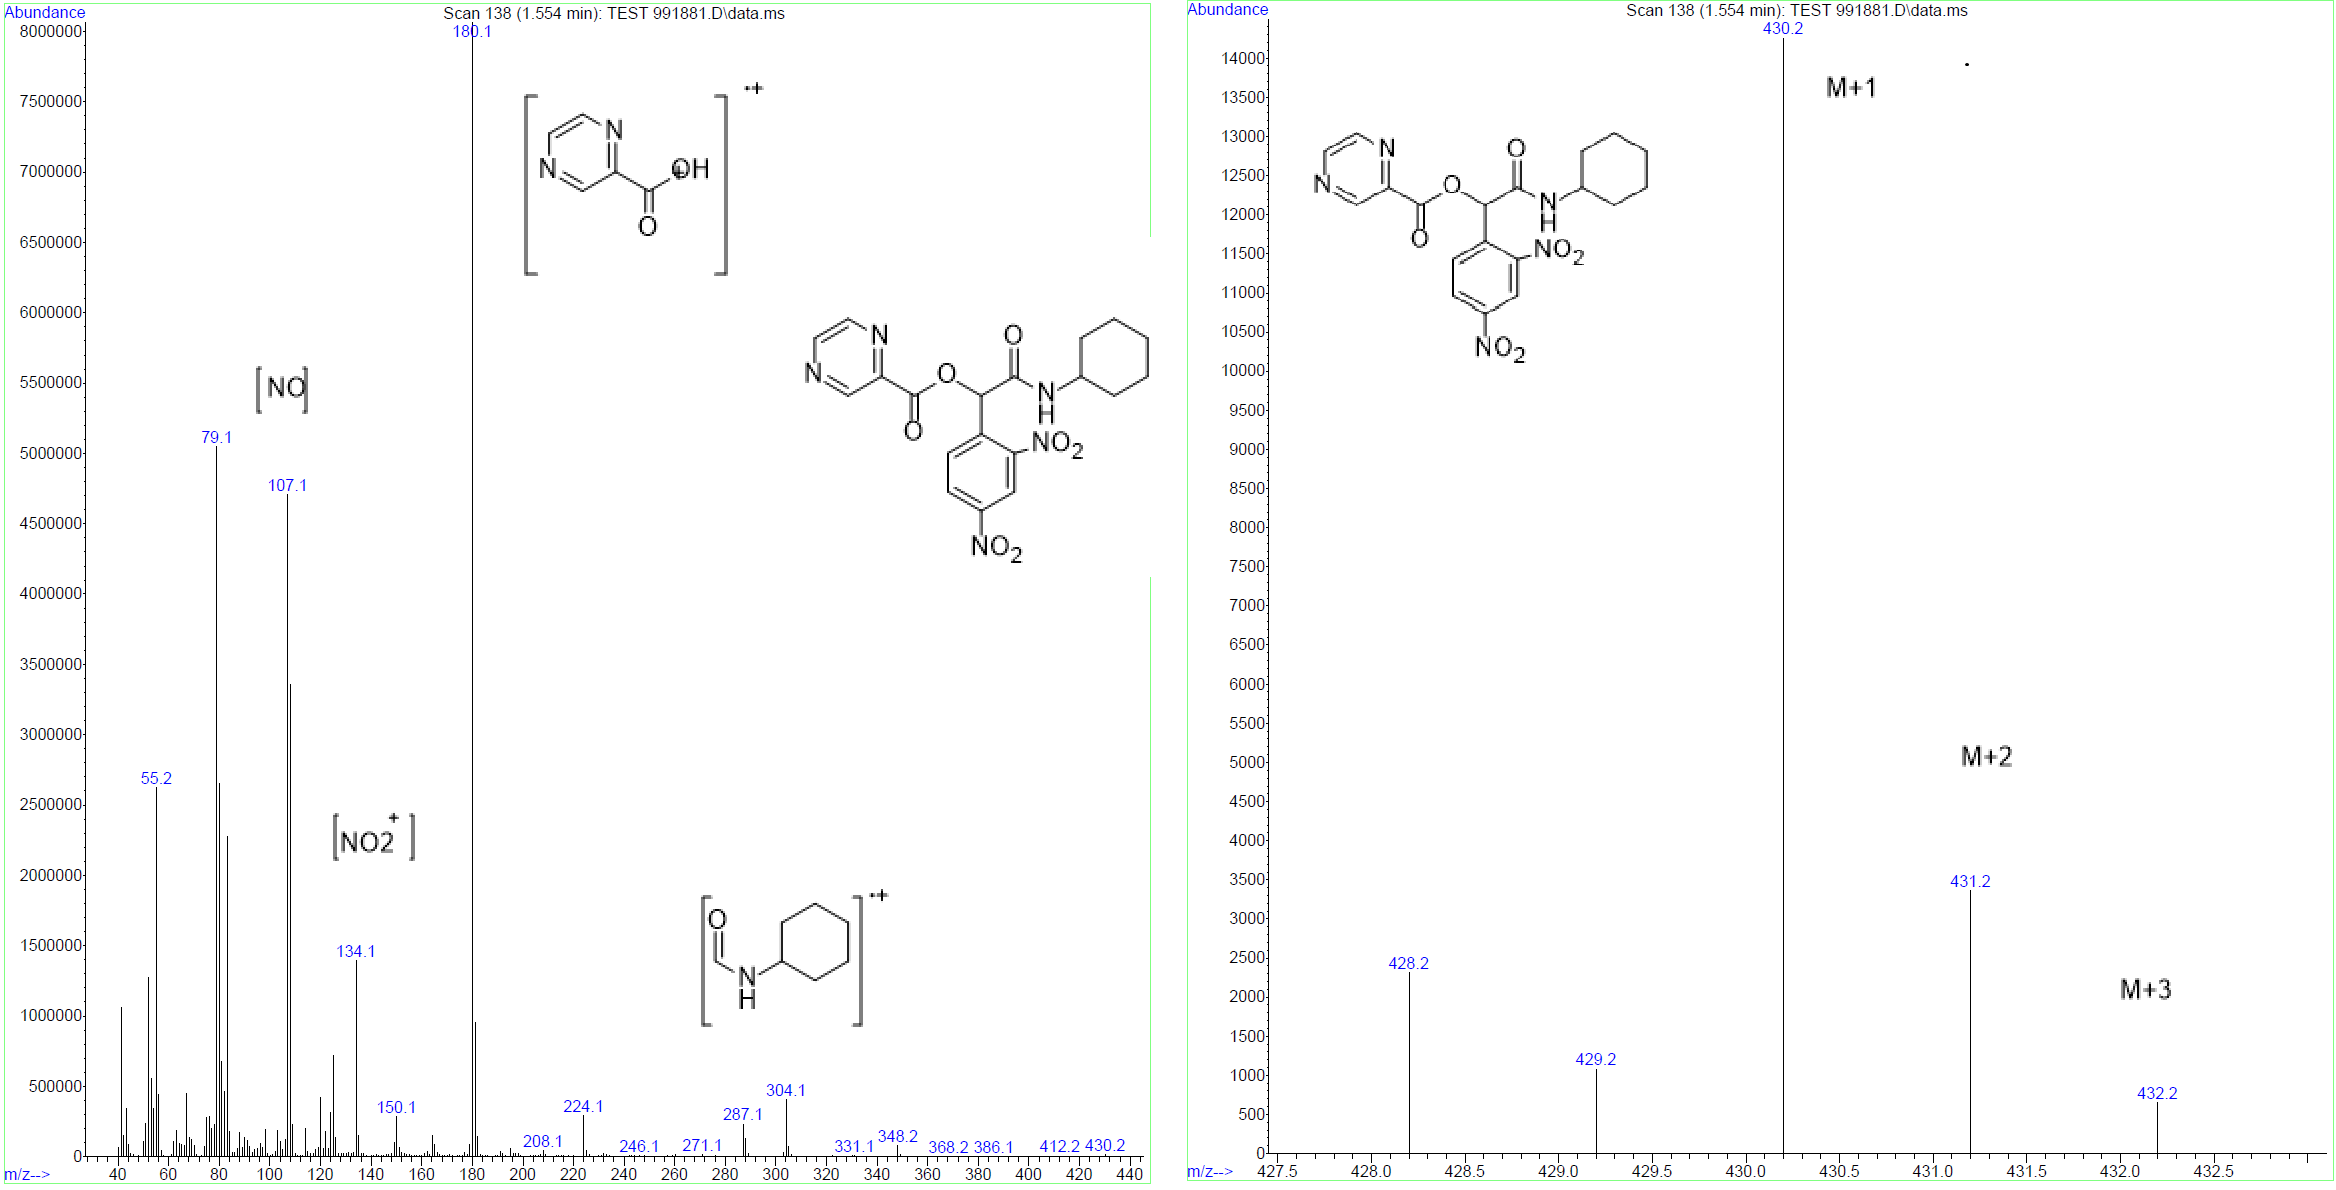
 **Figure S34**. Mass spectrum of **P10**

**2-(cyclohexylamino)-1-(2-fluorophenyl)-2-oxoethyl pyrazine-2-carboxylate(P11)**


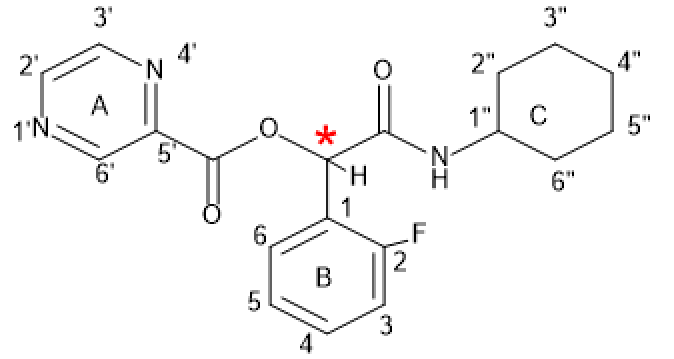


**P11**

Yield: 55%, mp: 143-145°C, white solid. IR (KBr disk): (3265.97 (NH amid group)), (3100.43 (CH aromatic)), (2930.03-2854.01 (CH aliphatic)), (1718.87 (C=O ester)), (1656.95 (C=O amid)), (1569.89-1510.03 (C=C aromatic)), (1187.89 (C-O)), (C-F (967.65)) cm-1. 1H NMR (499 MHz, DMSO-d6) δ (9.26 (s, 1H) H6’, 8.87 (d, *J* = 43.6 Hz, 2H) H3’.2’), (8.28 (d, *J* = 7.6 Hz, 1H) NH), (7.68 – 7.40 (m, 1H) H5), (7.36 – 7.06 (m, 1H) H6), (6.40 (s, 1H) CH*), (3.70 – 3.44 (m, 1H) H1”), (1.85 – 1.41 (m, 7H) H2”,4”,6”), (1.19 (ddd, *J* = 44.5, 22.4, 11.2 Hz, 5H) H5”,3”). 13C NMR (126 MHz, dmso) δ 165.74, 163.18, 161.73, 159.76, 148.90, 146.32, 145.40, 142.94, 131.78, 131.72, 130.12, 125.16, 123.30, 123.19, 116.20, 116.03, 70.68, 48.46, 40.49, 40.32, 40.15, 39.98, 39.82, 39.65, 39.48, 32.54, 32.49, 25.57, 24.98, 24.93. Elemental analysis calcd (%) for C19H20FN3O3 (357.15):C,63.85; H,5.64; N,11.76;found: C,63.90;H,5.69;N,11.81.


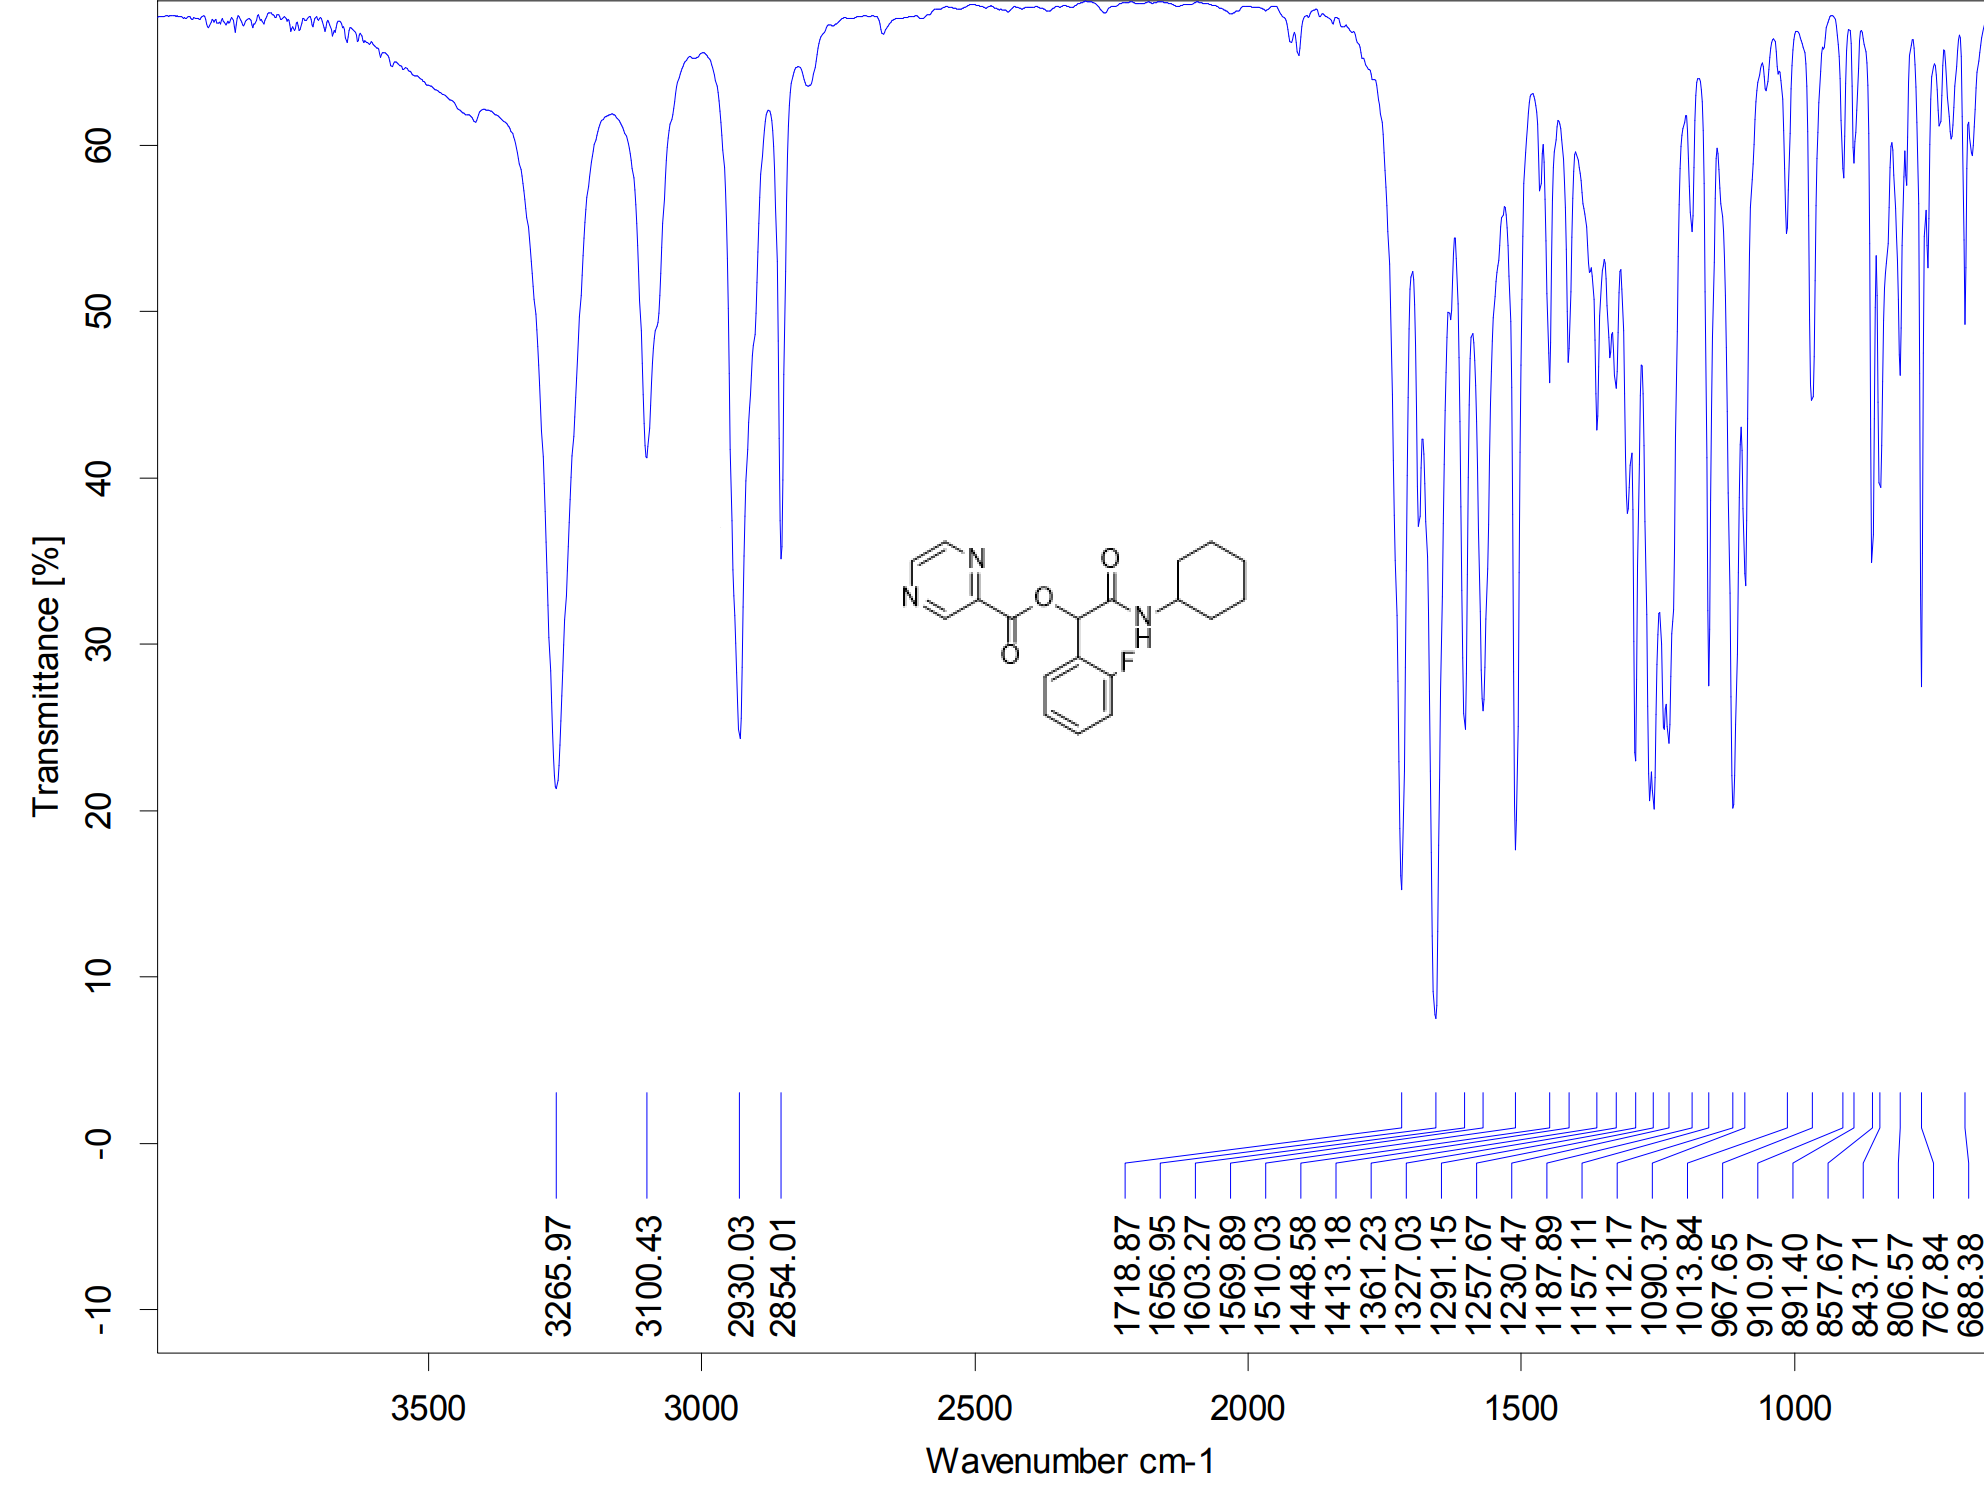


**Figure S35**. IR spectrum of **P11**


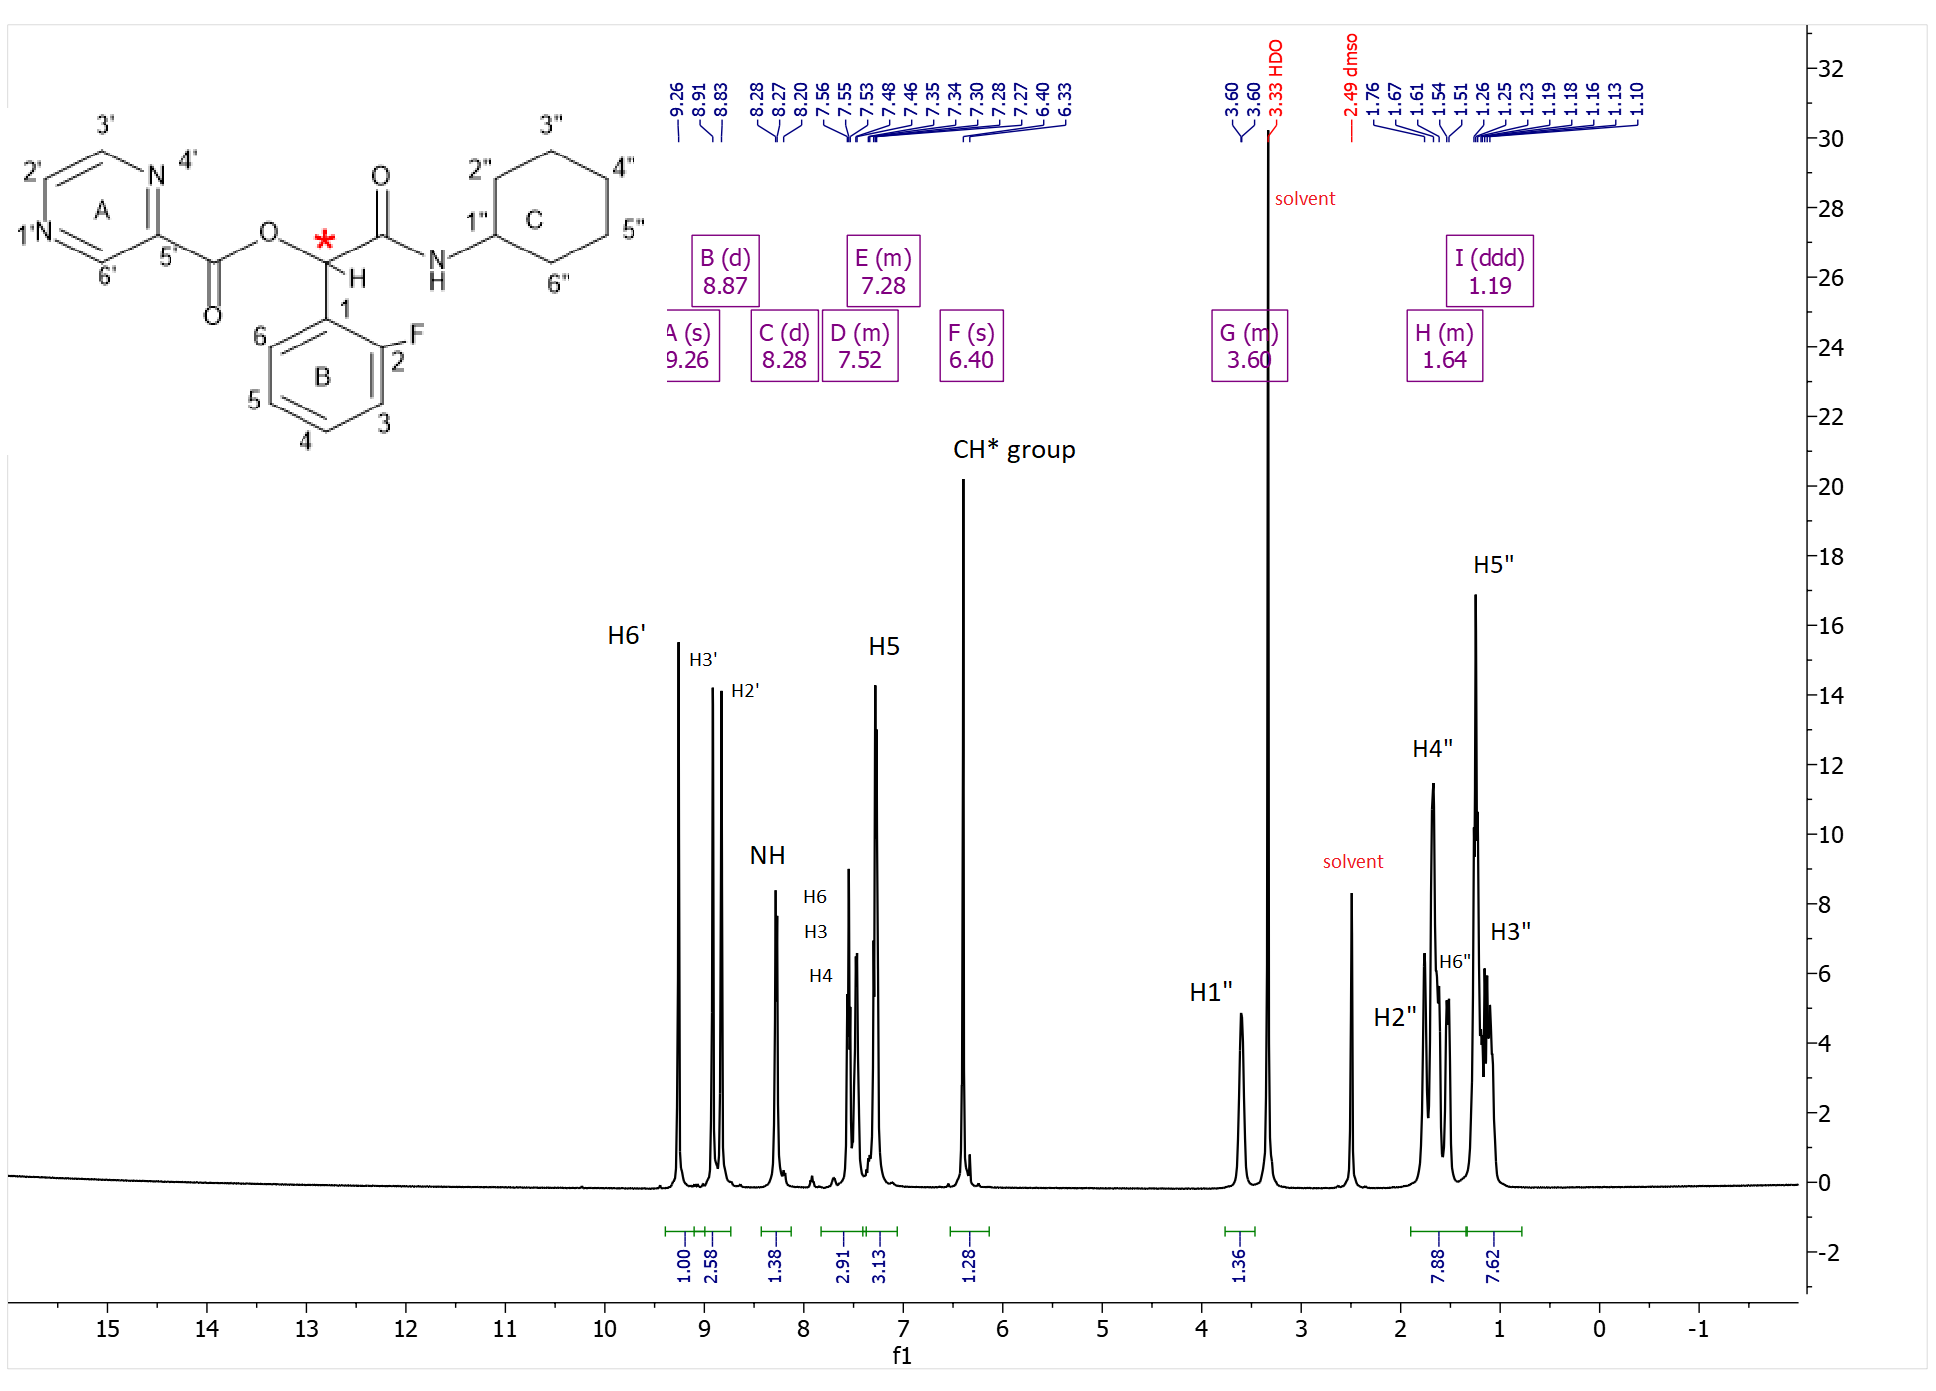


**Figure S36**. 1H-NMR spectrum of **P11**


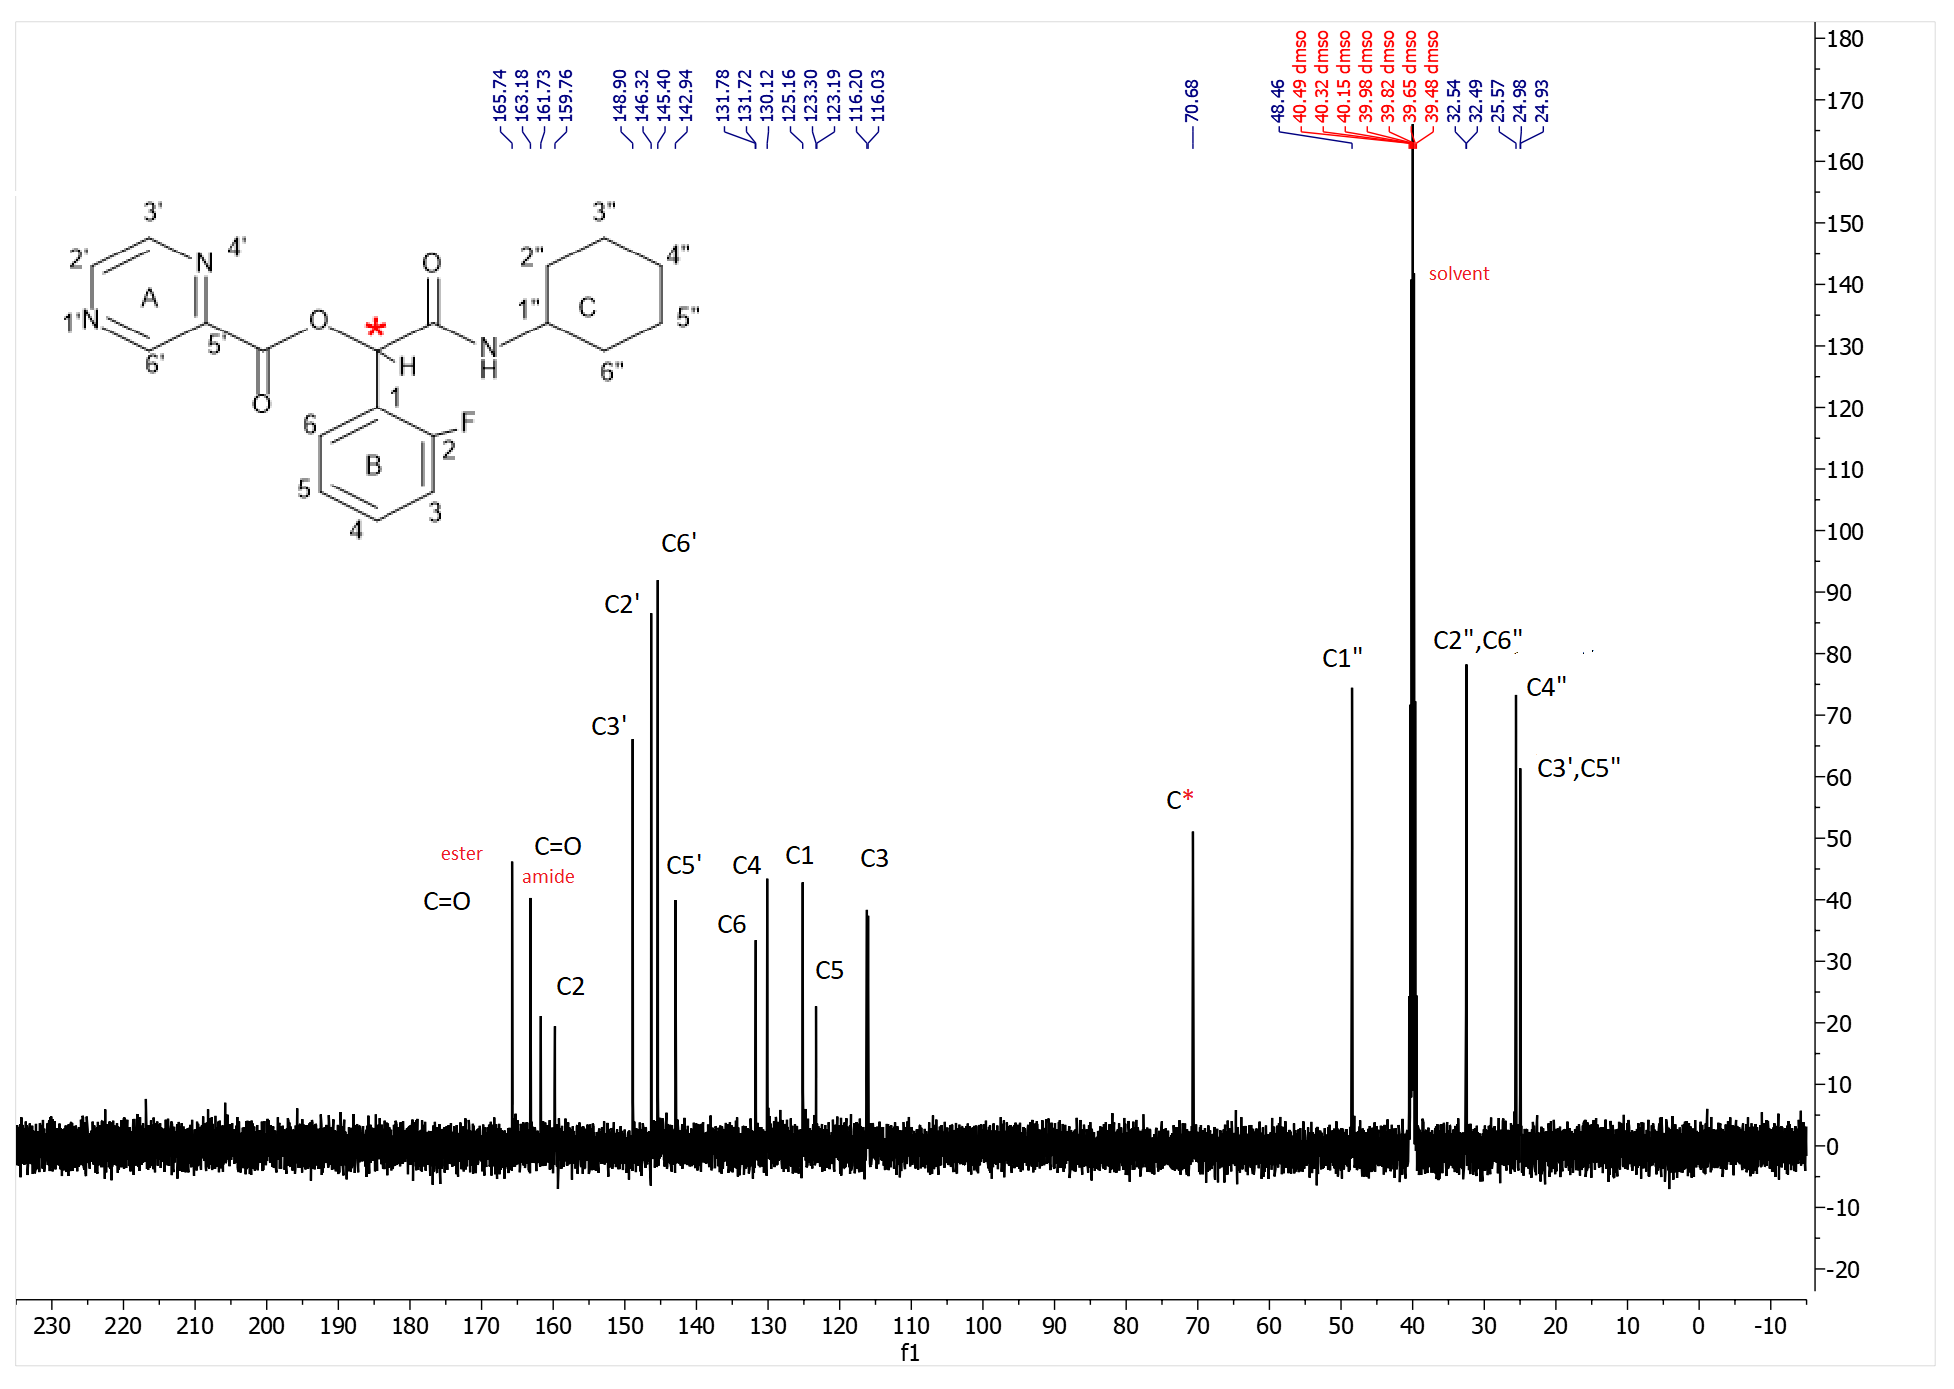


**Figure S37**. 13C-NMR spectrum of **P11**


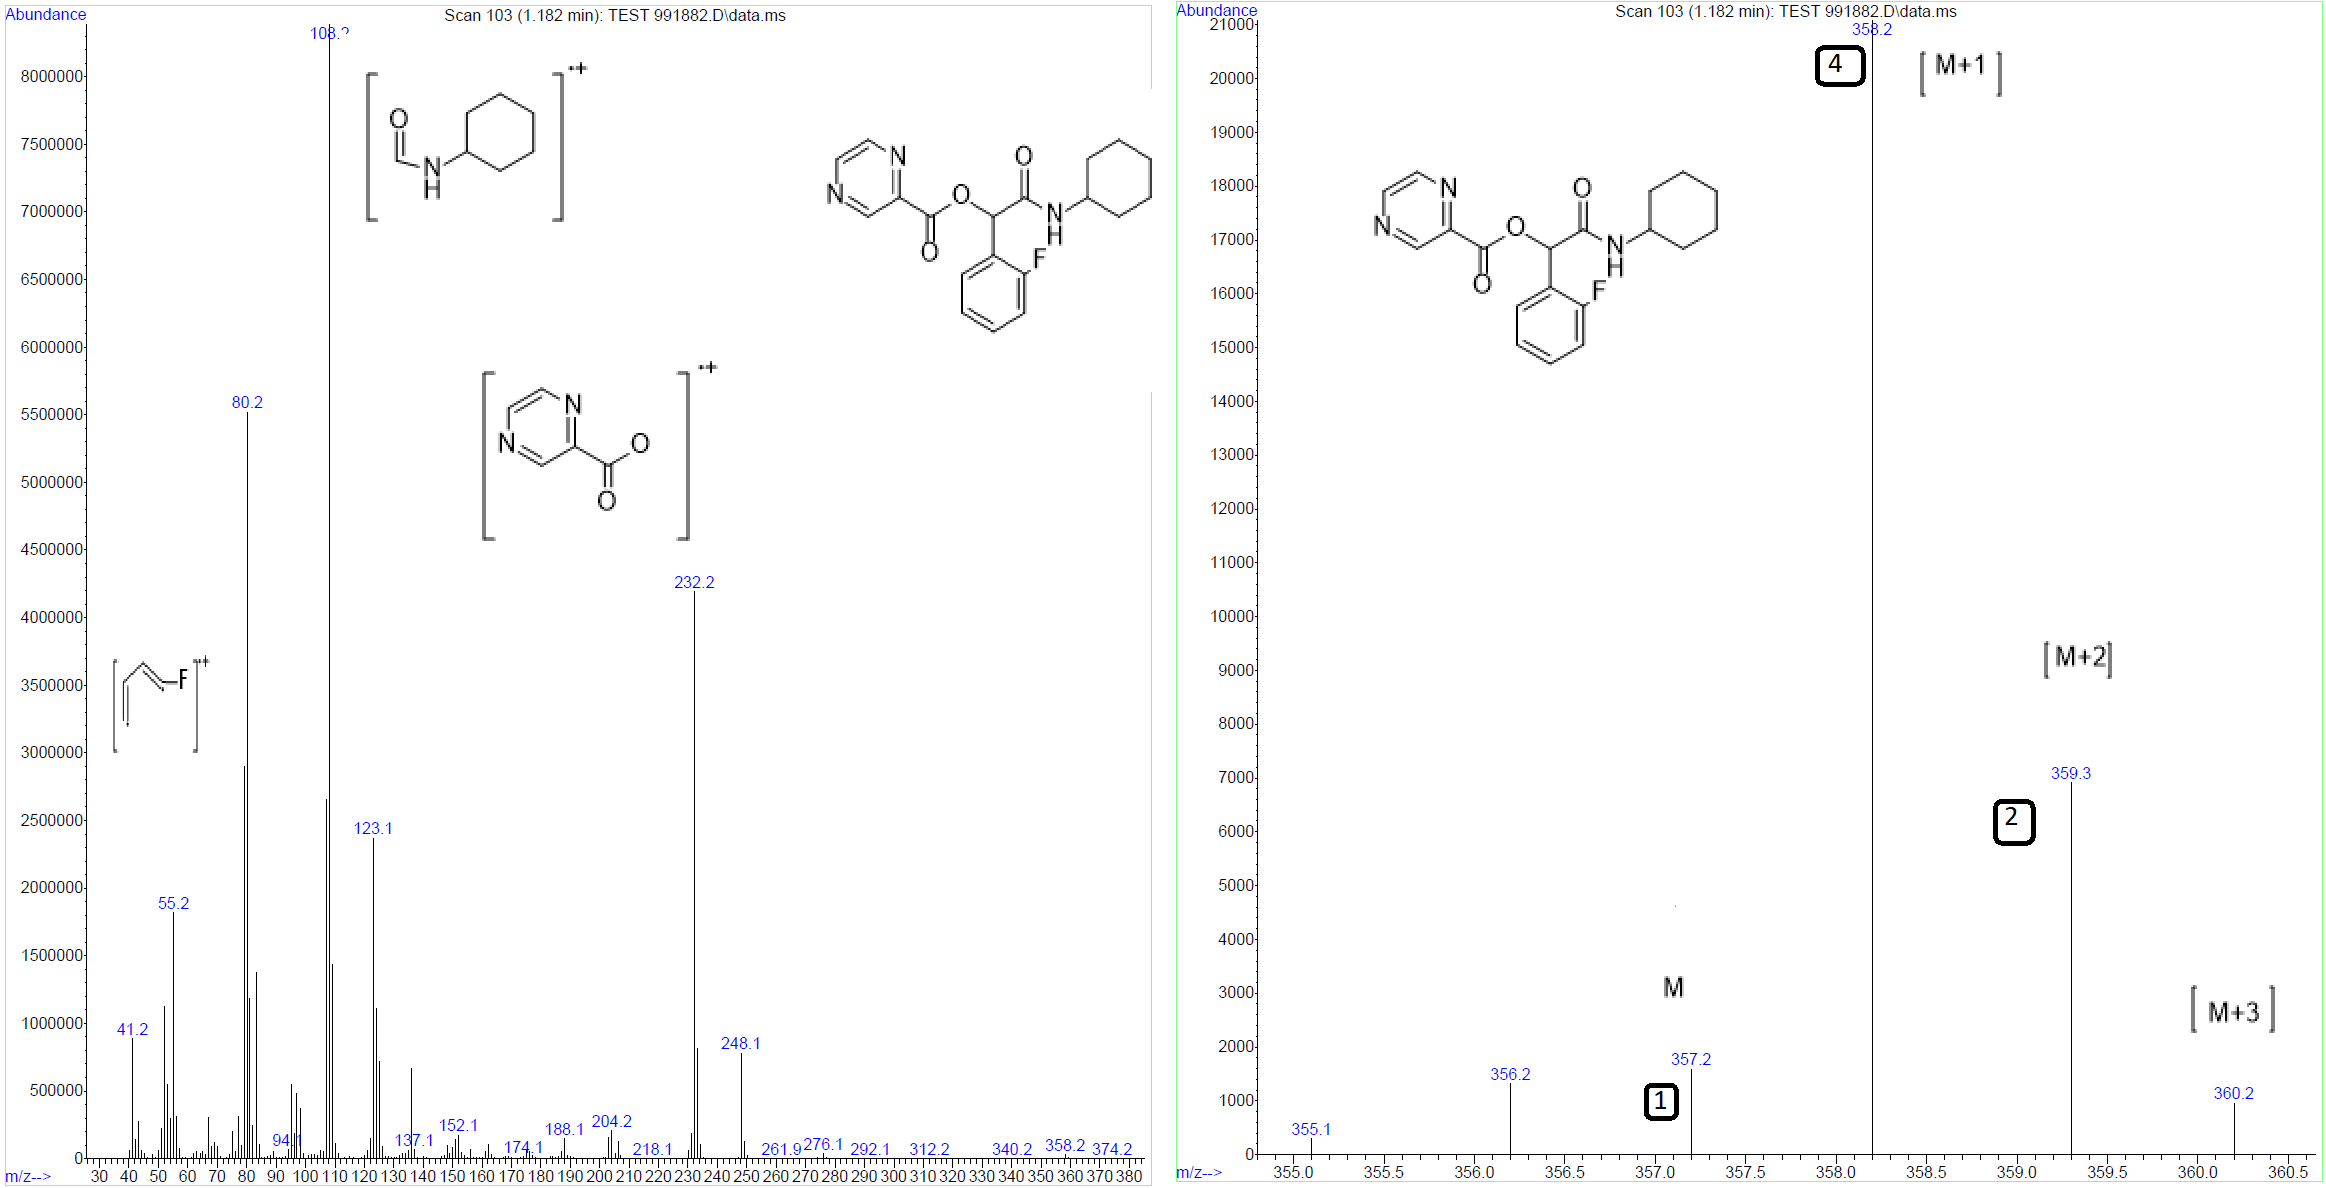


**Figure S38**. Mass spectrum of **P11**

**2-(cyclohexylamino)-1-(3-fluorophenyl)-2-oxoethyl pyrazine-2-carboxylate(P12)**


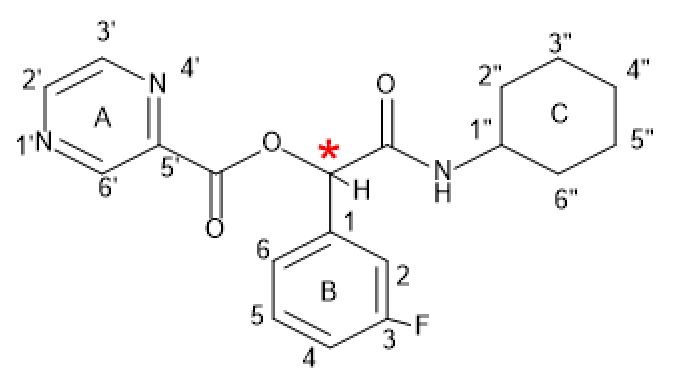


**P12**

Yield: 54%, mp: 143-145°C, white solid. IR (KBr disk): (3265.97 (NH amid group)), (3100.43 (CH aromatic)), (2930.03-2854.01 (CH aliphatic)), (1718.87 (C=O ester)), (1656.95 (C=O amid)), (1569.89-1510.03 (C=C aromatic)), (1187.89 (C-O)), (C-F (967.65)) cm-1. 1H NMR (499 MHz, DMSO-d6) δ (9.32 (s, 1H)H6’), (9.18 (s, 3H) ) HRing (A,B) overlapping multiple), (9.04 – 8.70 (m, 3H) H2’,3’,5), (8.30 (dd, *J* = 19.1, 7.9 Hz, 1H) NH), (7.46 (dq, *J* = 21.6, 11.4, 9.4 Hz, 2H) H6,4), 7.23 (t, *J* = 7.6 Hz, 1H) H2), (6.14 (s, 1H) CH*), (1.87 – 1.41 (m, 5H) H1”,2”,6”), (1.42 – 0.90 (m, 3H) H5”,3”). 13C NMR (126 MHz, dmso) δ 166.43, 163.10, 161.44, 148.89, 148.13, 146.35, 146.02, 145.45, 145.07, 143.00, 138.62, 138.56, 131.08, 131.01, 123.75, 116.08, 115.92, 114.61, 114.43, 75.94, 48.27, 40.48, 40.31, 40.15, 39.98, 39.81, 39.65, 39.48, 32.62, 32.43, 25.55, 24.87, 24.78.


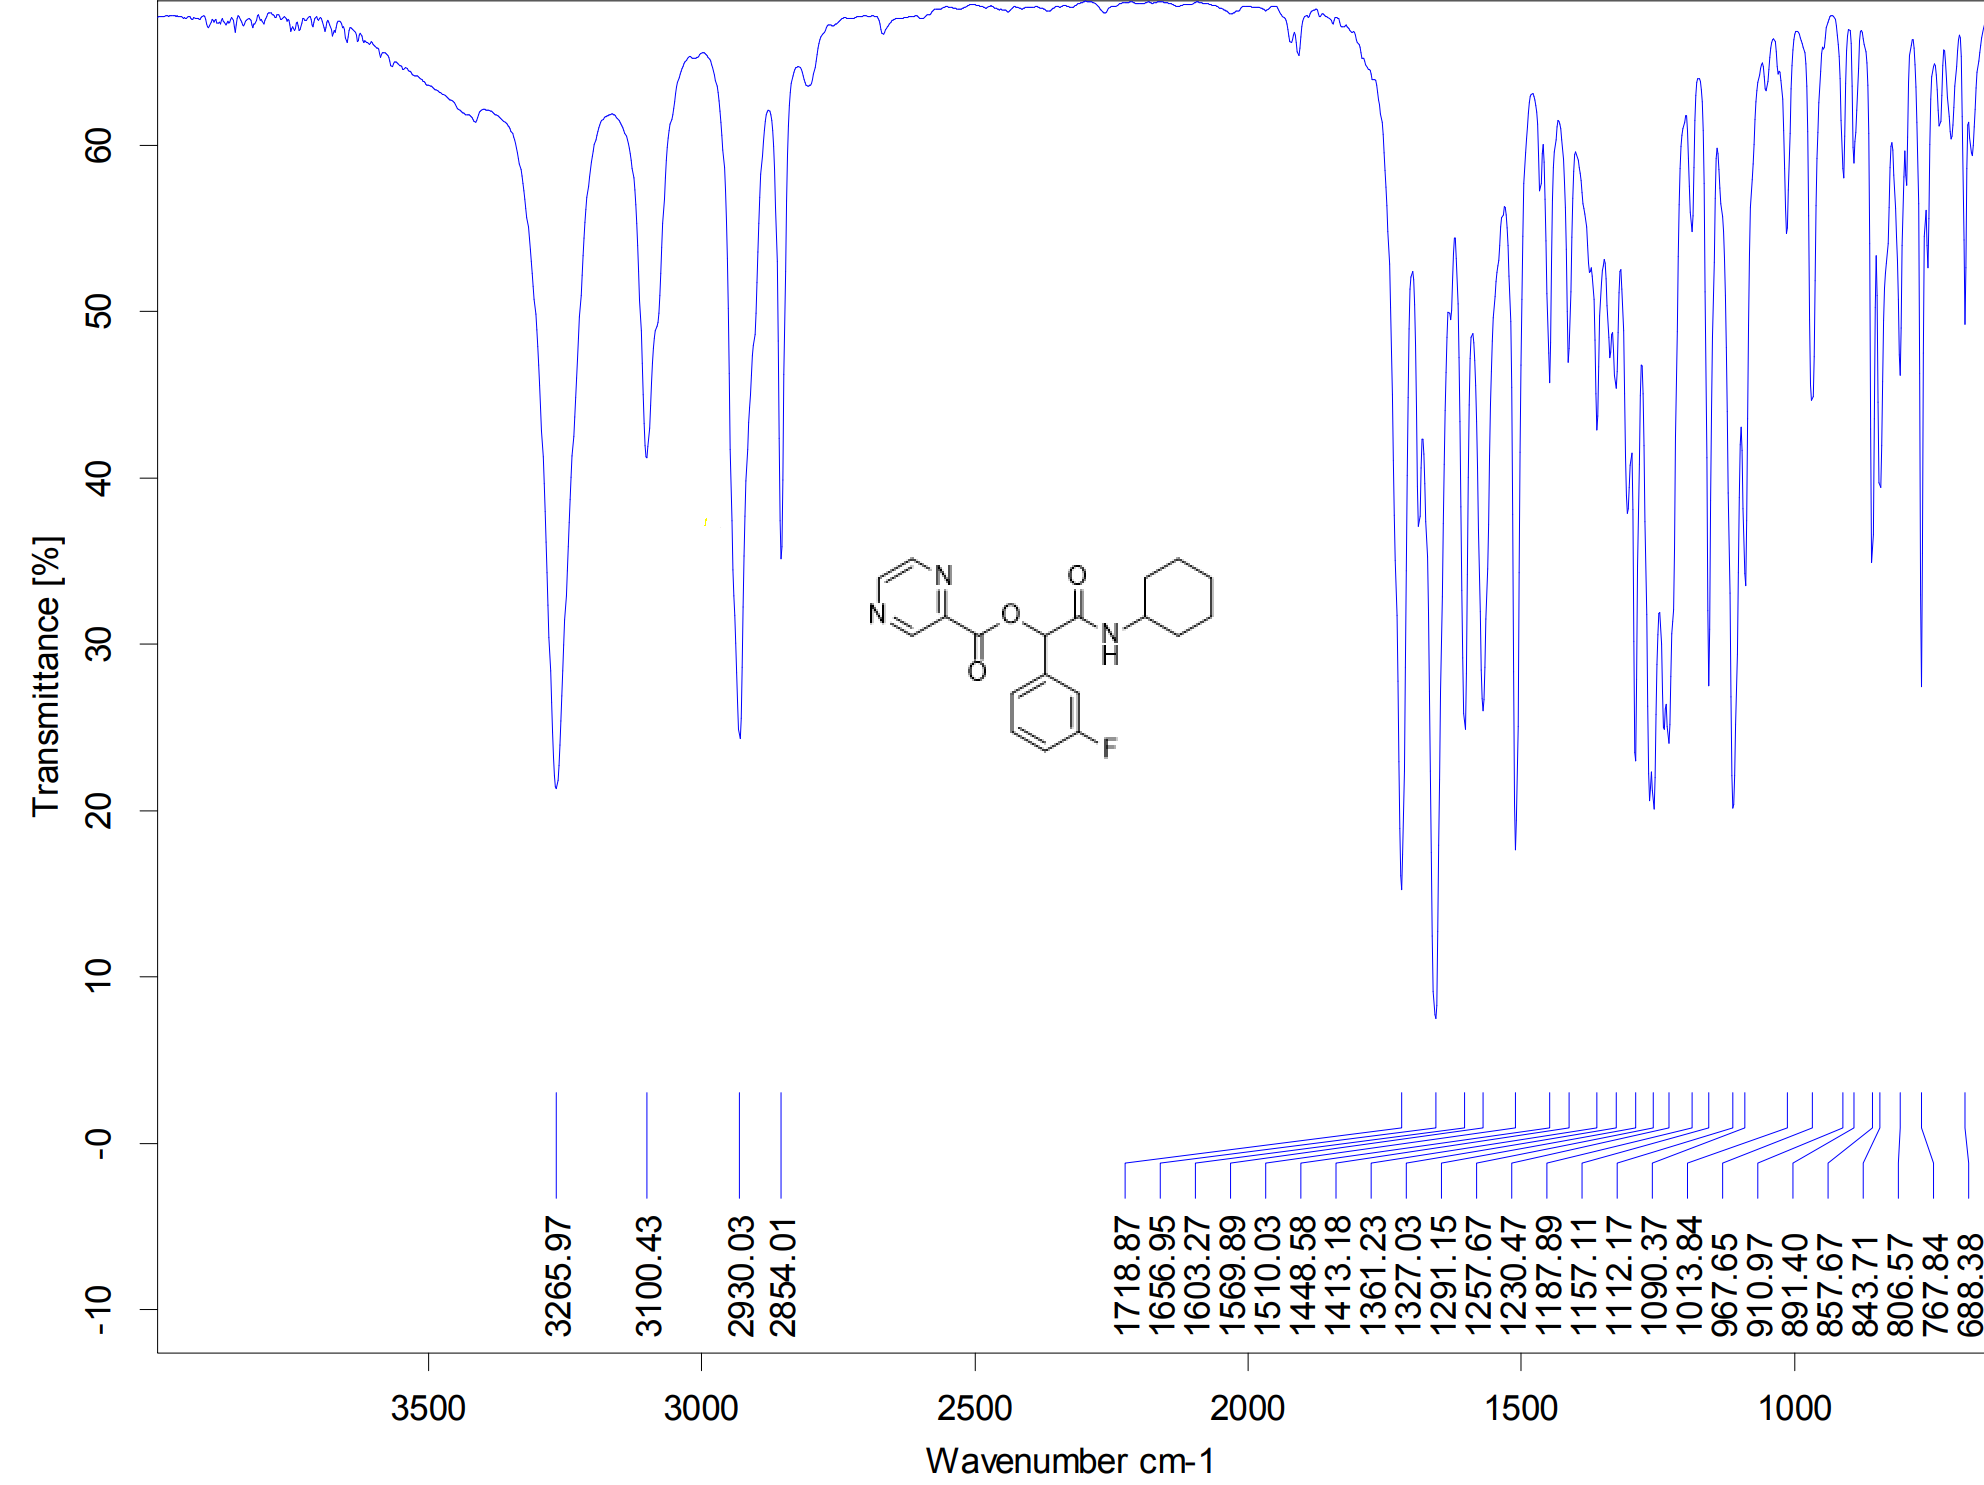


**Figure S39**. IR spectrum of **P12**


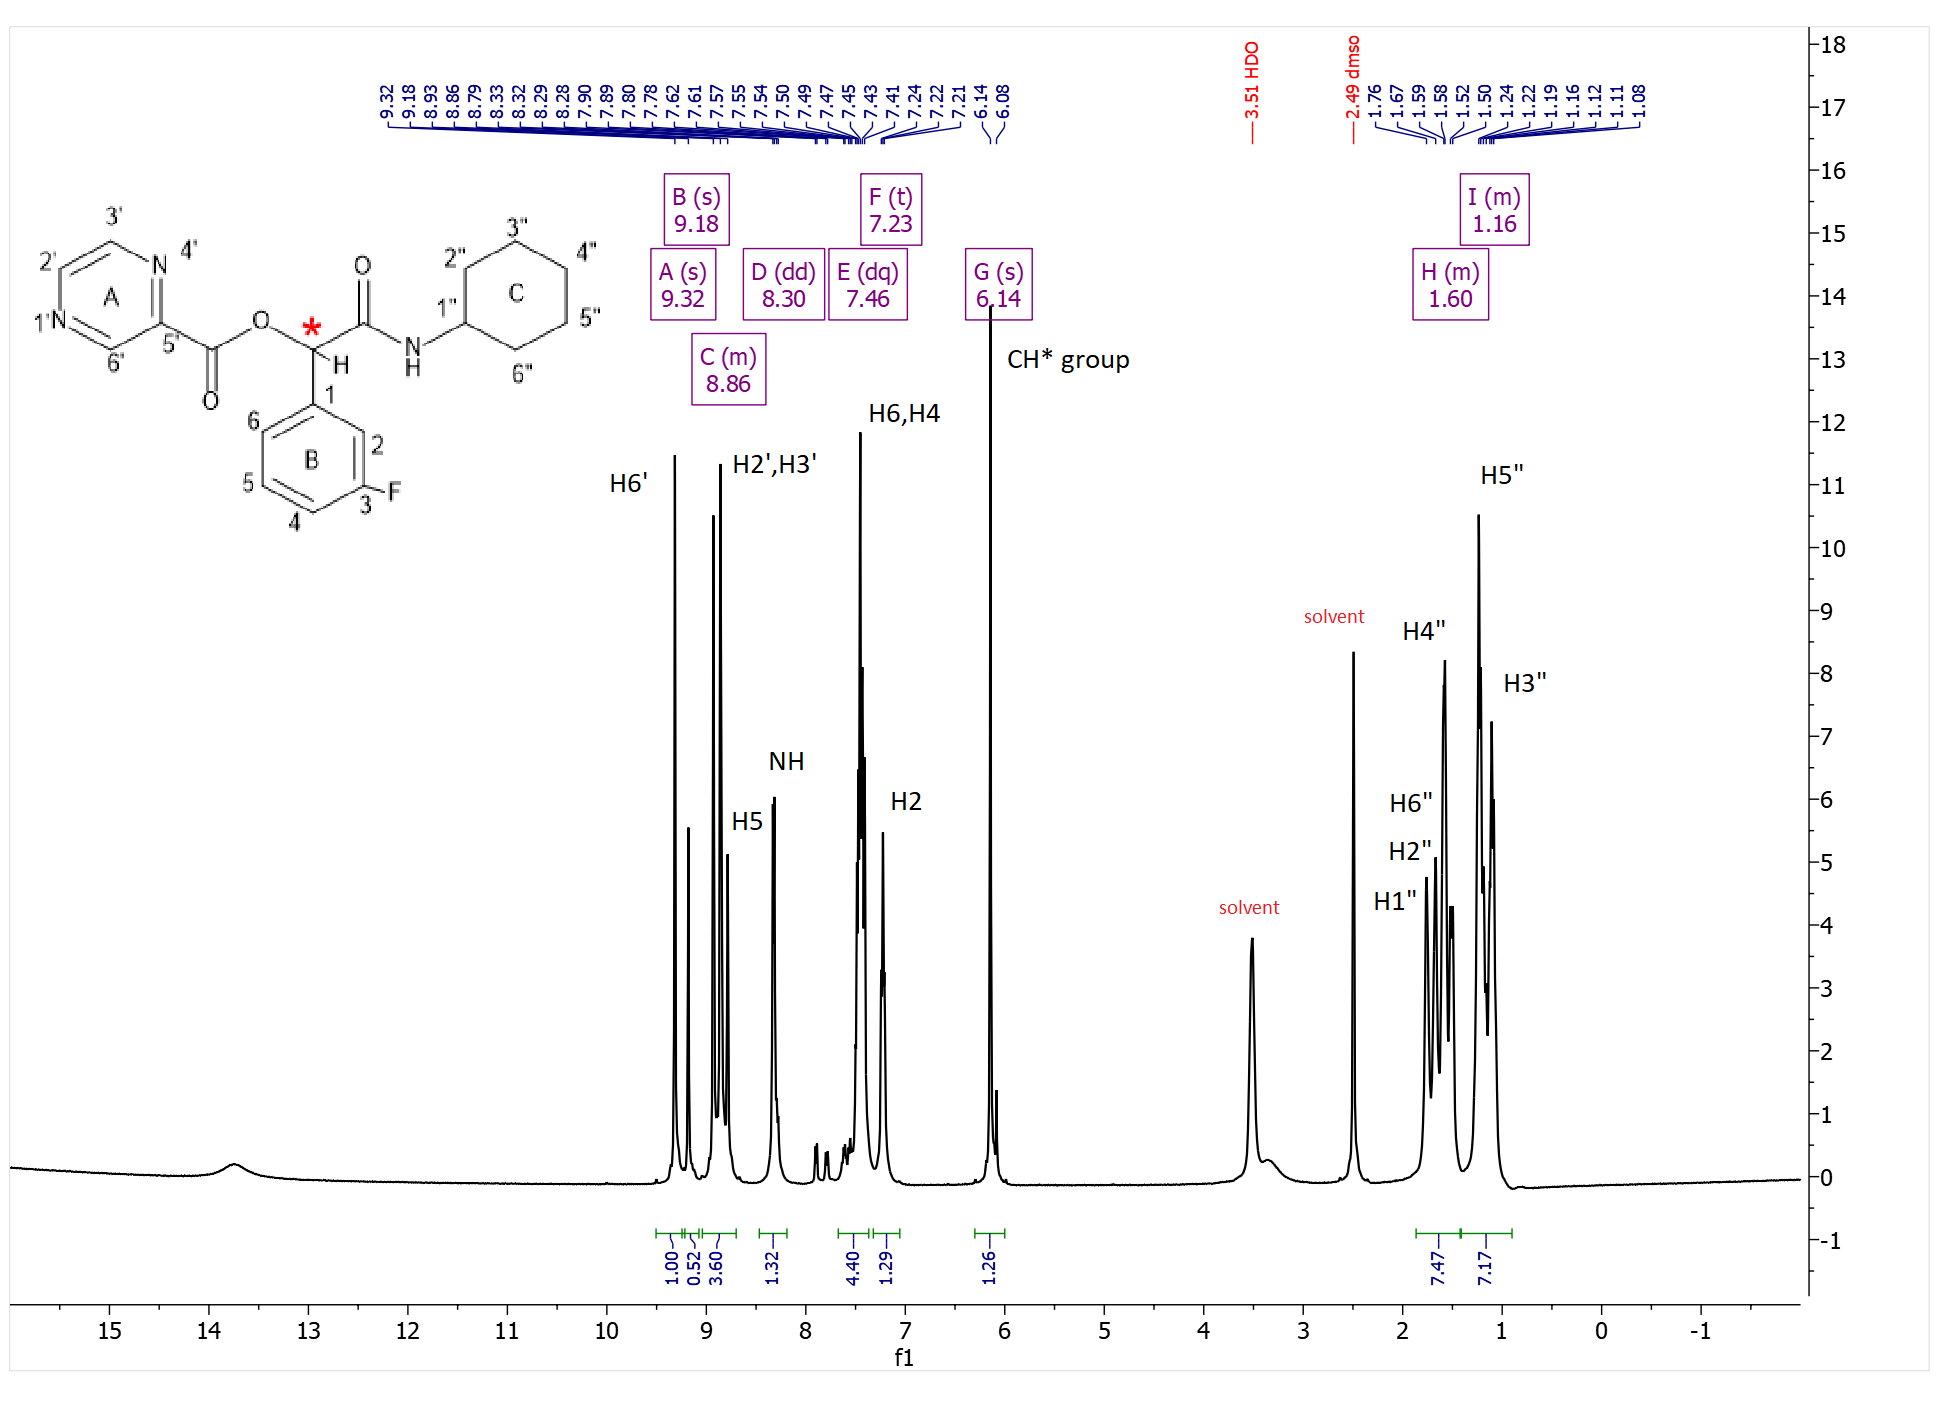


**Figurer S40**. 1H-NMR spectrum of **P12**


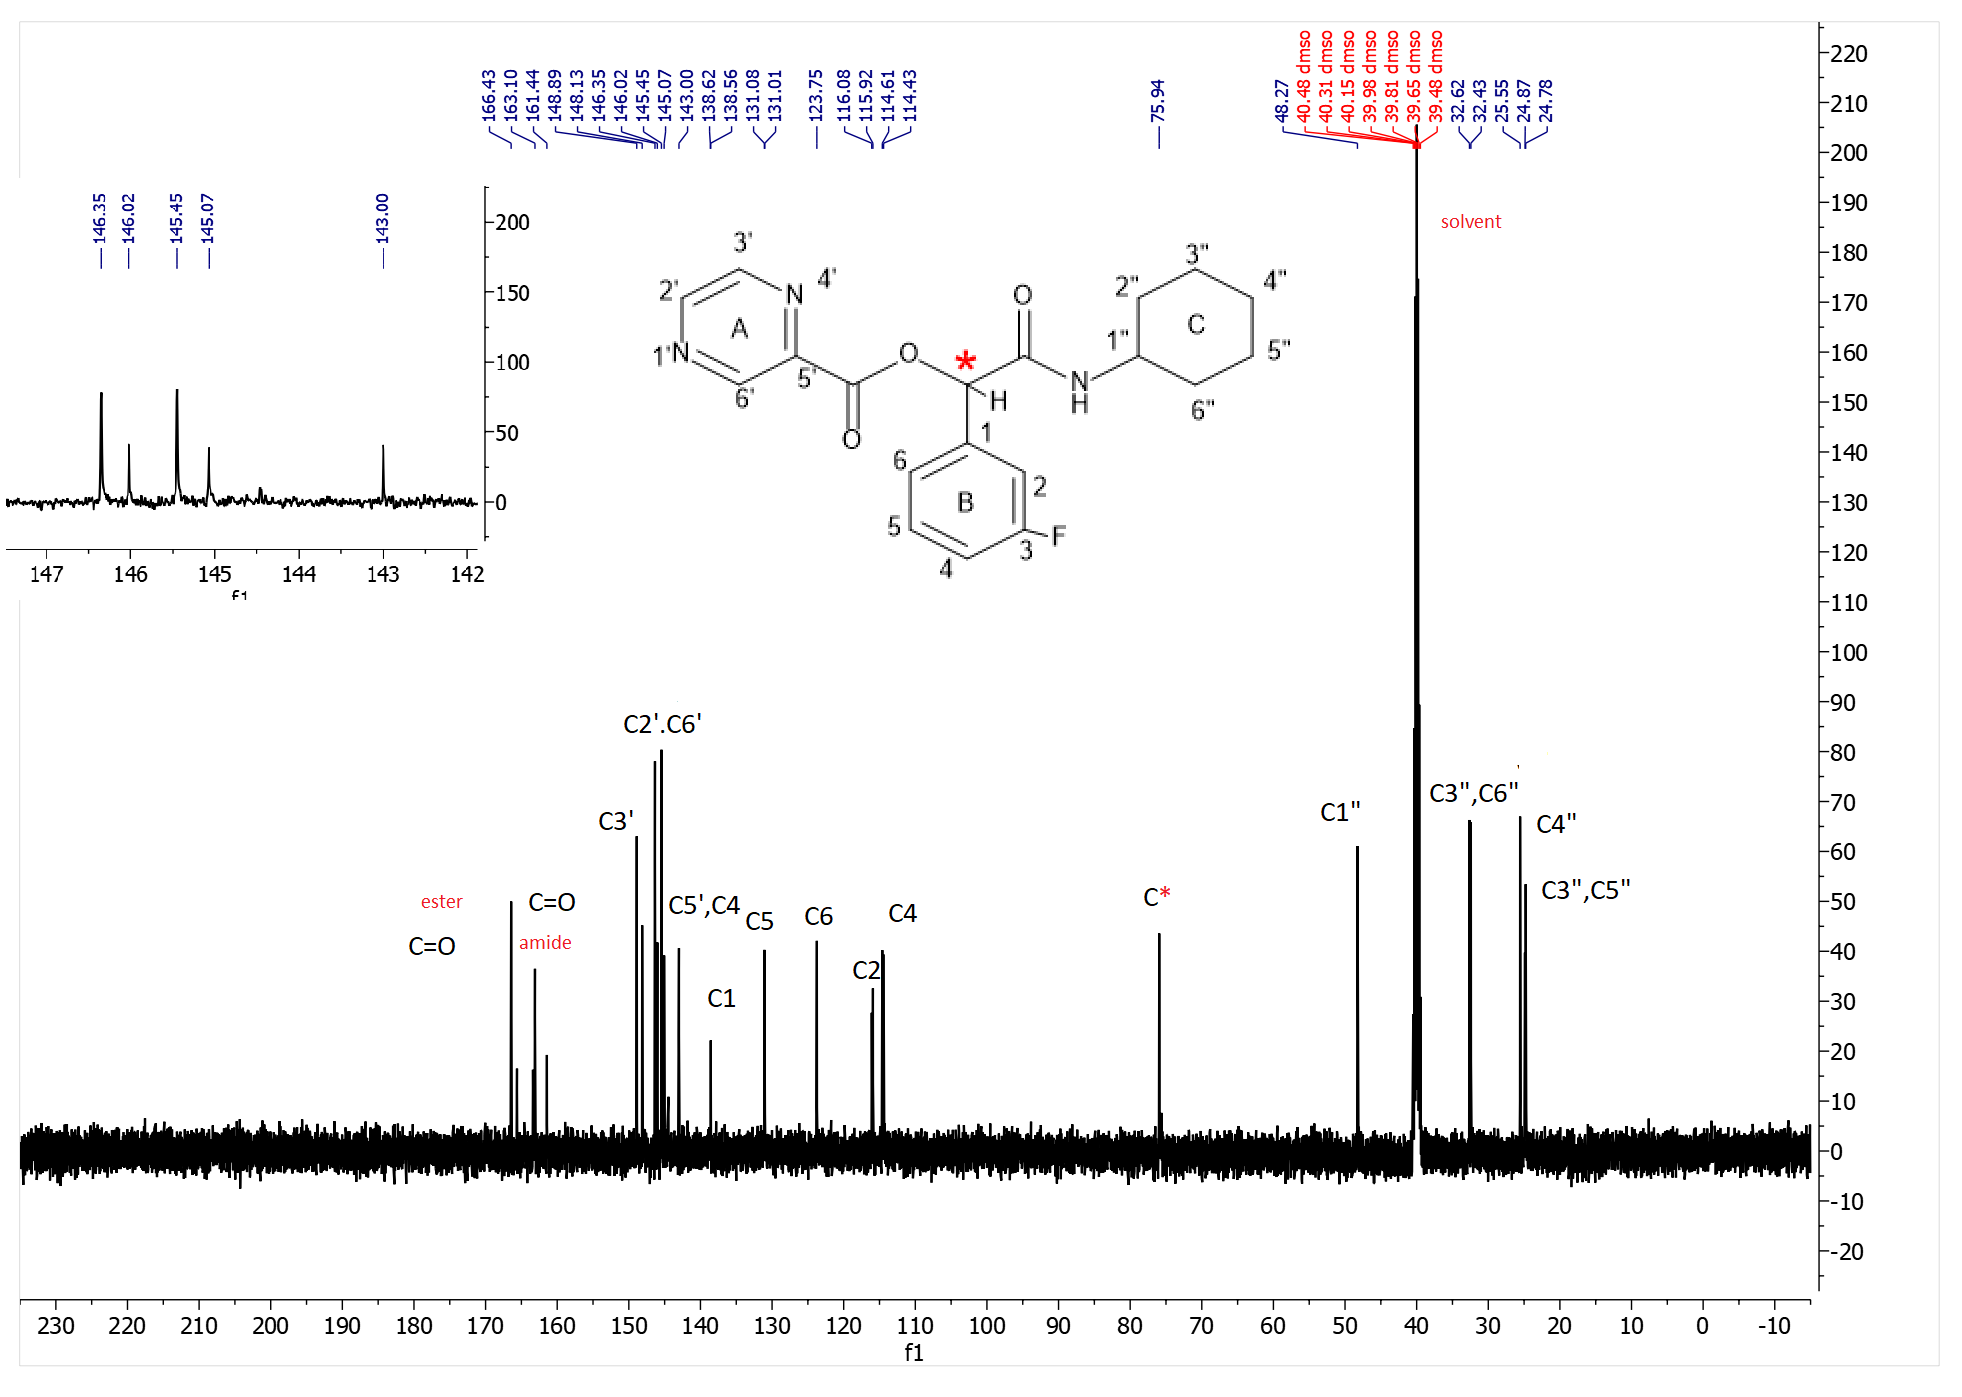


**Figure S41**. 13C-NMR spectrum of **P12**

**2-(cyclohexylamino)-1-(4-fluorophenyl)-2-oxoethyl pyrazine-2-carboxylate(P13)**


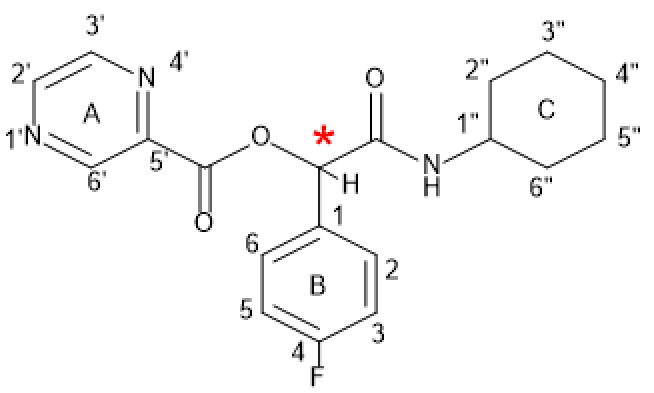


**P13**

Yield: 56%, mp: 180-182°C, white solid. IR (KBr disk): (3265.97 (NH amid group)), (3100.43 (CH aromatic)), (2930.03-2854.01 (CH aliphatic)), (1718.87 (C=O ester)), (1656.95 (C=O amid)), (1569.89-1510.03 (C=C aromatic)), (1187.89 (C-O)), (C-F (967.65)) cm-1. 1H NMR (300 MHz, DMSO-d6) δ (9.29 (s, 1H) H6’, (9.03 – 8.71 (m, 2H) H2’,3’), (8.39 – 8.21 (m, 2H) H2), (8.09 (dd, *J* = 8.4, 5.7 Hz, 1H) NH), (7.64 (dd, *J* = 7.6, 4.7 Hz, 2H)H6), (7.47 – 7.12 (m, 3H) H3,5) overlapping multiple), (6.09 (d, *J* = 22.8 Hz, 1H) CH*), 3.50 (s, 1H) H1”) , (2.15 – 1.38 (m, 4H) H2”,4”,6”), (1.12 (dd, *J* = 30.1, 19.4 Hz, 3H) H3”,5”). 13C NMR (75 MHz, DMSO) δ 166.67, 166.34, 163.99, 163.88, 162.73, 160.63, 148.41, 145.85, 144.97, 142.61, 132.26, 131.85, 131.81, 129.59, 125.79, 116.10, 115.80, 115.53, 115.24, 75.57, 74.95, 47.75, 40.33, 40.06, 39.78, 39.50, 39.22, 38.94, 38.67, 32.20, 32.00, 25.10, 24.43.


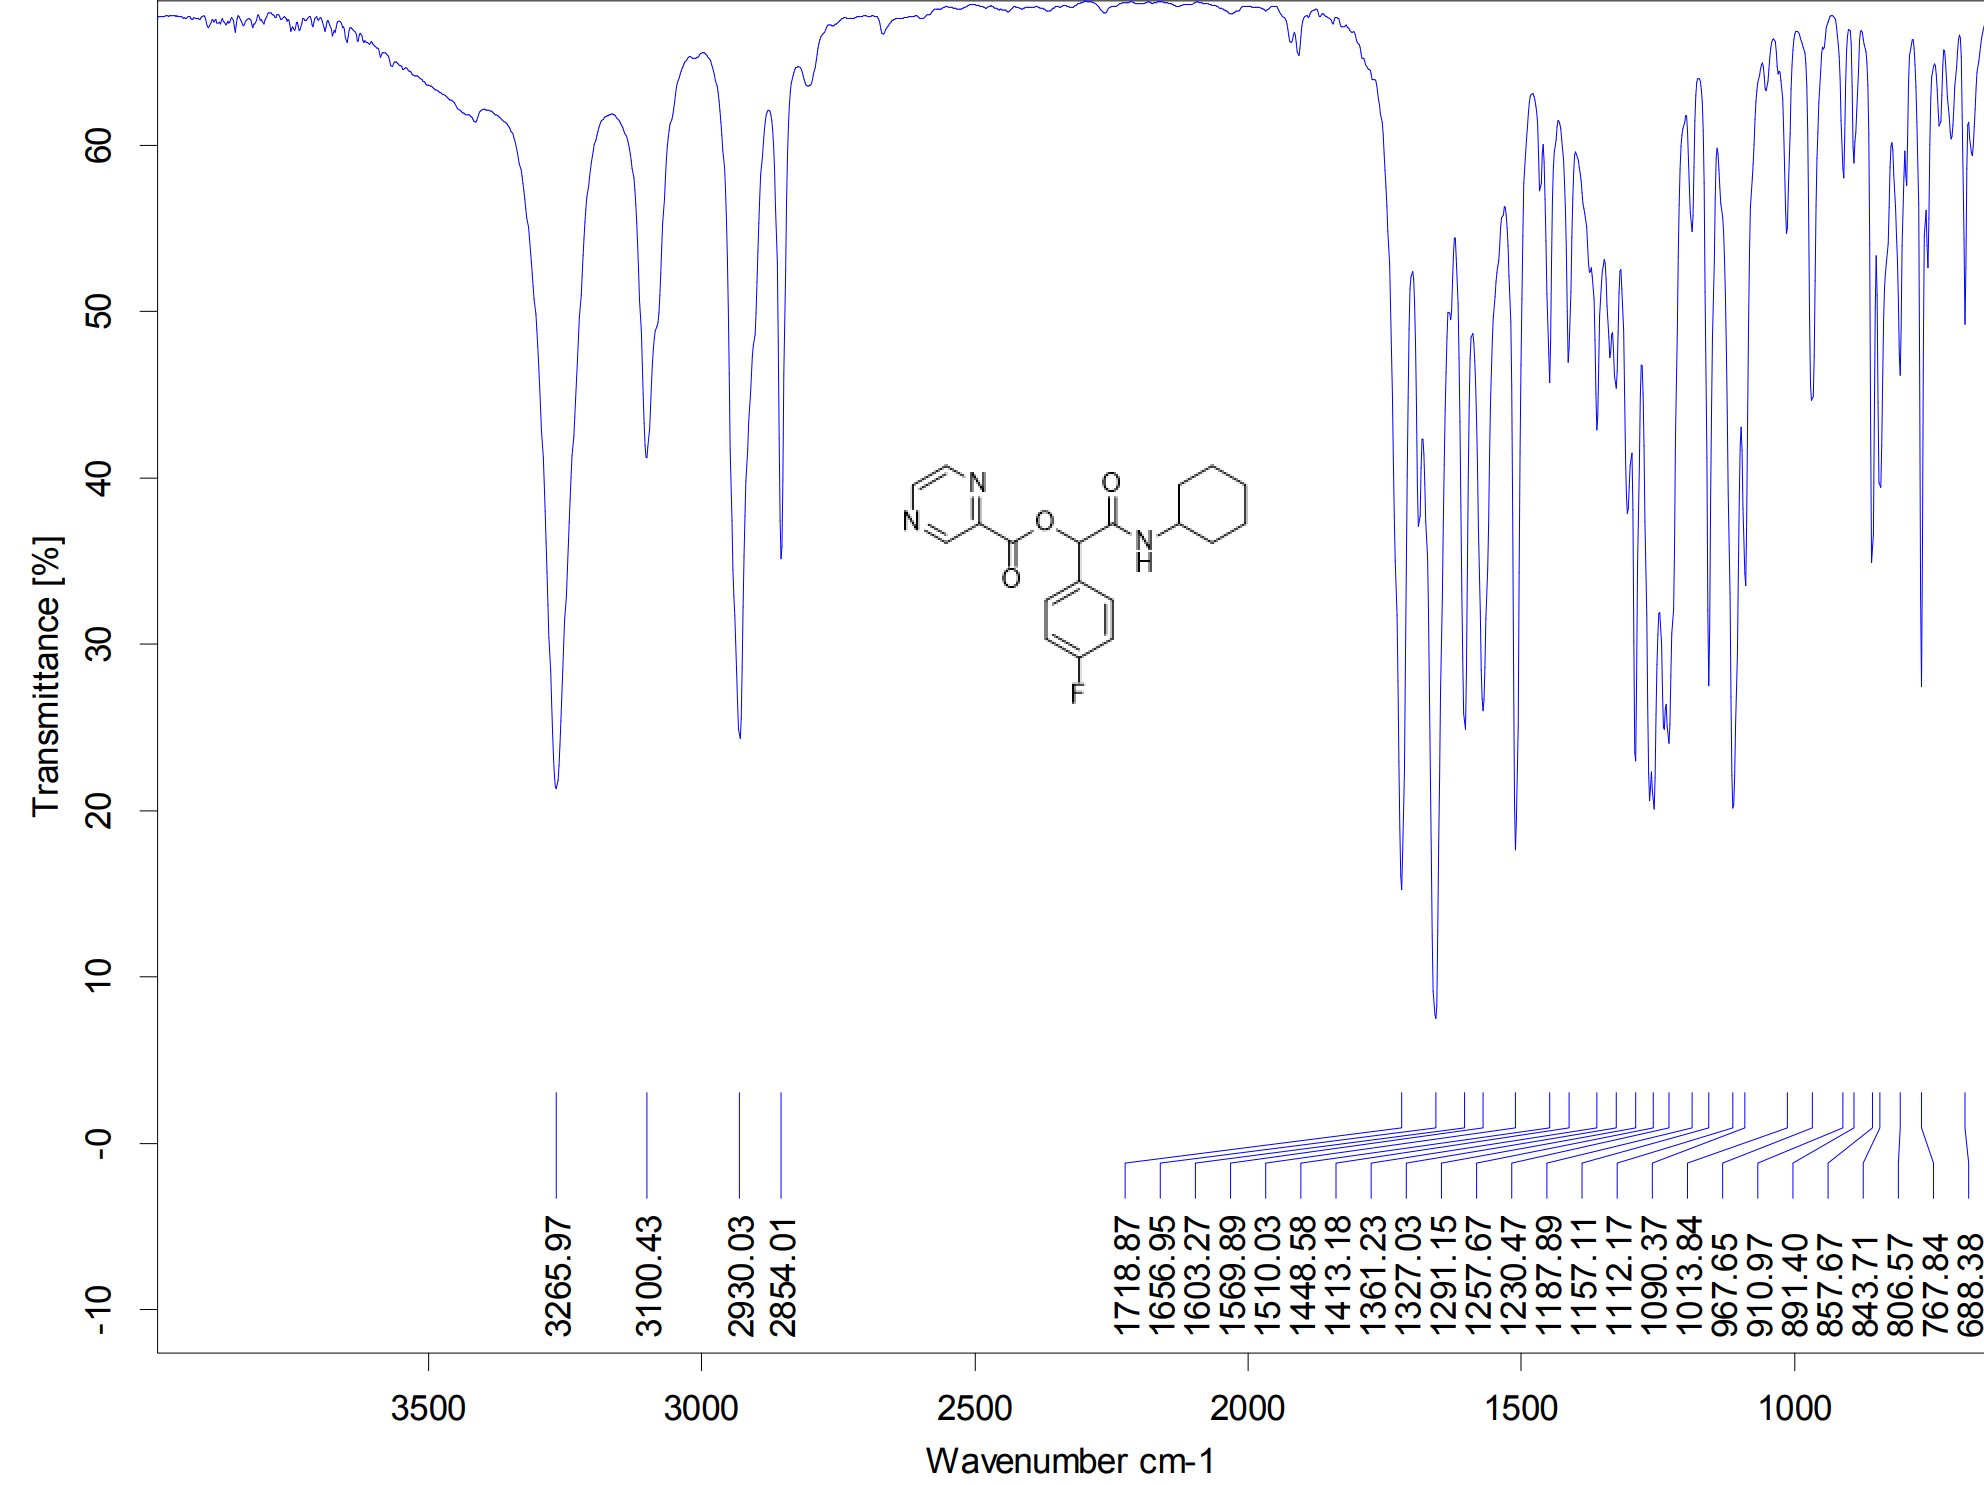


**Figure S42**. IR spectrum of **P13**


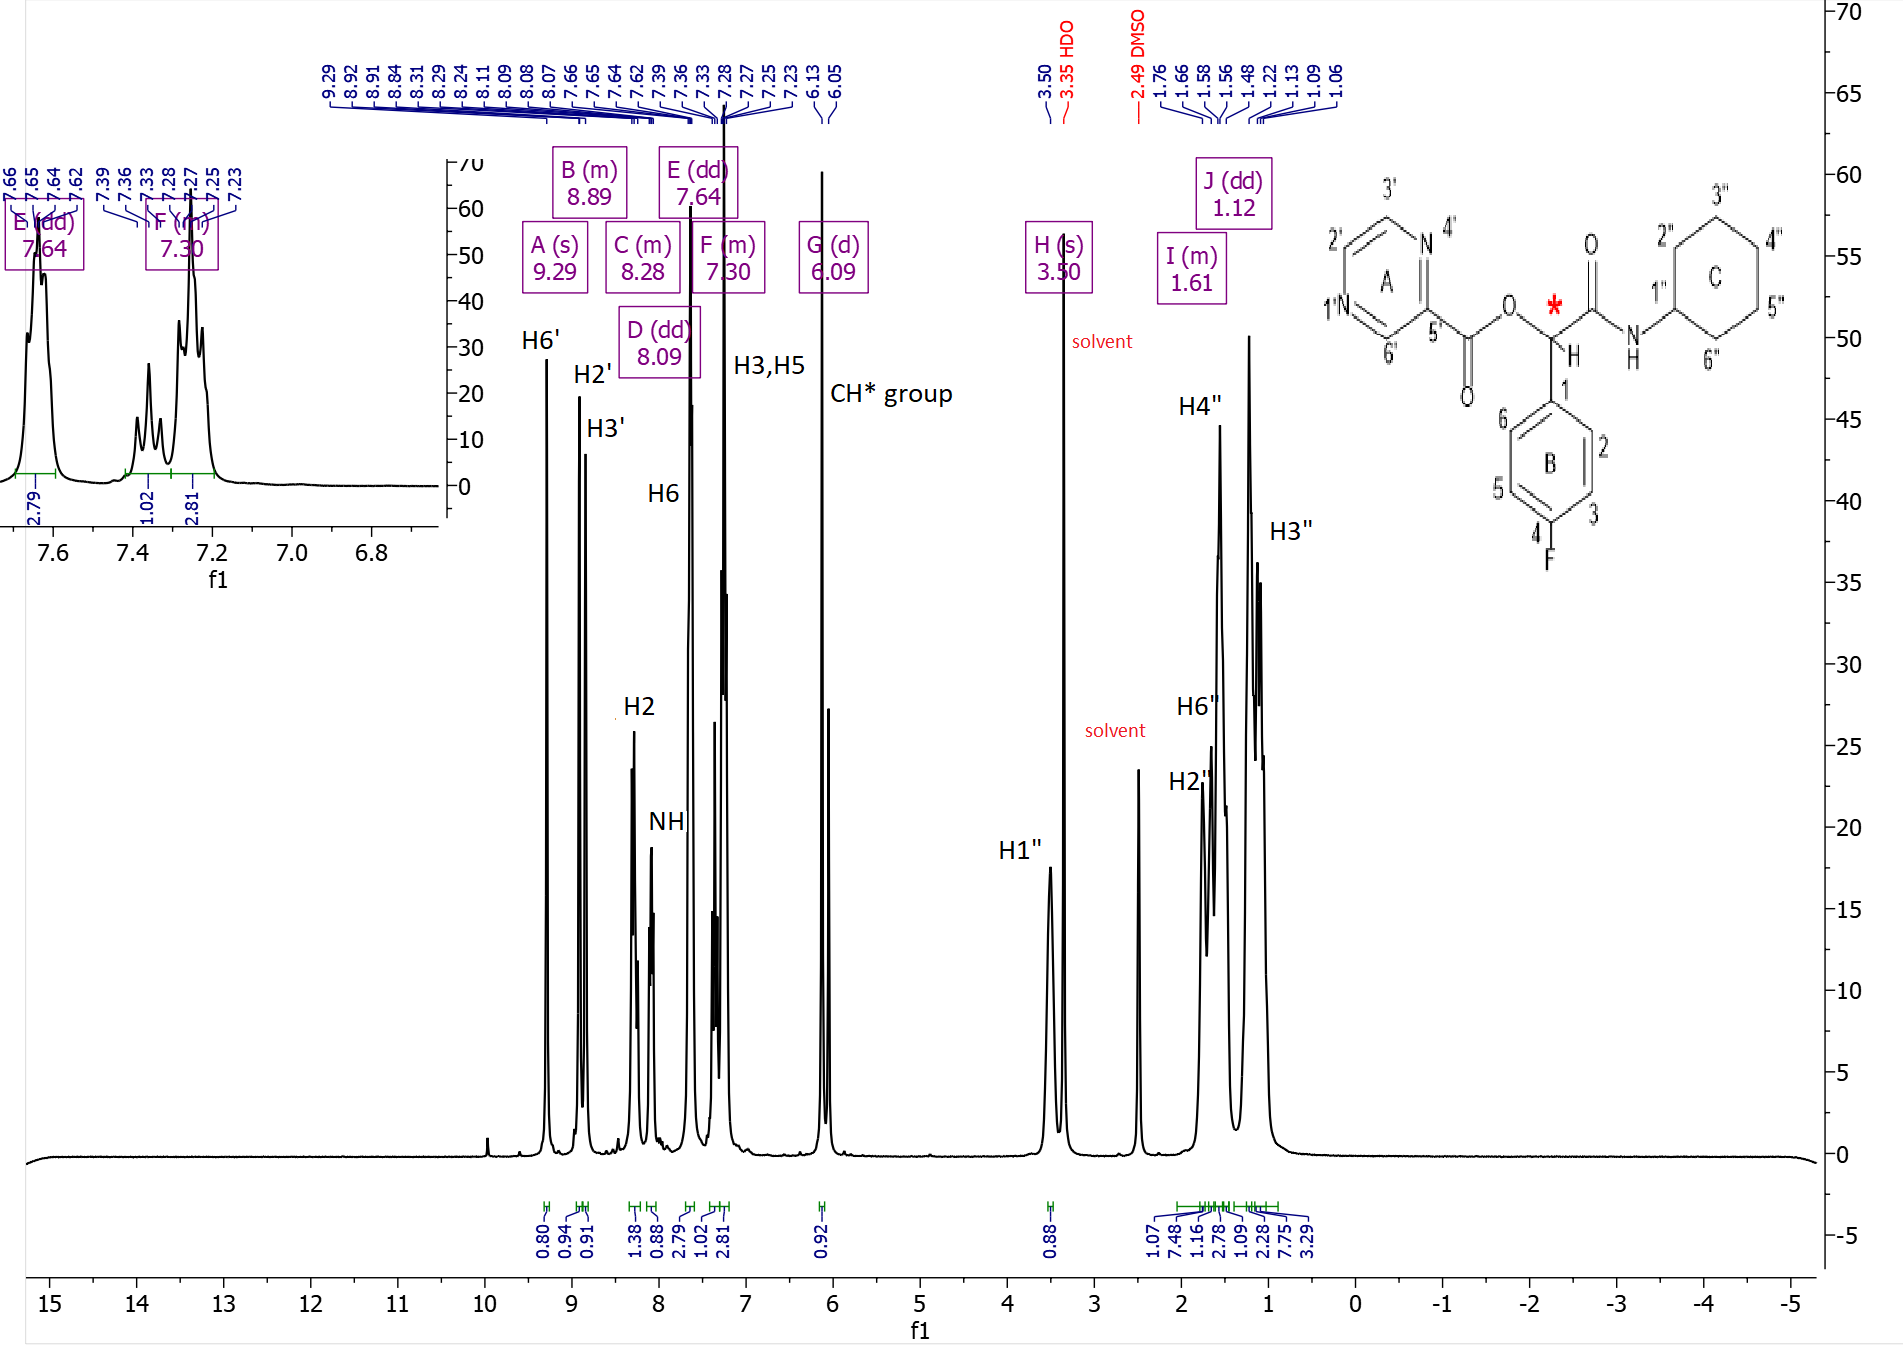


**Figure S43**. 1H-NMR spectrum of **P13**


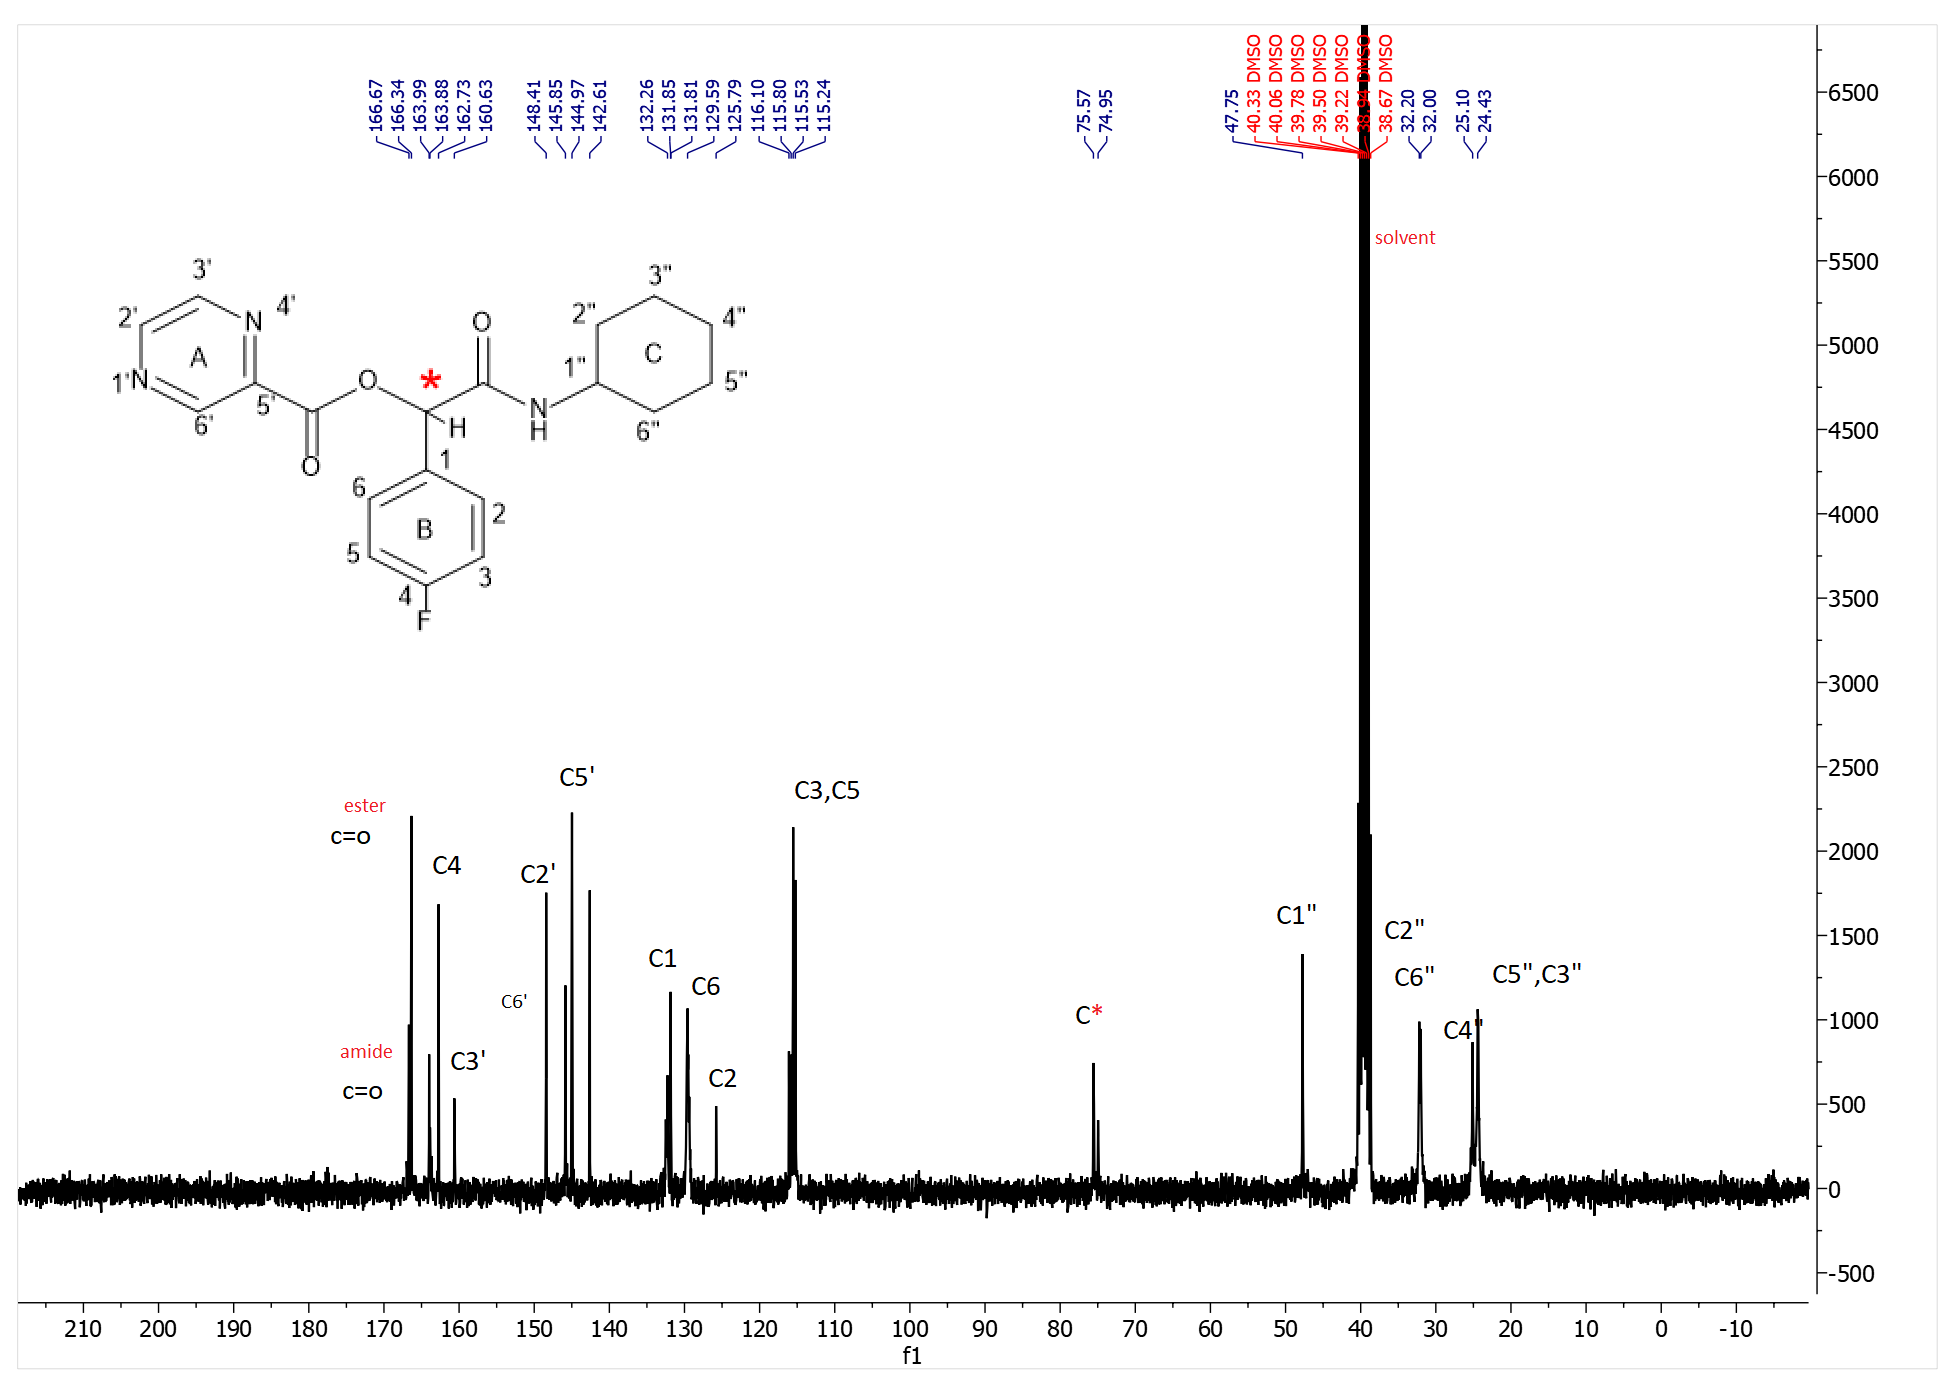


**Figure S44**. 13C-NMR spectrum of **P13**

**1-(2-chlorophenyl)-2-(cyclohexylamino)-2-oxoethyl pyrazine-2-carboxylate(P14)**


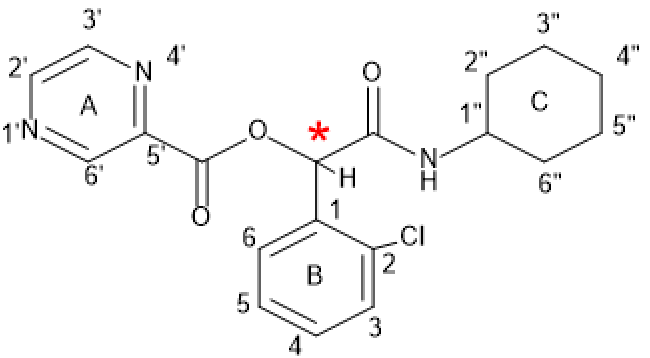


**P14**

Yield: 48%, mp: 138-139°C, white solid. IR (KBr disk): (3308.64 (NH amid group)), (3061.78-3029.67 (CH aromatic)), (2938.15-2850.61(CH aliphatic)), (1738.85(C=O ester)), (1649.84(C=O amid)), (1536.92-1449.65 (C=C aromatic)), (1133.88 (C-O)), (755.87 (C-Cl)) cm-1. 1H NMR (499 MHz, DMSO-d6) δ (8.33 (d, *J* = 7.7 Hz, 1H) H6’), (7.86 (d, *J* = 8.0 Hz, 2H)H3’,2’), (7.71 – 7.23 (m, 6H) H3,4,5,6,NH overlapping multiple), (6.40 (s, 1H) CH*), (5.24 (s, 1H)H1”), (1.66 (ddd, *J* = 74.7, 41.4, 13.2 Hz, 6H)H2”,4”,6”), (1.20 (dq, *J* = 54.4, 14.5, 12.0 Hz, 3H).H5”,3”). 13C NMR (126 MHz, dmso) δ 165.77, 164.27, 134.21, 134.13, 133.69, 131.93, 131.43, 131.22, 130.14, 130.03, 129.45, 128.01, 127.93, 73.40, 48.47, 40.49, 40.32, 40.15, 39.99, 39.82, 39.65, 39.49, 32.51, 25.58, 24.91.


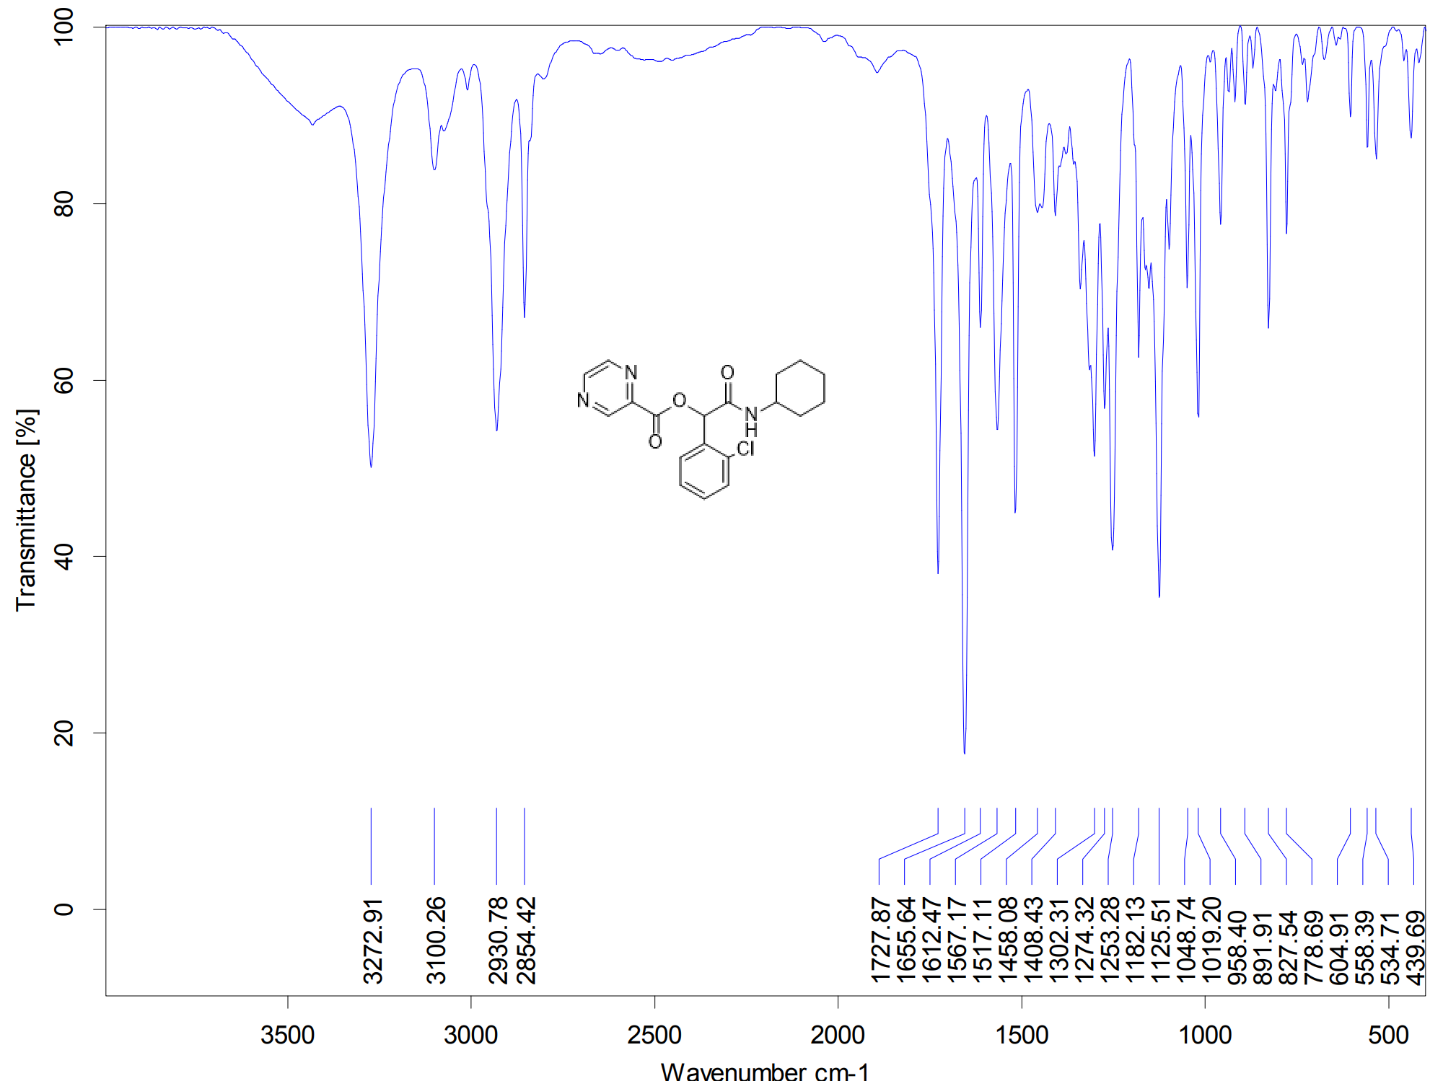


**Figure S45**. IR spectrum of **P14**


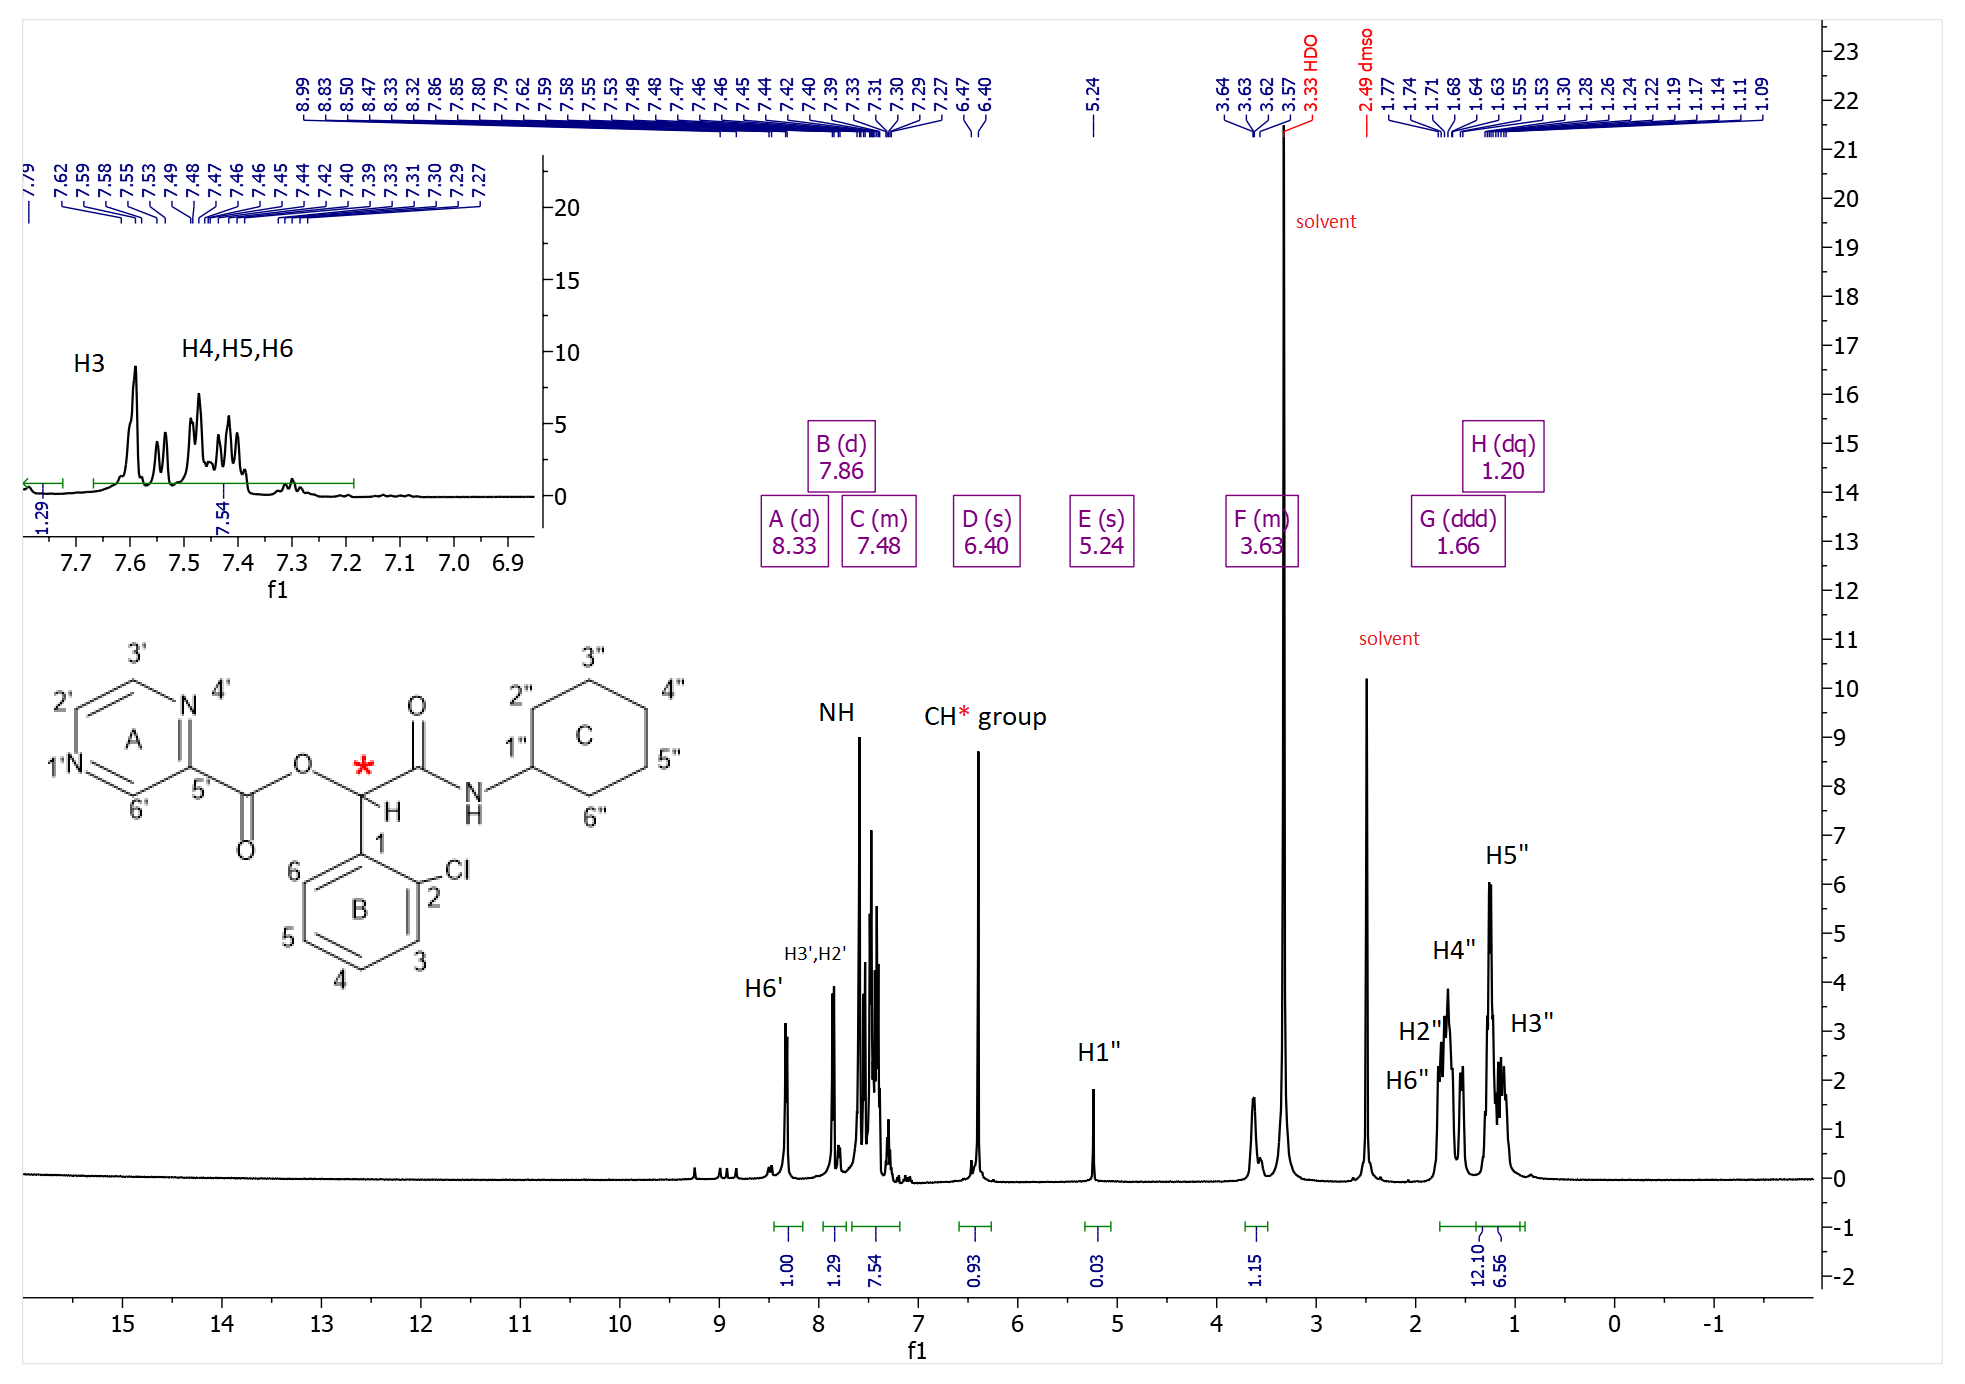


**Figure S46**. 1H-NMR spectrum of **P14**


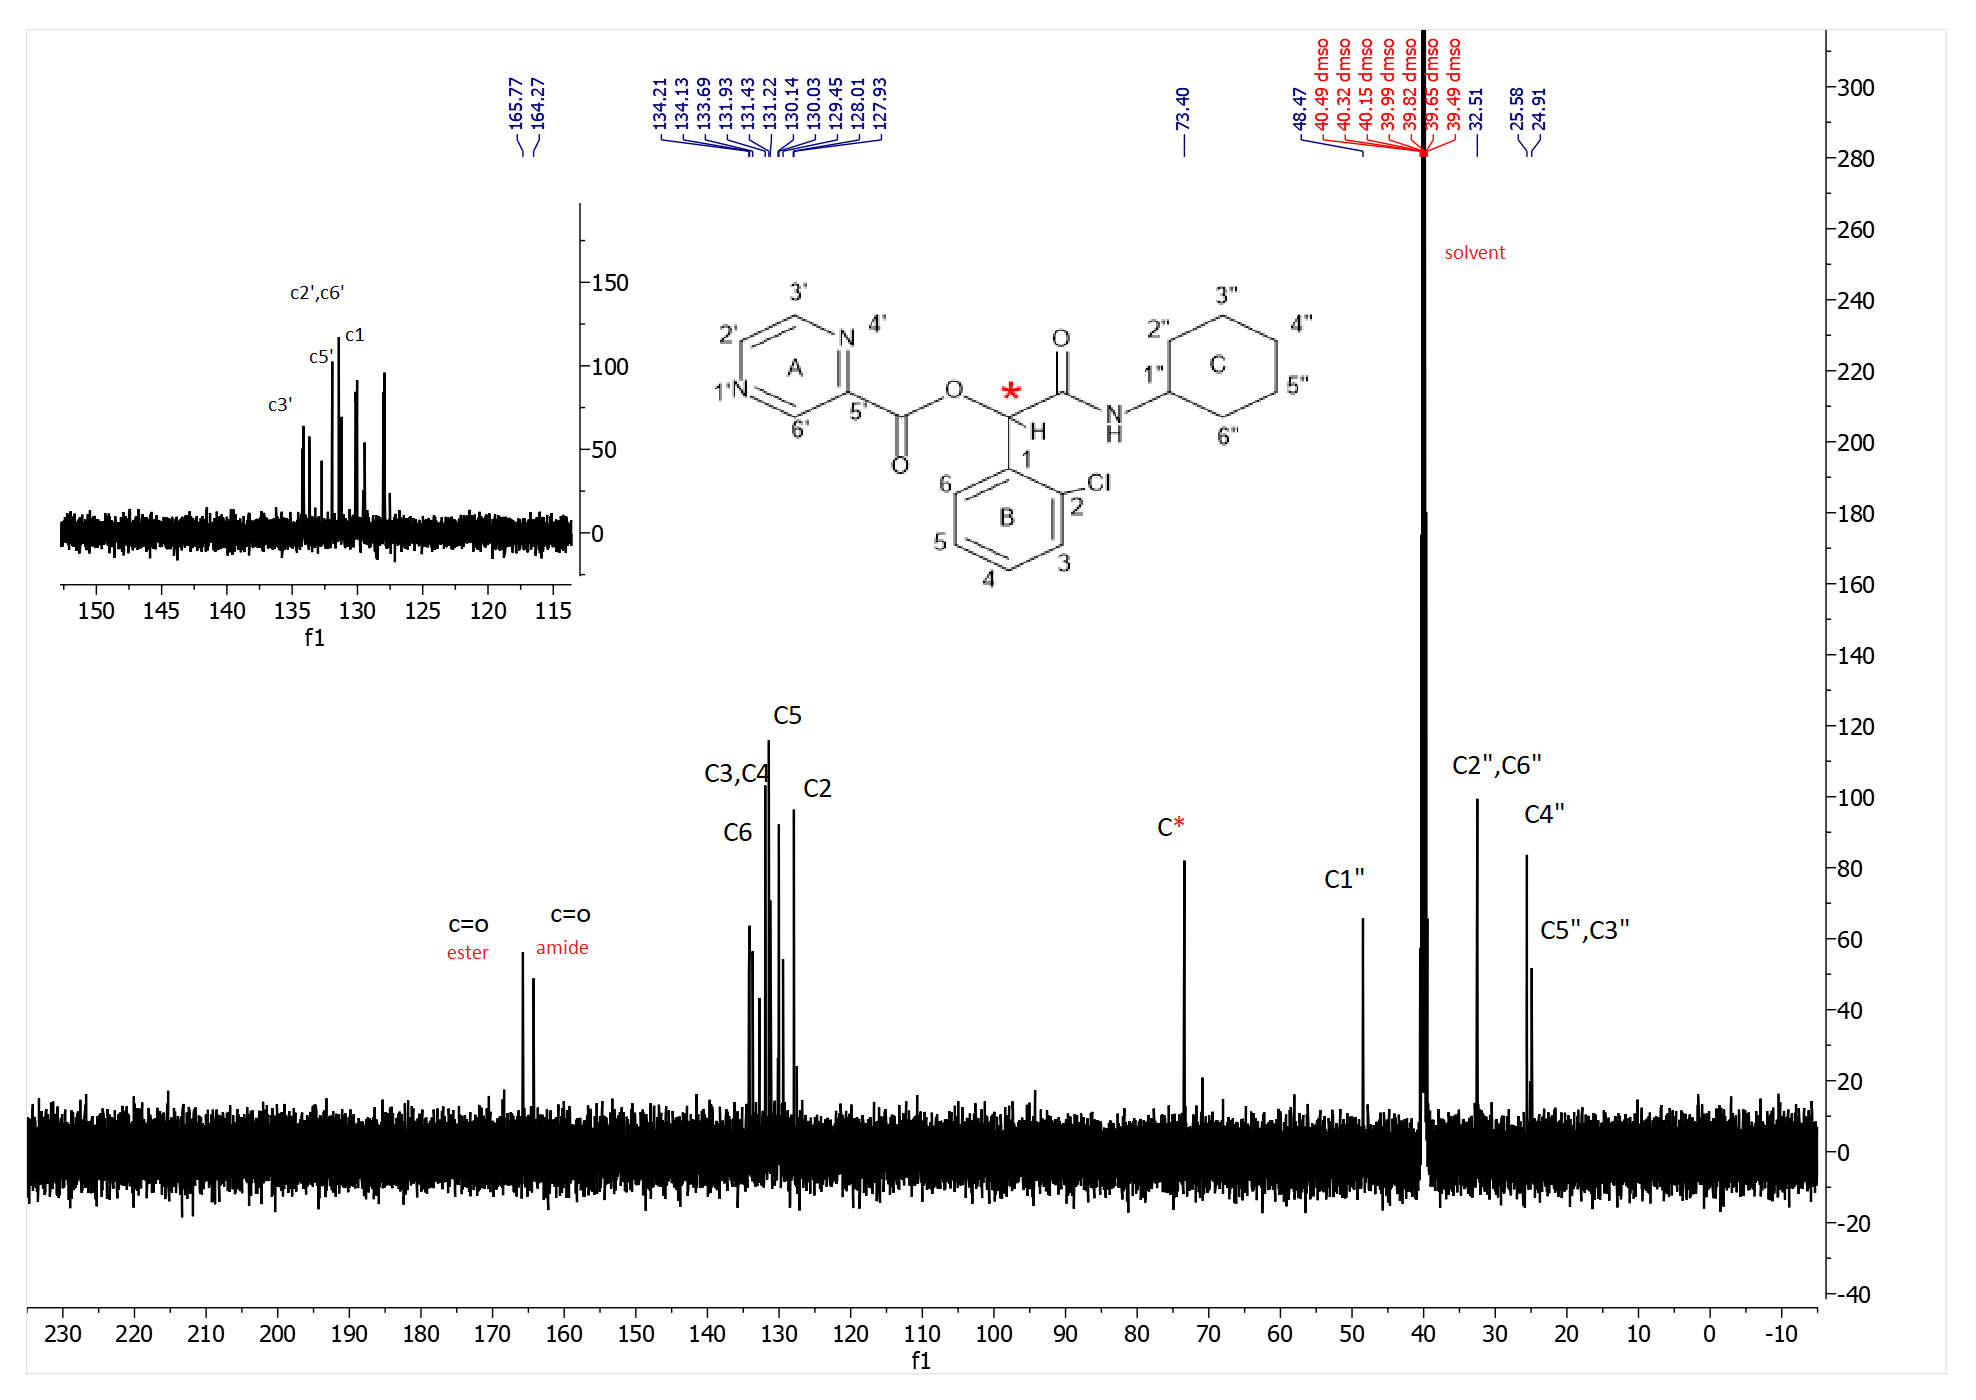


**Figure S47**. 13C-NMR spectrum of **P14**

**1-(3-chlorophenyl)-2-(cyclohexylamino)-2-oxoethyl pyrazine-2-carboxylate(P15)**


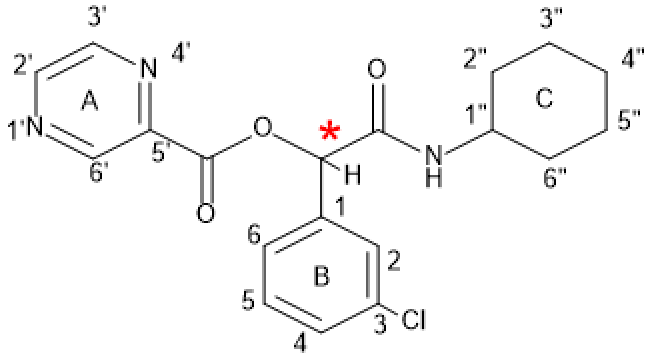


**P15**

Yield: 49%, mp: 139-141°C, white solid. IR (KBr disk): (3308.64 (NH amid group)), (3061.78-3029.67 (CH aromatic)), (2938.15-2850.61(CH aliphatic)), (1738.85(C=O ester)), (1649.84(C=O amid)), (1536.92-1449.65 (C=C aromatic)), (1133.88 (C-O)), (755.87 (C-Cl)) cm-1. 1H NMR (300 MHz, DMSO-*d*6) δ (9.31 (d, *J* = 1.3 Hz, 1H) H6’), (9.04 – 8.77 (m, 2H) H3’.2’), (8.36 (d, *J* = 7.8 Hz, 1H)NH), (7.78 – 7.32 (m, 4H) H2,4,5,6 overlapping multiple), (6.13 (s, 1H) CH*, (3.66 – 3.44 (m, 1H) H1”), (1.84 – 1.35 (m, 6H) H2”,4”,6”), (1.15 (ddd, *J* = 43.8, 19.5, 9.6 Hz, 4H) H5”,3”). 13C NMR (75 MHz, DMSO) δ 165.96, 162.66, 148.47, 145.89, 144.99, 142.51, 137.83, 133.05, 130.49, 128.69, 127.15, 127.04, 125.92, 75.46, 47.81, 40.33, 40.06, 39.78, 39.50, 39.22, 38.94, 38.67, 32.16, 25.10, 24.41.


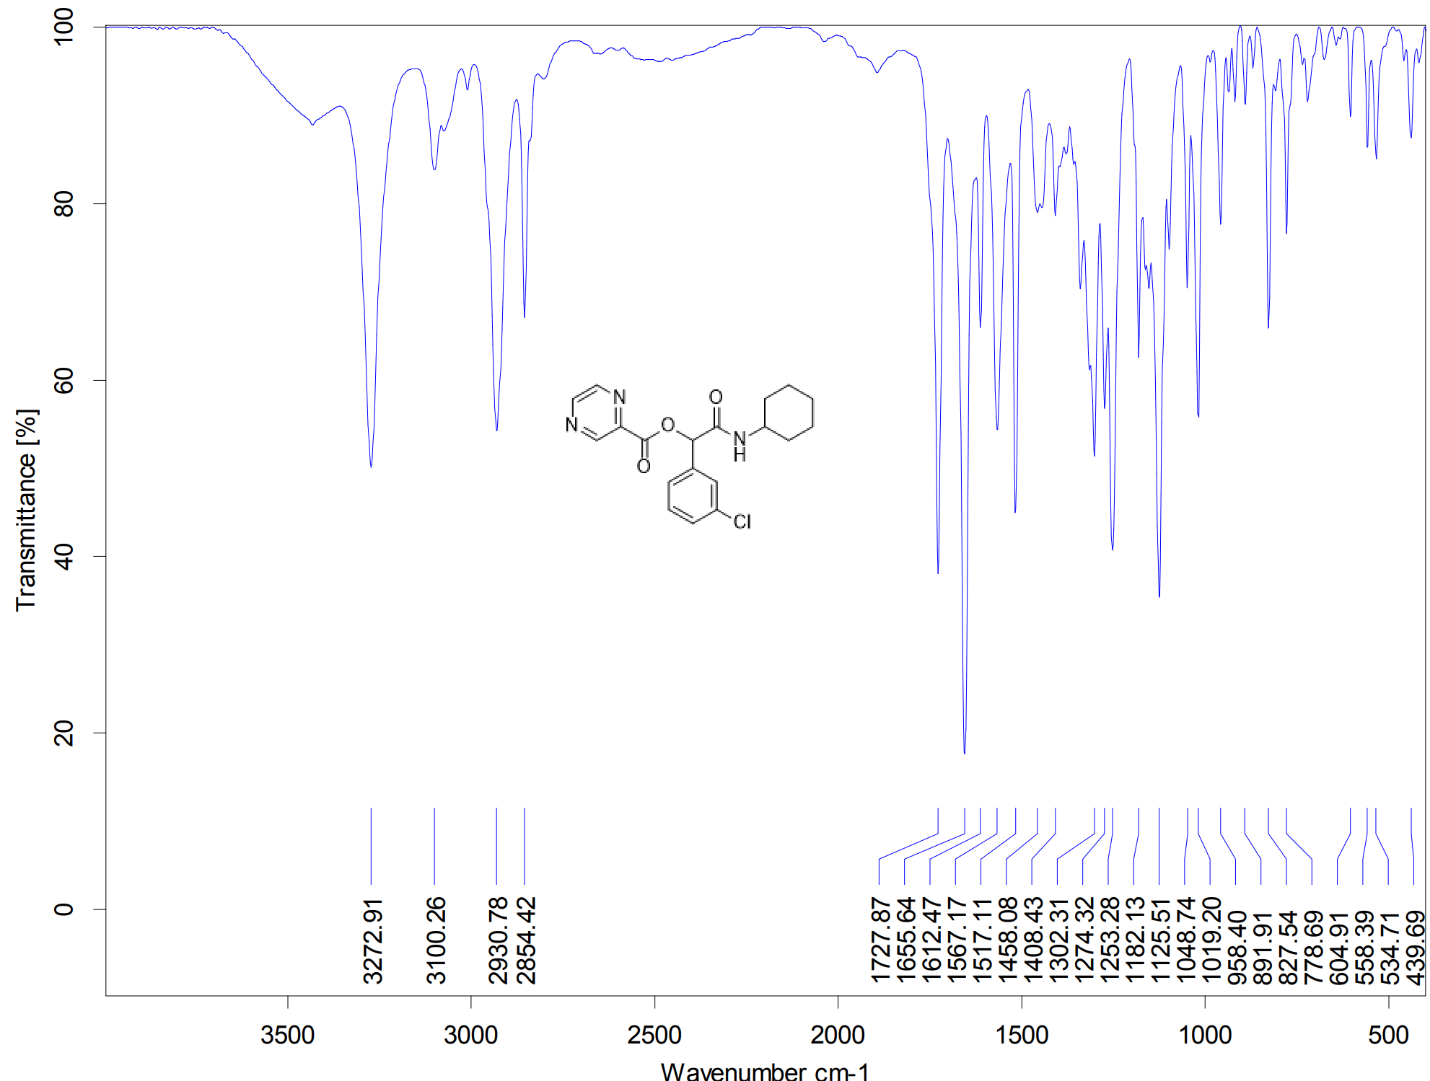


**Figure S48**. IR spectrum of **P15**


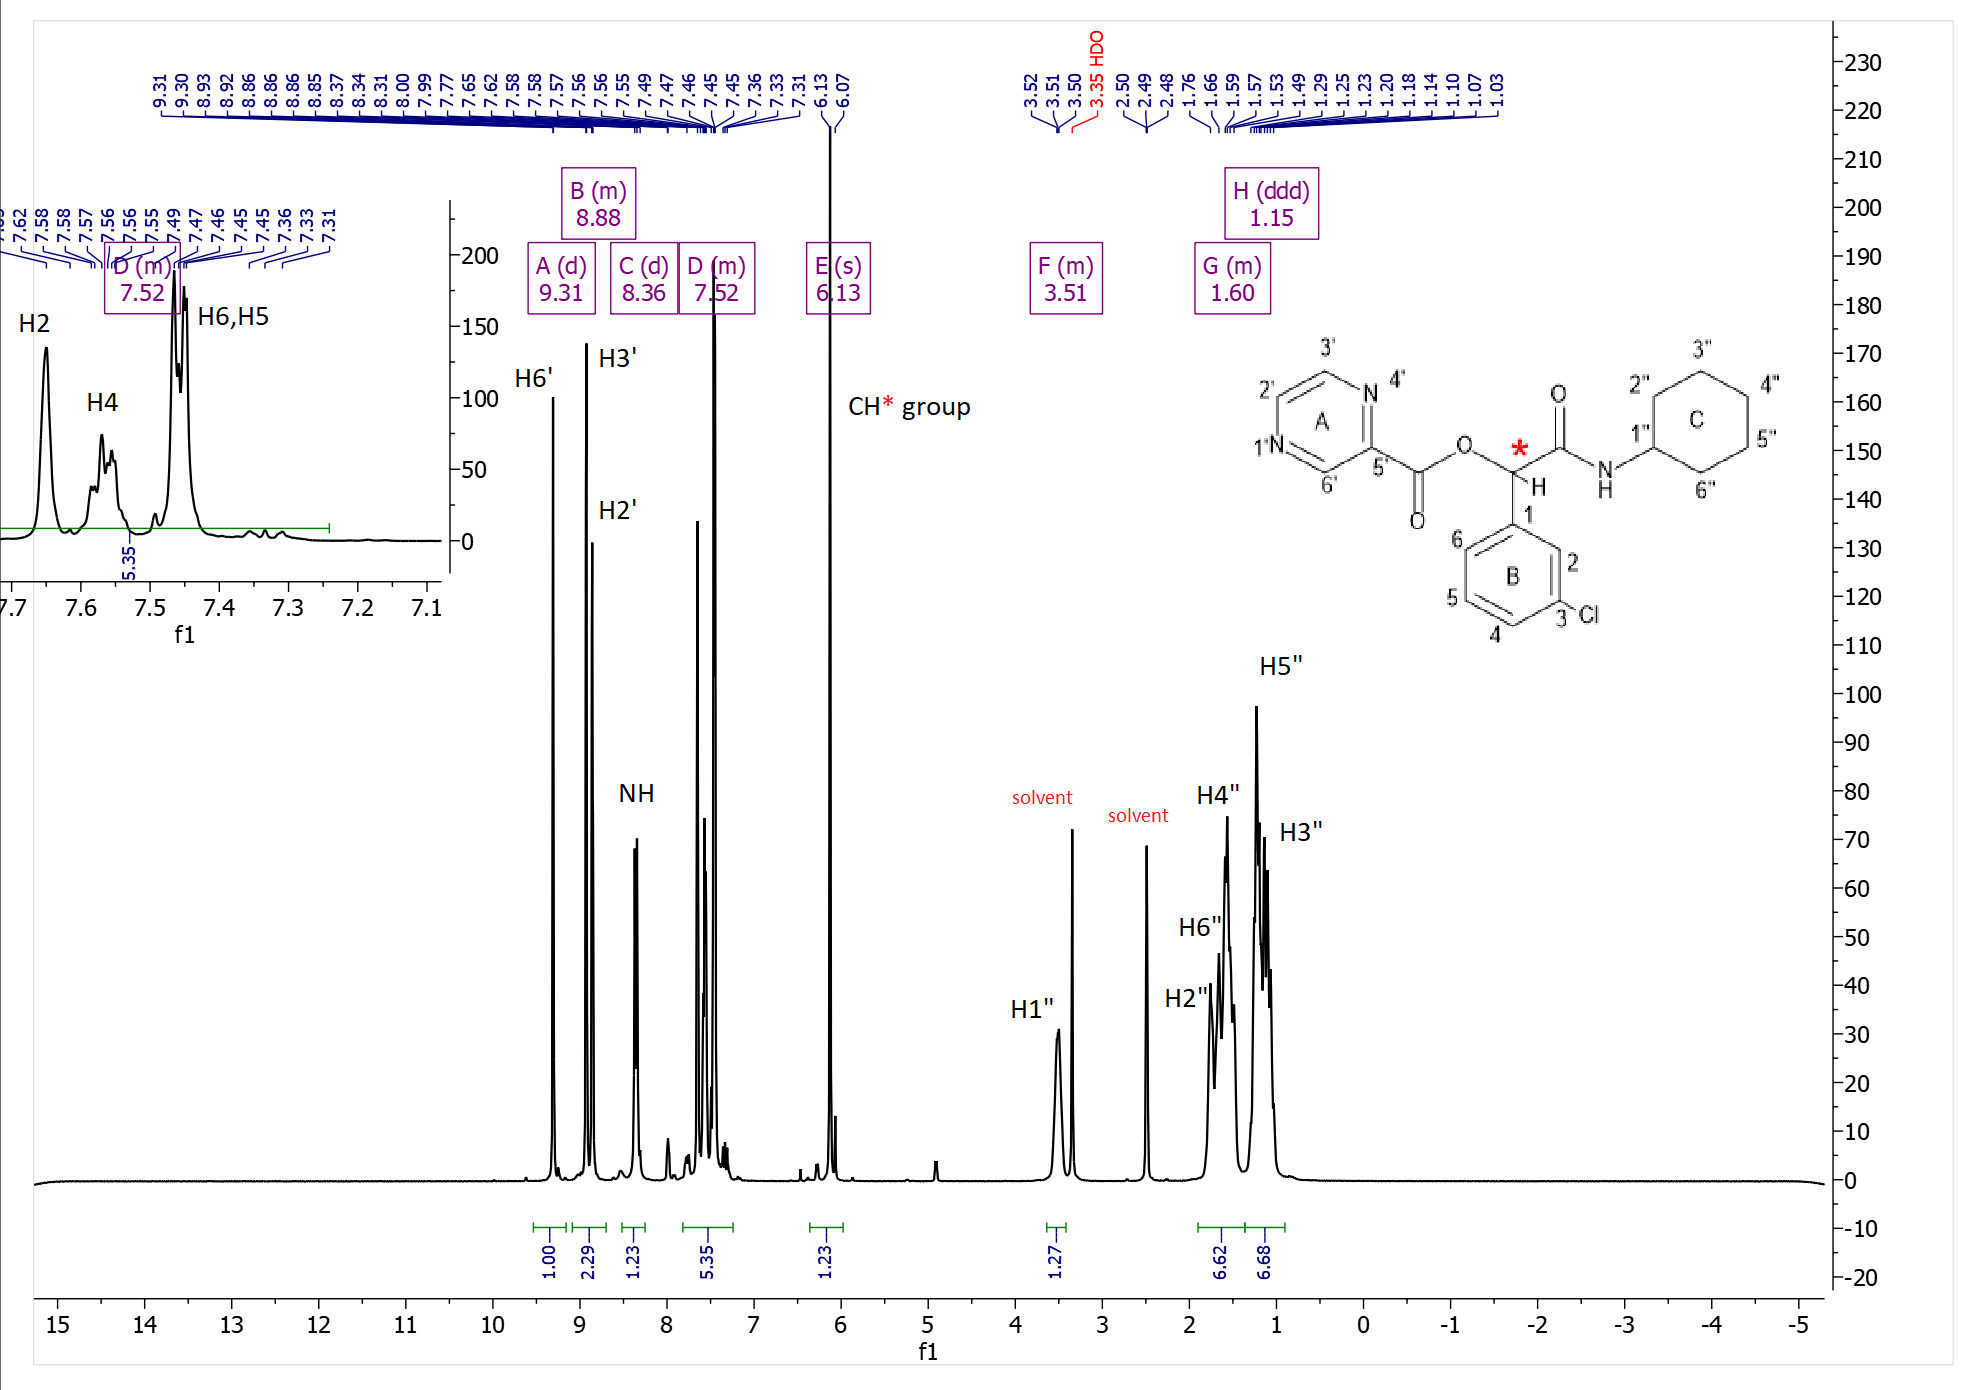


**Figure S49**. 1H-NMR spectrum of **P15**


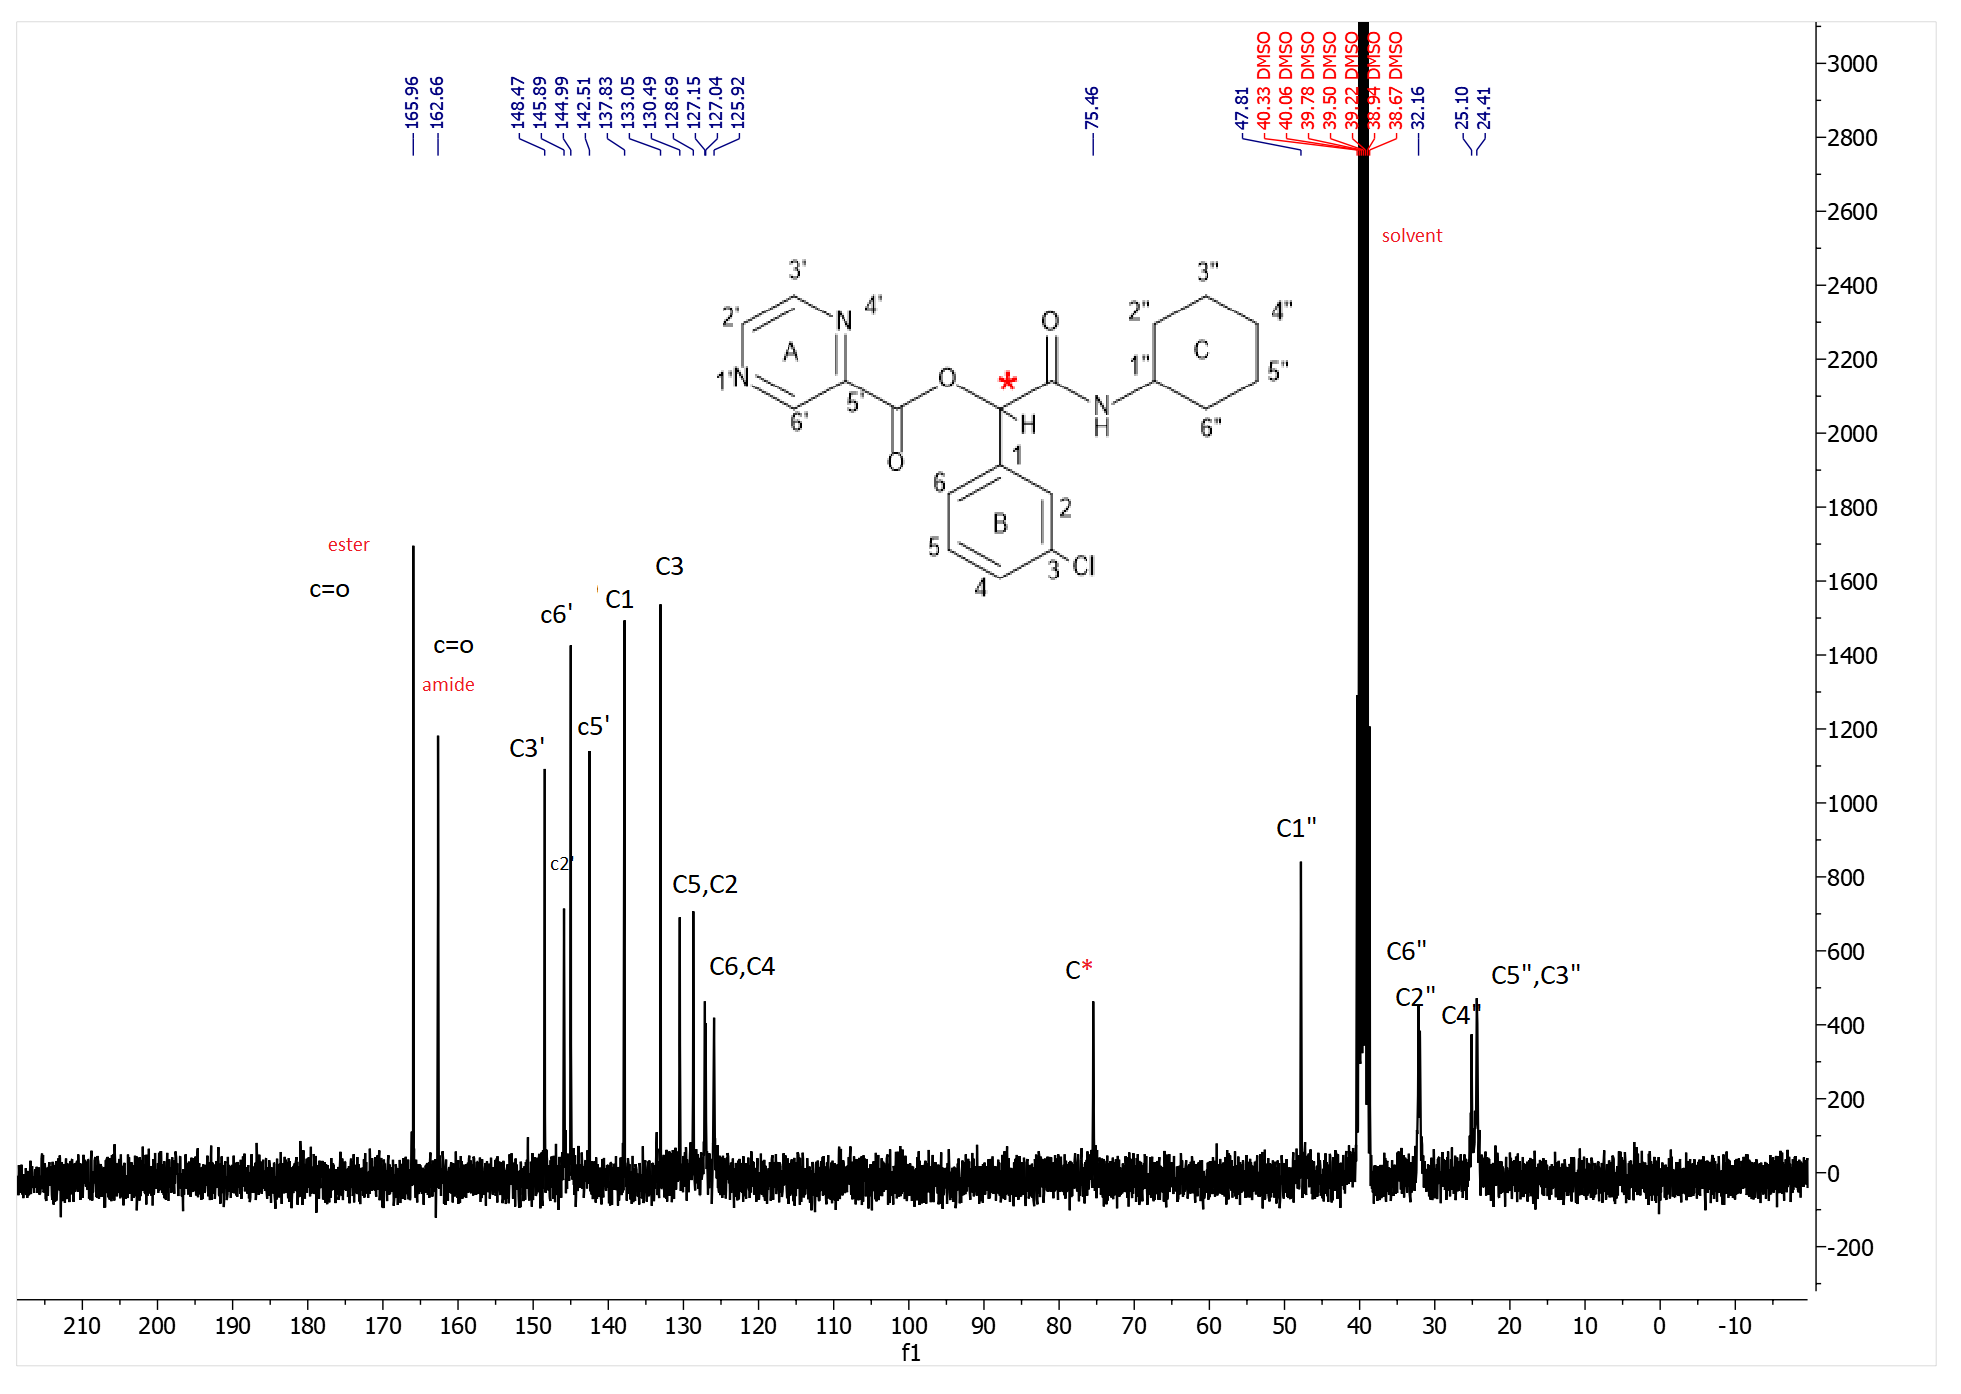


**Figure S50**. 13C-NMR spectrum of **P15**

**1-(4-chlorophenyl)-2-(cyclohexylamino)-2-oxoethyl pyrazine-2-carboxylate(P16)**


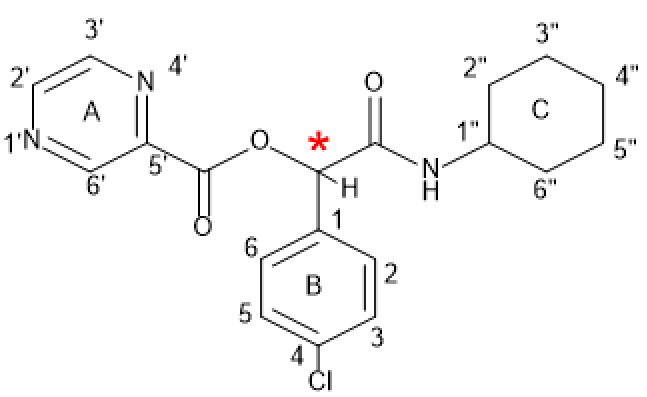


**P16**

Yield: 49%, mp: 139-141°C, white solid. IR (KBr disk): (3308.64 (NH amid group)), (3061.78-3029.67 (CH aromatic)), (2938.15-2850.61(CH aliphatic)), (1738.85(C=O ester)), (1649.84(C=O amid)), (1536.92-1449.65 (C=C aromatic)), (1133.88 (C-O)), (755.87 (C-Cl)) cm-1. 1H NMR (300 MHz, DMSO-d6) δ (9.30 (s, 1H) H6’), (8.88 (d, *J* = 20.6 Hz, 2H) H3’,2’), (8.33 (d, *J* = 7.6 Hz, 1H) NH), (7.80 – 7.30 (m, 4H) H2,3,5.6 overlapping multiple), (6.13 (s, 1H) CH*), (3.50 (s, 1H) H1”), (1.93 – 1.44 (m, 7H) H2”,4”,6”), (1.43 – 0.87 (m, 3H) H5”,3”). 13C NMR (75 MHz, DMSO) δ 166.10, 162.66, 148.41, 145.85, 144.97, 142.54, 134.50, 133.40, 129.18, 128.53, 75.49, 47.76, 40.32, 40.04, 39.76, 39.48, 39.20, 38.93, 38.65, 32.17, 31.97, 25.09, 24.39. Elemental analysis calcd (%) for C19H20ClN3O3 (373.12):C,61.04; H,5.39; N,11.24;found: C,61.12;H,5.47;N,11.32.


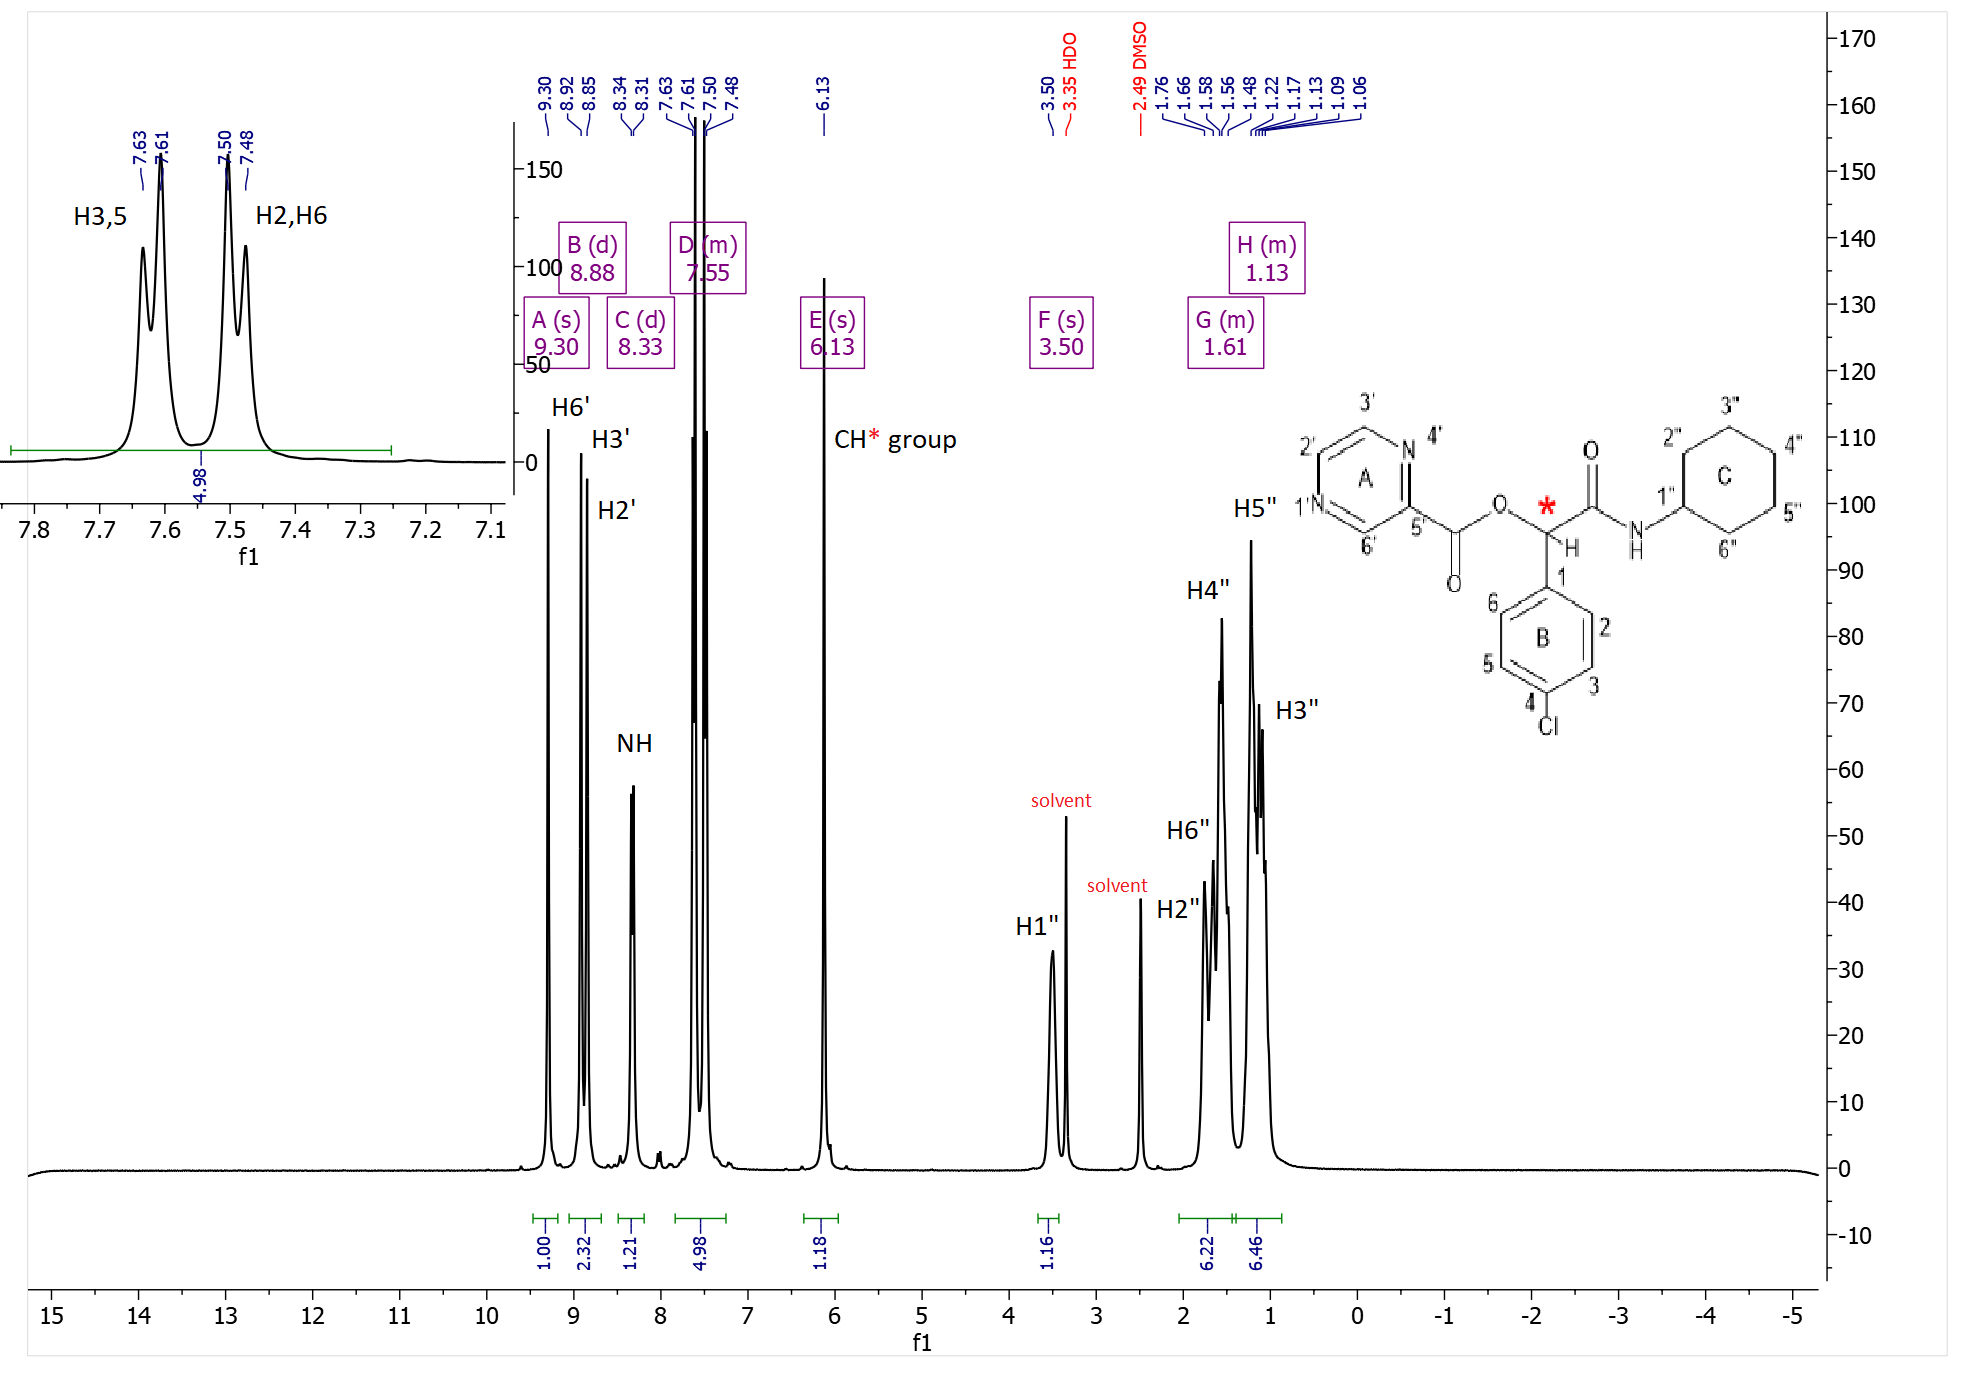


**Figure S51**. 1H-NMR spectrum of **P16**


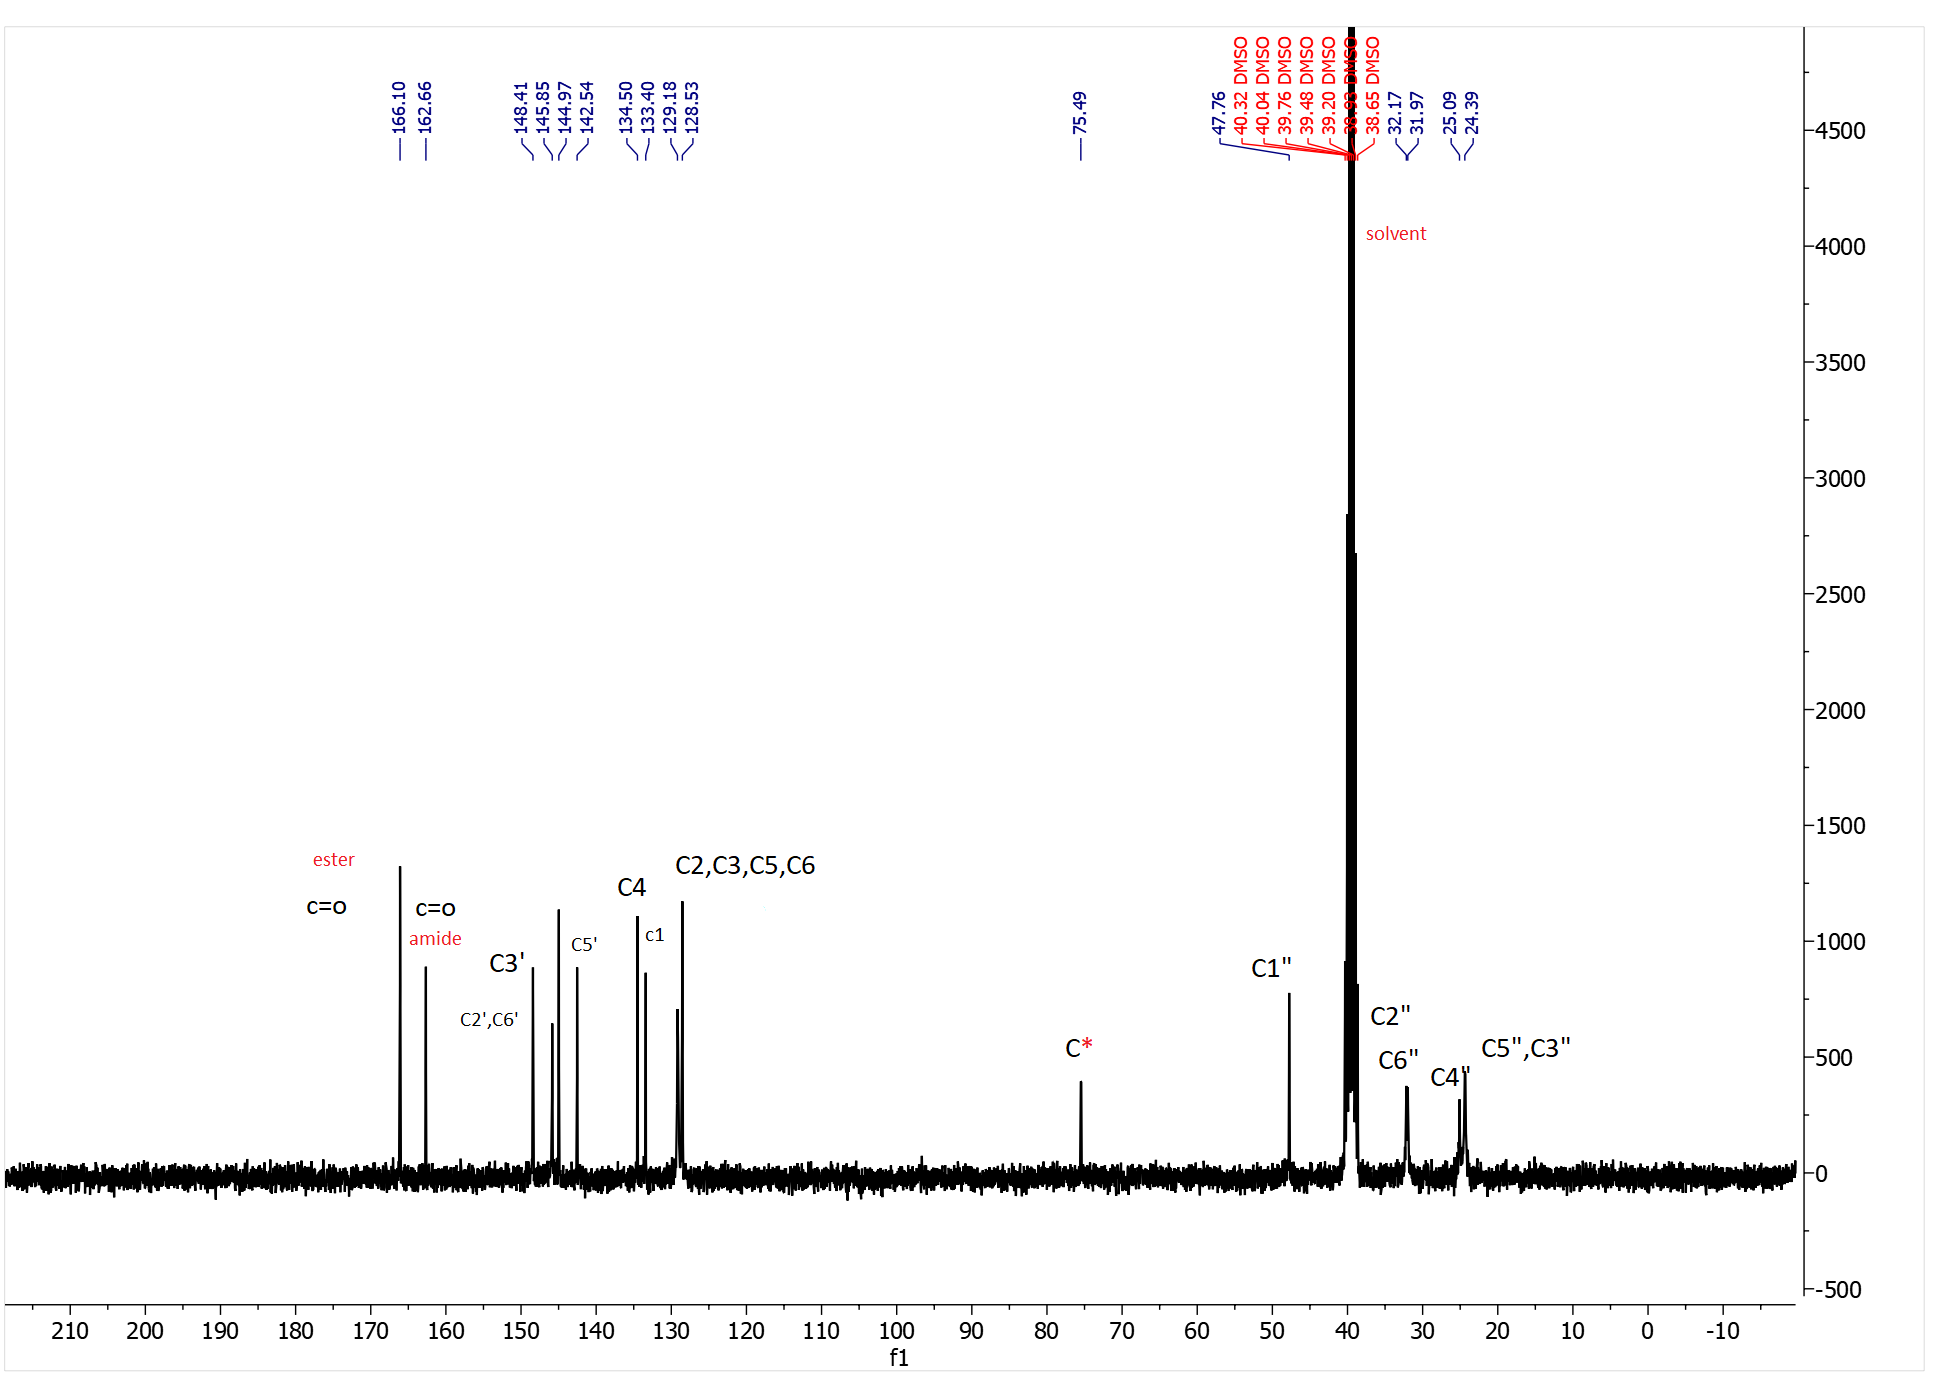


**Figure S52**. 13C-NMR spectrum of **P16**


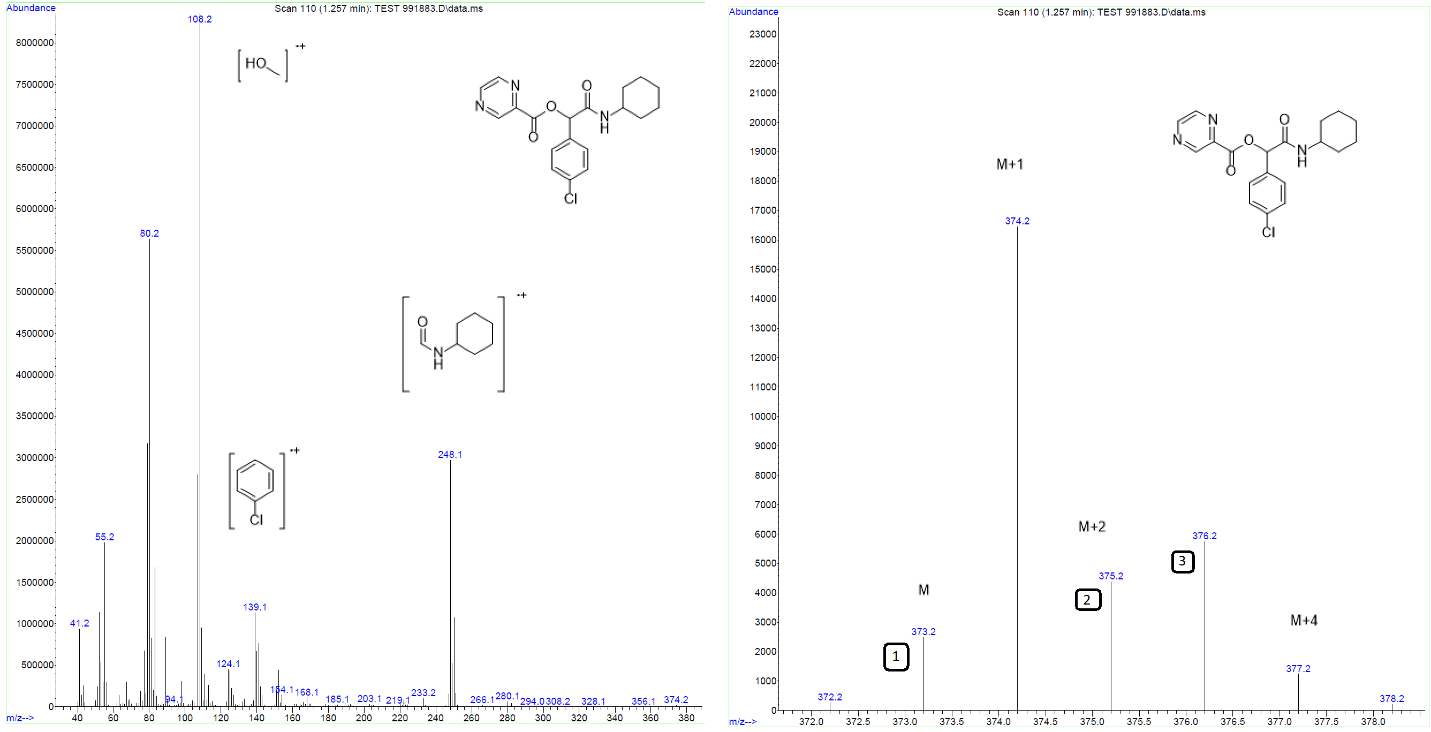


**Figure S53**. Mass spectrum of **P16**

**2-(cyclohexylamino)-1-(2,4-dichlorophenyl)-2-oxoethyl pyrazine-2-carboxylate(P17)**


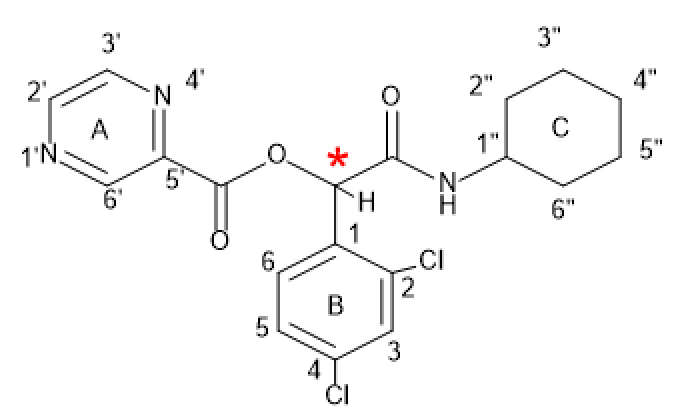


**P17**

Yield: 77%, mp: 164-166°C, white solid. IR (KBr disk): (3325.35 (NH amid group)), (3061.78-3029.67 (CH aromatic)), (2938.15-2850.61(CH aliphatic)), (1738.85(C=O ester)), (1649.84(C=O amid)), (1536.92-1449.65 (C=C aromatic)), (1133.88 (C-O)), (755.87 (C-Cl)) cm-1. 1H NMR (499 MHz, DMSO-*d*6) δ (9.26 (s, 1H) H6’), (9.03 – 8.78 (m, 2H) H3’,2’), (8.36 (d, *J* = 7.7 Hz, 1H) NH), (7.72 (s, 1H) H3), (7.53 (q, *J* = 8.7 Hz, 2H) H6,5), (6.44 (s, 1H) CH*), 3.61 (s, 1H) H1”), (1.94 – 1.41 (m, 6H) H2”,4”,6”), (1.37 – 0.92 (m, 4H) H5”,3”). 13C NMR (126 MHz, dmso) δ 165.31, 163.10, 149.00, 146.35, 145.47, 142.77, 135.12, 135.05, 132.86, 131.48, 129.66, 128.29, 73.08, 48.56, 40.49, 40.32, 40.16, 39.99, 39.82, 39.65, 39.49, 32.50, 32.48, 25.57, 24.95, 24.91. . Elemental analysis calcd (%) for C19H19Cl2N3O3 (407.08):C,55.89; H,4.69; N,10.29;found: C,57.01;H,5.76;N,11.41.


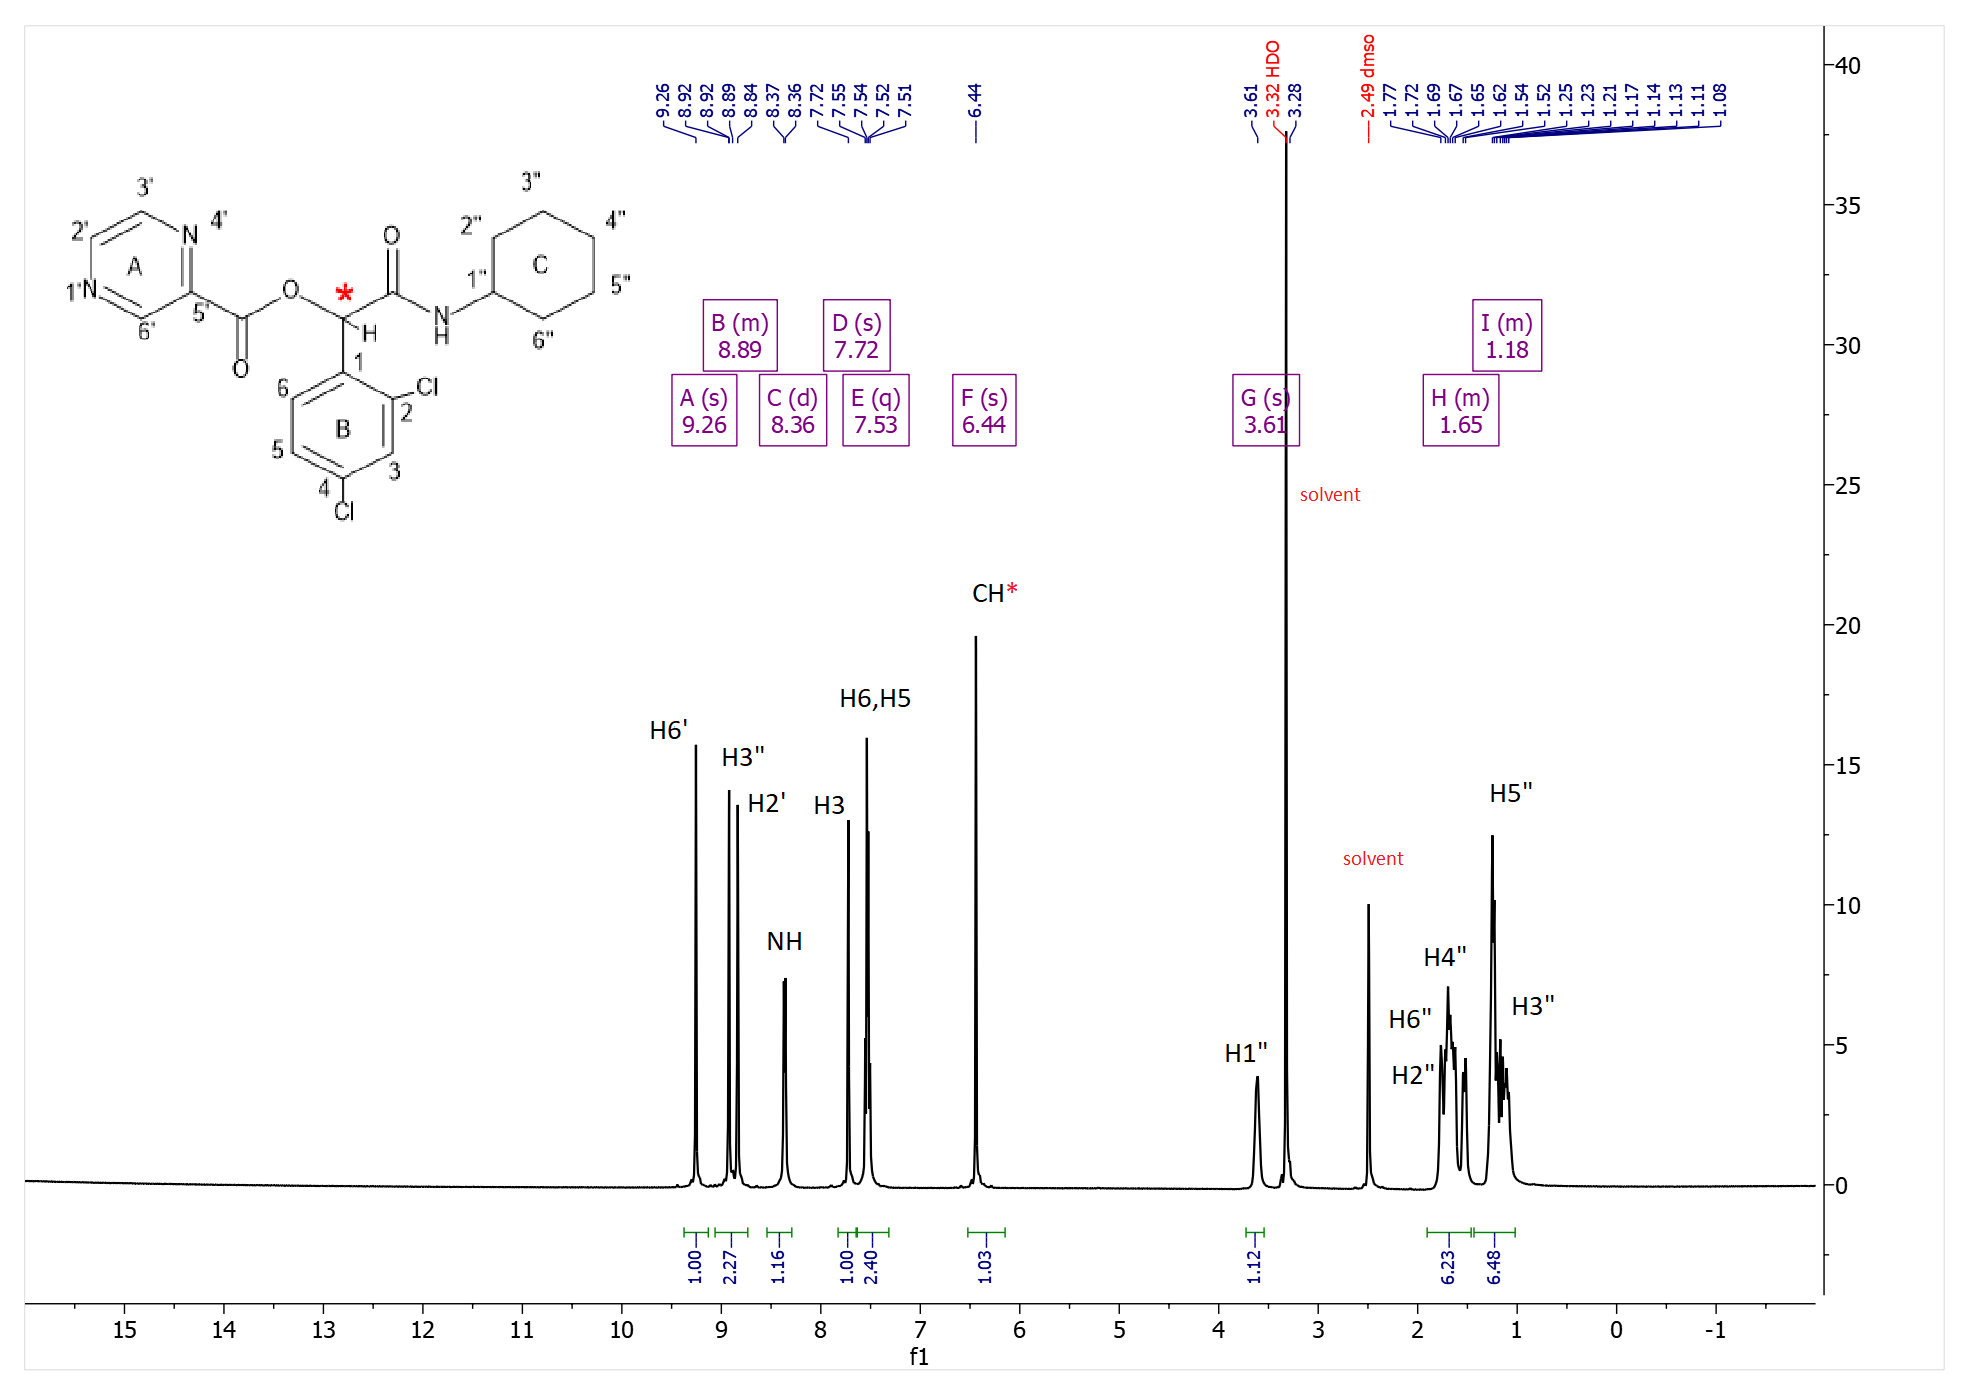


**Figure S54**. 1H-NMR spectrum of **P17**


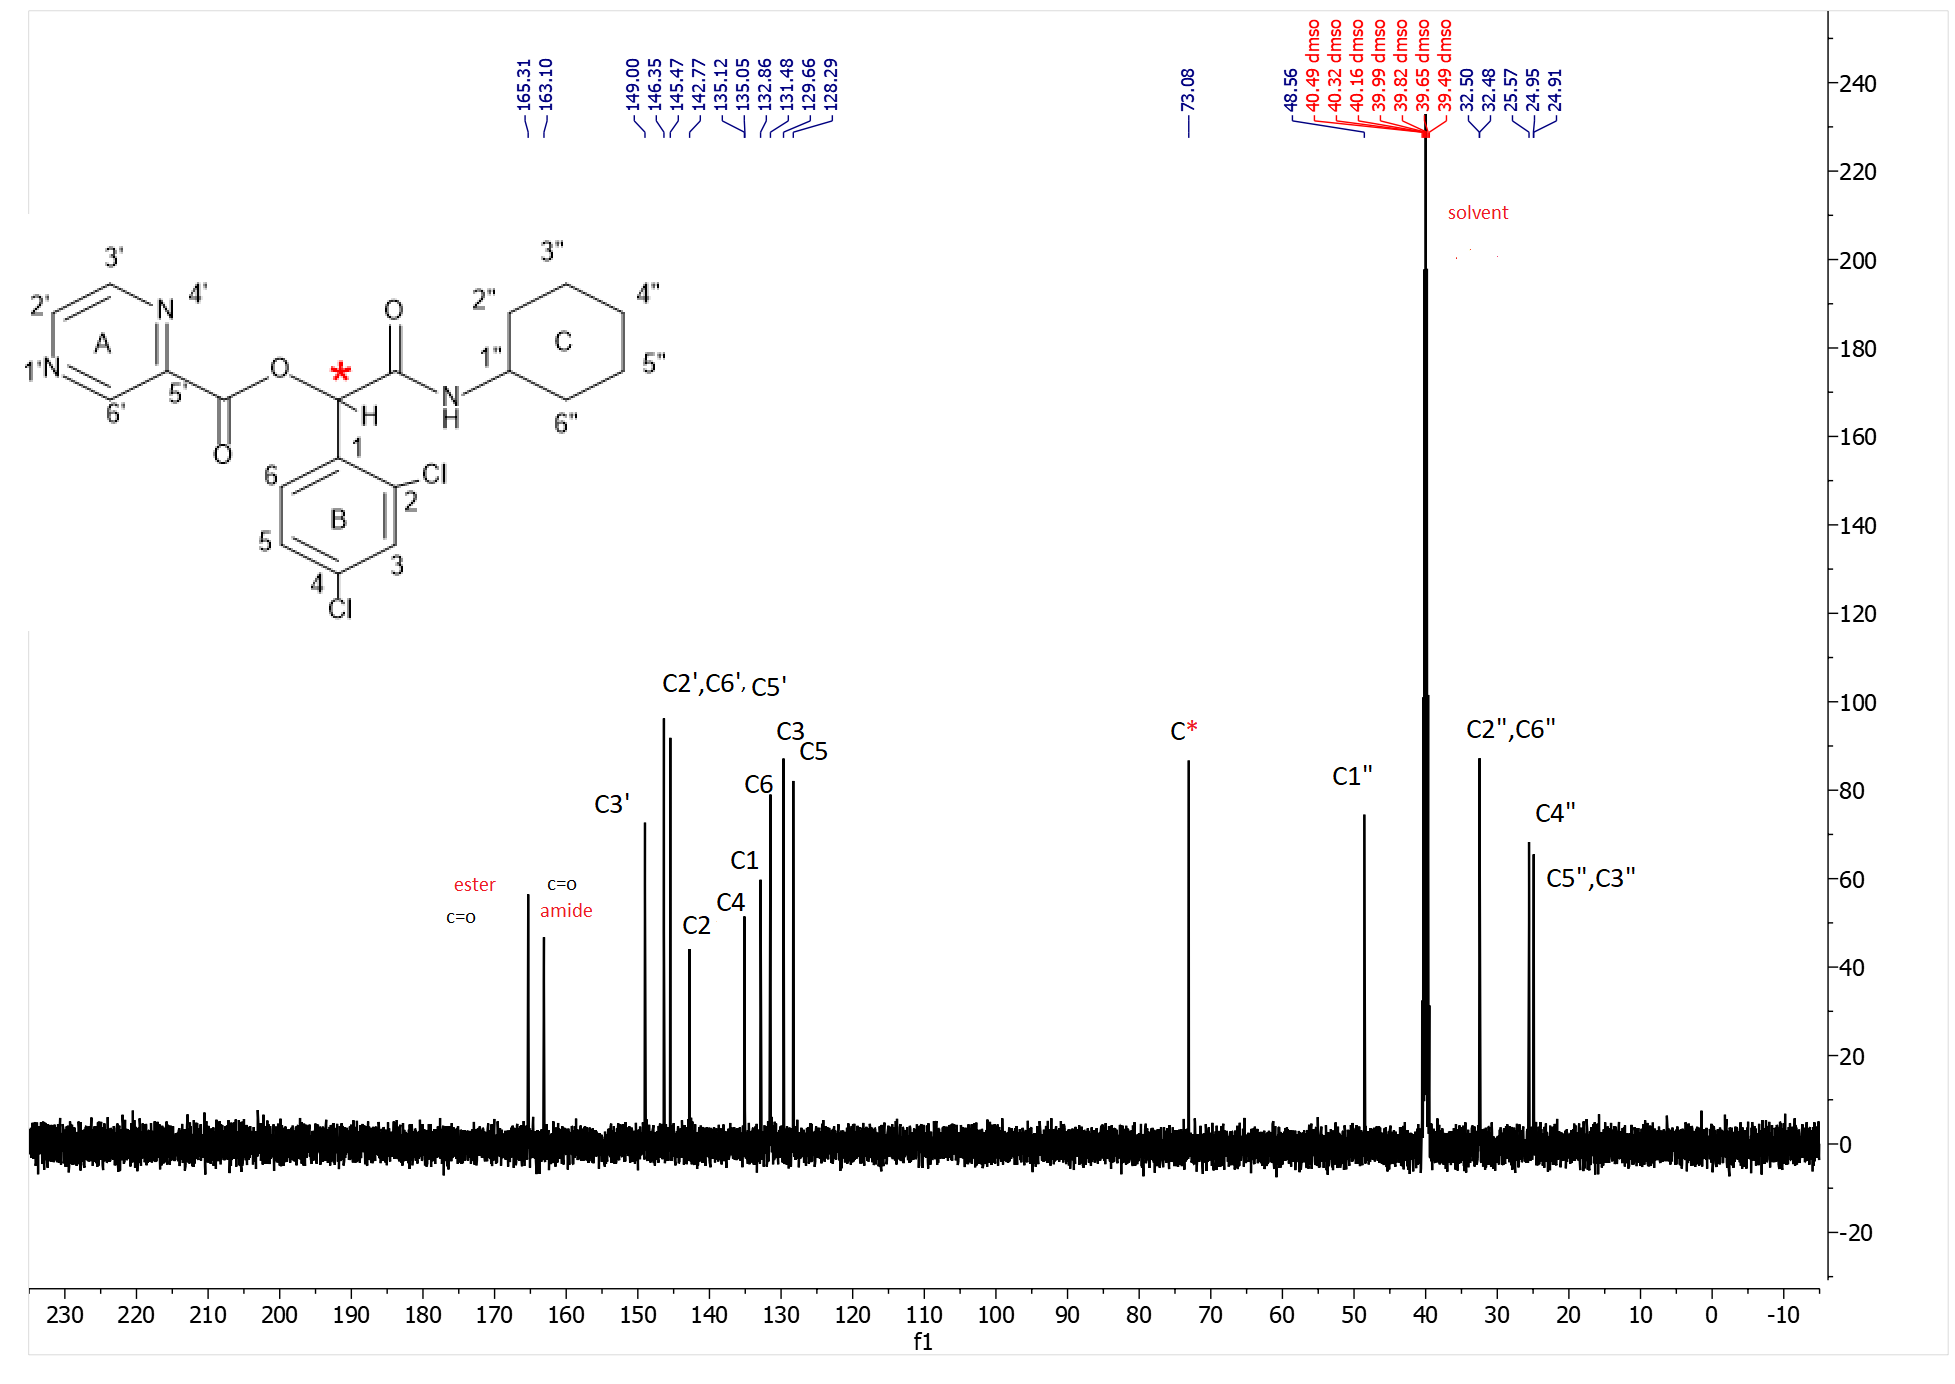


**FigureS55**. 13C-NMR spectrum of **P17**


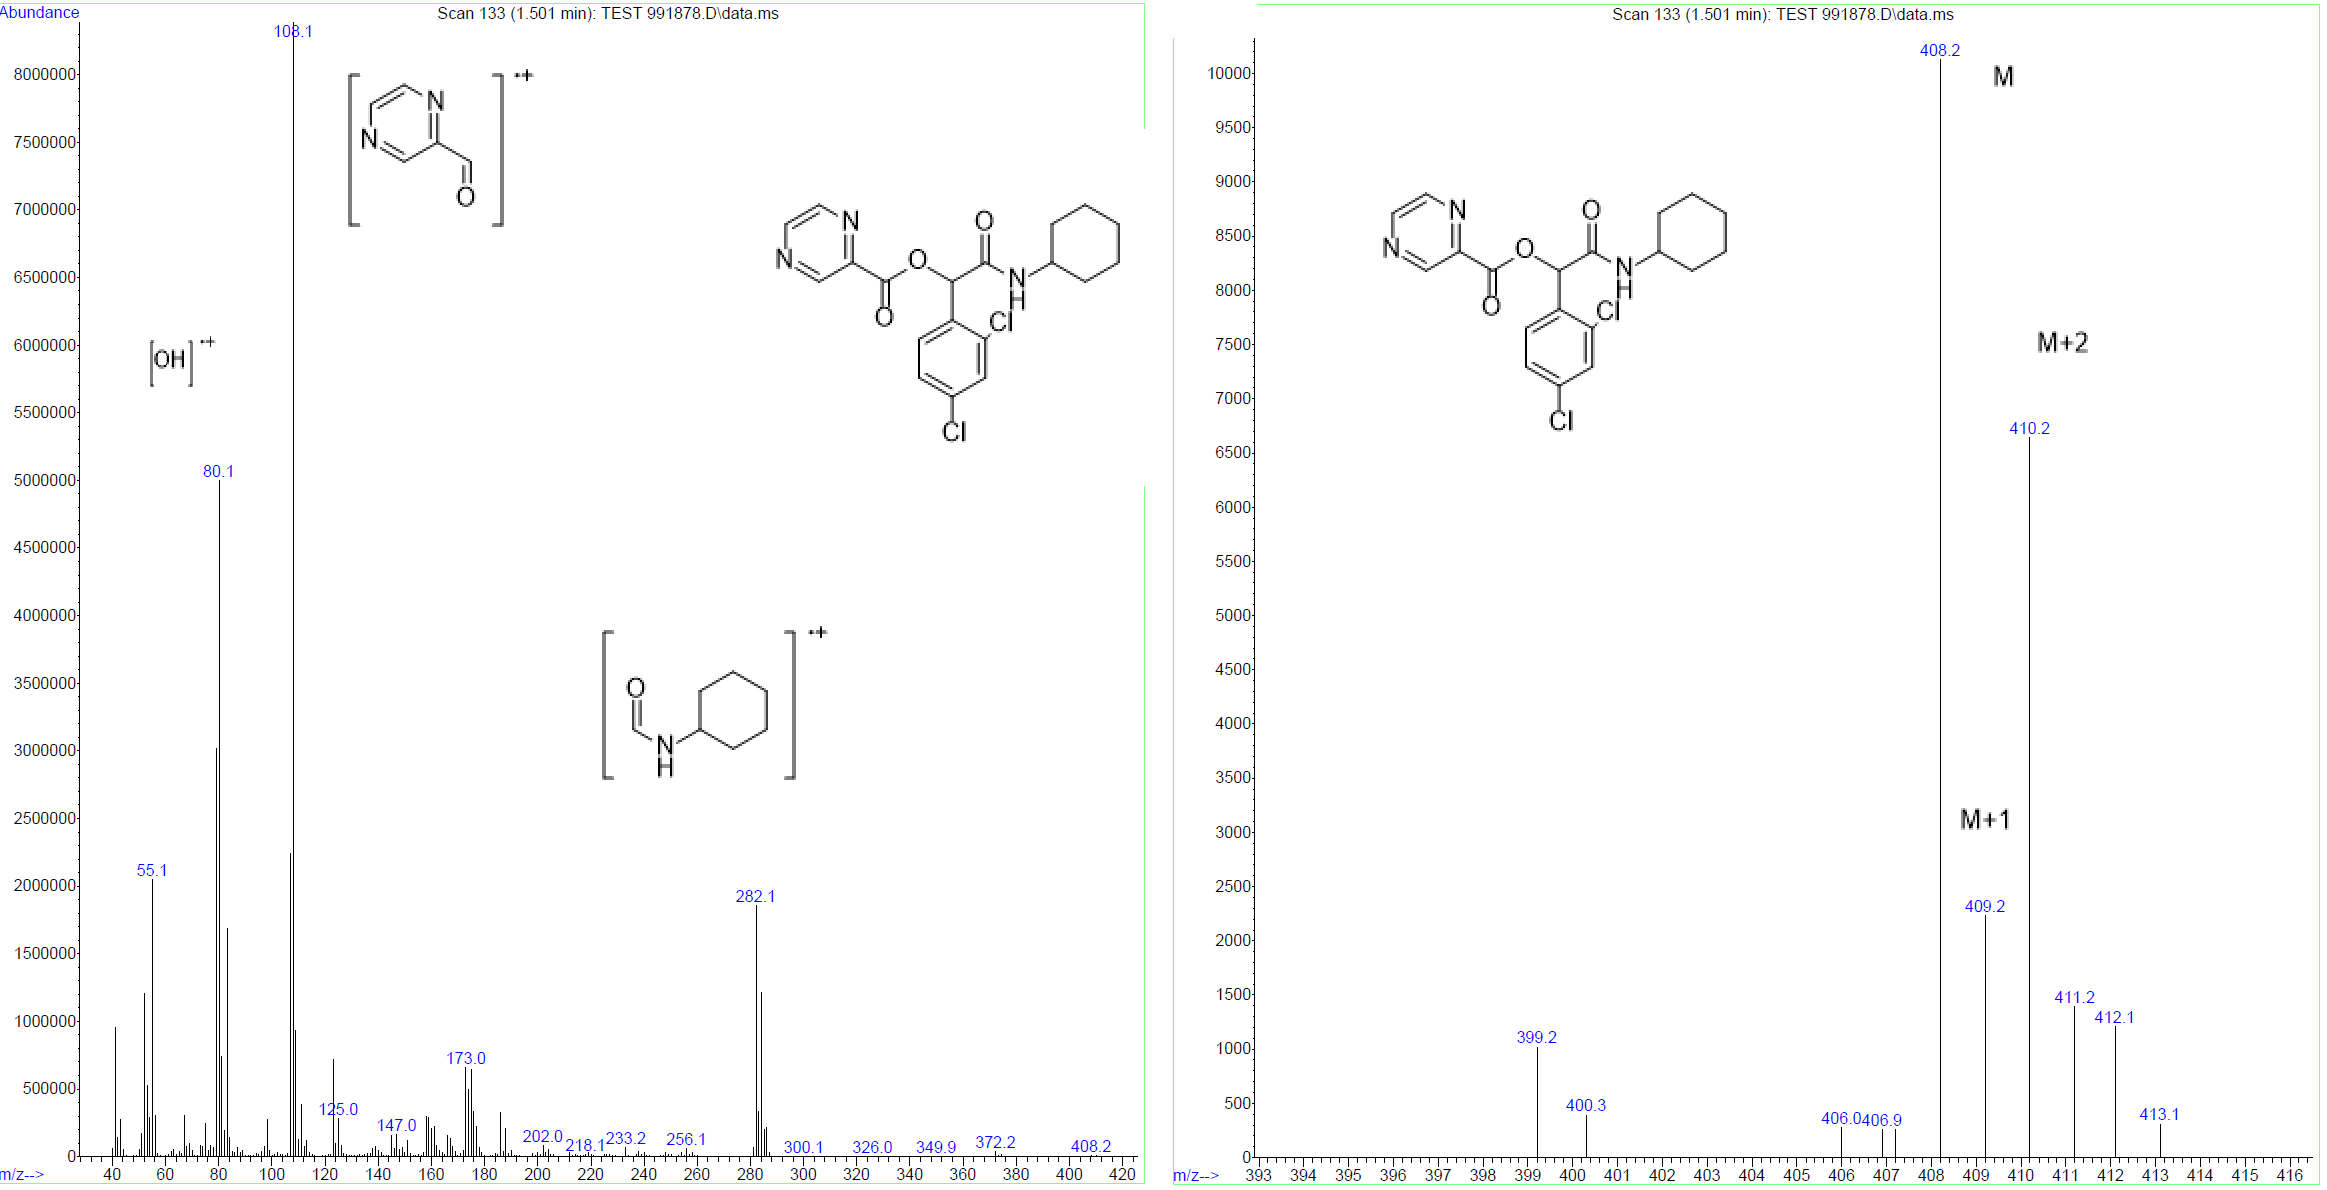


**Figure S56**. Mass spectrum of **P17**

**2-(cyclohexylamino)-2-oxo-1-(p-tolyl)ethyl pyrazine-2-carboxylate(p18)**


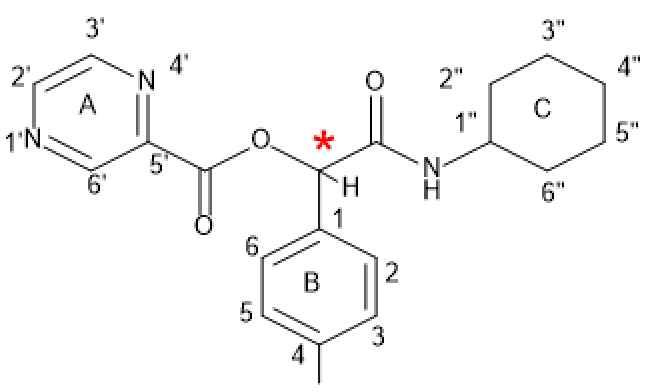


**P18**

Yield: 48%, mp: 180-182°C, white solid. IR (KBr disk): (3275.50 (NH amid group)), (3068.59-3037.58 (CH aromatic)), (2939.29-2855.41 (CH aliphatic)), (1731.89 (C=O ester)), (1656.44 (C=O amid)), (1545.71-1494.55 (C=C aromatic)), (1127.78 (C-O)) cm-1. 1H NMR (499 MHz, DMSO-*d*6) δ (9.28 (s, 1H) H6’), (8.88 (d, *J* = 35.5 Hz, 2H) H2’.3’), (8.22 (d, *J* = 7.6 Hz, 1H) NH), (7.34 (dd, *J* = 125.5, 7.3 Hz, 4H) H6,5,2,3), (6.08 (s, 1H) CH*), (3.51 (s, 1H) H1”, 2.49 (s, 3H) Me group), (1.85 – 1.33 (m, 6H) H2”,4”,6”), (1.33 – 0.83 (m, 4H) H5”,3”). 13C NMR (126 MHz, dmso) δ 166.96, 163.25, 148.79, 146.24, 145.42, 143.18, 138.55, 133.05, 129.46, 127.85, 76.68, 48.20, 40.33, 40.16, 39.99, 39.83, 39.66, 39.49, 32.69, 32.50, 25.59, 24.93, 24.85, 21.24. Elemental analysis calcd (%) for C20H23N3O3 (353.17):C,67.97; H,6.56; N,11.89;found: C,68;H,6.59;N,11.92.


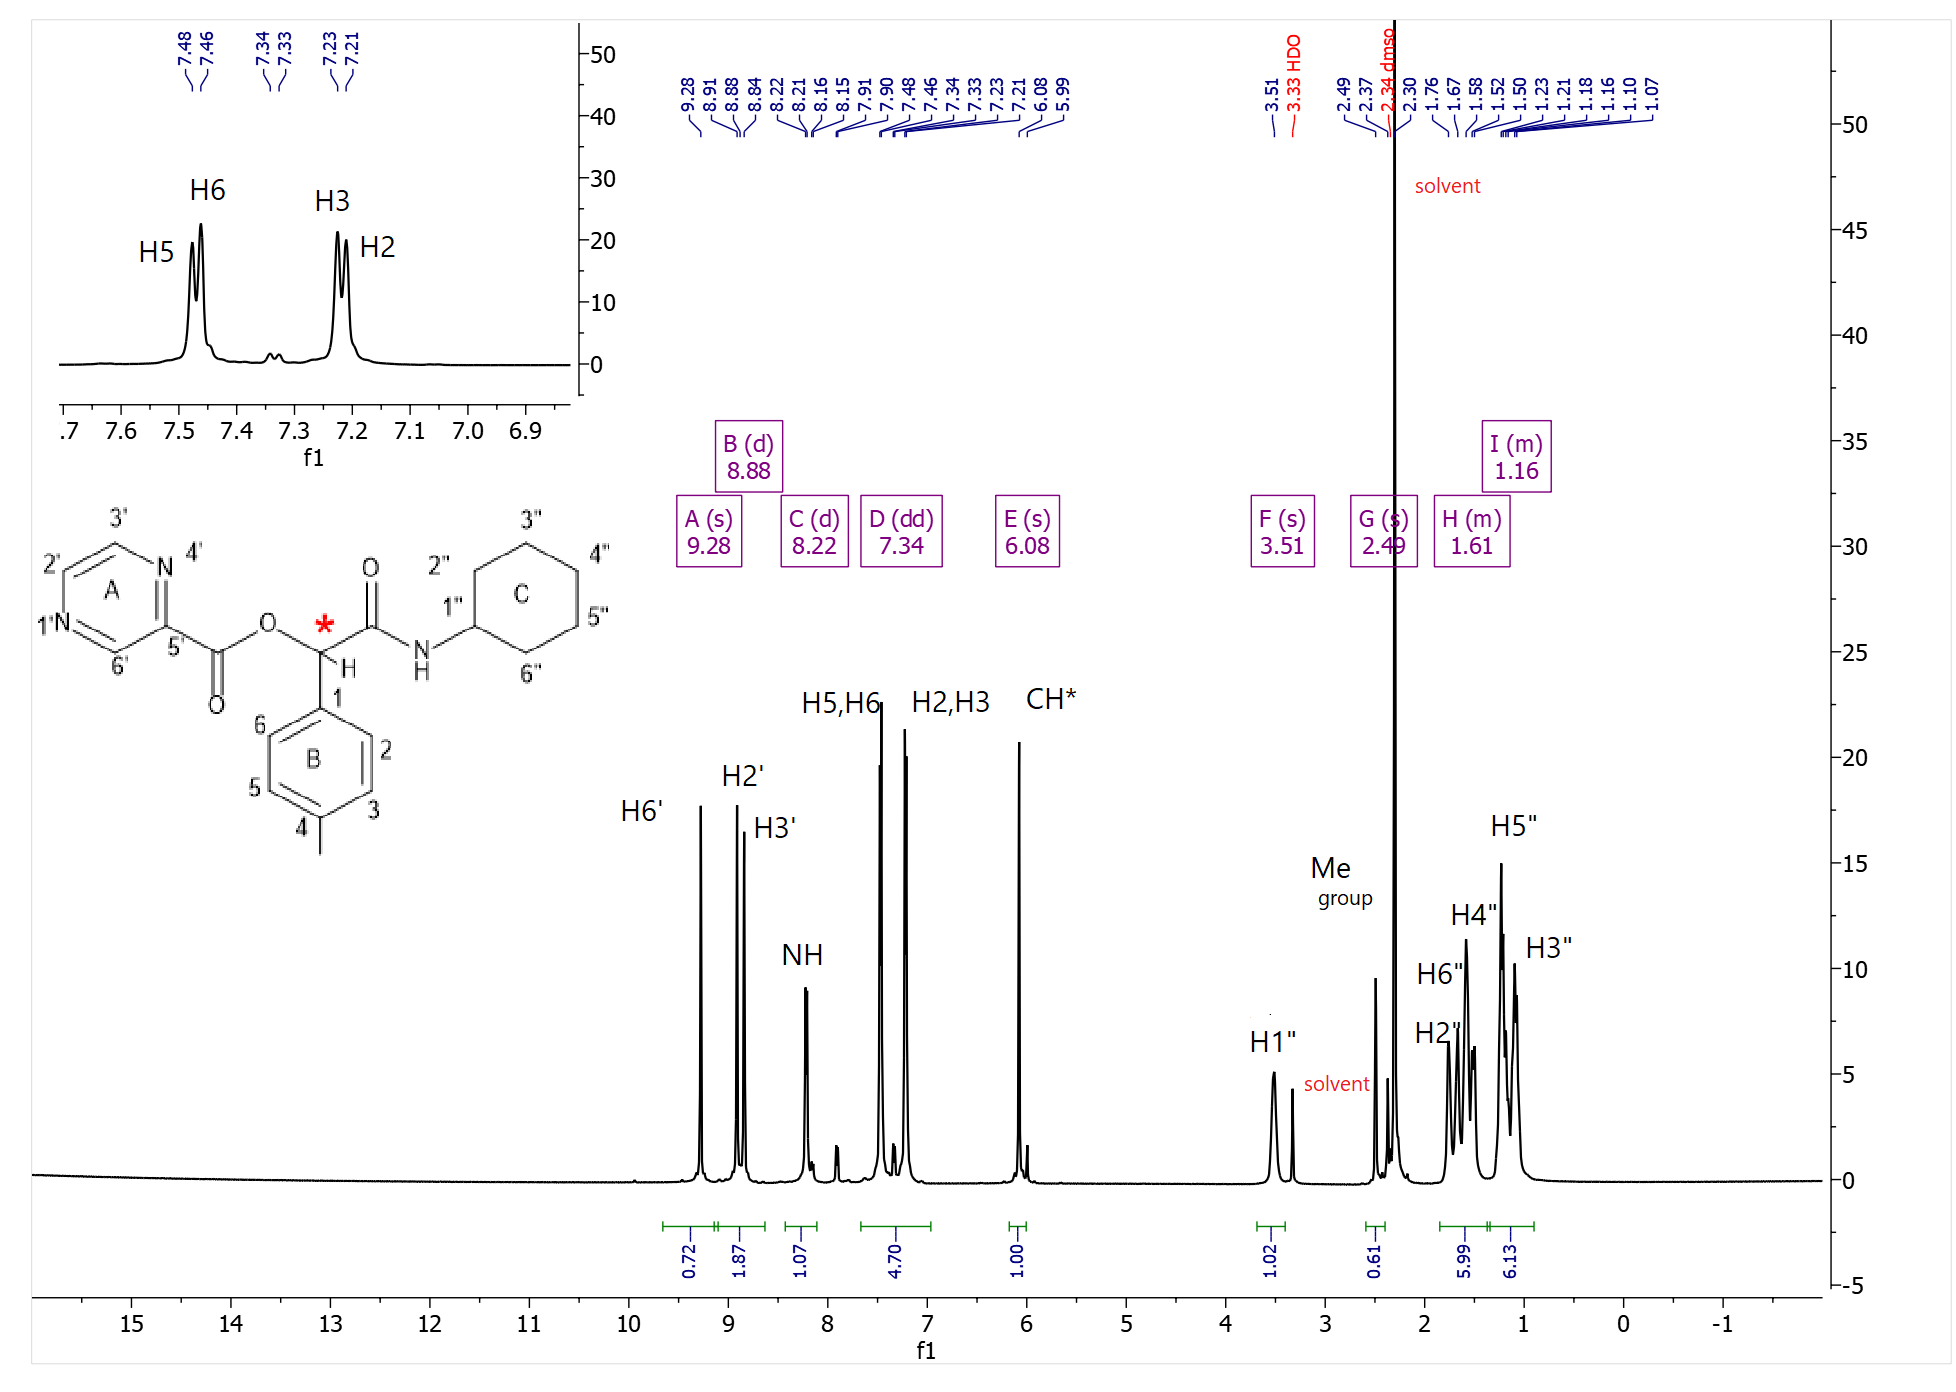


**Figure S57**. 1H-NMR spectrum of **P18**


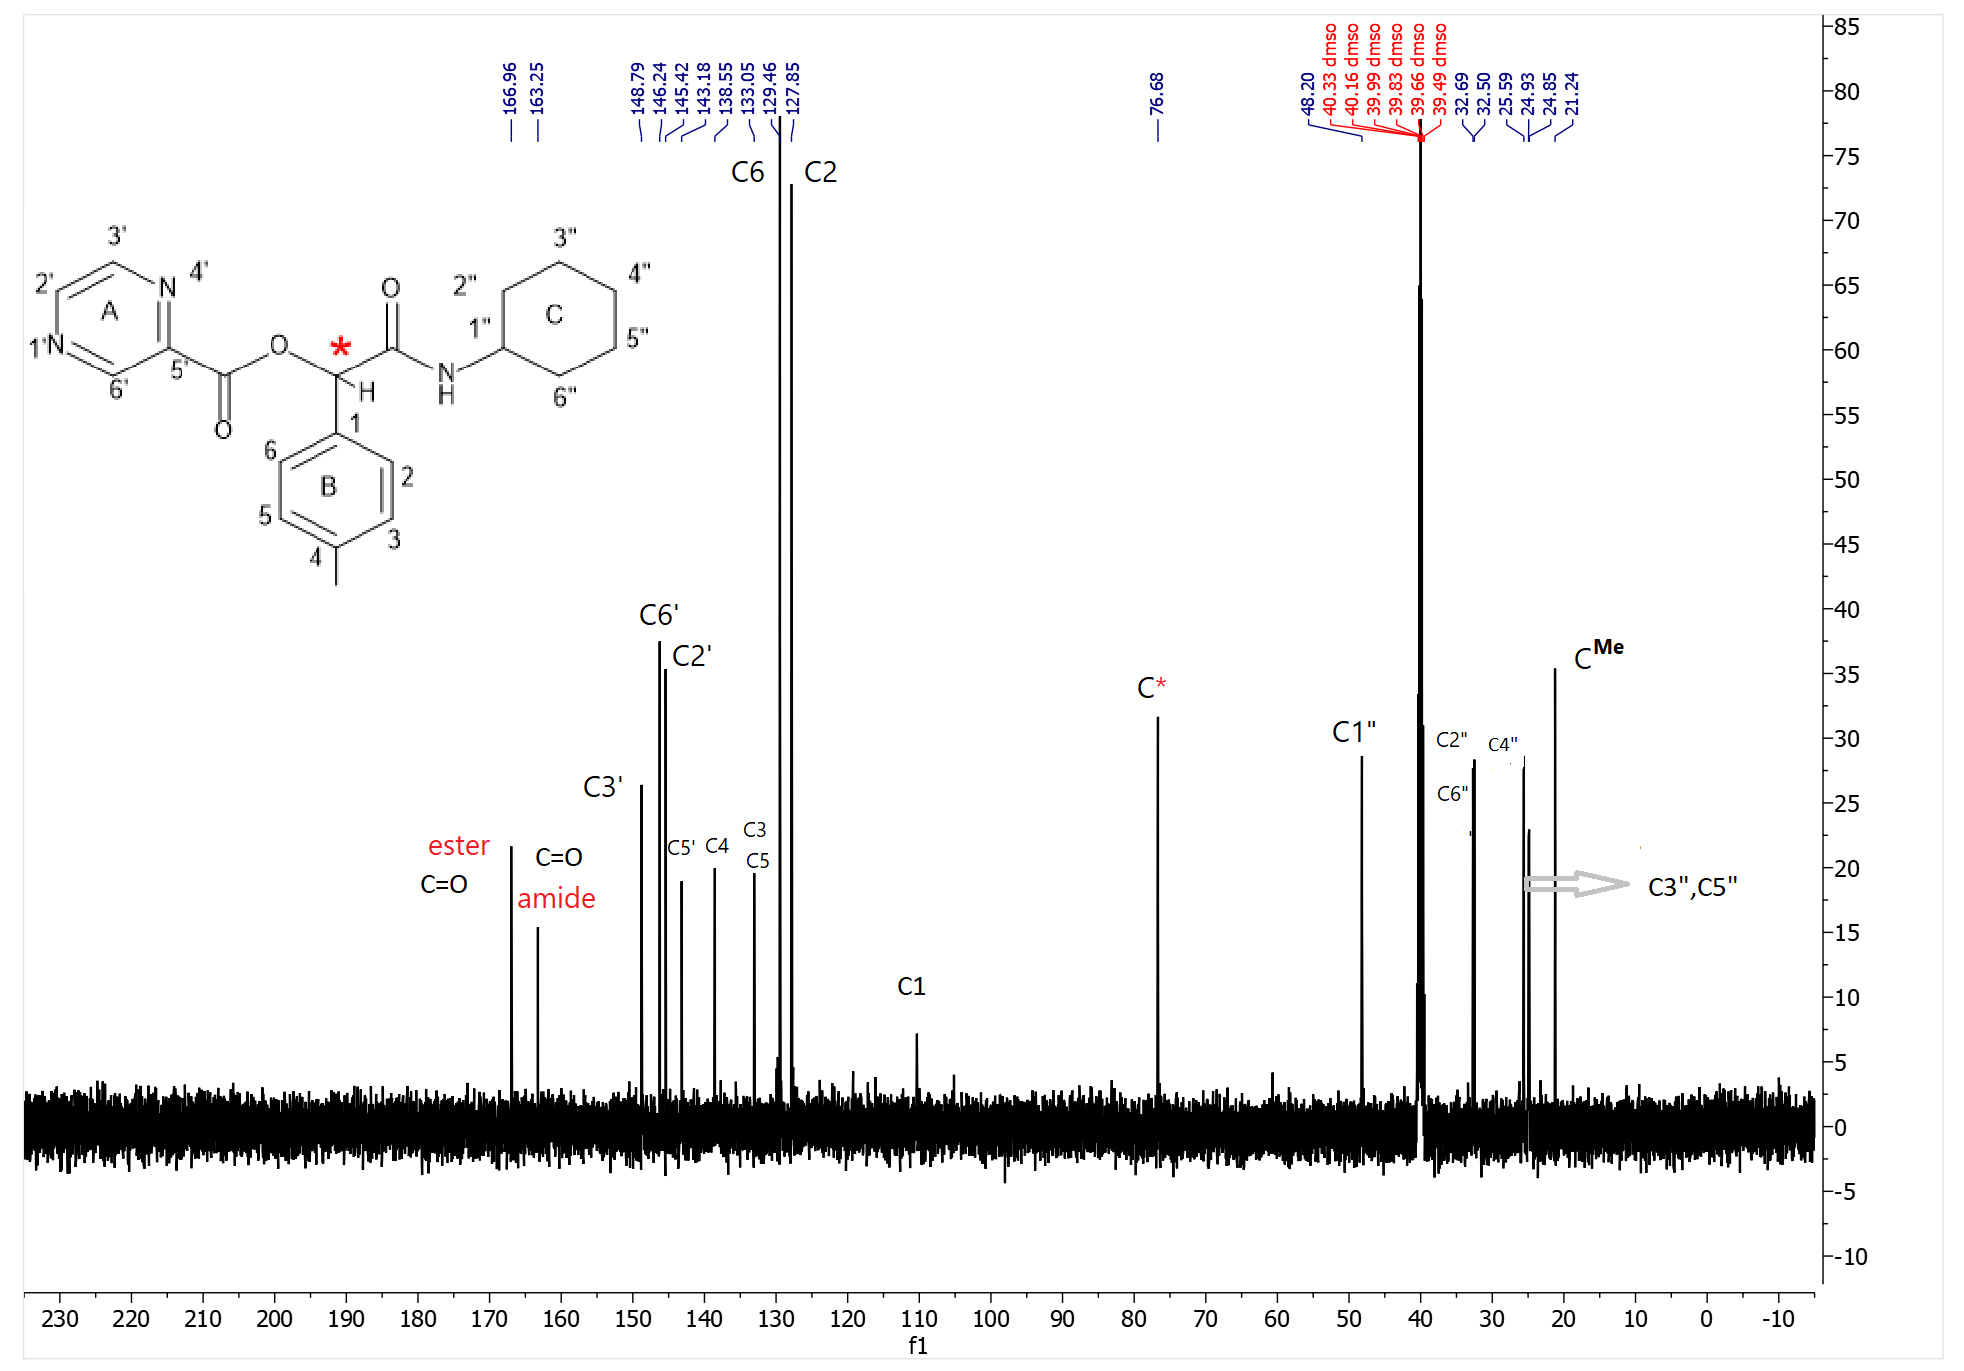


**Figure S58**. 13C-NMR spectrum of **P18**


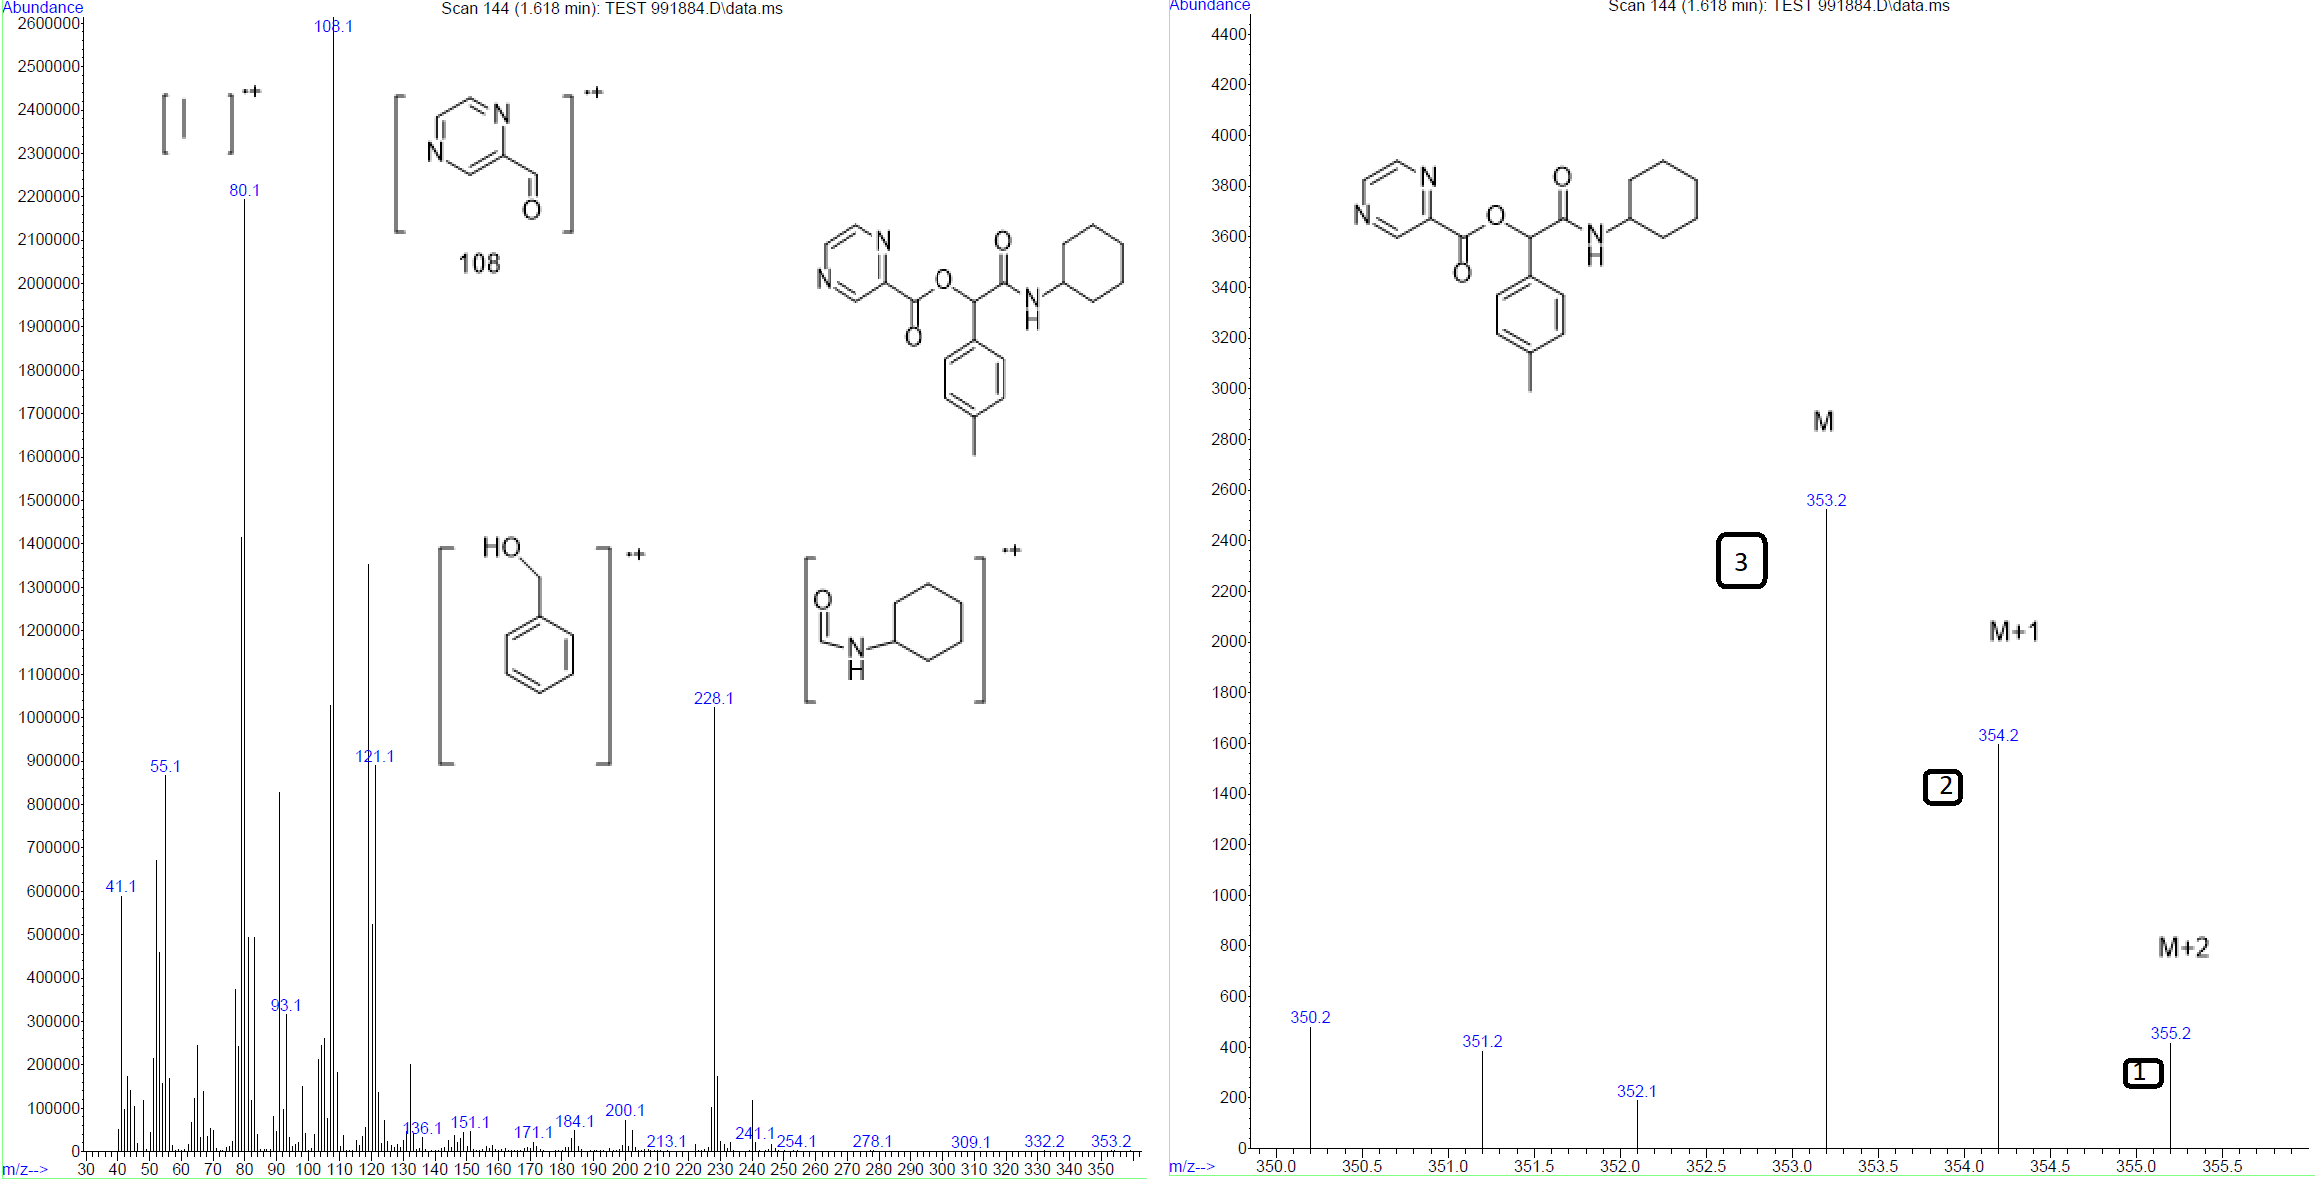


**Figure S59**. Mass spectrum of **P18**

**2-(cyclohexylamino)-2-oxo-1-phenylethyl pyrazine-2-carboxylate(P19)**


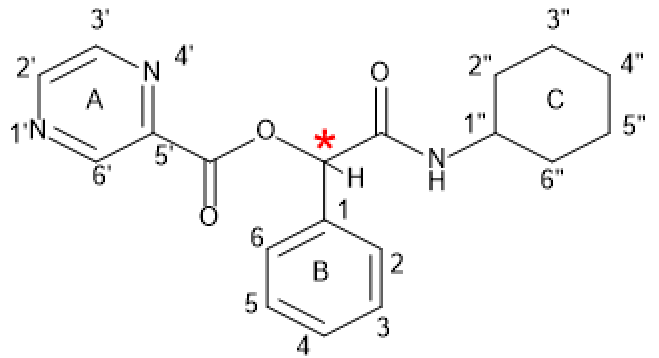


**P19**

Yield: 62%, mp: 172-174°C, white solid. IR (KBr disk): (3315.29 (NH amid group)), (3071.59-3030.32 (CH aromatic)), (2933.82-2857.39 (CH aliphatic)), (1725.84 (C=O ester)), (1665.11(C=O amid)), (1549.11-1498.04 (C=C aromatic)), (1131.69 (C-O)) cm-1.1H NMR (300 MHz, DMSO-*d*6) δ (9.29 (s, 1H) H6’), (9.05 – 8.70 (m, 2H) H3’,2’), (8.29 (d, *J* = 7.8 Hz, 1H)NH), (7.80 – 7.24 (m, 5H) H2,3,4,5,6), (6.09 (d, *J* = 18.1 Hz, 1H) CH*), (3.50 (s, 1H) H1”, (1.88 – 1.35 (m,6H) H2”,4”,6”), (1.41 – 0.84 (m,4 H) H3”,5”). 13C NMR (75 MHz, DMSO) δ 166.78, 166.38, 162.77, 148.37, 145.82, 144.96, 142.64, 135.51, 128.67, 128.46, 127.37, 76.24, 47.73, 40.32, 40.04, 39.76, 39.48, 39.20, 38.93, 38.65, 32.21, 32.01, 25.09, 24.43. Elemental analysis calcd (%) for C19H21N3O3 (339.16):C,67.24; H,6.24; N,12.38;found: C,67.28;H,6.28;N,12.42.


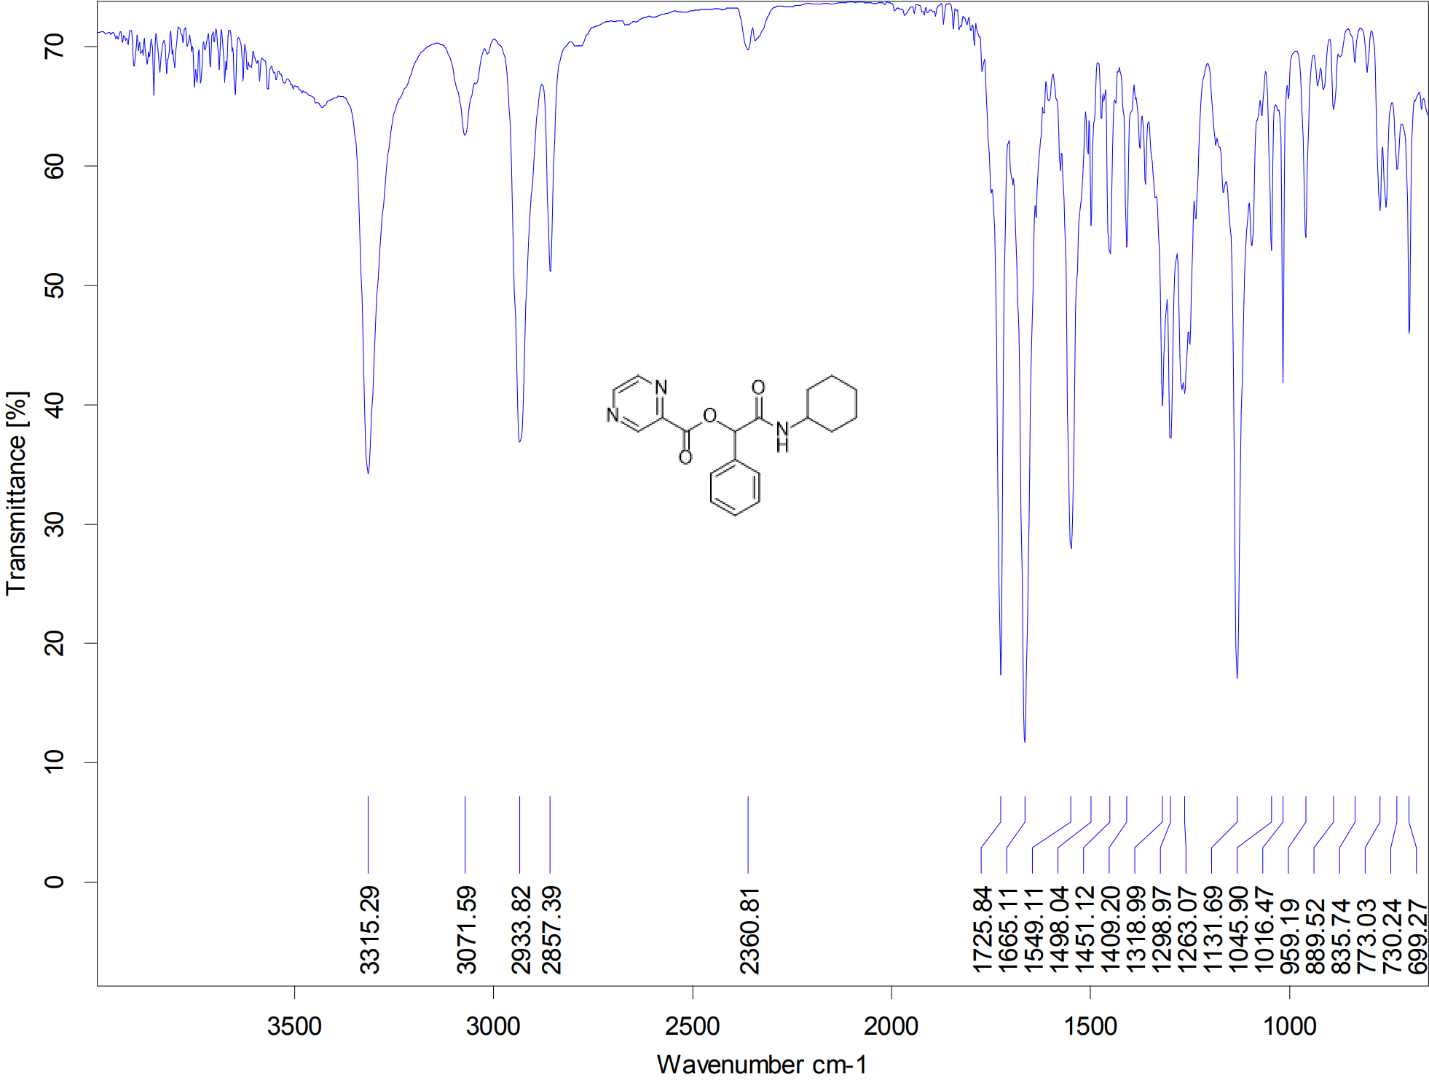


**Figure S60**. IR spectrum of **P19**


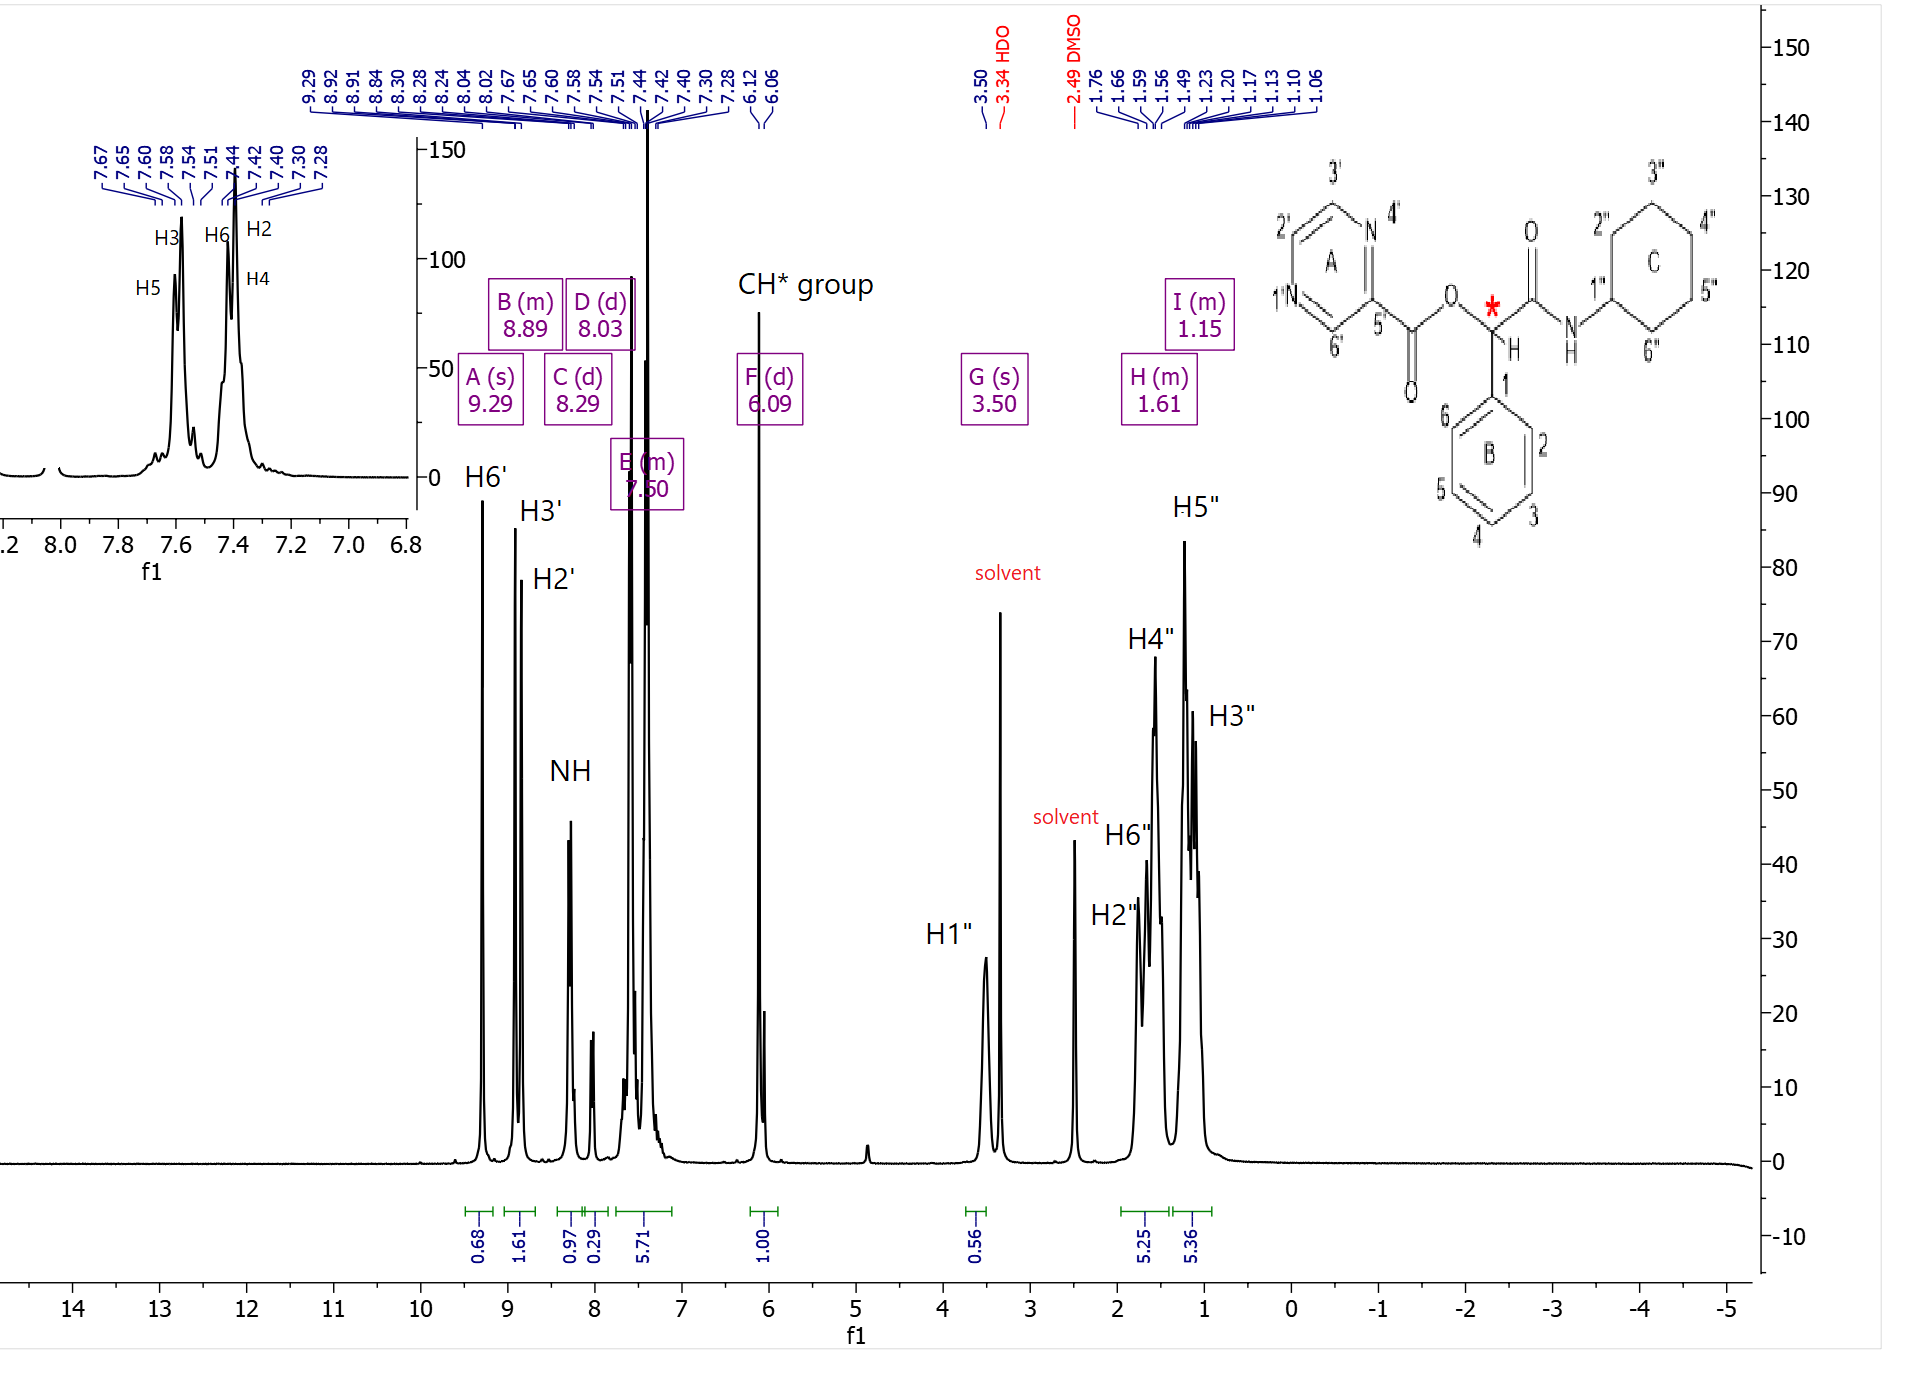


**Figure S61**. 1H-NMR spectrum of **P19**


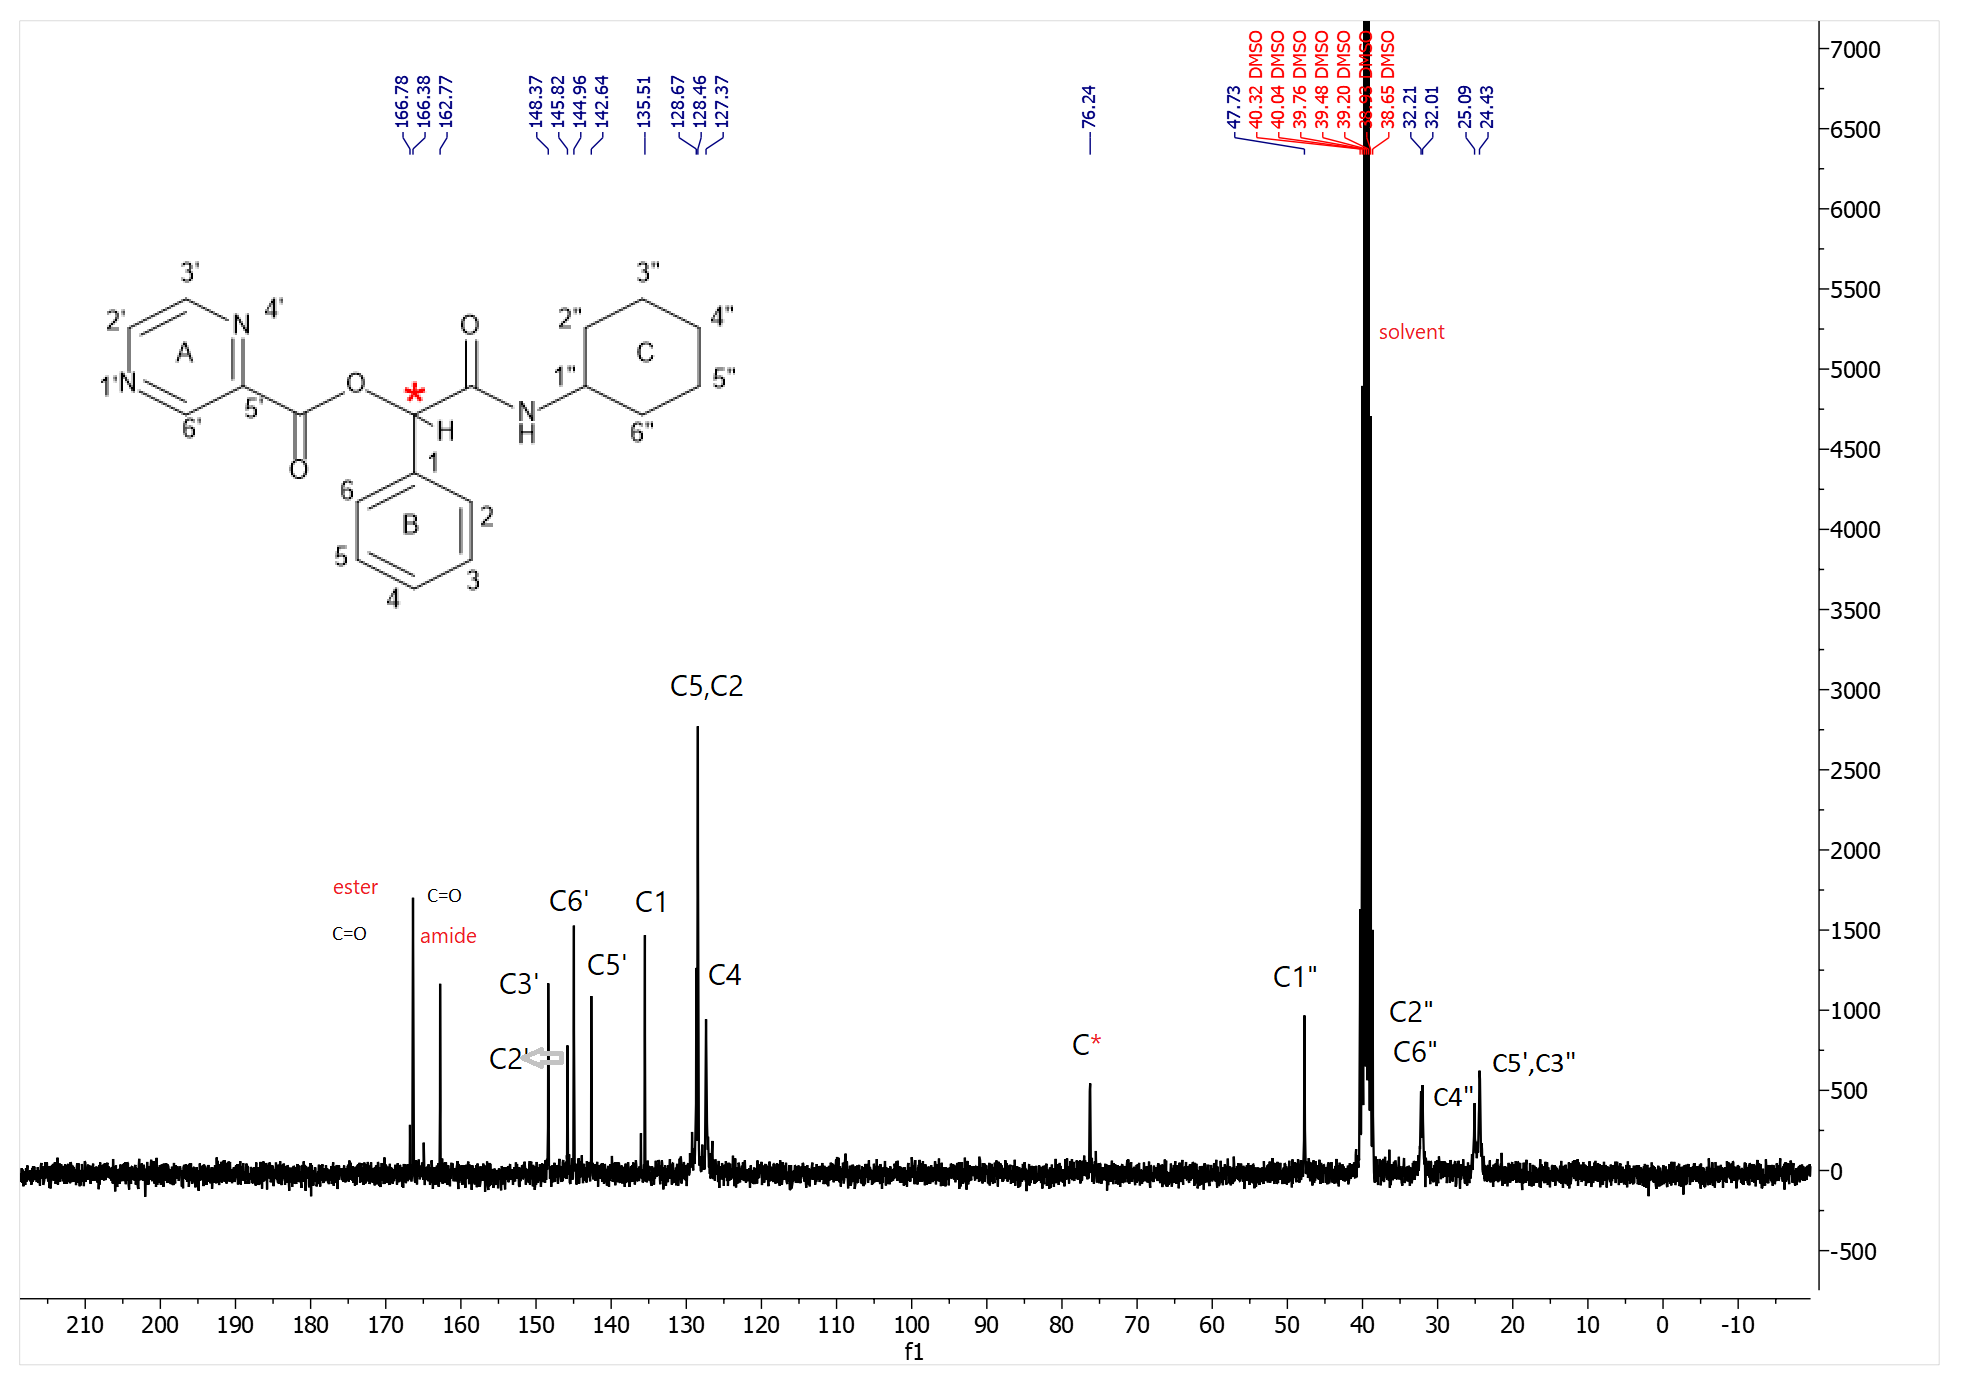


**Figure S62**. 13C-NMR spectrum of **P19**


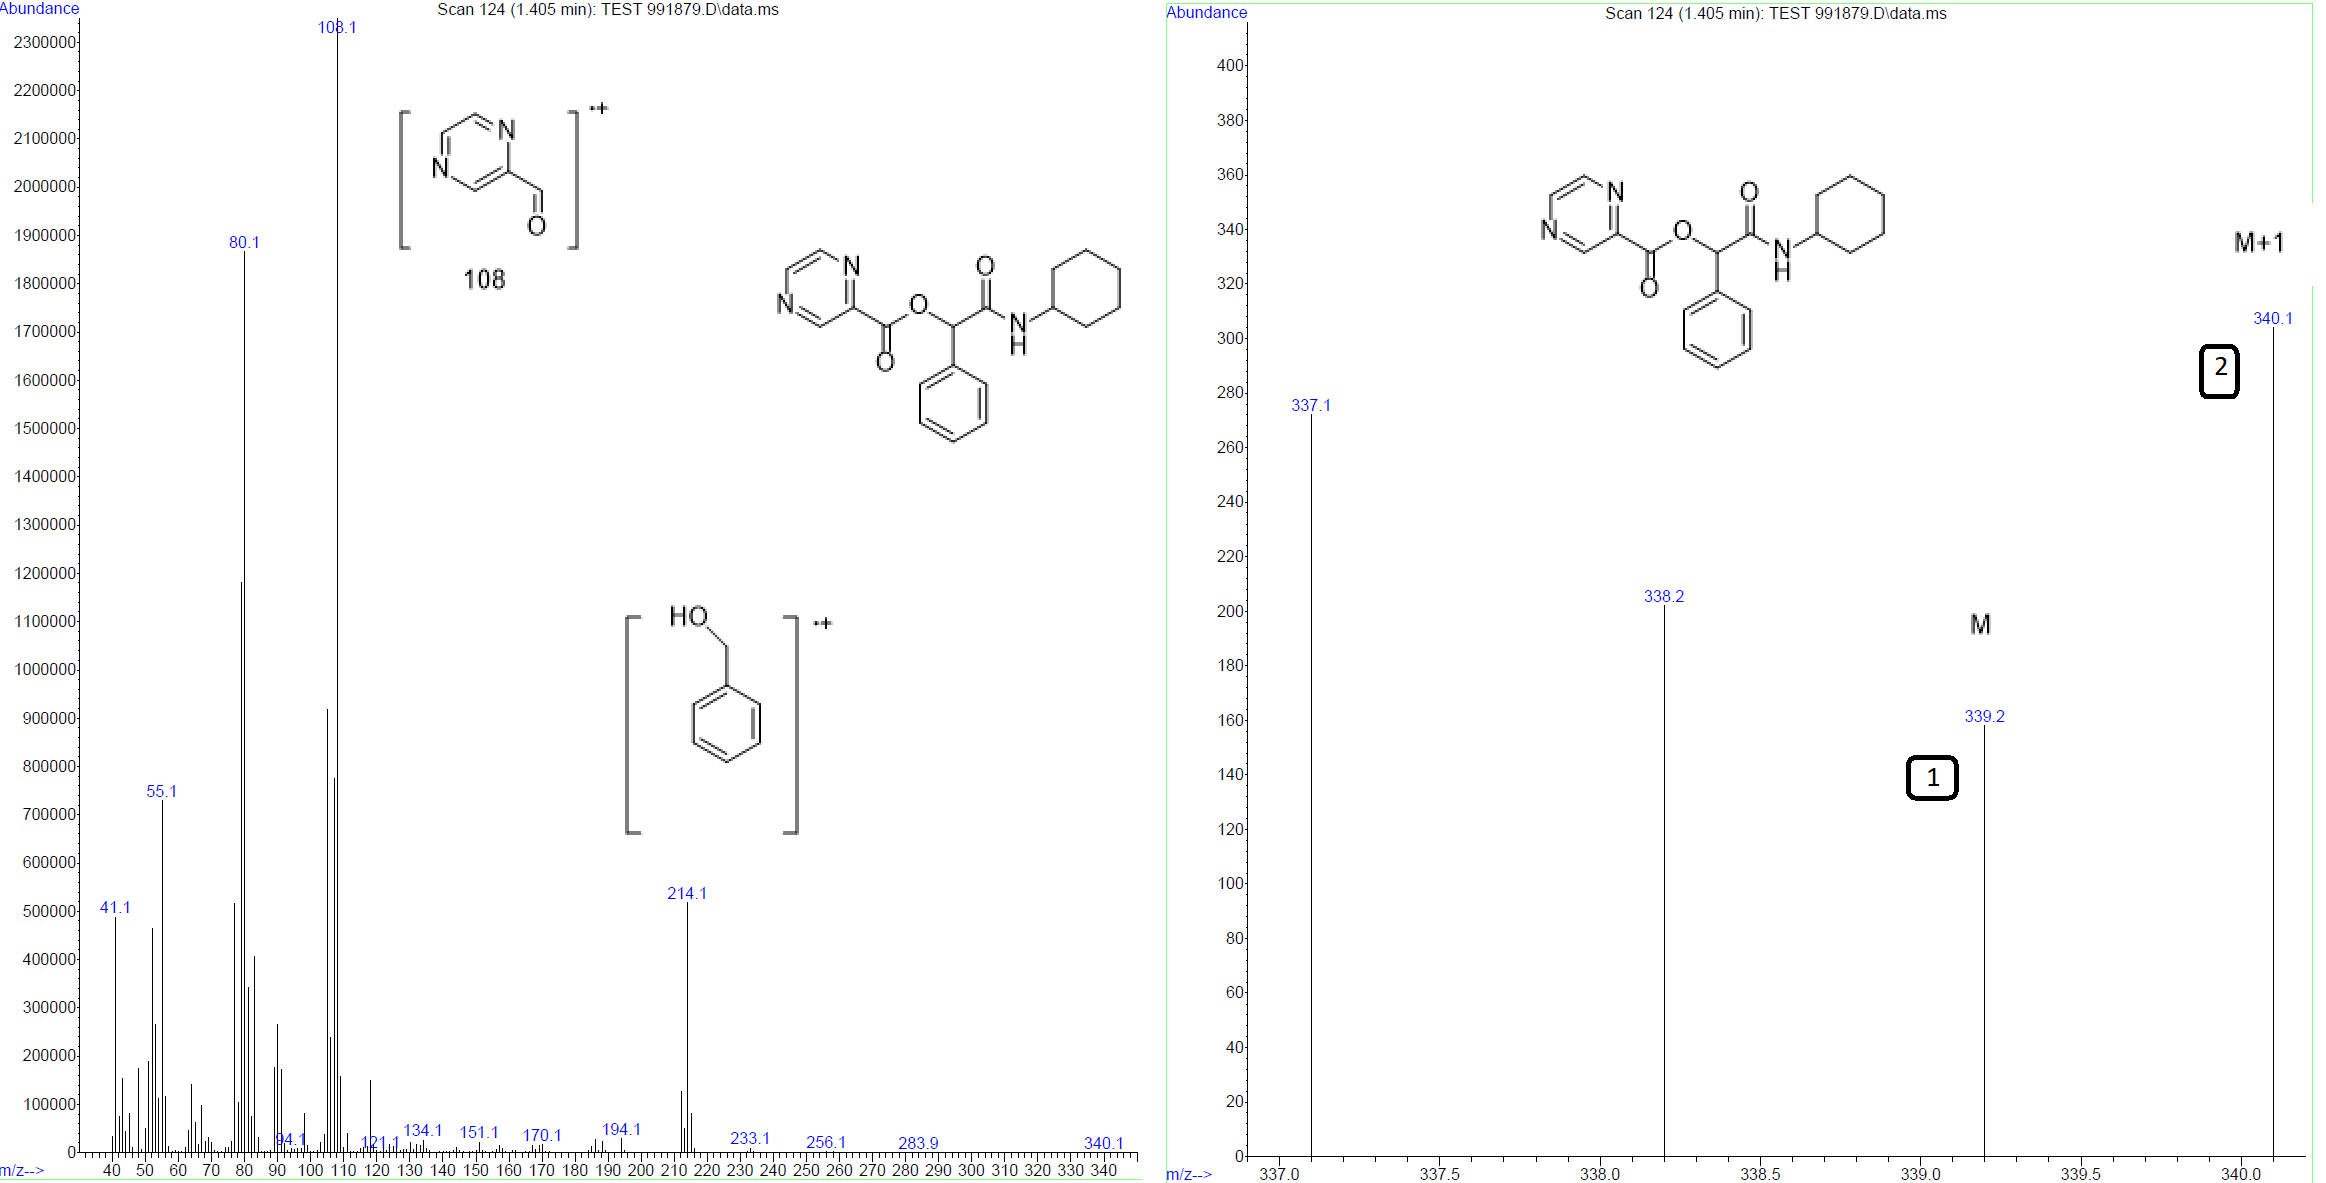


**Figure S63**. Mass spectrum of **P19**

**1-(3-bromophenyl)-2-(cyclohexylamino)-2-oxoethyl pyrazine-2-carboxylate(P20)**


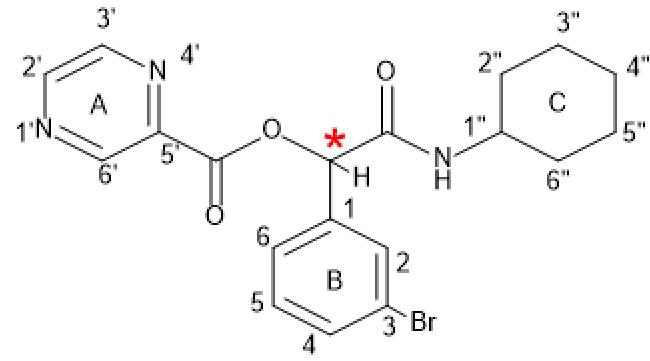


**P20**

Yield: 68%, mp: 142-145°C, white solid. IR (KBr disk): (3224.06 (NH amid group)), (3080.35-3025.97 (CH aromatic)), (2933.07-2854.21(CH aliphatic)), (1739.68(C=O ester)), (1650.87(C=O amid)), (1571.77-1413.39 (C=C aromatic)), (1164.44 (C-O)), (754.90 (C-Br)) cm-1. 1H NMR (300 MHz, DMSO-d6) δ (9.30 (s, 1H) H6’), (8.89 (d, *J* = 20.3 Hz, 2H) H2’,3’), (8.36 (d, *J* = 7.4 Hz, 1H) NH), (8.01 – 7.17 (m, 4H) H2,4,5,6), (6.09 (d, *J* = 18.5 Hz, 1H) CH*), (3.50 (s, 1H) H1”), (1.91 – 1.41 (m, 6H) H2”,4”,6”), (1.39 – 0.80 (m, 4H) H5”,3”). 13C NMR (75 MHz, DMSO) δ 165.94, 162.64, 148.44, 145.87, 144.97, 142.49, 138.03, 131.58, 130.75, 130.03, 129.90, 126.34, 121.56, 75.39, 47.79, 40.32, 40.04, 39.76, 39.48, 39.21, 38.93, 38.65, 31.97, 25.07, 24.39. Elemental analysis calcd (%) for C19H21BrN3O3 (417.07):C,54.56; H,4.82; N,10.05; found: C,54.49; H,4.75; N,9.98.


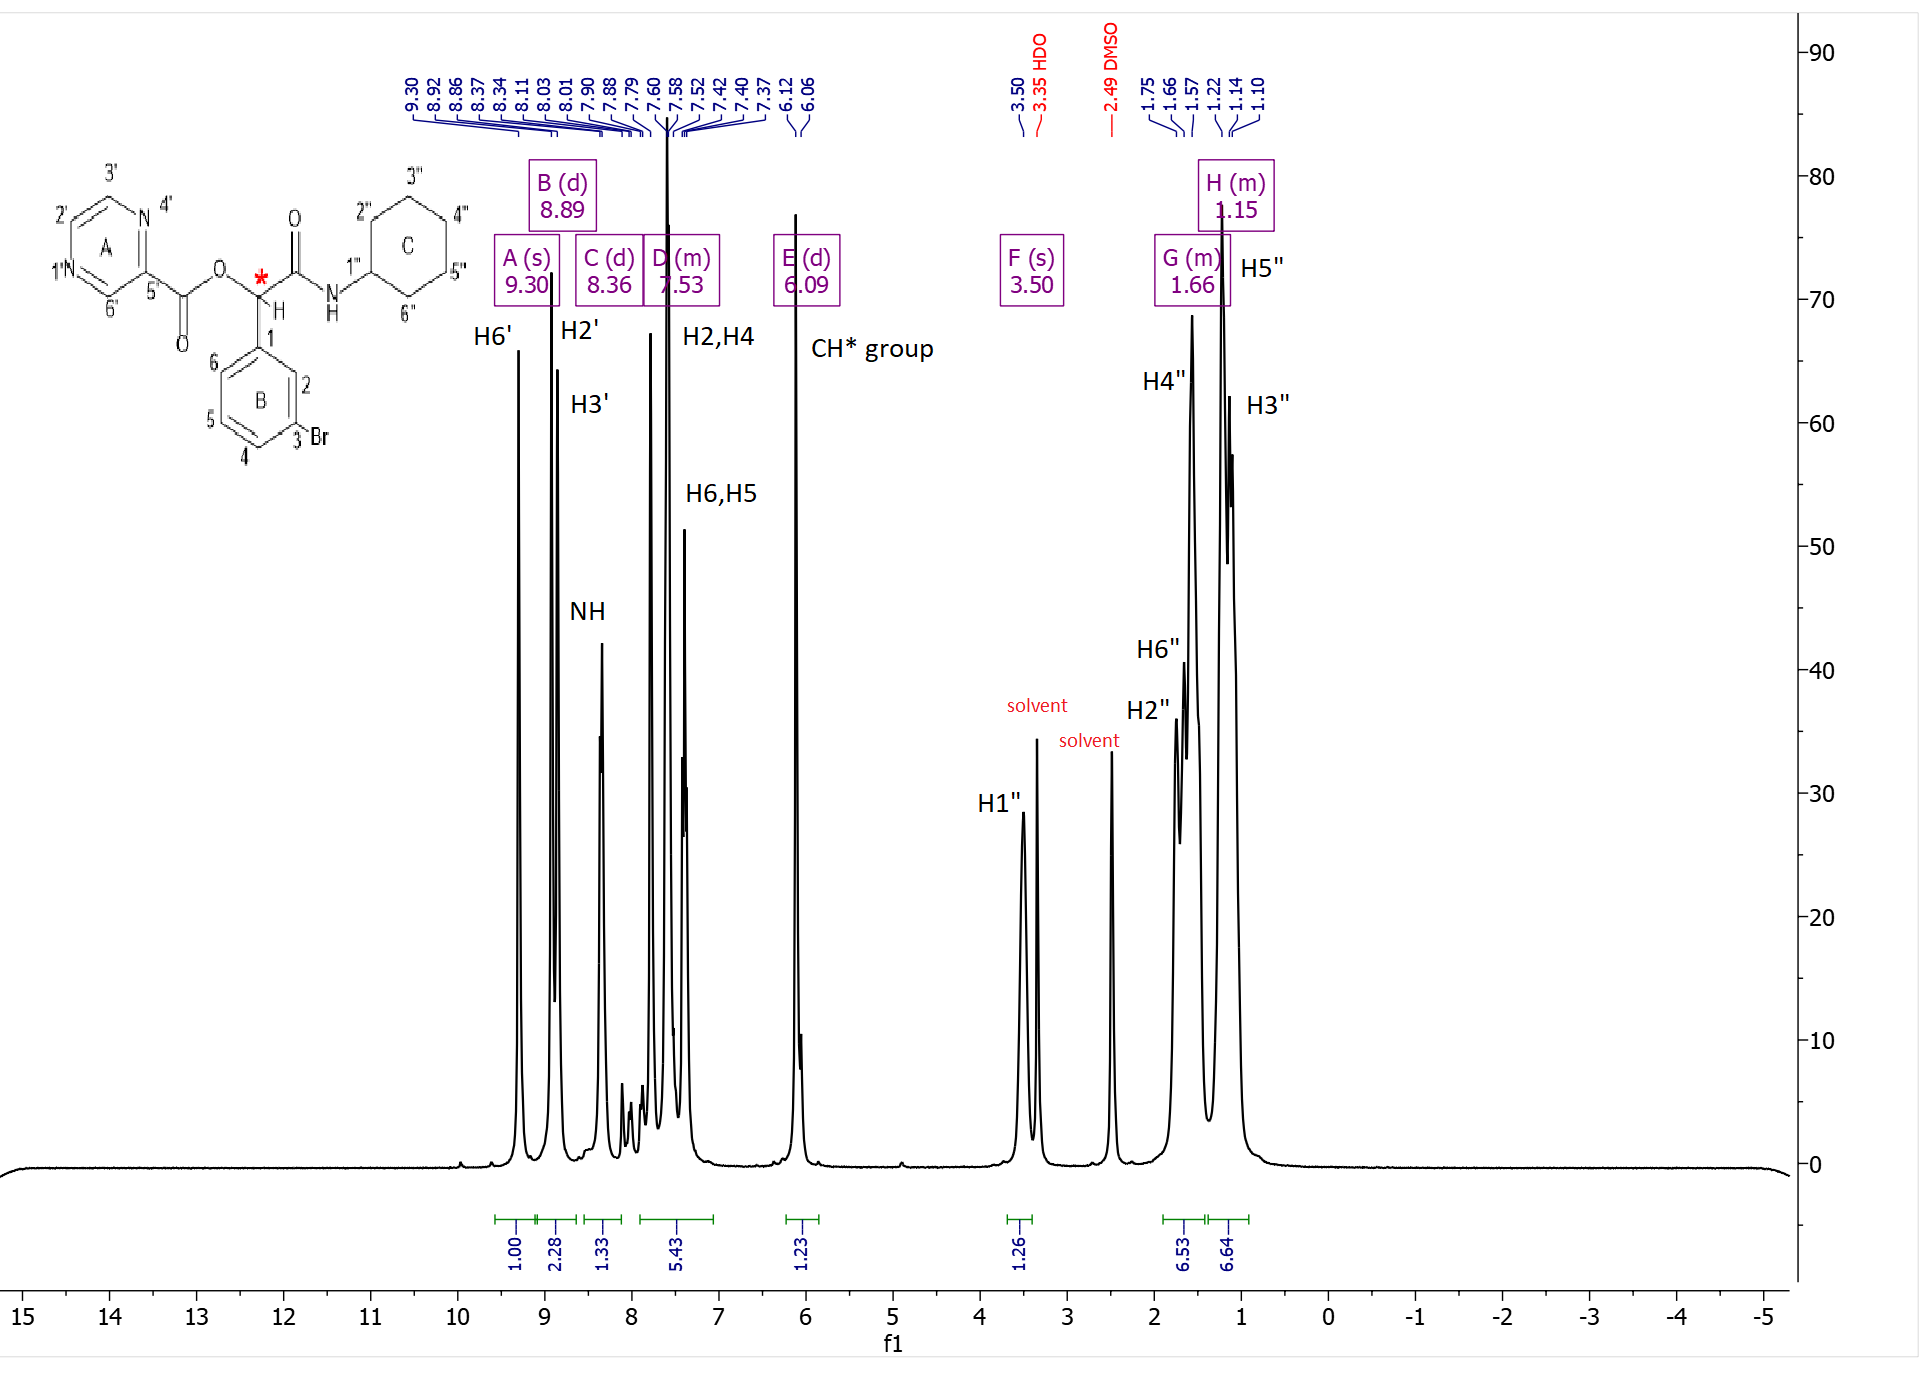


**Figure S64**. 1H-NMR spectrum of **P20**


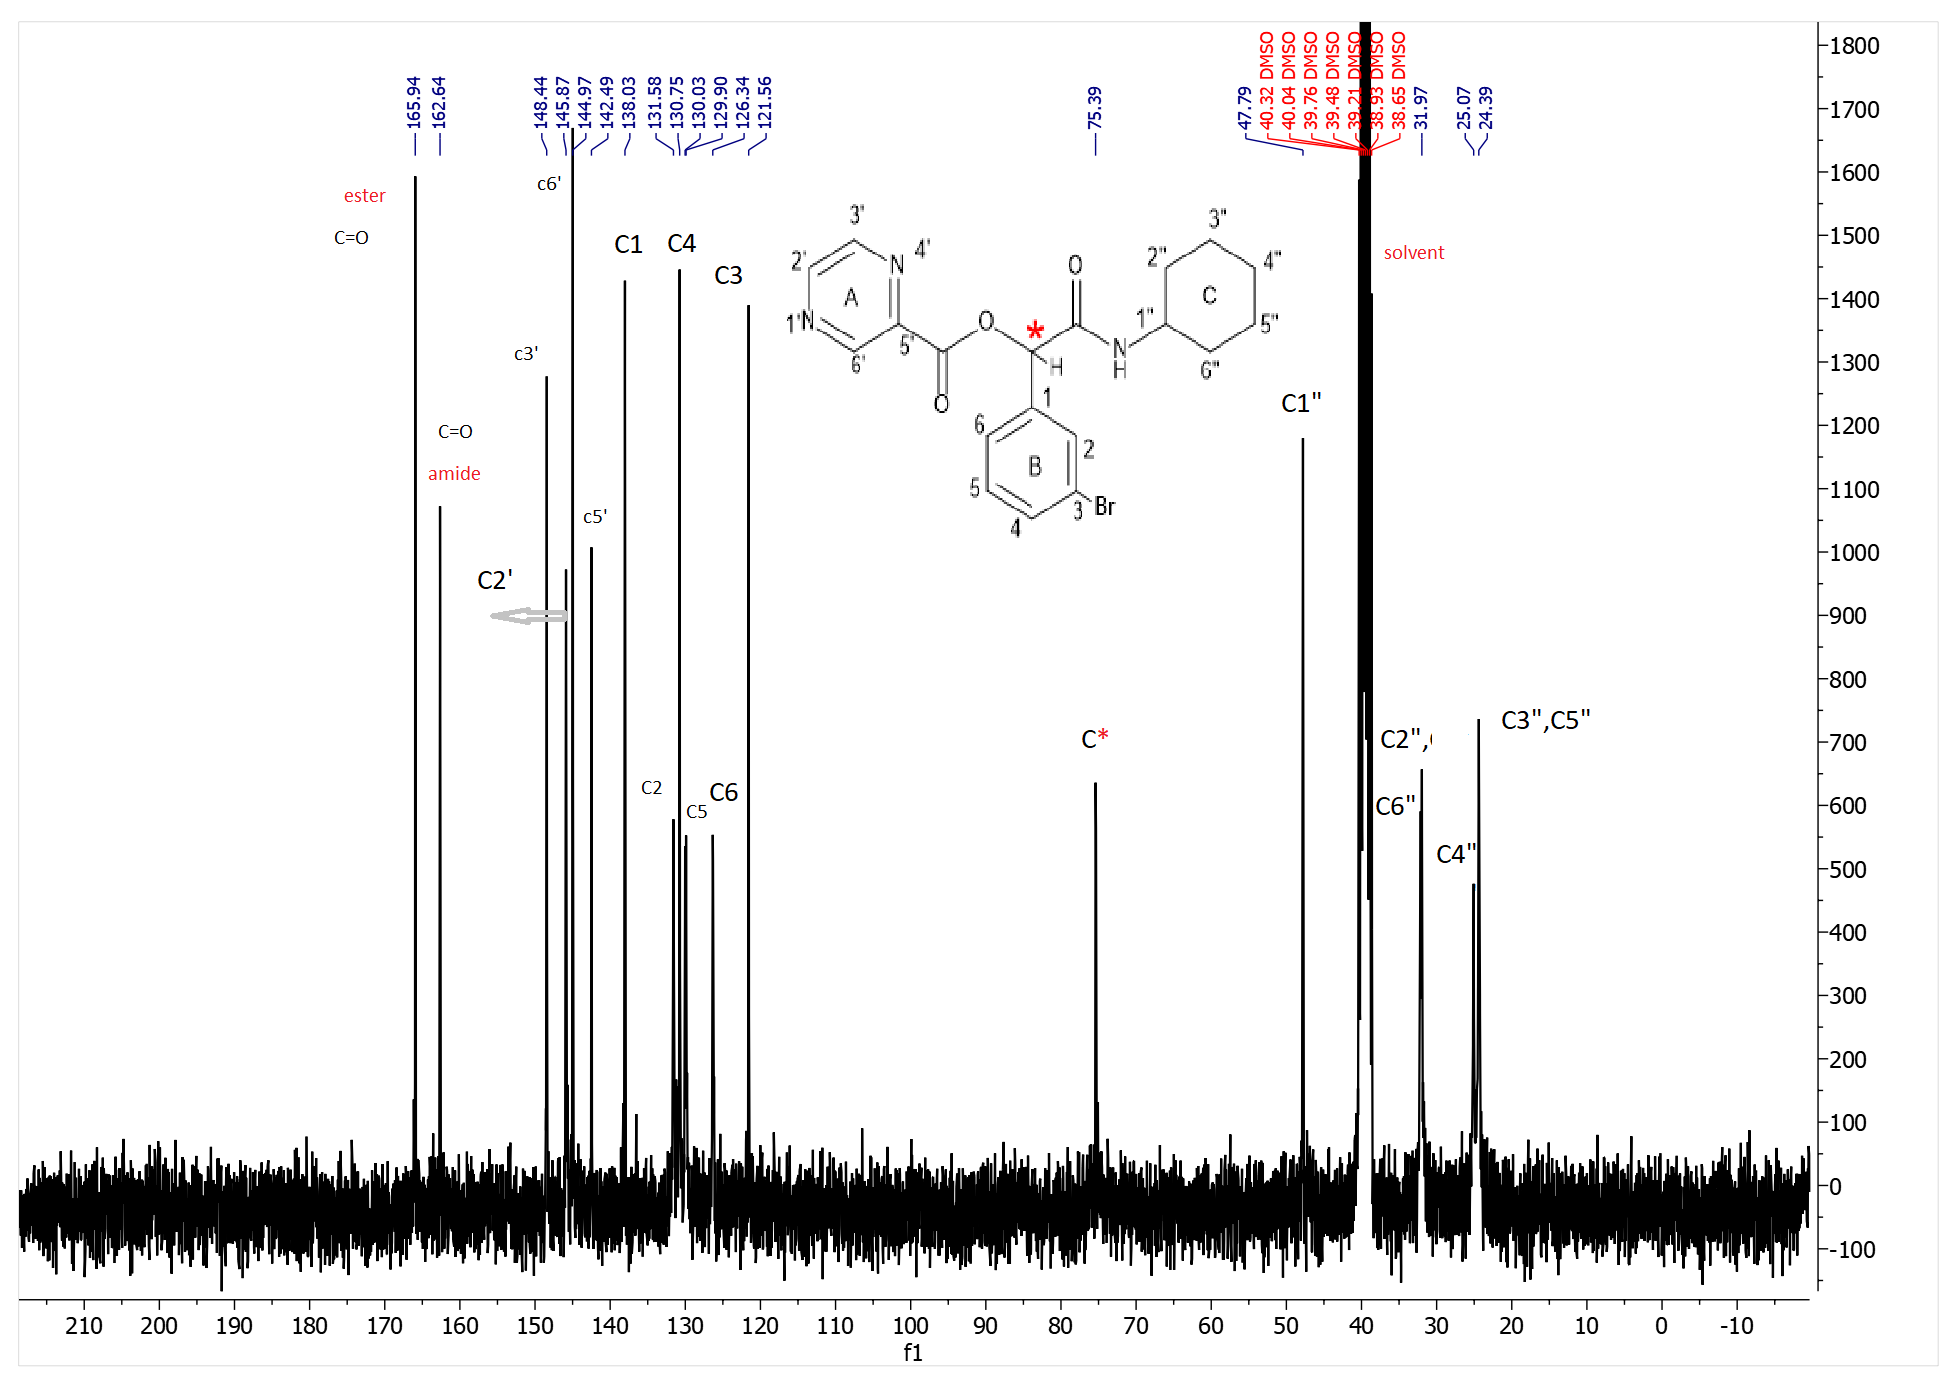


**Figure S65**. 13C-NMR spectrum of **P20**


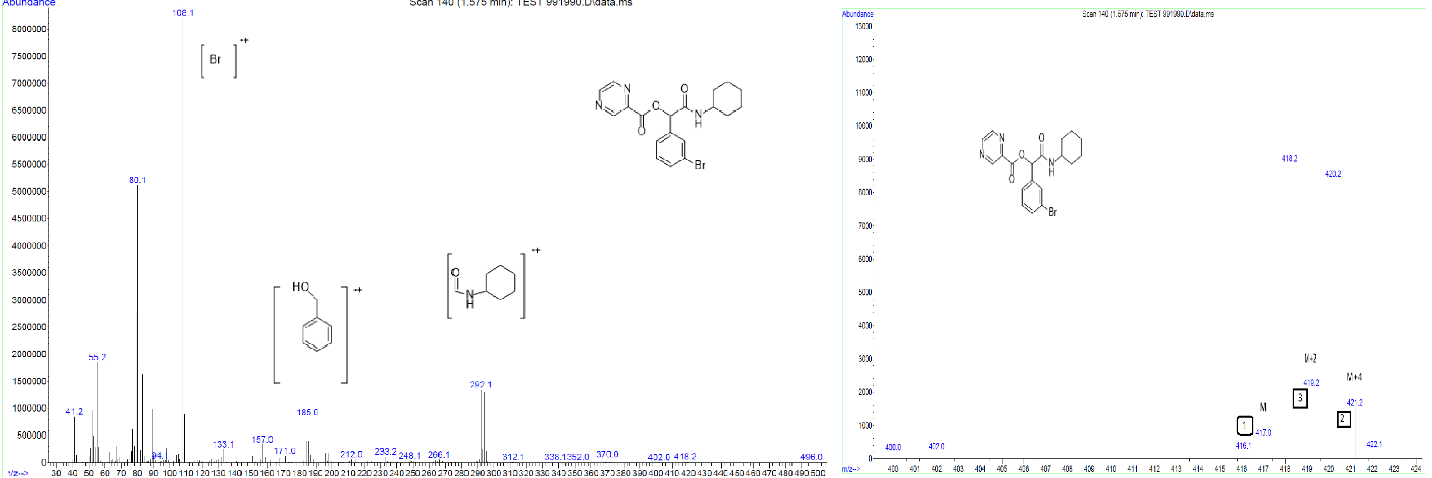


**Figure S66**. Mass spectrum of **P20**

# 
